# Supplementary material for: Functional screening of lysosomal storage disorder genes identifies modifiers of alpha-synuclein neurotoxicity
Source: PLOS journal article supplement (doi:10.1371/journal.pgen.1010760), 2023-05-18

(A) no / mild toxicity independent of  $\alpha$ Syn

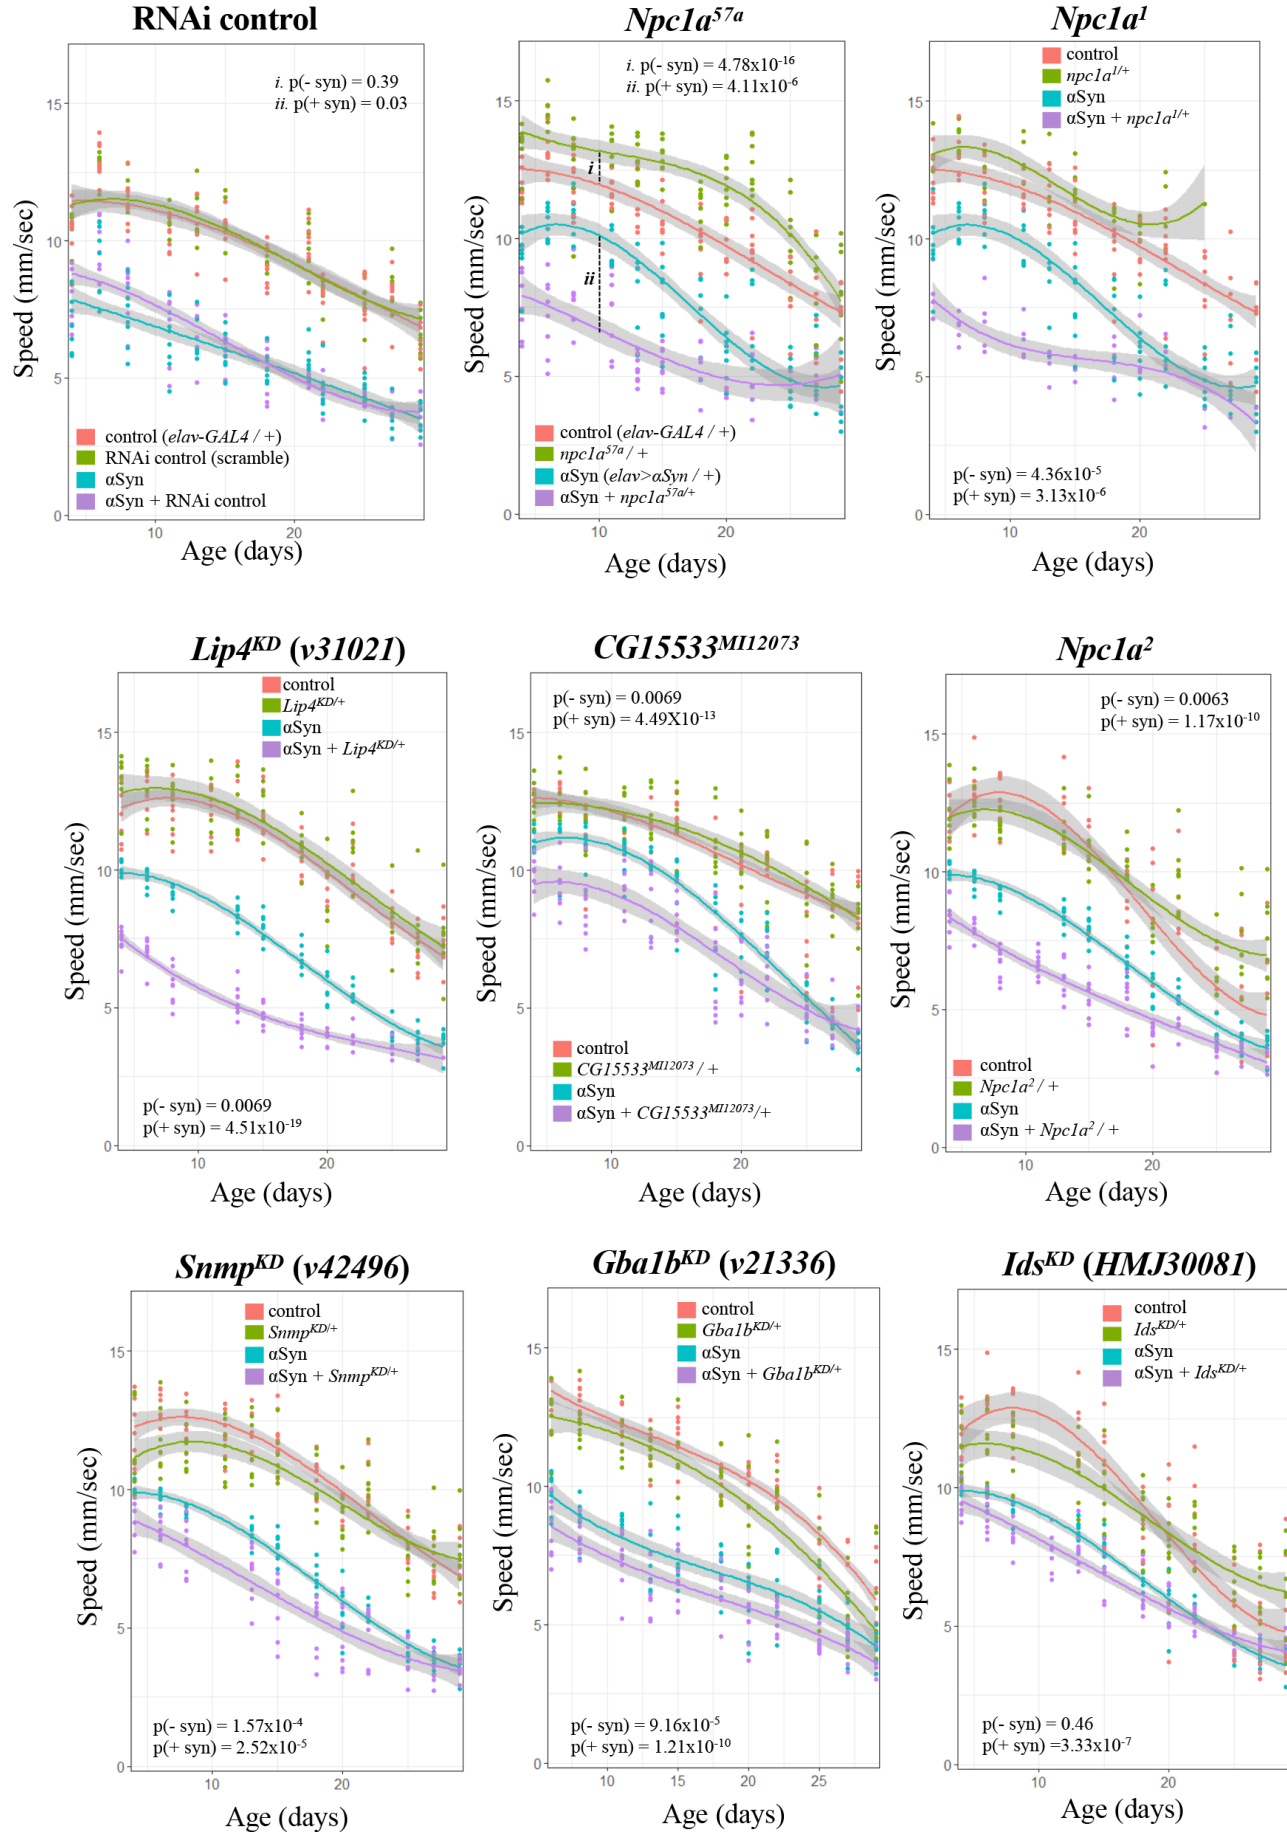

**(B) moderate toxicity independent of  $\alpha$ Syn**

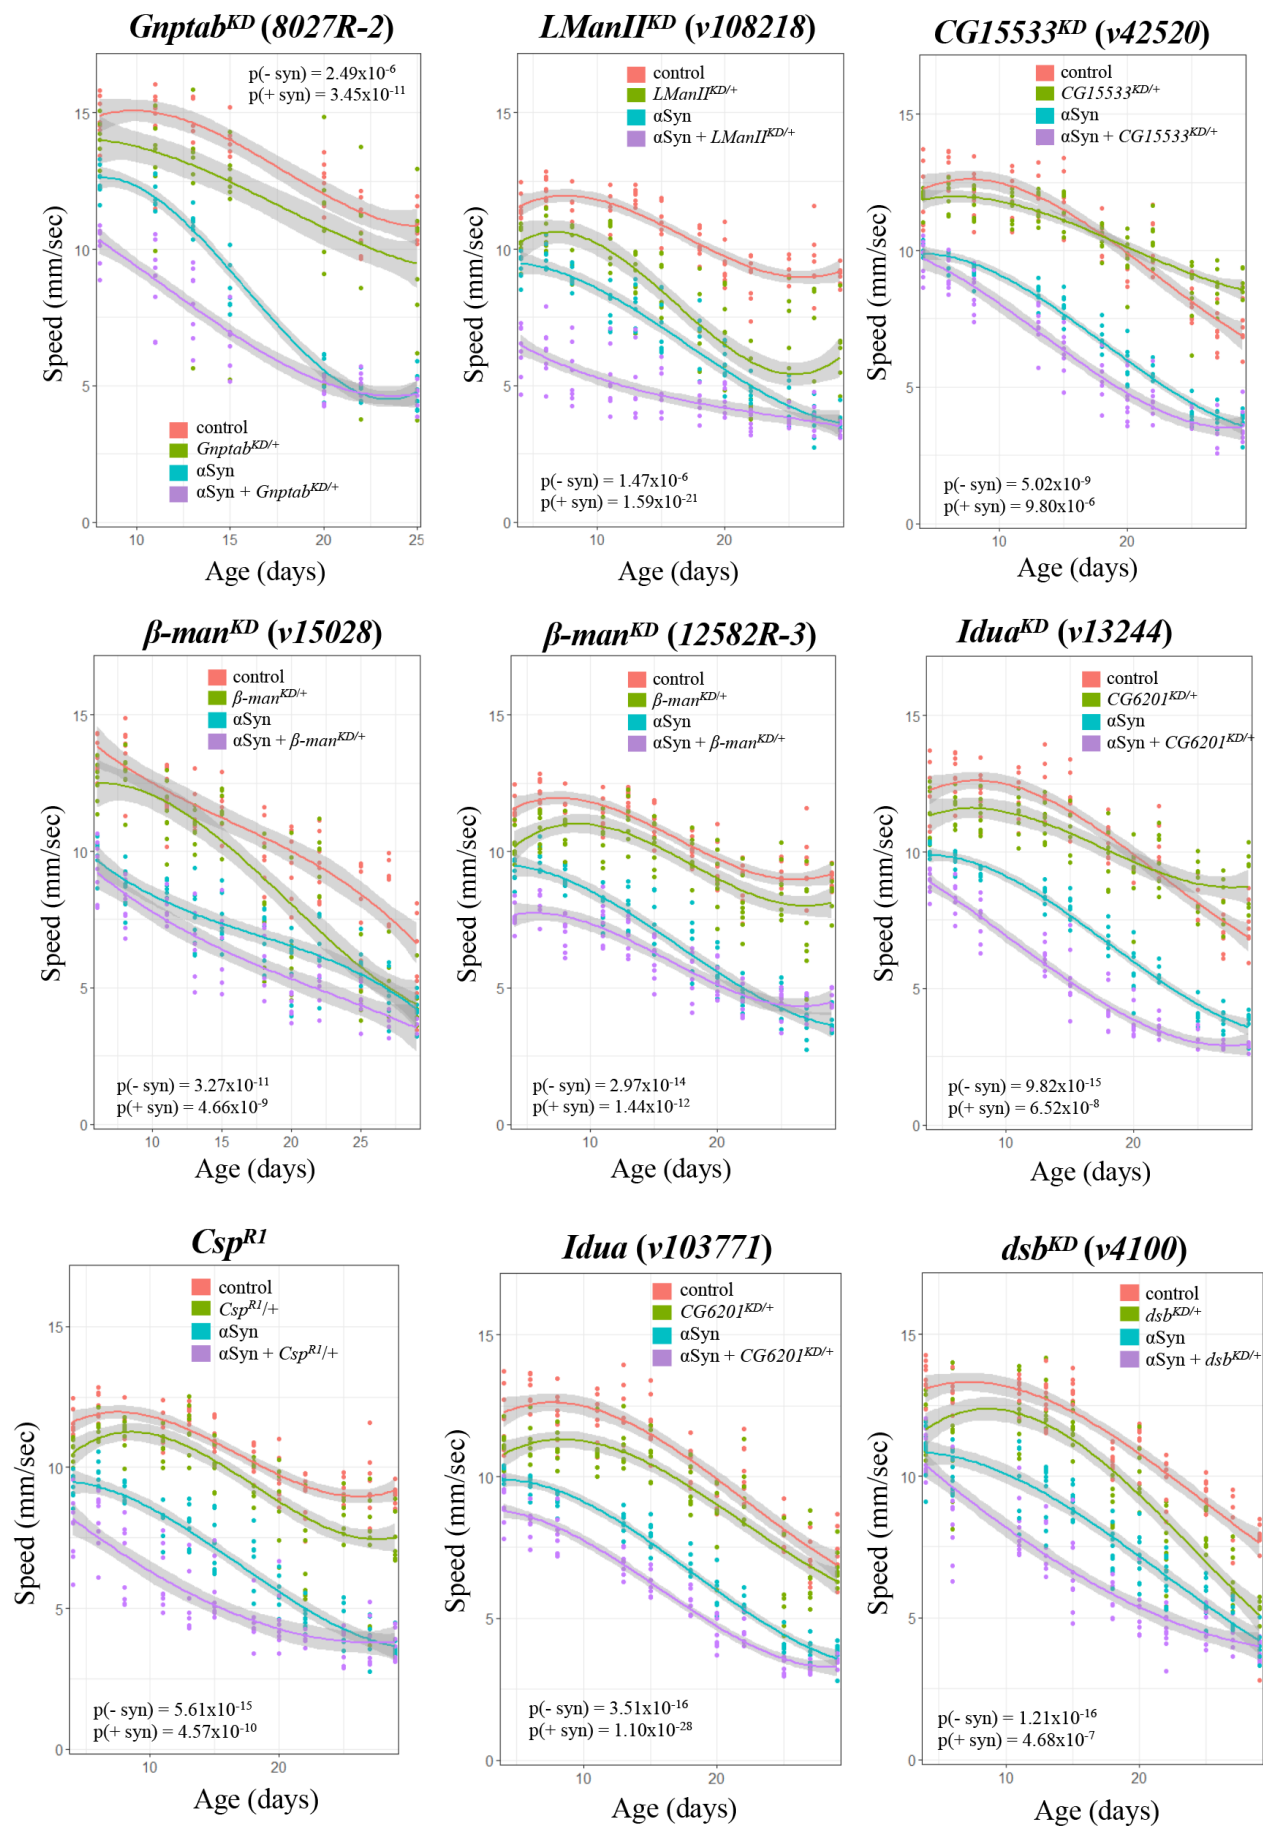

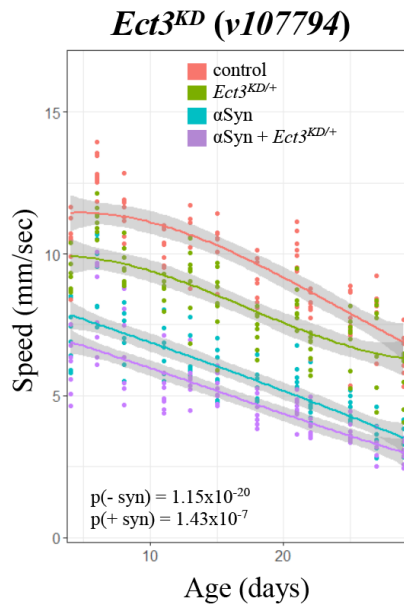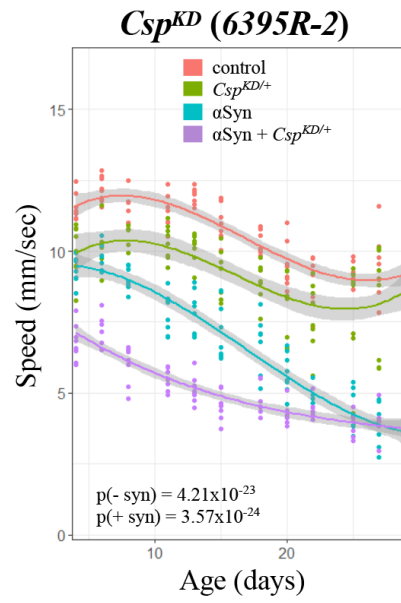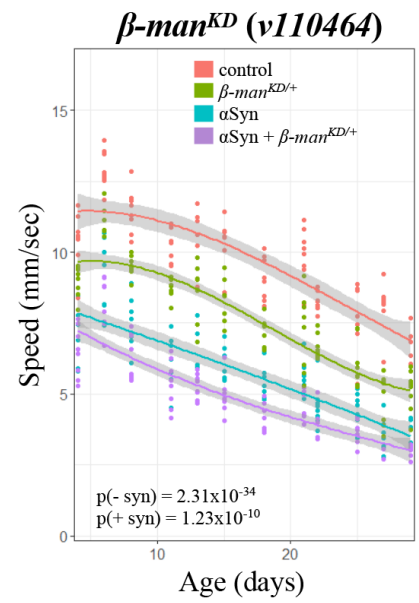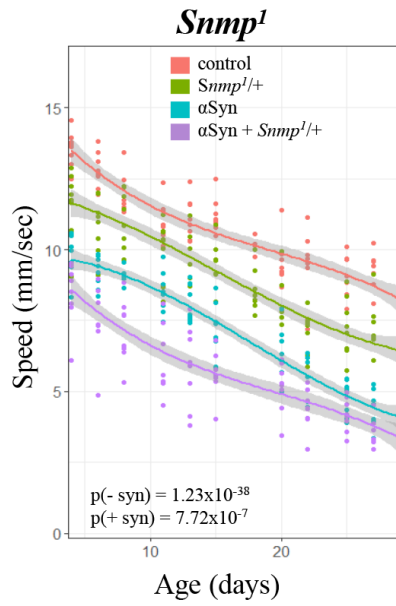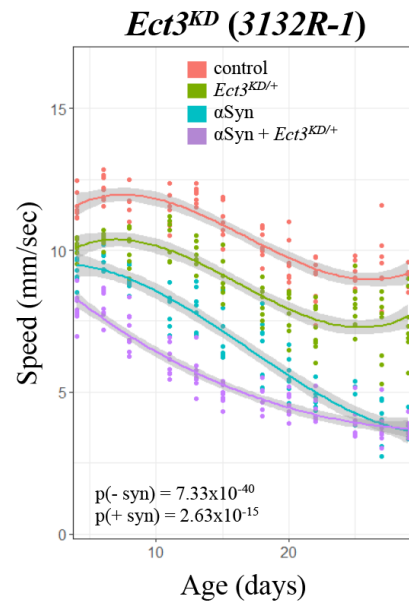

(C) severe toxicity independent of  $\alpha$ Syn

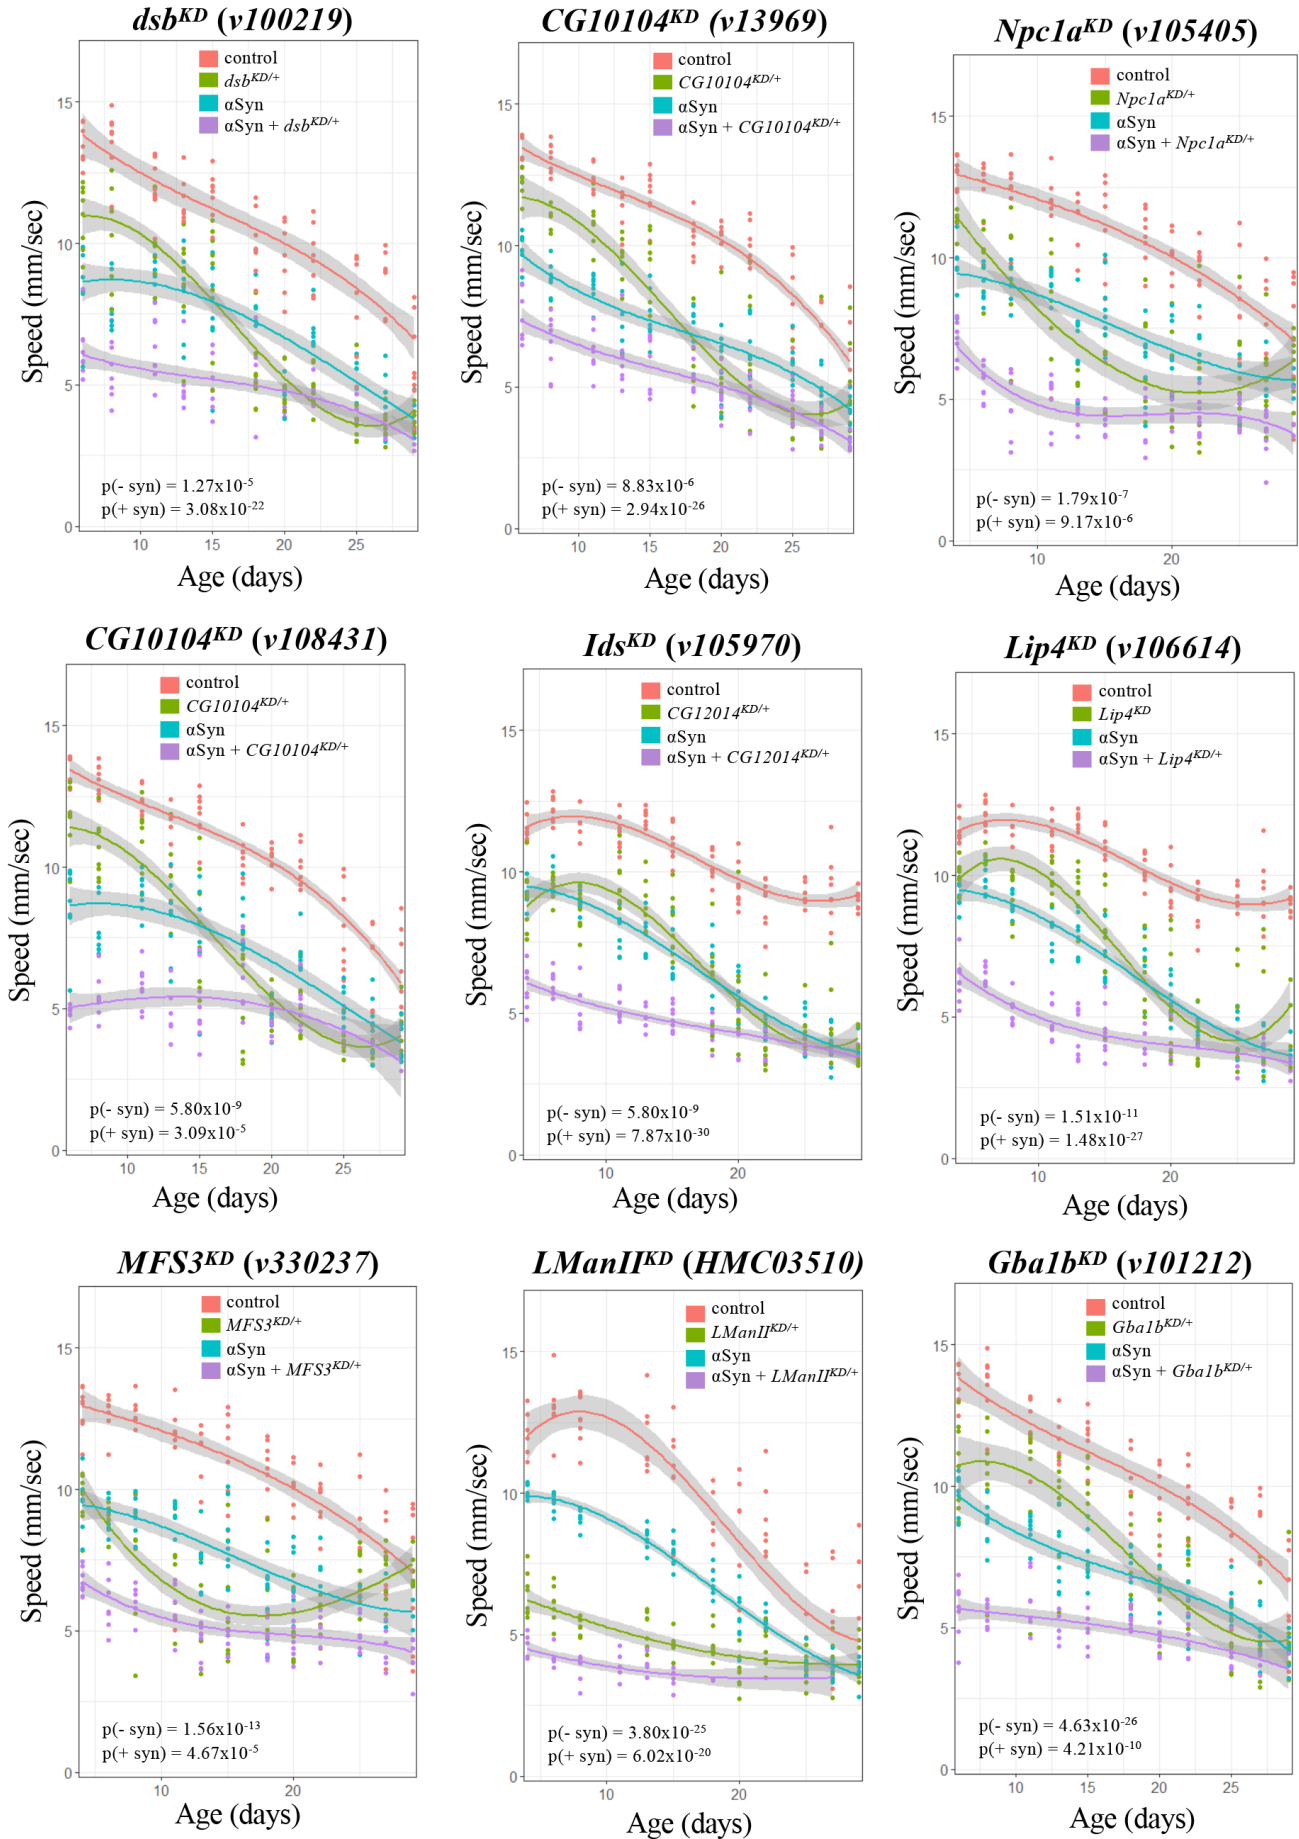

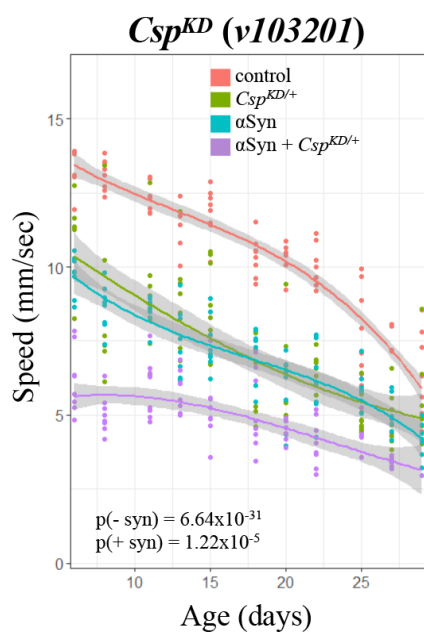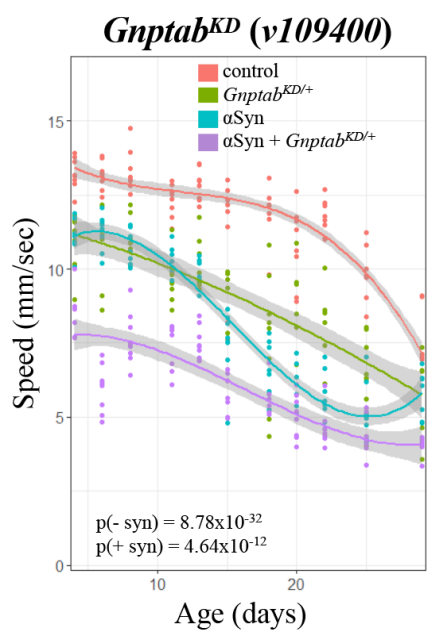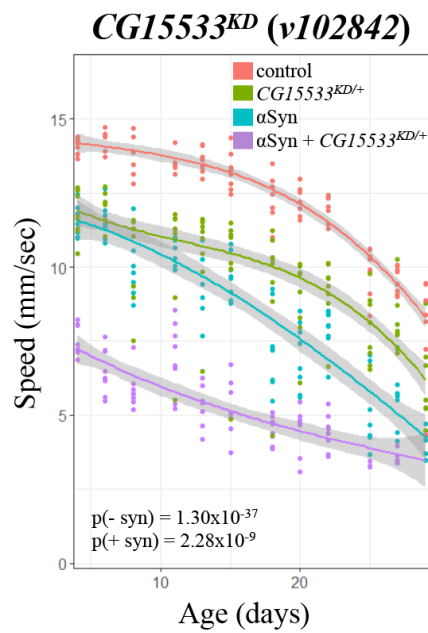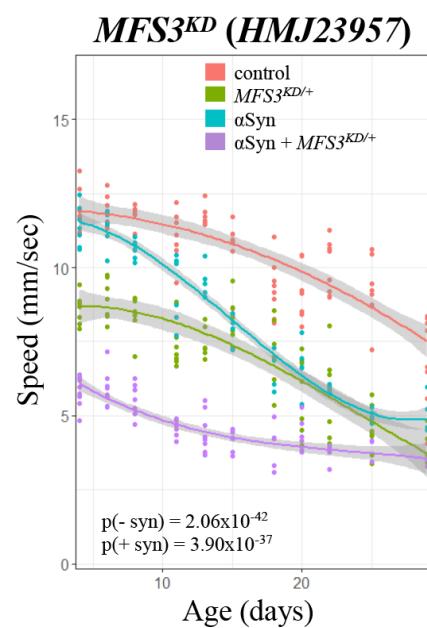

Supplement: S1 (10.1371/journal.pgen.1010760.s001) [file journal.pgen.1010760.s001]
