# Supplementary material for: Functional screening of lysosomal storage disorder genes identifies modifiers of alpha-synuclein neurotoxicity
Source: PLoS Genet. 2023 May 18;19(5):e1010760. doi: 10.1371/journal.pgen.1010760 (PMC10231792; doi:10.1371/journal.pgen.1010760)
Supplement: S2 Dataset — (CSV) [file pgen.1010760.s018.csv]

Uniprot_Gene	F1.127N	F1.129N	F1.130C	F1.132N	F1.132C	F1.134C	F10.128C	F10.129C	F10.130C	F10.131N	F10.132N	F10.133C	F11.128N	F11.130N	F11.133N	F11.133C	F11.134C	F12.129C	F12.130N	F12.130C	F12.133N	F13.131C	F13.132N	F13.132C	F13.133C	F13.134N	F14.128C	F14.131N	F14.133N	F14.134N	F15.127C	F15.129N	F15.129C	F15.134N	F2.127C	F2.129C	F2.130N	F2.130C	F2.131C	F2.132C	F2.133N	F3.130N	F3.131N	F3.133N	F4.127N	F4.128N	F4.131N	F4.132N	F5.128C
Q9VUB9_0670	1.097544054	0.927709172	1.254336062	1.17358124	1.185652838	0.896628278	1.351823318	0.867488444	0.719054956	0.798151002	0.675398048	1.15048793	1	1	1	1	1	1	1	1	1	1.317052632	1.302736842	1.044631579	1.085894737	1.117894737	1.081497797	1.027312775	1.061674009	1.243612335	1.192825112	1.393124066	1.251121076	0.849028401	1.359778086	1.042718447	1.006380028	0.822746186	1.090152566	1.077947295	0.85852982	1.564476886	0.975263585	1.036901865	1	1	1	1	1.548532731
Q0E919_10737	1.049967616	0.887635758	0.958393328	0.980815861	1.019119906	1.05338265	0.989654122	1.000464803	1.018487947	1.040301641	1.090340108	1.038811066	1.024929665	0.986980054	1.032411087	1.062317853	1.010938269	1.035695992	0.916890767	1.019696824	0.981511717	1.090798727	1.011429254	0.94750217	1.031790562	0.912855867	1.033391783	1.077193868	1.167047477	0.916491759	0.943523557	0.97237935	0.928263282	1.027978662	0.977945819	1.025171659	1.048602068	0.940733396	1.014808019	1.021812478	0.937630717	0.99005083	0.919137188	0.933797766	0.970817877	1.05961461	0.924269579	1.05616916	1.035463658
P32234_128up	1.000718444	1.186787233	1.241884471	1.152582683	1.004013378	0.966332219	1.166367778	0.84720211	0.96002877	0.909949652	0.868290578	1.032116998	1.183015083	1.006676368	1.039242099	1.03742306	1.253987139	0.992718094	1.066971744	0.972851747	0.970808818	1.125141137	1.140993243	1.112586698	1.003889098	1.08126781	1.077891847	1.052407052	1.165641896	1.076964453	1.082152268	1.090111582	1.114444963	1.089688676	1.23409261	1.008361405	1.010379906	1.06706502	0.965979574	1.067125174	1.081087584	1.069499946	1.136214957	1.128870751	0.903907724	1.016563218	1.079896181	0.905717725	1.029452548
Q9W259_13506	0.835630844	1.178123738	1.042399165	0.98942307	0.853637534	0.834243955	0.963096537	0.813686088	0.907202364	0.845332836	0.923810918	0.931077161	0.989295723	0.935498691	0.953645427	0.986745992	1.122708687	0.905334335	1.038952783	0.967626038	0.941060317	0.952955086	0.998724087	1.19205422	0.885846727	1.146168163	0.900901932	0.899013369	1.021426609	0.938615969	1.098809897	0.900696235	1.136139151	0.876255752	0.9357393	0.896879315	0.86688855	1.130926148	0.863212852	0.906223998	1.160404875	0.881778063	1.184052331	1.167442709	0.902082835	0.917967441	1.038041657	0.960186737	0.895561505
P92177_14-3-3epsilon	1.075449749	1.004491355	1.030567982	0.99056517	1.069727702	0.971509655	1.075197547	0.917390039	1.005381402	1.01927203	0.938467231	1.031488901	1.07774176	0.996171029	0.973986782	0.985748765	0.962209584	0.989178519	0.946026245	1.060527806	1.044131515	1.093743128	1.081443409	0.933090098	1.070467909	0.967752046	1.035670929	0.893696706	0.969038414	1.099309644	0.936560844	0.988789553	1.025498325	1.00446978	1.057638214	0.992126703	0.945233582	0.95569333	0.999268532	0.970118454	0.95193122	1.065102576	1.001067515	1.024239821	1.014060647	0.948011622	0.929225819	0.946099582	0.984477578
P29310_14-3-3zeta	0.975706405	0.923945587	0.932263761	0.913974211	0.959955045	1.027469593	0.99110497	0.994063856	1.019572833	1.030304366	1.017807053	1.025717012	1.014273575	1.065387352	1.061136607	1.081843959	1.014350659	1.049921676	0.964795418	1.020849868	0.981904006	0.992055404	0.972086331	0.913197751	0.926173989	0.84059585	1.050918331	1.010243236	0.941900449	0.930359691	0.965117652	0.995875714	0.958611438	1.004577963	0.963569777	1.003088383	0.950446847	1.012554134	0.954423974	0.911930617	0.96752405	0.938624454	0.965589183	0.962759232	1.040870975	1.073893313	0.988940878	1.104935523	1.124583215
P81928_140up	1.126215474	0.878468745	1.120788241	1.048166694	1.1530932	1.155516072	1.160364791	0.901629265	1.024285275	0.9196639	1.063940978	1.438569526	1.396077215	0.999147221	0.89355764	0.945887278	0.887433134	1.22119613	1.243843448	1.168645558	1.333992964	1.710019706	1.390480521	0.979081401	1.190541155	1.123844172	1.037165945	1.074574014	1.152356164	0.969098998	0.894807876	1.015322325	1.02254684	0.908939346	1.269529632	1.028840767	1.030789467	0.884758727	1.16210752	1.248313156	0.902638053	1.358294982	0.811894017	0.862070506	0.99787138	1.051538412	0.802167322	1.177643037	1.013860336
Q9VLM9_15010468	1.109704379	0.930102683	0.817982695	0.870411508	1.105929505	1.005708915	0.803866376	1.107281321	1.059996105	0.998858144	1.104714359	0.947076318	0.954448846	1.113786915	0.973990853	1.033559656	0.946170577	0.968391839	0.875139875	1.066016297	1.112457421	0.993020853	0.831993237	0.919782078	1.167245914	0.940606801	0.972778902	1.004886555	1.096528121	0.871345575	0.956077919	1.008839466	0.886085705	0.963289477	0.846923369	1.085246219	1.106190403	0.955511776	1.05408024	1.049308454	0.958676818	0.995315766	0.882222984	0.895317864	1.341403931	1.021251467	0.921328926	1.06486644	1.027280586
Q9VMC6_152078_at	1.018133816	1.083707886	1.177784477	1.038341373	1.096689323	1.211905284	0.98920389	1.22342179	1.129154991	1.02792429	0.98730839	0.977391352	0.974277211	1.10009212	1.20272345	1.202522676	1.051658163	1.241193504	1.063187712	1.147337278	1.154311973	1.111576549	1.065568311	1.199263868	1.069774779	1.110805363	1.187655183	1.319609114	1.149454056	0.997387446	1.141058939	1.155025811	0.973564247	1.039691349	0.975781705	1.079228977	1.24688289	1.201009905	1.029869878	1.025169936	1.101048747	1.051639069	1.126527647	1.114013685	0.927074423	1.126991553	1.176018499	1.173799722	1.074435381
Q9W3N9_154229_at	0.952327522	1.167909434	0.983091678	0.971573712	0.996404273	1.186712626	0.877750702	1.398757881	1.128037092	1.067085277	1.085659926	0.872619962	0.848520604	1.263609049	1.26736155	1.222953075	1.034281042	1.170293794	1.180553024	0.963148468	1.274730558	0.910725582	0.905906297	1.156230996	1.063521653	1.083523059	1.212242028	1.232686029	1.072805387	0.965133028	1.216321941	1.163732142	1.007126144	0.992132091	0.884114187	0.985032618	1.169372806	1.181176169	1.009498469	0.972030326	1.185612848	0.814983604	1.099600263	1.111301103	0.99243375	1.187621326	1.173861225	1.298436489	1.163131944
A1ZBR2_18w	1.05389011	0.963516484	1.078681319	1.137230769	1.140395604	0.954197802	1.381132075	1.019077568	1.155345912	1.121174004	1.106079665	1.254716981	1.085536254	1.35347432	1.160120846	1.117258308	1.23168429	1.372964169	1.361563518	2.153094463	1.480456026	1.201983471	1.127272727	1.05338843	1.136528926	0.879173554	1.041483275	1.066241197	1.263754401	0.97128081	0.917425331	1.009742853	1.064206996	1.079060853	1.27675831	1.031607131	0.993143081	0.937634689	1.14386469	1.167439431	0.966956181	1.187106565	0.874213129	0.980553058	0.955943229	0.952887838	1.057066824	0.999310073	1.028273401
Q9VM18_21430192	1.061793006	0.820475642	0.76104168	0.818366755	0.95386788	0.776629879	0.881684016	1.016938442	1.001475033	0.943250502	1.014187375	1.040531989	1.046873906	1.034972015	0.946759695	0.893792469	0.852799488	0.905519027	0.867085114	1.056093948	1.028791867	0.979052938	0.87785915	0.896593629	1.07541359	0.806401996	0.870335748	0.946297753	0.912689451	0.899082537	0.876949783	1.058076285	0.841960679	0.94330237	0.854711305	1.100091787	1.069854435	0.892242515	1.052863721	1.111724888	0.966245249	1.04430812	0.85246182	0.85644132	1.173021342	0.920214456	0.942110217	1.002728444	0.942862635
Q9W4J7_24639695	0.95107286	1.061935078	0.882142576	0.870785192	0.966045744	1.30755325	0.831363278	1.272317911	1.089609366	1.17302713	1.190251041	0.891252955	0.876137671	1.08996757	1.138612826	1.343864421	1.035568574	1.241678726	0.998158137	1.028329606	1.007455159	0.876456646	0.922970571	1.035848311	1.06695635	1.035157022	1.203925278	1.303712462	1.220335777	0.905131237	0.994309385	1.024017741	0.841415959	1.074814846	0.891887984	1.147732202	1.077938979	1.2407577	0.990456452	0.910348484	1.071383815	0.878851541	0.969012605	1.005033263	1.049125881	1.272893171	1.084747619	1.28960911	1.154984847
Q9VWV5_24643014	1.136917037	1.089084518	1.015996473	0.975824106	1.061387681	1.211370497	0.938256739	1.04035768	1.254069342	1.000369141	1.171571557	0.941905964	0.887290467	1.172226059	1.152894629	1.199977363	1.137491819	1.108907493	1.077780374	1.072749212	1.255959444	1.006460108	0.950679695	1.035548561	1.237552704	1.055893591	1.149903069	1.150221791	0.955907866	0.970478741	1.129253933	1.265991207	1.031141322	1.077362666	1.018742864	1.239574123	1.184661026	1.11911858	1.208304789	1.073538855	1.074018991	0.923483442	1.088140943	1.12196127	0.96783598	1.15724521	1.089858915	1.10030948	1.143032779
Q9V3U6_26-29-p	0.922653797	0.844470059	1.353920658	1.025828137	0.9841283	0.822813011	1.519783988	1.082357331	1.021703713	0.877821198	0.799989746	1.50233557	1.515130068	0.924970582	0.763535429	0.900266171	1.074425865	0.819893382	0.844816271	1.005272829	0.964884826	1.497711887	1.510335373	0.974210325	1.034427689	0.881125542	0.850410067	0.836363877	1.05219662	1.033083344	0.795002911	0.861706827	0.973396833	0.80653173	1.296199929	1.071572832	1.155123824	0.806066938	1.028255148	1.511810133	0.773958815	1.541597164	0.864889687	0.877229927	0.99195401	0.808953598	0.809492631	0.846129966	0.829078614
A8JQY2_3	1.096726137	1.050005385	1.157752091	1.11584162	1.149513587	0.965107513	0.942465281	0.794789959	1.160355387	0.856637626	1.108643147	1.060640041	1.182918093	1.000955186	0.985035421	1.042824166	1.075300486	1.010414223	1.005957686	1.192287845	1.059623774	1.285934831	1.184699777	0.977762449	1.172710551	1.054854815	1.01840405	1.023718289	1.187816407	1.044863368	1.032928765	1.072668613	1.149485328	1.066932965	1.259478406	1.038451528	1.005014662	0.932033107	1.143395048	1.161440891	0.99285107	1.182147231	1.045992652	1.022315961	1.076984299	0.994428768	1.033210332	0.944577093	0.935779233
Q9W0F9_312	0.79474313	0.863639984	0.891596973	0.868578256	0.818558343	0.742970928	1.307692308	0.737062937	1.051748252	0.727272727	1.051748252	1.158041958	1.037210757	0.873671044	0.866166354	0.929330832	1.023452158	1.022202084	1.036248301	0.947893068	1.044857272	1.121394231	1.527644231	1.366586538	1.221153846	1.378605769	0.990797068	0.928092341	1.203556387	1.019185774	0.891899853	1.042120766	0.881001473	0.910162003	1.004422869	0.891585761	0.917367853	0.909277238	0.958791802	1.09978425	0.950377562	1.196055293	0.725893459	0.784558328	1.103043478	0.936231884	0.866086957	0.993188406	1.028295715
Q9VIP3_38B.13	1.097696364	0.971690258	0.908076603	0.943269498	1.073050236	1.106633361	0.934568503	1.099756216	1.225255973	1.027206241	1.253339834	1.066504144	1.09277481	1.247118358	1.019679505	1.319370256	1.098678662	1.164230439	0.982612019	1.057991784	1.156682908	0.989361702	0.997582205	1.011847195	1.161750484	0.875483559	1.101153669	1.090170743	1.221873558	0.947485002	1.130378096	1.09039548	0.976531943	1.060843112	0.836967461	1.182824556	1.079587387	0.876467628	1.026249581	1.152717209	0.905233143	1.007457122	0.973097	0.948832674	0.907161203	1.051971597	0.896736667	1.063755854	1.170426829
Q9VIM0_38C.55	0.826521117	1.012920544	0.970830351	0.912813171	1.072208304	0.901789549	1.057098454	1.046643523	1.051770072	0.913857829	0.93872361	1.142009446	1.064214102	0.987792416	0.91054216	1.038859889	1.02115613	0.761216017	1.011919111	0.804406053	0.88844248	1.037763381	1.013035273	0.859569252	0.919395319	1.010681142	0.931983098	0.986432277	1.142790922	0.983169605	1.139958994	0.717384267	1.268623431	0.684435812	0.945875311	0.929786845	1.042897891	0.967246976	0.964183844	1.068611334	0.983475952	0.881819069	1.213721089	1.104498878	0.871536739	0.863993498	0.967089221	0.917081379	0.840629489
M9PDA6_38D.29	1.161384721	0.978332607	1.001930141	1.023659797	1.149803873	1.09158832	1.032902754	1.088959298	1.116134536	0.916524494	0.996222276	0.996953449	0.978803778	1.239874082	0.993913956	1.036935992	1.021406086	1.121053881	1.158319487	1.157370045	1.009969143	1.131782364	1.141538462	1.277523452	1.087204503	1.129981238	1.251871192	1.050130548	1.177023499	0.965361184	1.3815427	1.150137741	1.304407713	1.158402204	1.135430464	1.147615894	1.095231788	0.998874172	1.093311258	1.198874172	1.005364238	1.12	0.90553719	0.936280992	1.348351532	1.121700413	1.179158274	1.050567158	1.167456322
A1Z7V9_45551045	0.932178957	0.825410527	0.701916174	0.819906442	0.885536677	1.514455346	0.713894846	1.432147821	1.107327535	1.159447269	1.285277799	0.793970469	0.820736057	1.207417675	1.272234076	1.56934083	0.95333323	1.297189029	0.948132426	0.895402171	1.011445459	0.785484312	0.75617797	0.944154514	0.925559226	0.867199063	1.136244863	1.515112263	1.129779346	0.806041927	1.07840005	1.034415473	0.84005703	1.070792638	0.763167665	1.068231344	1.1367145	1.120159481	0.919681684	0.853587513	0.992003357	0.743537553	0.900311323	0.924808727	1.086806368	1.581217926	0.997177238	1.5563525	1.283169355
Q8IH18_4E-T	1.068488017	0.960716047	1.039994082	1.028622152	1.07885393	0.99307624	1.049748245	0.916211616	0.980107794	0.941670803	0.954648606	1.10740373	1.108242139	1.008200582	0.986119961	0.988225516	1.108325253	0.977817669	0.858870795	1.100397487	0.944693764	1.126655539	1.110759247	0.979189742	1.040871722	0.992730449	1.050271162	1.001241845	1.225701485	1.005124578	0.941108378	0.942808566	0.997721024	0.981768196	1.072953208	1.026242647	1.021587781	0.918735496	1.07553025	1.086782881	0.946718657	1.050663063	0.886666295	0.918523987	0.962590515	0.934054054	0.924222336	0.997368689	0.806071957
P28285_5-HT1A	1.094459211	0.873849928	0.944387651	0.877734615	0.934164792	1.153956246	0.912886753	1.055572244	1.009912887	0.920997296	1.052267948	0.835686392	0.826725404	1.107195301	0.791116006	0.97907489	1.021659325	1	1	1	1	1.104480494	1.062186172	1.005793743	1.11568173	1.004441869	1.314702309	1.272579992	1.270959903	0.89509923	1	1	1	1	0.883996937	1.004594181	1.116577335	1.06297856	0.971860643	0.965735069	0.976454824	1.107405077	0.770505559	0.940423747	1.182178218	1.015445545	1.044752475	1.036435644	1.052631579
Q7JWP9_5819	1	1.049344516	1.067258367	1.204380751	1.038921912	1.084195098	1.136055121	1.166906623	1.181612505	1.289181407	1.137186343	1.201974496	0.895825727	1.150663259	1.105999757	1.038335159	1.103200682	1.104388679	1.277300332	1.043657614	1.151369314	1.094280955	1.062965019	1.197001666	1.226762909	1.098167685	1.144499179	1.114310976	1.221927498	1.106648141	0.770120724	0.926559356	0.954225352	1.080985915	1.084691301	1.044908576	1.01269987	1.057455436	1.032132201	1.044143524	1.080024482	1.096298759	1.230164007	1.204787234	1.328452711	1.229916898	0.938266719	1.202216066	1.160831141
B7Z0Q1_5PtaseI	1.025419212	0.873838921	0.892328798	0.903670887	0.960407546	0.981955768	0.911280473	0.93219503	0.990335384	0.965909625	0.975938278	0.92981117	0.987376673	1.025949453	0.988403838	1.114637113	0.989566158	1.018002386	0.898323874	0.986925978	0.972827724	0.97434442	0.962847914	0.880267082	1.007399457	0.950360685	1.00826782	1.03125	1.152843291	0.897222222	0.916272825	0.928732546	0.922046187	0.969172932	0.966180174	0.954581006	0.951624509	0.972930061	0.981823017	0.92042486	0.907144086	0.930233179	0.860395132	0.912871604	0.985615636	1.011807939	0.913055769	1.006582401	0.960417684
Q9VGH2_6959	1.175220859	0.845488036	0.943238313	0.966307808	1.241818377	1.071569083	1.049089069	0.907287449	0.976417004	0.881680162	1.030060729	1.205668016	1.51510277	1.166219839	0.84253798	0.888114388	0.951027703	1.086591509	0.989925642	1.000479731	1.02326697	1.197519797	1.178694158	0.976692066	1.063200359	0.988644853	1.024771055	1.036030626	1.294700495	0.966821799	0.925856026	1.02480453	0.990563494	1.186033971	1.046240888	0.989337395	0.994995104	0.844195409	1.01980198	1.091502557	0.752366445	1.200029546	0.932486335	0.950214212	1.064532447	0.979115479	0.782555283	0.971383148	0.985454545
Q59E04_7B2	1.231999528	0.84832389	0.808427762	0.877065628	1.15480406	1.050578376	0.790088255	0.924643585	0.962253904	0.869110659	1.024168364	1.007739308	1.887201735	1.446854664	1.470715835	1.444685466	0.863340564	1.032111206	0.924487071	1.159706204	1.254704383	1.123548868	0.926584085	0.928140606	1.102276412	0.95401777	1.04292884	1.097105216	1.481627532	0.875694569	0.863151829	0.763756842	0.907519447	1.000864304	0.948025614	1.12203842	1.213767343	1.006830309	1.068783351	1.082817503	1.116808965	1.008798344	0.962736426	0.925708102	1.04641736	0.943921246	0.824631983	0.971899668	1.1054634
Q8IQU7_825-Oak	1.09445853	1.05498008	1.057950018	1.171097428	1.152553423	1.2415067	1.082978723	1.092021277	0.958244681	1.055053191	0.923138298	1.089228723	1.086084542	1.048596112	1.00046282	1.015427337	1.060166615	0.886829268	0.839349593	0.962601626	0.927317073	1.123993559	1.05561749	0.737643999	1.002601263	1.016722408	1.019768234	1.221248418	1.3848476	1.073911773	0.935672515	1.058479532	0.944054581	1.104288499	1.102867871	1.080662912	1.159966337	1.019615459	1.202304655	1.251051984	1.043503593	1.086098542	0.913775767	0.996983409	1.226042379	1.01975393	1.065481887	1.157074504	1.15855181
Q27377_a10	0.933887158	0.812737972	0.851851852	1.009691935	1.033229491	1.468674282	0.667260844	2.456030897	0.749851456	1.498514557	1.232026144	0.983363042	0.842201	0.712824011	1.384492951	1.848567531	0.760345612	1.570079523	1.01888668	1.123757455	0.972664016	1.230543319	1.02349486	1.205580029	1.528634361	1.226138032	1.382234957	1.557020057	1.185673352	0.842979943	0.945872274	0.645833333	0.587616822	1.030957944	0.784497741	0.98783455	1.023288147	1.174834897	1.012513034	0.895724713	0.803614877	1.222412318	0.968349016	0.97433704	1	1	1	1	1
Q9VK43_A16	1.121244421	0.973286257	1.047098794	1.096395976	1.088801546	1.049563653	0.959764919	1.202305606	1.151220615	1.090076854	1.186482821	1.215641953	1.027981812	1.152325988	1.076250437	1.00996852	1.161944736	1.043650794	1.174603175	1.556878307	1.104497354	1.263954588	1.290444655	1.126773888	1.355723746	0.832544939	1.034911526	1.054359955	1.122588873	0.939662044	0.788712522	0.881128748	0.797530864	0.994003527	0.993461165	1.023239374	0.926482283	0.871432358	1.01404966	1.155429884	0.862596094	1.126288972	0.833434429	0.917627078	0.895394097	0.911449886	0.976646124	0.996756406	1.11555783
Q9W302_AAF46535	1.061062007	0.839686931	0.90122124	0.96241819	1.221577491	1.135550907	0.937040205	1.117878529	1.051668092	1.036612489	1.061933276	1.154662104	1.087402689	1.217799009	1.08138712	1.232661005	1.080325548	1.008141382	0.907267673	1.129467832	0.99692216	1.14754902	0.968627451	0.835947712	1.040196078	0.890196078	0.942282384	1.102838879	1.212069938	0.867456289	0.964939659	1.091968373	0.997607158	1.099875156	0.923970121	1.01368242	1.135862732	0.940315065	1.080171585	1.113822942	0.897788625	1.090204122	0.88848309	0.909295577	0.872032193	0.930482897	0.873943662	0.896981891	1.179966611
B7Z0B3_AAF47782	1.086438028	0.769456896	0.774001876	0.829229647	1.097612843	0.855999166	0.744826921	0.932272683	1.005881786	0.735686048	1.060148491	1.032359464	0.997773581	1.070788192	0.793459895	0.841347779	0.781950104	0.780284503	0.773212684	1.049849189	1.091627945	0.976136043	0.786978172	0.893927531	1.041370455	0.831543015	0.92499675	0.89743923	1.101650851	0.816326531	0.730671227	0.964189825	0.700111159	0.797383497	0.76434589	1.05604435	1.044770076	0.777068378	1.055156734	1.075353878	0.750066182	0.961926277	0.727918894	0.756901207	1.034860891	0.760882279	0.688173615	0.879375888	0.780554748
M9PB12_AAF51252	1.17968316	1.357799898	1.083464794	1.237607483	1.103861622	0.921912147	0.877573808	0.934301041	1.368801193	1.02576736	0.993565968	0.809969626	0.900208161	1.366435775	1.220722822	1.103865341	1.307719915	1.262393378	1.47584275	1.223033584	1.621352806	0.931563205	0.905444923	1.541957148	1.352224335	1.484339037	1.156886544	1.033203946	1.567711776	1.140350666	1.26711093	1.320960889	1.286637178	1.036942731	0.925617442	1.231808891	1.271265542	1.128708908	1.315278487	1.125745188	1.288460228	0.77501082	1.623832195	1.578059517	1.226876109	0.92512165	1.420852225	0.803803575	1.129987026
Q94521_AANAT1	1.064583158	0.975081912	0.892598505	0.923111821	1.022812176	1.041653365	0.926312518	1.048293689	0.973931566	1.05889844	0.998355089	0.983929898	0.945721517	1.006551264	1.048837061	1.049008727	0.953570259	0.998439112	0.998508485	0.956798099	0.959651055	0.963588675	0.919617947	1.002307412	1.0635064	1.038799156	1.002808538	1.039059168	0.934240338	0.91938888	1.053044463	0.957113188	1.006853583	1.072887756	0.894566363	0.976228183	0.978462999	1.090225854	0.976774471	0.938479111	1.056052488	0.965613944	0.987389613	1.007247723	1.171291413	1.076059596	1.01494702	1.075622093	1.094005473
Q9VMG0_AANATL2	0.762485303	1.270055169	1.461608031	1.333074071	0.819842634	0.804847608	1.534076062	0.7607668	0.576810699	0.876998361	0.556761764	0.790816448	0.781911959	0.483603215	0.934220943	0.929255128	1.316852585	0.925369686	1.065743637	0.786577563	0.671921655	0.805679158	1.52022943	1.116669667	0.768023869	1.308289822	1.032038225	0.969370467	0.936532714	1.133692486	1.014910044	0.75545403	1.258039382	0.943405582	1.580730715	0.572804731	0.491197586	1.027329401	0.668343317	0.736811621	1.079656134	0.837375772	1.222013047	1.246574143	0.604695179	0.887750697	1.09818701	0.752789215	0.906758396
Q9W4Y1_AANATL7	1.061065519	0.940656532	0.893327055	0.894241894	1.019130903	1.036297592	0.793965111	1.055494438	1.178898842	0.981001275	1.080744582	0.941694169	0.93787203	1.027308451	1.071794532	1.075608098	1.028286714	0.952088282	0.775785868	1.387961991	1.085920667	1.011671098	0.915927497	0.988755151	1.058091623	1.019688635	1.064964977	1.084976087	1.236122966	0.932216938	0.981409927	1.095084979	0.943905536	1.136966684	0.892181134	1.000235036	1.002930116	0.971482294	1.007944218	0.945738013	0.922203071	0.944356819	0.882209467	0.915185613	1.118339246	1.102198883	0.906301591	1.130352313	1.037866378
Q9VM95_Aatf	1.133807706	1.002429712	1.140923291	1.082263103	1.199409927	1.068205484	0.785542169	0.601204819	1.007228916	1.218072289	1.215662651	1.101204819	1.316761364	1.590909091	1.298295455	1.693181818	1.296875	1	1	1	1	0.921509107	1.043798786	0.967042498	1.056374675	1.107979185	1.077267182	1.120374136	1.16653111	1.041683611	1.086508507	1.182602444	1.068056554	1.009345794	1.19976922	1.128660032	1.108466753	0.901918361	1.221549113	1.136881581	1.029424492	1.169325357	0.751910934	0.817879694	1.415902541	1.014409222	1.042310715	1.107152214	1.151742627
Q9VSY6_aay	1.105224243	0.786488371	0.975896233	0.902613178	1.032046813	1.315947356	1.175649968	1.241695527	1.017218672	1.134017853	0.852153553	1.127164529	1.089323579	1.075187306	0.799529969	1.105191547	0.893712892	0.891803149	0.90930849	1.065590632	0.988824274	1.109848295	0.93358534	0.974465528	0.901341811	0.696590397	0.974380285	1.16594635	1.023687327	0.843050678	0.918005817	0.946267517	0.924821528	1.013690179	1.00840057	1.092113232	1.278938012	0.795592631	1.023482525	0.931193467	0.891046555	1.046507493	0.870931039	0.780369429	0.865539076	1.06849121	0.874236822	1.195075999	0.975715127
Q9VRG4_ABCA	0.962184874	0.903721489	0.994357743	1.045738295	1.096638655	1.111284514	0.978156792	1.057600239	1.000897666	0.975314183	1.019748654	1.100239378	1.377770201	1.101602455	0.990453461	1.188885101	1.104330038	1	1	1	1	1.002852615	1.083993661	0.941362916	0.924564184	0.816798732	1.161693725	1.091926283	1.202720491	0.970820535	1.134611583	1.098240759	1.04388219	1.046847203	1.083967678	0.970956787	0.890268181	0.978451809	0.972244994	0.993676074	0.971425225	1.15649979	0.706352545	0.806689104	0.815463166	1.035740336	0.803792852	1.035010941	1.099940863
Q7KVB1_ABCB7	0.967306529	0.942060157	0.825786773	0.901020298	0.94239998	1.403904651	0.846550084	1.159128363	1.103017205	1.1031255	1.162066465	0.888243825	0.889397324	1.068917913	1.146687762	1.296850117	1.038830634	1.193078719	1.046404166	0.957678049	1.026621532	0.869186088	0.862021051	1.04661055	1.007963778	0.956305563	1.245289997	1.314161319	1.243819106	1.042958424	1.083863711	1.042961761	0.938424008	1.085980475	0.902877462	1.105985416	1.102183524	1.133201545	0.990078991	0.962247668	1.034176011	0.808415335	0.982435721	1.015530397	1.014366651	1.357576501	1.054665827	1.328704494	1.199092604
Q7JUN3_ABCD	1.073932717	1.001849302	1.000078694	1.053236278	1.078024789	1.049301594	0.989377982	0.934017463	0.952380952	0.865874516	0.952651004	0.999189846	1.003489371	0.988726648	0.962314795	1.048475413	0.965857848	0.963899491	0.907919847	0.958492366	1.103530534	1.172319746	1.126549638	0.963850045	0.988941783	1.028265397	1.04087646	1.006696668	1.10130719	0.970695382	1.105350615	1.161515454	0.966877146	1.031018057	1.082950935	1.05901229	1.055289927	1.020569265	1.030099798	1.061707794	0.98260758	1.011565175	0.962332418	0.968244225	0.878355395	1.070250684	0.983509576	0.883309916	0.916197588
A0A0B4KH51_Abi	1.012339721	0.944849775	1.016115448	0.976115448	1.009661699	0.908862077	1.095191715	1.00729873	0.92653187	0.933731969	0.939390951	1.061163852	1.12552375	0.920629129	0.952135892	0.97109783	1.049411765	0.935730538	0.885268724	1.038171032	0.993454613	1.12075534	1.070164387	0.929685625	1.11037617	1.029922606	0.953169146	0.955654083	1.123923478	0.997668244	0.904732179	0.923741442	0.984192509	1.037051953	1.057767972	0.930851259	0.884022798	0.898694613	0.988269903	1.013816878	0.92001287	1.047856245	0.87913621	0.92120569	1.014036461	0.884949484	0.897466726	0.942549305	0.918448
Q9VFR1_abitram	0.960569777	1.023947151	1.009289843	1.083195706	0.977704377	0.82535095	1.038197845	1.10920666	1.049951028	1.310479922	1.13467189	1.125857003	1	1	1	1	1	1.086194564	0.894134478	0.945636624	1.144849785	1.139463935	1.045325779	1.087600784	0.99455219	1.039877969	1.130385965	1.010526316	1.216140351	0.977403509	0.994941176	1.025529412	1.045764706	1.158117647	1.097493992	1.136285616	1.021627188	1.105732921	1.146927566	1.153450051	0.998626845	1.154450262	0.97434555	1.087958115	1.064139942	1.008260447	0.978620019	0.929543246	1.06551549
M9PCT8_Abl	1.144063775	0.88579292	0.967580905	0.929429629	1.110486856	1.017253488	1.06336079	0.911294894	1.032414046	0.984726715	1.028412312	1.15756828	1.117970468	0.980953503	0.880262331	1.006676092	1.020460258	1.049253984	0.822227874	1.119023398	1.02110885	1.236667565	1.120949043	0.961984362	1.118037207	1.08600701	1.040734317	1.038217503	1.155852121	0.964447358	0.874056839	1.032940003	0.886089413	0.991125145	1.061859512	1.045628636	1.044510693	0.911641099	1.067345714	1.091257272	0.886197545	1.126975367	0.896829378	0.918953494	1.334868177	1.068325288	0.7997772	1.009481371	0.952067004
Q9VU84_Abp1	1.05468239	0.930043273	1.08472236	1.016542794	1.101958841	0.874330261	1.084767298	0.927459961	0.987121771	0.885123371	0.927883484	1.229878747	1.18987033	0.907682636	0.860984443	0.916014562	1.02004166	0.898990263	0.824831786	1.110962988	0.999459552	1.251309937	1.175742738	0.896901026	1.065166893	1.039443293	0.937749615	0.918959716	1.15072801	0.96216076	0.8336755	0.970626323	0.961803691	0.972310835	1.129388072	0.973054461	0.961776806	0.869915705	1.066405823	1.13265629	0.891159124	1.217931106	0.848423492	0.906086628	1.069397647	0.951276028	0.830167622	0.956951988	0.923044407
Q9V3C0_abs	1.073930148	1.079783151	1.133563615	1.1236327	1.034974093	0.979754366	1.154183517	0.864270661	0.974255283	0.905564732	0.914620949	1.179529532	1.1088515	1.010972933	0.953182151	1.046305779	1.021726408	0.895896749	0.979301108	1.246438573	1.048094484	1.12960697	1.139004454	1.008712251	1.099163037	1.147374088	1.070205479	1.055308219	1.179452055	1.053253425	0.962703963	1.0746892	1.04477467	1.022921523	1.206960903	1.06429038	1.000373239	0.984323971	1.119623029	1.118596622	1.02281422	1.146576282	0.938383625	0.952785398	1.062027454	0.922887763	0.961205315	0.993907363	0.926003108
Q0E8E1_AC	1.059719934	0.969522241	0.936367381	1.064662273	1.061573311	1.237026359	1.080066262	1.130866924	1.051905025	1.248481502	1.014356709	1.031474324	1.012444444	0.873777778	0.953777778	1.168888889	1.020444444	1.02566586	1.02905569	1.014043584	0.958837772	0.95376156	1.048612847	1.038115471	0.922019495	0.989877531	1.18735363	1.388424222	1.447975912	1.116092339	1.170686456	0.980519481	0.752319109	1.331168831	1.038544474	1.034591195	0.951662174	1.084007188	0.999371069	1.013297394	0.961185984	0.628532361	1.093892434	0.932087511	1.005776173	1.150300842	0.930926594	1.13898917	1.148541114
M9PEP2_Ac13E	1.043662286	0.943862776	0.898418356	0.974159055	1.136333259	1.114724883	0.826568266	1.097076355	0.963099631	1.177121771	0.986942946	0.968208913	1.406534954	1.070668693	1.376139818	1.005319149	1.015197568	0.980483271	0.799256506	0.905204461	1.151486989	1.325667656	1.018545994	1.002967359	1.485163205	1	1.226096738	1.221222347	1.318710161	0.997750281	1	1	1	1	1	1	1	1	1	1	1	1.203310795	1.053159245	1.028211704	0.873651772	0.697226502	0.801232666	0.976887519	0.825438367
Q9V9R3_Ac3	1.092342918	0.899111198	0.898099829	0.847869733	1.057080338	1.115341234	0.927139641	0.935843878	1.106882728	0.933351793	1.142951735	1.075918279	1.068844217	1.07638572	1.05003609	1.113039583	1.019446956	1.078586835	0.919246285	1.173969484	1.080534031	1.04760984	1.000304905	0.924859446	1.090549424	0.966914061	1.059271958	1.101223939	1.243873124	0.915440015	0.93408492	1.088186566	0.938700159	1.026239803	0.967774703	1.073699215	1.004785836	0.987557492	1.032221967	0.964570823	0.935592701	0.984341913	0.934308974	0.948614183	1.098450871	1.112636017	0.935360103	0.992787376	1.059765839
Q9VW60_Ac76E	0.918330826	1.001647003	0.930319107	0.945395518	0.94778684	1.119692771	0.853907057	1.030740103	0.900791738	0.961273666	1.082822719	0.959070568	0.93899035	1.12701704	1.041364277	1.153627349	1.004864822	1.057389995	0.953775803	0.912950856	0.953316683	0.86181809	0.930820935	1.009918687	0.909850716	1.005034866	1.111872441	1.167097608	1.190196078	0.937125619	1.043426488	0.878353738	0.962229747	0.94916831	0.926849455	1.019905776	0.952336488	1.056343109	0.945588048	0.942532151	0.968464836	0.854332719	1.003885349	0.997646589	0.99218578	1.16657495	0.982115342	1.220283953	1.137916838
M9PD54_Ac78C	1.348484848	0.999494949	1.057828283	1.01540404	1.127020202	1.184090909	1.007955936	0.993574051	1.181762546	1.116585067	1.17870257	0.942778458	1.178608089	0.94847054	1.083350441	1.215150893	1.141859988	1.260692859	1.069672924	1.06560867	1.072769499	1.067741935	1.004301075	1.137634409	1.106451613	1.035483871	1.179086044	1.238781392	1.376286538	0.996706464	0.887147335	1.075626959	0.89145768	0.982758621	1.037735849	1.267216981	1.198113208	1.016745283	1.172641509	1.085613208	1.083962264	0.766293614	0.581303489	0.630678078	1.097105509	1.131963897	1.028011204	1.26984127	1.212653953
Q8MYW9_ACAT	1.023947977	1.501844557	1.157693991	1.430876008	1.089414119	1.119989996	1.148528405	0.918548939	0.93908282	1.065708419	0.937713895	1.2183436	0.989330747	0.916585839	1.027158099	0.987714193	1.301325574	1.388401987	1.440549226	1.040753725	1.166666667	0.909343329	1.13050118	1.630292933	1.071081494	1.503956685	1.332293292	1.256630265	1.179336264	1.216777762	1.546242775	1.119039017	1.367593931	1.177926301	1.348837209	1.020522988	0.934197835	1.465759297	1.033061837	1.063658772	1.509806023	0.967242751	1.47899342	1.494178899	0.825764684	1.277068868	1.640645524	0.859448302	1.409146235
Q9VLS4_Acbp1	1.035854744	1.048271436	1.064102866	1.096024775	1.017762523	0.981760592	1.05846643	1.042047741	0.967664373	1.076286048	0.96519536	1.039081944	0.989448581	0.919808245	1.035002677	0.99107899	1.087969047	1.0204054	1.023101786	1.027169914	1.062058084	1.034277427	1.05793476	0.972651724	1.109623309	1.076036495	1.016005367	1.03130391	1.12874976	1.07359354	1.048972332	0.917764972	1.115605843	1.004027419	1.049557656	1.026456539	1.002859257	0.992717304	1.054771596	1.071565527	1.010865178	0.997130719	0.996679302	1.023529339	1.118647575	0.969231854	1.061371705	0.97808187	1.042531999
P42281_Acbp2	1.462908231	1.187293246	1.125075323	1.308240657	1.359460379	0.657526778	1.053351194	0.705417085	1.501602641	0.919370425	0.979690316	0.990068411	1.164415411	1.316031735	0.866987361	0.786627108	1.222023038	0.852909611	1.080302383	1.4478921	1.757652932	1.237420997	1.075261853	1.220389932	1.606588204	1.342689327	0.978306098	0.804138046	1.418342063	1.108291775	0.962026051	1.674884991	1.086696611	0.907593702	1.067897397	1.491656393	1.483363715	1.004808418	1.577361446	1.420099119	1.021748522	1.344258861	0.960124422	1.075588909	1.27336756	0.66821699	1.099174694	0.569943968	0.892736056
Q9VSP9_Acbp5	0.513036281	0.323262979	0.278475192	0.459879524	0.389616959	0.315353842	0.410834995	0.500072947	1.055488012	0.318046978	0.597043233	0.410105529	0.839050734	0.864531832	0.613371872	0.706853275	1.057275424	0.721987528	0.668276001	0.760611547	0.813518407	0.432067948	0.333873634	7.166110157	0.648037086	0.52526988	1.988997434	0.363232682	0.462601145	0.561624235	1	1	1	1	0.34652361	1.935465024	0.619642004	0.324905721	0.415679609	1.80873214	0.339565518	0.483301789	0.577049881	0.473411075	0.446720368	0.461219793	0.331070196	0.525546605	0.424786325
A1Z784_ACC	1.112030442	1.449785882	1.550204576	1.464639985	1.185583113	0.892827757	1.43685867	0.720150353	1.295244456	1.154313904	0.937934768	1.046785333	1.027713307	1.171409653	1.144483472	0.924401566	1.436959304	1.128682149	1.597857361	1.185224907	1.403082876	1.236972393	1.477269778	1.376957168	1.269268119	1.27403757	1.193332763	0.937620297	1.247420024	1.609699399	1.404101412	1.425205597	1.541915139	1.063327852	1.605451598	1.168942264	1.295418367	1.222840624	1.250497393	1.214204739	1.3499538	1.117059918	1.457109976	1.466720216	0.922562394	0.8461136	1.485425545	0.616007821	1.23426048
Q9VP61_AcCoAS	1.108100252	1.364185505	1.126420315	1.225445314	1.040938991	1.04392063	0.980814398	0.816355072	1.166821895	1.042412413	1.001122393	0.803495058	0.808444631	1.185849751	1.167967983	1.019182423	1.40241519	1.077516386	1.422272995	1.08413145	1.294070452	0.860641197	1.018233098	1.300607173	1.138232875	1.40979759	1.10955628	1.007231479	1.164907653	1.345648129	1.310905158	1.317307804	1.401806049	1.010761605	1.084626078	1.139990404	1.194610454	1.192647041	1.168133896	1.025455485	1.353612509	0.785033064	1.473935481	1.496791922	1.052146353	0.96232235	1.347415625	0.854435715	1.156659296
A0A0B4KGI5_Ace	0.936458022	1.025710758	0.940698033	0.883468005	0.918081269	1.062006365	0.873194291	0.921763378	0.851466847	0.904517687	0.919572811	0.83349959	0.838126777	0.912674815	1.007382035	1.027745878	1.020903923	1.042857311	0.90139875	0.955585579	0.937200499	0.851979842	0.924114332	0.963943652	0.890603167	1.051615622	0.887150012	1.017775938	0.677679126	0.936893328	0.962310082	0.887305983	0.931387998	0.997886759	0.88938956	0.887971541	0.895718768	1.047943378	0.861463969	0.856523135	1.02489439	0.881797331	0.993719846	1.018175571	0.890401731	1.009046192	0.897832201	1.063068714	0.968137664
M9PCE8_Acer	0.986707184	0.941755616	0.887114622	0.898611418	1.000907941	0.998691998	0.862636853	1.03414479	0.958551351	1.193008734	1.038387841	0.959488129	0.903556328	0.84996332	0.887398672	1.031566483	0.955335101	0.911723425	0.980048344	1.041267861	1.022381853	0.867555963	0.896392342	0.973199348	0.888077363	0.974734747	0.89339635	0.960979955	0.977073986	0.912540834	1.027921869	0.975001082	0.932781755	1.050817513	0.906076195	0.946752379	0.951841195	1.133038467	0.952802944	0.902031035	1.004359578	0.964661801	1.033367073	1.04458118	1.10351225	0.955903491	1.065025977	0.97548745	0.914598765
Q9VZI2_Ack	0.974988933	1.081673307	1.208809208	1.024037185	1.011863656	0.98583444	1.194966986	0.982808023	1.028715585	1.029463062	1.04378971	1.20761181	1.094222222	1.628444444	1.127111111	1.215111111	1.034666667	1.063754427	0.860516107	1.108618654	0.931017035	1.077511096	1.062140391	0.998273878	1.056962025	0.991780372	1.079357922	1.098115249	1.253133736	0.975200649	0.886347966	0.911399678	0.904045047	0.958860032	1.134405588	1.028243715	1.057953516	0.998878875	1.039584322	1.076495192	1.000474322	1.116660087	0.907224635	0.977694433	0.961981424	1.057585139	0.939318885	1.026625387	1.18196921
Q9I7F7_Ack-like	1.097590361	1.051405622	1.040160643	1.063855422	1.100401606	1.019678715	1.046441272	0.672416538	1.034764609	1.130566318	1.001326893	0.982325779	1.036312014	0.983562463	0.834578601	0.966228332	1.120890616	1.047882415	1.02651716	1.093491931	1.06992954	1.180257511	0.765379113	0.60658083	0.878397711	0.905579399	1.129939151	1.211430332	1.173534622	1.038049757	1.012851969	1.068699614	0.845776376	1.000116836	1.117681026	1.109481464	1.079685876	0.982215036	1.105208454	1.192862917	0.951842014	1.001909612	1.010566518	1.053214513	1.046588469	1.137122088	0.917726747	1.008921196	0.910218042
Q9VJ12_Acn	1.05286	1.019827143	1.181081181	1.076501891	1.043081723	0.831196048	1.188382018	0.796247458	0.831961025	0.834175508	0.74088539	1.107523202	1.164896902	0.841846797	0.881512103	0.848022711	1.090895508	0.891489226	0.883339549	1.059749143	0.935502942	1.388727499	1.327134269	0.938675443	1.054826034	1.080526263	0.876905852	0.856609697	1.078133061	1.0159164	0.825186569	0.914380394	1.017898036	0.909791384	1.230250661	0.883558924	0.845976451	0.848172549	1.032329061	1.080394437	0.932925691	1.199388518	0.91937387	0.953865648	1.048102944	0.835730459	0.916299142	0.812298322	0.888409847
Q9W2G8_Acox57D-d	0.872421495	1.822099593	1.716752069	1.843332019	1.006989883	1.294573643	1.620331781	1.002369862	0.842199886	1.741113018	0.93846531	0.817112037	0.933622829	0.871588089	1.095533499	1.149193548	1.318858561	1.240277612	1.791252842	1.132463803	1.124985042	0.855805112	1.804196297	1.783707667	0.860311202	1.52812786	1.31827541	1.28196169	1.022961253	1.456042928	1.619575254	1.013296399	1.691043398	1.528531856	1.746838599	0.957076194	1.095572258	1.48740783	0.936522637	1.093506216	1.593239055	0.787743775	2.059753552	1.929680737	1.007209936	1.235807331	1.71408664	0.991941836	1.474821244
Q9W2G9_Acox57D-p	0.9584069	1.000839388	1.00625199	1.079915482	0.964485224	1.129931402	0.969439052	0.886466577	0.944651834	0.968045393	0.95537803	0.985018167	1.106919668	1.067719577	0.941483922	1.129530735	1.056243609	0.839871083	0.879691277	1.065985327	0.932233578	0.970795256	0.982772701	1.468014777	0.980867198	0.976589539	1.107551403	1.068893221	1.139257733	1.027145327	0.914077187	0.912750194	1.009067787	1.034280659	1.074018485	1.00060563	1.064986702	1.063959765	0.970745451	1.078415883	0.994680991	1.070241393	1.077727213	1.063085345	0.987076923	1.084192308	1.0605	0.994192308	1.155221435
Q26416_Acp1	1.327052248	0.880249192	1.054965903	1.080526073	1.195046916	0.860483003	1.201993755	0.898690848	1.023828969	0.894018736	1.057722796	1.401597406	1.327678594	0.999033928	0.875479816	0.906806296	0.983512379	0.929154648	0.863357	1.204470823	1.156190371	1.442276951	1.166842775	0.703324392	1.235240727	0.972201902	0.939390327	0.969689745	1.208801569	0.955103545	0.787522463	1.071857024	0.946983187	0.883241567	1.189609095	1.03870544	1.019907596	0.851247905	1.221995742	1.224283191	0.861983059	1.423452153	0.794959015	0.855361066	1.333958078	0.892845602	0.855188608	0.965186669	0.860924875
P91941_Acp65Aa	1.040828874	0.857791476	0.868469827	0.957560397	1.058520817	0.943082891	0.891739181	1.055716147	0.964679978	0.959559963	0.966914052	1.008677433	1.052502861	0.977837382	0.969367533	0.994999727	0.993683561	0.977834053	0.850810591	1.057456151	1.04911601	1.03225365	0.94217741	0.895377748	1.066040142	0.957437409	0.985046545	0.990134933	1.145890736	0.906359147	0.861195025	0.959273208	0.913550016	1.008320432	0.917217146	0.990302301	0.951800514	0.855951088	1.029852279	0.987294902	0.865923128	0.997984513	0.855435056	0.875407933	1.042367634	0.953394707	0.908489653	1.010737992	0.963428809
Q9VAD0_Acph-1	1.086138517	0.948572552	1.521387132	1.089186797	1.097118883	0.846635419	1.387536937	0.935424996	0.913088823	0.808621589	0.906135929	1.370415435	1.463386284	0.933884984	0.801627276	0.862318038	1.10411247	0.796683919	0.822974397	0.937800577	0.853020657	1.460533349	1.639543862	1.002791471	0.969828354	1.017936687	0.889442651	0.853572933	1.304295943	0.951109083	0.782946321	0.878769602	1.135856454	0.789430036	1.400140334	1.020091217	1.009659689	0.824675477	0.984867267	1.331189335	0.821471173	1.719174679	0.859105123	0.874419148	1.016407155	0.81385922	0.829655128	0.820132544	0.819121083
A1Z7H3_Acsl	0.929036568	1.247753454	0.95684384	1.190813683	0.931822779	1.077020453	0.971277148	0.81018348	0.992031448	1.474006482	0.864022811	0.760098615	0.766877741	1.067729639	1.649911775	1.218944053	1.272939438	1.432794916	1.621262853	0.888134139	1.012991268	0.796867466	0.96450997	1.516789946	0.971717878	1.263960534	1.402454045	1.056604141	0.963157419	1.337039124	1.650870815	0.969566843	1.372864252	1.287137599	0.945126347	0.972121493	0.95832679	1.527876722	0.893705832	0.870720608	1.474514598	0.767282876	1.416197963	1.373141499	0.931579923	1.166263162	1.556207378	0.847443856	1.401276163
M9PCX4_ACSL1	1.091683204	1.166338446	1.111121758	1.250530154	1.073757574	0.980349637	1.169169874	0.931682859	1.156084693	1.093310736	1.026373057	1.157706265	1.124148715	1.070905886	1.050831458	1.041542379	1.165662196	1.043172712	1.16453033	1.13717874	1.124263611	1.088886288	1.176166721	1.109279137	1.105253995	1.158967571	1.102897106	1.064939075	1.250014262	1.173578042	1.13273127	1.17634837	1.231991972	1.061850163	1.192493261	1.098771551	1.047802801	1.200246297	1.071878682	1.079710108	1.169808172	1.057601836	1.233158775	1.210629753	1.009363586	1.015410901	1.188670869	0.94896218	1.05703601
P53501_Act57B	0.913794537	0.846196689	0.916400309	0.868808582	0.974668606	0.971775212	0.996854208	0.913254433	0.894844132	0.927218867	1.017319751	1.096191963	1.040285419	1.013571505	0.906454205	0.995725893	0.885210213	0.961738258	0.904635694	1.022726626	0.913662935	1.000248658	0.919104765	0.878828403	0.968651669	0.806825417	1.023981272	0.929401182	0.943195	0.882453714	0.880948955	0.941064796	0.879998295	0.934786004	0.970148297	1.038482979	0.978377764	0.948169213	1.025816314	0.989292539	0.928525507	0.980722411	0.937228466	0.880457082	0.944219654	0.978678838	0.892680137	0.954744394	0.961077199
P10987_Act5C	0.988421954	1.062820188	1.064893039	0.998260156	0.96201542	0.976489183	1.083428318	0.923397018	1.010072912	0.917670792	0.958602457	1.062407277	1.097464201	0.974589517	0.989216437	1.015066272	1.072953806	0.971958301	0.907679511	1.059500693	0.98550975	1.112594765	1.104906617	1.000207788	1.03202353	1.047565251	1.012916146	1.017595441	1.09672805	0.991187733	0.967990484	0.972031957	1.038057808	0.970278553	1.027304372	0.961071369	0.926908263	1.051273088	0.95565935	0.980293513	1.063567005	0.963974844	1.133355069	1.095899469	0.905417454	0.941848291	0.999211966	0.974401853	0.918074269
P02574_Act79B	0.939738307	0.563753343	0.468683583	0.768445023	0.538711776	0.719417335	0.478340464	0.738639605	0.717414519	0.488064206	2.90970716	0.604682784	0.525759718	0.792027961	0.856188469	0.59627011	0.760716096	0.578381123	2.135321757	0.803536145	0.578270166	0.522632983	0.684555119	2.337512965	0.554304341	0.503093051	0.574925521	0.42443455	0.785698921	0.406489637	1.675645529	1.902357585	0.803020317	0.555419549	0.381054774	1.114530025	0.947992374	0.818668559	0.47358047	1.685416935	3.291102223	0.61747504	1.060908608	0.459717396	0.908582278	0.914126582	1.999696203	0.596044304	0.402211854
P83967_Act88F	0.972466469	0.790066229	0.798316619	0.899453734	0.9265307	0.832338739	0.872371458	0.853821465	1.014877941	0.742802144	2.361920535	0.978200892	0.891196756	0.898155356	0.841194041	0.817878025	0.833609095	0.830809096	1.020859042	0.953721525	0.909933291	0.961094533	0.919900509	0.997946592	0.916134823	0.836035332	0.832951406	0.820083667	0.930278628	0.698512982	0.925914678	1.14495573	0.808459467	0.823387618	0.872582078	1.066591552	0.882056385	0.828833311	0.962612672	1.15668794	1.114131686	0.952086335	0.845617415	0.837428518	0.946897098	0.895882182	1.023051368	0.844836333	0.842414922
M9MS06_Actn	1.037761555	0.920736329	0.939391209	0.990965395	1.07755171	1.003408905	0.978927867	0.948236613	0.998060963	0.967591186	1.18849064	1.095683658	1.083057084	1.032048937	0.908415075	0.90699714	0.841301122	0.930017739	0.942649945	1.042991577	0.965725379	1.013373429	0.972135428	0.926766743	0.987036093	0.849931584	0.940145071	0.979211707	0.849922393	0.941809525	0.912603683	1.029079323	0.895679653	0.956623603	0.969080838	1.035891446	1.022326505	0.937965272	0.996104007	1.007296393	0.960810283	1.030625196	0.913759653	0.885326366	1.036736117	1.013219066	0.946399846	1.020651767	0.94067584
A0A0B4KG16_Acyp2	1.150938753	0.893291611	0.876626116	1.193903382	1.21619436	0.919942339	1.149994143	0.862070985	1.143551599	1.257291789	0.850825817	0.899964859	1.182878496	0.784169403	0.837730721	0.801494734	0.693466199	1.069007398	1.035000552	1.227448382	1.29226013	0.912966167	1.023885044	0.88268935	1.188917724	1.018838908	0.95039804	0.948171241	1.605578133	0.99988866	0.813716558	1.061542284	0.843783649	1.125238135	1.081444165	1.132241814	1.030086762	0.964805486	1.292891128	1.225160929	0.924993003	1.05948492	0.976980931	0.941426726	1.11125158	0.974440719	0.969823559	1.015005771	1.019488787
Q9VHH7_Ada	1.6473397	0.799181446	0.875443383	0.900818554	1.319099591	0.946248295	1.209684211	1.310315789	1.202947368	1.279157895	1.125894737	1.072421053	1.016194332	1.168690958	1.115384615	1.17611336	1.071862348	1	1	1	1	1	1	1	1	1	0.895067698	1.058510638	1.316247582	1.063829787	1	1	1	1	0.986875	1.9275	1.185833333	0.872708333	1.01125	0.932916667	0.730208333	0.783283709	0.947681838	0.749468311	0.824801487	0.808075688	0.822267275	0.851326238	1.308339173
Q9NII1_Adar	1.12588392	0.952823421	1.319987702	1.090014689	1.164861818	0.844532504	1.208131124	0.768061533	0.943411775	0.80065928	1.002014468	1.255287977	1.354084466	0.967886892	0.852878854	0.907350577	0.982792635	1.05417256	0.925459689	1.211315417	1.050919378	1.503048056	1.469479851	0.843559496	1.300451271	1.033251524	0.918303785	0.894311726	1.139126566	1.057327675	0.857142857	1.065461984	1.07091715	1.036708717	1.359709251	0.959638841	0.871026528	0.830478991	1.125660088	1.147404171	0.85810433	1.500858399	0.90293229	0.915670924	0.942234199	0.858304753	0.90044096	0.899314062	0.936592514
Q9W133_Adck1	1.008264855	0.947513419	1.00284995	1.027359521	1.001804968	1.143827483	1.043183609	1.008825847	1.1892829	1.281166273	1.084475965	1.129078014	1.01654321	1.016049383	1.058518519	1.177777778	0.970617284	1.13215449	1.021715527	1.152474019	1.091050101	1.132217666	1.074143855	0.8962651	1.093427906	0.995123573	1.119472878	1.129979287	1.254855462	1.044457119	0.838322928	0.906498297	0.856271283	0.947715664	1.044374878	1.062062219	1.059205635	1.055175113	1.016552534	1.081471336	1.069536294	1.001071467	1.000214293	0.949533912	1.088118812	1.000990099	0.82970297	0.968316832	0.996068796
Q9VTG5_Adck5	1.002079685	0.928816404	0.972708698	0.987850263	1.065674256	1.172978692	0.961202283	1.068275062	1.058597931	1.001204067	1.050258651	0.995941848	1.014526492	0.955675575	0.968805289	1.148058478	0.981003818	0.994500218	0.99397643	1.090964644	0.931470973	1.049483051	0.941721105	0.871354354	0.986934828	0.897484697	1.045994227	1.076956593	1.152960078	0.955639671	0.951235768	1.106525965	1.001777284	1.068592058	1.024615501	1.076296743	1.028648975	0.986467129	1.086436972	1.048062425	0.94858263	1.060137274	0.975354742	1.028343824	1.034769432	1.053648947	0.999344746	1.155172414	1.047321158
A1Z8R2_ADD1	1.007308797	0.998868877	1.034194727	1.040198382	1.04889933	1.06569216	0.99328594	1.109399684	1.120063191	0.95300158	1.104265403	0.897709321	0.973585912	0.85058698	0.942636073	1.04135539	0.89941302	1	1	1	1	1	1	1	1	1	1.074088907	0.961553865	1.182619143	0.926311574	1	1	1	1	1.082843186	1.071179344	1.075366364	0.933805204	1.119130695	1.120426677	0.938191606	1.03350908	0.868306971	0.951728178	1.16192489	1.105999025	0.922451634	1.118517314	0.909246738
P05552_Adf1	1.057994768	0.964068459	0.993317994	0.986478394	1.064046396	1.09959971	0.96784097	0.996085655	1.026287512	0.992862077	1.005411006	1.043057794	1.042936328	0.971998047	0.982595709	1.007553347	0.963238462	1.023295411	0.923844904	1.033743518	1.031808684	1.177508438	1.151733661	1.06285159	1.107292626	1.051651836	1.031639257	1.029602122	1.161421751	0.939480106	0.904393284	1.041821655	0.962903388	0.992560571	1.06559457	0.996891553	0.965585054	0.930535731	1.064801599	1.004345482	0.91657944	1.0080503	0.922376307	0.95833823	1.028179191	1.015128251	0.889134754	0.981846098	0.972292773
Q9VVK5_Adgf-A	0.96237519	0.75327316	0.826952324	0.872346757	0.914980493	1.119999339	0.870208433	1.497664111	0.965590561	0.860415668	1.015572592	1.066123622	1.131409473	1.063055352	0.871036113	1.168297057	0.942487976	0.874114441	0.80198167	0.900520188	0.881743869	1.114510895	0.904126101	0.94121465	1.004543347	0.847519703	0.89731918	0.882965947	1.017646147	0.877949095	0.898060824	1.110469429	0.890855145	0.987231112	0.844167955	0.98927581	1.104984171	0.771552676	0.955017301	0.959925397	0.718471619	1.092394982	0.775935662	0.792800999	0.930161167	0.881946639	0.721728139	1.14751027	1.00189316
Q9VFS1_Adgf-D	1.011303671	0.937937733	0.9774381	0.906792995	1.035399235	1.109037825	0.94169066	1.026921032	0.990112614	0.994683459	1.040025961	1.02376563	1.015826139	1.025745785	1.061175682	1.147435839	1.016224737	1.064253132	0.907665464	0.988498283	0.945222093	1.04951912	1.02123487	0.922278544	1.004384781	0.972004857	0.927979897	1.064754255	0.907482314	0.872992752	0.938394627	0.985355649	0.902949057	0.97499633	1.000521024	0.999196386	1.008963383	0.970871214	1.000772705	0.976553911	0.920005122	0.975563535	0.877114502	0.915659286	0.992767623	1.092759174	0.894285634	1.102160137	1.024929209
P00334_Adh	1.150919329	1.067408702	1.052098894	1.046768035	1.07176147	0.966131414	0.893804798	0.966333439	1.428869952	1.022064983	1.262188209	0.899940295	0.899214966	1.590231042	1.055729371	1.028029511	1.050926088	1.098001124	1.132229687	1.139960137	1.361508588	1.040960837	0.871509315	1.10552204	1.167241945	1.048043601	1.151812757	0.98754078	1.315333636	0.970755609	1.212858989	1.379273137	0.981629483	0.909215496	0.983463671	1.296677824	1.523894839	1.025871755	1.272274567	1.08981729	1.047167949	0.951008514	1.097581796	1.120271928	1.222416523	1.034451667	1.113817754	0.899071417	1.075821675
Q6AWN0_Adi1	0.983704236	1.311077474	0.97960878	1.090089908	0.966031508	0.822710797	0.834739907	0.773203991	1.081684131	0.924009249	0.930172233	0.71603315	0.760665928	1.001112179	0.893946383	0.871297586	1.240066903	0.835144674	1.126317144	0.926986286	1.239324975	0.80509158	0.885537263	1.212330134	1.109859796	1.357907638	0.908132421	0.845178504	1.080776082	1.156344965	1.042727865	1.126155572	1.108286669	0.998048638	0.89211605	1.063429463	1.053186536	0.976679539	1.101845005	1.040364619	1.129195994	0.753563047	1.180478971	1.159466132	1.159085391	0.769176102	1.139813282	0.756913637	0.920030736
A4V392_AdipoR	0.948381289	0.994940559	1.236086538	1.190799888	1.018747866	1.000993264	1.337510305	0.754987634	0.962901896	1.218136851	0.927287716	1.086892003	1.298871795	1.149538462	1.091282051	1.099487179	1.140512821	0.994522049	1.215831279	1.012873185	1.016433854	1.140784983	1.407636519	1.100682594	0.982935154	1.026023891	1.141955836	1.088328076	1.160094637	1.279179811	1.090301003	1.08769974	1.267372724	1.007617986	1.554689841	0.949526949	1.10745323	1.072092127	1.018023032	1.062074575	1.132839591	1.171855665	1.110676632	1.081572044	1.15060241	1.117701576	1.306765524	1.102873031	1.198036254
Q9VU38_Adk2	0.97558896	1.184519199	1.052548923	1.030206303	0.975908161	1.053879634	0.944117418	1.070405475	0.99584548	0.985049963	0.955848286	0.876636476	0.863596343	1.00204952	1.109705698	1.029622077	1.16856749	1.050299376	1.154038657	0.923868017	1.030761305	0.933338912	0.947149471	1.170733272	1.009476194	1.151741835	1.025970709	1.02494445	0.82975398	1.102909539	1.153045518	1.015418258	1.127137188	1.000202452	0.957814933	0.988990694	1.022916788	1.133088239	0.977804676	0.938298195	1.187843792	0.938394919	1.136263993	1.124504292	1.029034913	0.992419891	1.151357258	1.064405439	1.063791297
Q7JWW6_Adk3	1.171273083	1.003546533	0.963739758	1.116118381	1.073621132	1.223064694	1.15801462	1.163364763	1.095878801	1.20500053	1.156849243	1.141805276	1.09322806	1.123139994	1.267689037	1.350592165	1.208017006	1.247742103	1.083747461	1.096495398	1.169439523	1.108979045	1.060733431	1.171539961	1.034661306	1.141447368	1.207052302	1.235897962	1.298465329	1.016219268	0.938508752	0.982950671	0.937258468	0.976358263	1.028802313	1.046484042	1.057938244	1.073321719	1.085257812	1.061533899	1.075582904	1.181953544	1.070503276	1.021292436	1.18919535	1.205607477	1.177646076	1.156978953	1.179219488
Q7K7W5_adp	0.985618901	0.98459168	1.017976374	1.116076014	1.050847458	0.997945557	1	1	1	1	1	1	1	1	1	1	1	1	1	1	1	1.06986692	1.173003802	1.05608365	1.031844106	1.067015209	1.152248659	1.077293357	1.249484253	1.054325402	1.394610202	1.394610202	1.478344562	1.214629451	0.937024019	1.042765085	1.15407147	0.966315173	1.04950205	0.998242531	0.969830111	0.888235294	1.141176471	0.852941176	1.146053702	1.092351505	0.846216436	1.043124491	0.948392938
Q9V778_ADPS	1.137039728	0.948686575	1.059610752	1.073261194	1.220701258	0.924176959	1.19972648	0.633255456	0.939597698	0.801812069	0.904609949	1.184170038	1.216098951	0.955640461	0.739671027	0.903186116	1.004015024	0.894450837	0.939713592	1.044048076	0.921876998	1.239290171	1.217385277	0.885345903	1.005406904	0.967419936	0.952668507	0.943984357	1.187140557	1.005808604	0.904880375	0.995646225	1.034042377	0.898494838	1.132873604	1.026001552	1.021702788	0.918681712	1.118813063	1.155800346	0.864768046	1.287869779	0.939200238	0.980935038	0.975932611	0.914627624	1.009158978	0.907206846	1.000453104
Q9VEP6_AdSL	1.252450279	1.423590637	1.706089277	1.262396129	1.363849462	0.848068567	1.403812606	0.719280534	1.335566509	0.779836094	1.059527433	1.231072444	1.194138631	1.119133544	0.874263384	0.83851543	1.364049386	0.855648772	1.123098598	1.398980269	1.364419587	1.397992399	1.328390294	1.110956392	1.367279044	1.312631666	0.866674244	0.785636887	1.136455255	1.178286732	1.035219623	1.364280984	1.25744491	0.921674392	1.468056852	1.262639394	1.298316611	1.000265596	1.396342465	1.231082408	1.074415776	1.323462745	1.168046493	1.225631326	1.07967801	0.812075011	1.128066374	0.785612975	0.882022941
Q9Y0Y2_AdSS	0.925093936	0.926100629	0.918814728	0.887954022	0.924599006	1.235088145	0.903746444	1.161942354	1.006814172	0.966320707	1.106578331	0.944703489	0.918494411	1.019239069	1.004668377	1.103795723	0.990995639	0.95313437	0.913278301	0.942480686	0.981511271	0.904952322	0.937115774	0.981687108	0.906693932	0.947127861	1.003472823	1.092265886	1.065700361	0.867429429	1.006908891	0.951725126	0.924515906	0.99403466	0.920215436	1.010712408	1.051773667	0.984688921	0.922143432	0.907209635	0.949381942	0.84190885	0.979286847	0.978384641	0.975768702	1.153019541	0.988600429	1.324884579	1.014386865
Q8IQD6_Ae2	1.043883246	0.97094525	0.881974278	1.007213501	1.007441014	1.058845572	0.869190933	1.09726071	1.116204061	1.087720892	1.132558034	0.947826284	0.977512463	1.129054982	1.026479301	1.164186114	1.080160393	1.055711071	0.927401797	1.091113673	1.066798397	0.99572047	0.937085984	0.951842986	1.091460615	1.017741195	1.055787836	1.107913114	1.225434929	0.969750792	0.967730341	1.046347698	0.928152083	0.994947881	0.903066587	1.074600255	1.105998048	0.973425419	1.080080324	1.048588695	0.961451843	0.957449423	0.970656892	0.986382996	1.205978685	1.205926696	0.987210814	1.203535222	1.040392457
Q8T4G5_AFG3L2	0.960352365	0.980566067	0.94452533	0.940106644	0.955995834	1.239400144	0.950431668	1.202365025	1.051088219	1.018962597	1.136275916	0.998472113	0.963376378	1.022141835	1.053786066	1.087315885	1.03058494	1.020971349	0.9782113	0.971190007	1.020704773	1.070804848	0.994160344	0.974008842	0.981501894	0.957168041	1.05894968	1.133217596	1.074044525	0.933861387	1.040090226	0.987041074	0.975943907	1.019581508	0.943235538	1.037316163	1.049334834	1.051205805	0.991777528	1.017474066	1.002107249	0.89998655	0.97215511	0.997520877	0.947941112	1.146412957	0.967804285	1.256055683	1.043671474
Q9VY18_Ag5r	0.763953189	0.873521091	0.860018004	0.780221193	0.739390432	0.943930041	0.82775974	1.25211039	0.822727273	0.909415584	1.788798701	0.73262987	0.728713126	0.975009661	0.699214221	0.829705011	0.940615741	0.925072046	0.882183421	1.074927954	1.012374979	0.841216781	0.757312385	0.932809627	0.636469998	0.852582317	1.384841486	0.892924627	1.185597313	0.811253412	0.985232975	0.763655914	1.061146953	0.82516129	1.035492049	1.073519244	1.171007145	0.826457709	1.088730122	0.973957133	0.790504725	1.007082153	0.857176582	0.896364495	1.194058046	1.01236476	0.644169672	1.345698094	0.894975972
A1Z992_AGBE	1.093591683	1.36396582	1.478847859	1.309469914	1.019557016	0.755664215	1.266543453	0.672545889	1.113619616	0.909246589	1.006466446	0.927637566	0.948178091	1.044642832	1.150155947	0.926998034	1.352581908	1.048360509	1.363267704	1.087524977	1.209225906	1.088966059	1.297376181	1.33690666	1.293855773	1.510654478	1.143965448	0.86861308	1.188696037	1.3706548	1.274210117	1.200497151	1.324570139	1.107154969	1.292401899	1.163661748	1.046124471	1.126826639	1.250761453	1.042835365	1.227701784	1.028883379	1.360101217	1.393146577	1.050262546	0.84361096	1.366521713	0.677869472	1.065540785
Q9W469_AgmNAT	0.992286331	1.035174329	1.04072817	1.005245295	1.035482876	0.88336933	1.091487052	0.865560552	0.899054117	0.957202667	0.87594976	1.035509381	1	1	1	1	1	1.145555955	0.907880533	1.214285714	1.011874775	1.041527446	1.05274463	0.810501193	1.101431981	0.835799523	0.862027594	0.803239352	1.01079784	0.983203359	0.730684327	0.938435124	0.932303164	0.903850871	1.062755949	0.993691201	0.96613171	0.938904261	1.050138351	1.056557831	0.910902048	1.098746759	0.818928263	0.857281763	1.138868371	1.111833358	0.951839267	1.121731423	0.93364726
Q7KY08_AGO1	1.13202207	1.044049235	1.128239043	1.105300077	1.164641956	0.938675871	1.275188826	0.887849954	1.100028127	1.003045915	0.972593624	1.244791417	1.20894534	0.989775938	0.946607678	0.967227059	1.117025831	0.988614314	0.971968899	1.075839894	1.062049562	1.212166815	1.235986654	0.977297429	1.096069803	1.048407324	1.027519028	1.001106293	1.202938313	1.075592973	0.935611903	0.986864985	1.095393412	0.951153857	1.209092231	1.059521213	0.952752936	0.9727842	1.047942342	1.116324935	0.966922056	1.22852625	0.996547727	1.032539836	1.035013257	0.947911408	0.967726442	0.878561241	0.983558881
Q9VUQ5_AGO2	0.931231088	0.736571309	0.756004657	0.763505971	0.845453702	1.574980508	0.761873066	1.174295711	1.502460063	0.755311398	2.080795316	0.77159189	0.771013547	0.791240178	0.785842524	1.212875096	0.865769778	0.800997488	0.745934864	1.001830595	0.880016625	0.78422107	0.84180927	0.797361258	0.756533774	0.728055084	0.859458552	0.949210118	0.949168133	0.73843993	0.818113368	1.065245996	0.802875386	1.039988519	0.794915207	1.448036184	1.184967398	1.121526417	0.732516651	0.742710024	0.738589299	0.650159815	0.814872369	0.769490801	0.749322961	1.119782925	0.785181319	1.194334739	0.728082756
Q9VYJ4_Agpat1	1.109654063	0.996138375	1.092839903	1.120273532	1.12003218	0.890265487	1.394711187	0.744333415	1.104923227	0.919692908	1.007555447	1.388252498	1.342543171	0.911983255	0.791313448	0.906017792	1.063683935	1.074276068	0.951175172	1.185949877	1.103493053	1.332595246	1.276196679	0.907456854	1.116834907	1.053207424	0.970631119	0.934527529	1.139970839	0.974380337	0.803474395	0.963938745	1.057385147	0.848015808	1.237927565	0.947183099	0.882293763	0.881249033	1.114262498	1.168743229	0.907367281	1.306432974	0.981317411	0.952234206	1.073817342	1.00024322	0.901009364	0.953909765	0.982154403
Q7KTI0_Agpat2	1.059370919	0.90694384	1.051806704	1.024923814	1.019536352	1.214954288	0.935887988	1.030361091	1.13220339	1.085482682	1.103463522	0.906853353	0.901832461	1.217931937	0.895942408	1.148887435	0.991492147	1.096761758	0.889745567	1.107941403	0.962991519	1.268201991	1.047019312	1.021350606	1.160369437	0.915077366	1.069472157	1.154271721	1.101306004	1.025122438	0.959584692	0.953063326	0.999141926	1.117556204	0.987432261	0.950363196	1.062435144	0.989680618	0.888331604	0.941542719	0.926553672	0.932899238	0.980079461	0.866019203	0.898738343	1.223038947	0.964783324	1.266812946	1.132840028
Q9VV51_Agpat3	1.039366178	1.134505791	1.105408828	1.065736258	1.062595747	0.984026799	1.103094295	0.814886975	0.884461484	0.860697351	0.837310316	0.922764824	0.955087271	0.903772473	1.093869732	0.960388218	1.191804205	0.989090112	1.180546164	1.029909297	0.961806254	1.034527246	1.171406428	1.092889429	0.962507309	1.132205938	0.984597906	0.989938066	1.039653321	1.103174375	1.154062902	0.94431675	1.212437234	1.006483926	1.126271877	1.023167795	0.978876311	1.082913325	0.989309214	0.999283236	1.068775243	0.974361388	1.187758627	1.159958906	0.831127688	0.922134953	1.121878325	0.927737729	0.992382031
Q9VV49_Agpat4	1.100347216	1.191970841	1.373473371	1.255920814	1.019813782	1.110677331	1.402636489	0.907201188	0.89532294	1.35809306	0.919300146	1.06474849	1.159406148	1.037359727	1.235101415	1.161845682	1.32975535	1.079236655	1.172075162	1.063963885	1.089467358	1.203800307	1.409488965	1.368039655	0.982037059	1.142546914	1.32026263	1.286863943	0.983904797	1.339093562	1.187782519	1.08601242	1.205441257	1.26255756	1.443609316	0.990414462	1.037600297	1.091501864	0.920836343	1.073131211	1.144251606	0.951542364	1.469823313	1.305732113	1.004749903	1.218980225	1.29207057	0.980224893	1.115079975
Q27580_Ahcy	0.923413885	1.179690181	1.286658485	1.074542706	0.948967321	1.122082114	1.034621538	1.133989433	1.022853712	0.886882575	0.921687713	0.853677373	0.919862327	1.049268796	0.886469452	1.171933952	1.191707693	0.928607629	1.065425101	0.969033256	1.020716119	0.82994064	1.046262526	1.201814191	0.903143712	1.157448202	1.035976635	1.063195327	1.162297965	1.153997047	0.923177541	1.016283327	1.074013418	1.066811229	1.095558749	1.047055875	1.133327764	0.908240877	0.960653656	1.1016709	1.115816736	0.924523369	1.149433702	1.093105379	1.098533671	1.03066724	1.057295692	1.117403751	1.039979367
Q9VZX9_AhcyL1	0.813558511	1.053166945	0.950910725	0.912024172	0.783049469	1.023782424	0.8641903	1.017286316	0.868737789	0.941459966	0.867110399	0.820246577	0.945927992	1.012045309	1.044493399	1.078201703	1.067646182	1.011037445	0.965396859	0.893427797	0.880656776	0.816274732	0.897965659	1.093288432	0.907965353	1.021643069	0.926483188	1.055887297	0.877437098	0.978537839	0.995906443	0.977293004	0.948344209	1.047831639	0.860178223	0.932716712	0.926407288	1.072454947	0.884325894	0.88241238	1.036559653	0.819358525	1.0466519	1.061824772	1.04132934	1.135759034	0.983324396	1.193197226	1.050821103
Q7KSG0_AhcyL2	1.09373395	1.005221709	0.896593049	1.082605718	1.232323232	1.128916281	1	1	1	1	1	1	0.788593309	1.006045949	1.081418783	1.064490125	1.080411125	1.032904309	1.055959709	1.094012311	1.124566312	1.005900846	0.97025393	1.008464329	1.007013301	0.992019347	1.094368812	1.011293317	1.195080446	0.973700495	1.071296991	1.157603875	1.004502968	1.064269632	1.032940591	1.15341852	1.054596747	1.067623631	1.148357119	1.169681381	1.038997677	0.939042254	1.035943662	1.078873239	1.031546093	1.118604392	1.010701148	1.012261732	1.007083825
Q9VQ79_AIF	0.97428115	0.944253765	0.920670927	0.895285258	0.947083524	1.320899133	0.904279279	1.175946379	1.001510525	1.020784607	1.111616424	0.924760698	0.929110077	1.034838044	1.102019555	1.246427786	1.008191002	1.087857939	1.003103902	0.968463614	0.980170024	0.927472878	0.965629653	1.00110083	0.946771963	0.98908211	1.128194916	1.265429106	1.145170973	0.930981737	1.045284832	1.019075818	0.934903054	1.075629638	0.927765732	0.958942435	0.967289175	1.082968455	0.94336341	0.928334616	1.01211443	0.890867493	0.985561808	1.005196548	0.974760089	1.240911352	0.973184861	1.302650942	1.104605743
A1Z7K8_AIMP1	0.954034371	1.016597553	1.158713458	1.0050752	0.942367601	0.899671969	1.010142293	1.084397919	0.962828308	0.988641635	0.959869617	1.060916442	1.084162802	0.960159466	1.023959039	1.008507478	1.102558758	0.808946091	1.138024405	0.862854732	0.840981819	1.103206675	1.108323564	1.119398662	0.974898283	1.064492104	0.997818469	0.987943559	1.058321149	0.979786024	0.963294595	0.95657125	1.067264644	0.964948132	1.063644271	0.964167213	0.97727834	0.977901146	0.941714003	1.067520698	0.975334758	1.12320947	0.98469177	0.985683274	0.940299084	0.93255149	0.974970053	0.991112485	0.986570012
Q9VUR3_AIMP2	1.040870788	1.127426126	1.266296483	1.136437816	1.072575927	1.025711031	1.271909713	0.94712086	0.988329611	1.006330705	0.981022675	1.206724156	1.163716453	0.928032466	0.940615058	0.952565462	1.100069337	0.960899804	1.096870246	1.058661161	0.989111063	1.210336361	1.304764333	0.996095689	0.976587552	1.035340051	1.016815088	1.025466985	1.037883724	1.04286128	1.072678215	0.994369564	1.130079097	1.057930661	1.316946864	1.019230484	1.002537356	1.00695918	1.002596709	1.142002879	0.97734186	1.1294433	1.102557886	1.095836532	0.851790551	0.973267128	1.064583542	0.953188217	1.022970736
Q8MKK1_AIMP3	1.010739526	1.023698771	1.212946188	1.045341037	1.082423412	1.04015081	1.218928892	0.937715854	0.975209349	0.936272886	0.978213559	1.205492738	1.202506277	1.068118751	0.921926618	1.047923182	1.129278069	0.954057008	0.95310081	1.069119388	1.063518805	1.245639478	1.284364834	1.074040685	1.029788735	1.06012621	1.129060282	0.988197902	1.119525373	1.009598474	0.933712121	0.987689394	1.022763695	0.978693182	1.240404807	1.0457179	0.969614168	0.989272612	0.960860215	1.187779886	0.964629981	1.202597511	0.967822503	1.002206219	0.959871589	1.053198808	1.00278442	1.046843778	0.924109349
Q9VF23_AK-3	1.209838224	1.038844996	1.293453725	1.105906697	1.232317532	0.661681716	1.252695318	0.807118594	0.947570521	0.783488406	0.894697977	1.598877566	1.819305277	0.914829659	0.899799599	0.922845691	1.130260521	0.842925659	1.004796163	1.580935252	1.196642686	1.442140297	1.379416283	0.888632873	1.213005632	1.068868408	1.059384615	0.984923077	1.231384615	1.052	0.914508184	1.07754648	0.901954553	1.042269188	1.267639321	1.052140636	0.969146137	0.846448218	1.236307104	1.357569959	0.788088974	2.149553571	1.0390625	1.1484375	1.113172004	0.812346037	0.910013042	0.809013186	0.781578558
Q8IQG9_Ak1	1.034644977	0.825293989	0.744796171	0.814436525	1.003205797	0.833248839	0.774575137	1.10016869	0.973734473	0.91288391	1.072794825	0.902898409	0.889839906	1.022193553	1.008756404	1.014817915	0.911140492	0.981849641	0.887263335	0.938480755	1.034004498	0.938219114	0.836282289	0.969865057	1.018959439	0.955458238	0.904883029	1.027157594	0.714214031	0.90577983	0.923828984	0.982308211	0.873840217	0.902767477	0.762741462	0.963055311	1.016304511	0.88805276	0.963610396	0.835217624	0.935334041	0.873681979	0.900229809	0.891418424	1.122027385	1.00866741	0.968847789	1.073085309	0.992797569
Q9VGU6_Ak3	1.070035574	0.965711617	1.038722391	1.030538991	1.113806209	1.039682133	1.07486724	1.062945781	0.940146965	0.926960837	0.889608132	1.204444924	1.135319875	0.871974308	0.906279037	0.977861922	1.047127625	0.927477734	0.929632106	1.069814856	1.00176642	1.219670622	1.115443285	0.954725731	1.117190577	1.04452543	0.989986497	0.977318813	1.137409575	0.986524925	0.908201622	0.981425886	1.01313748	0.91447078	1.025737683	0.964522152	0.954249322	0.920679704	1.05866342	1.114698634	0.878856701	1.152971731	0.949710054	0.977201661	0.957024032	0.988238382	0.960408979	1.01716575	0.915267685
Q86BM5_Akap200	0.999980129	0.960243902	1.349004891	1.077738004	1.088522254	0.905224073	1.470629569	0.963111807	0.895815612	0.907810336	0.757960527	1.559696249	1.608942263	0.749611322	0.871286865	0.823729184	1.064857563	0.89562186	0.904690295	1.084982399	0.91394101	1.536345038	1.48433696	0.741353126	1.053704674	1.041337642	0.869093921	0.857162137	0.995788602	1.052067358	0.802008784	0.878675478	1.084682201	0.975025151	1.39686363	0.867971667	0.782904853	0.818094483	1.03319824	1.207048569	0.901752479	1.520019971	0.889459646	0.942859584	0.875422326	0.828026839	0.892946309	0.897050842	0.85953671
Q9VM96_AkhR	0.949636736	1.000070537	1.113705297	1.35367144	1.0456373	1.12506172	1.223950233	0.942716433	1.129082426	1.636599274	0.989631934	0.984966304	1.059771659	0.981195433	1.347884486	1.151108126	1.079919409	1.419030921	1.32196366	1.086707045	1.23716927	1.072727273	1.560839161	1.448951049	1.033566434	1.176223776	1.136206423	1.20867417	1.241998353	1.272028548	1.02992126	0.788188976	1.434645669	1.432283465	1.238465074	0.975965074	0.981387868	0.963051471	1.07109375	1.128814338	1.267279412	1.048415493	1.172926448	1.120305164	1.320670887	1.123070088	1.202376985	0.86571143	1.44738282
Q9VTK9_Akr1B	1.139417929	1.141568488	1.360584846	1.233407793	1.034054958	0.817696283	1.164037742	0.930422276	1.081039782	0.873780611	0.843546918	1.058974306	0.964342766	0.961902304	0.91384663	0.881527934	1.132654615	0.860832838	1.122744088	1.096704485	1.263667591	1.188434271	1.08834589	1.085764306	1.191281292	1.172426394	0.929662166	0.847788429	0.91823078	1.156274993	0.992100938	1.123025923	1.218114951	0.813706278	1.07893301	1.066788283	1.153379812	0.992273141	1.137039874	1.148378848	1.050748161	1.122300519	1.119563545	1.160825803	0.915377585	0.820018751	1.062895166	0.738628333	0.942100742
Q8INB9_Akt1	1.182555917	1.053921733	1.060013637	1.087522216	1.163978404	1.050937259	1.042090601	0.95744509	1.119609981	1.092336886	1.03185562	1.034237726	1.115645402	1.015970936	0.99751803	0.995269869	1.169673207	0.996495764	0.99302555	1.127479332	1.175245807	1.083758423	1.073934127	1.062829313	1.181266662	1.033335433	1.091339973	1.046972041	1.304746235	1.010024189	1.005231998	1.167836982	1.027751006	1.133890189	1.129672243	1.218473168	1.080144981	1.012602387	1.197393679	1.223289974	1.015833462	1.071104485	0.994101633	1.022772448	1.01750208	0.990402548	1.031575474	0.941741027	1.019716537
Q9W351_Aladin	1.0818751	0.971263445	0.986835768	1.036442447	1.066262642	1.13264569	0.989078261	0.92893913	1.066713043	1.018434783	1.04706087	0.934643478	1.054739753	1.052049471	1.072525502	1.124276053	1.055188133	1.035485646	0.882339702	0.894568371	0.995248575	1.103179268	1.098263425	0.971413305	1.073310179	1.072775848	1.076262927	1.057664194	1.191862039	1.004710596	0.934756098	0.98691796	0.925886918	1.010532151	1.134476332	1.166492732	1.070443533	1.0226612	1.092732016	1.235669027	0.99280656	1.016474134	0.927473631	0.952009041	1.035147247	1.103393086	0.9446863	1.00396927	1.131173686
Q9VLM8_AlaRS	1.075391372	1.195232454	1.407887591	1.223511509	1.137198156	1.002562374	1.410976339	0.845537011	1.035961161	1.002505048	0.94105266	1.269875107	1.275421765	0.992187471	0.861213157	0.898135002	1.270476611	0.873956797	1.085383012	1.117588339	1.047514112	1.287586646	1.431783362	1.095007743	1.124707436	1.173067998	0.940345357	0.912743185	1.159274036	1.218861771	0.961108575	1.080740257	1.214470552	1.035270109	1.412702112	1.021375879	1.016252827	0.913601629	1.092850658	1.211989582	1.076855102	1.222015237	1.091447553	1.098036076	1.049870465	0.872021399	1.05009493	0.894247154	0.942569627
Q9VRJ1_AlaRS-m	1.048667851	0.902427472	0.97240971	0.871284784	1.026761397	1.045115453	0.913553114	1.172161172	0.942857143	0.766300366	0.645421245	0.842490842	1.122081846	1.150233452	1.091595715	1.020736062	1.184976655	1.013174146	1.069987649	1.23054755	1.196788802	1.129143138	1.113429904	1.229560521	1.054505279	1.024306408	1.03299725	1.005582868	1.231564036	0.87884343	1	1	1	1	1.019720743	1.097404155	1.12801689	0.955856245	0.973801641	1.054363994	0.942325224	1.188764319	0.85096271	0.879112844	0.971174686	0.934655397	0.839401821	1.212613784	0.929329474
O18680_Alas	1.073941134	1.014070352	1.194974874	1.139985642	1.206748026	1.03948313	1.062018646	1.238346169	1.175516822	1.073368464	1.347385488	1.434130523	1	1	1	1	1	0.961685824	0.896004379	1.107279693	1.086480569	1.105994787	0.813205908	0.986967854	1.342311034	1.039965248	1.128852956	1.116725619	1.268317332	1.120262759	0.805252725	1.065411298	0.847869177	1.055004955	1.161205617	1.037561365	1.071012673	0.867222286	1.161319785	1.198310309	0.880123302	1.173365556	0.864919868	0.968455864	0.713313897	1.191448008	1.052478134	1.226433431	0.8
A1Z7Q8_alc	1.089564608	0.889510423	0.943743227	0.971090712	1.083859247	1.025658188	1.003250493	1.054004249	0.947787361	0.976709068	0.946456451	0.98469453	1.090482065	1.02775669	0.948709433	1.100896755	1.046854242	1.069169898	0.962987484	1.048173019	1.122639427	1.081090085	1.024986674	0.948360874	1.078491471	0.992404051	1.017237927	1.041033942	1.22759737	0.939458666	0.952869795	1.03752588	0.965177134	1.046583851	1.004970118	1.019728016	1.06895658	0.947417368	1.077616173	1.103594951	0.908098549	1.110543762	0.8753432	0.929250653	1.176031227	1.012870556	0.954720962	1.044224074	0.99598197
P07764_Ald1	1.017866032	0.965040363	0.980263928	0.98622747	0.983460212	1.029923372	0.825693217	1.253930784	0.991189208	1.055616486	1.090767694	0.822744889	0.86239216	1.079021765	0.995470522	0.961008468	0.91481577	1.0526449	1.051584006	0.978997598	1.065949723	0.828523002	0.817958119	1.064913045	1.010139282	0.973750237	0.927413465	0.967414799	0.952247094	0.963567538	1.05112163	1.022295053	0.975246764	1.091510633	0.803313212	1.006036476	1.051993749	1.043459628	1.033055912	0.947543026	1.077063105	0.84720812	1.05979694	1.015932061	1.056821161	0.996833194	0.993915778	1.131749677	1.049453921
Q9VBF5_Ald2	1.094048546	1.062982096	1.080744463	1.120232114	1.094685443	1.065529687	0.829356326	0.801985161	1.651694405	0.835973531	0.859234008	0.836374574	1.165144695	1.320514469	0.976463023	1.225980707	1.183794212	0.880113838	1.016720028	0.881892565	0.985058698	1.063191882	0.947416974	1.333948339	1.224630996	1.095940959	1.194038748	1.189269747	1.380923994	1.124888227	1.07130328	1.038589721	1.088756359	0.938694966	1	1	1	1	1	1	1	1	1	1	1.113415332	0.832236842	1.115560641	0.809067506	1.019587495
Q9VLC5_Aldh	0.762896182	0.973010081	0.837254417	1.023570209	0.79720629	1.790298814	0.8462222	1.493920828	0.881623832	1.245333317	0.81112698	0.643308314	0.635697132	0.901974052	1.385176848	1.409293521	1.090357815	1.353188904	1.251289659	0.701612227	0.858558918	0.665033414	0.79002371	1.132211102	0.789172672	1.078443033	1.349636308	1.45826021	0.85440312	1.057653694	1.207430145	0.8374869	1.044327273	1.045541662	0.863638396	0.885873234	0.935011488	1.280037594	0.863831732	0.787239666	1.062016379	0.673951223	1.129515706	1.09123968	0.79396225	1.478621307	1.086756889	1.391402942	1.342768693
A0A0B4KEL0_Aldh-III	0.982336888	1.096530641	0.951044317	1.075210226	0.997019205	1.064822468	0.944807243	0.895923694	0.997015349	1.122377663	0.901958182	0.935969697	0.929589699	1.026476619	1.139287722	1.086758802	1.065609498	1.084968382	1.174888956	0.971356684	1.029558479	0.922945685	0.92445507	1.111204633	0.956065157	0.876196349	1.114111785	1.074261156	1.001613028	1.006430016	1.158182632	1.052254445	1.054109534	1.050480323	0.956094537	1.109564184	1.091714587	1.243035075	0.953106735	0.977354476	1.169060698	0.942379915	1.144479253	1.150218413	0.868311742	1.064581541	1.166222404	0.934463746	1.117845361
Q8SXQ1_Aldh7A1	0.922243365	1.160493861	1.220953373	1.121085316	1.015181668	1.339683336	1.059613227	1.238618649	1.097841308	1.171787364	0.954906958	0.992532133	0.969038757	1.081104697	1.246286371	1.286453424	1.157809458	1.217480029	1.201015924	1.008589328	1.10544257	1.149667395	1.098273044	1.184607915	1.058208303	1.090688678	1.229983778	1.29190904	1.155303903	1.064272207	1.267927325	1.035834417	1.163307216	0.997981801	1.150776033	1.049261509	1.279756389	1.29438616	1.081995251	1.047065554	1.202018968	1.08319591	1.10919548	1.112537118	0.934145149	1.324748813	1.201150885	1.250367737	1.242844526
A8Y589_Alg-2	0.990946459	1.180064866	1.275352516	1.126159877	0.989125345	0.909984911	1.280521961	0.71906429	0.955442393	0.779057925	0.867250159	1.061425843	1.109494109	0.919558612	1.131563516	0.930326776	1.309824618	0.940747664	1.288691589	0.807009346	0.71364486	1.166259703	1.367943438	1.151681913	0.997631109	1.266554904	0.966710354	0.872477064	1.05242464	1.090432503	1.02239529	0.98908183	1.084476077	0.966910121	1.283363583	0.99195233	0.869576384	1.005684737	0.984401219	1.010444848	1.020307524	1.060111939	1.006786832	0.999118593	0.932671809	0.880227916	1.085972325	0.909570138	0.915245296
Q9VEE9_Alg1	0.974983692	1.006250284	0.829528043	0.978958387	0.975089886	1.3162917	0.807333205	1.07012094	0.965218757	1.416292909	1.041447793	0.761609745	0.763002307	1.027778316	1.346870336	1.437997945	1.146761781	1.359689703	1.132219551	0.925233834	1.008787701	0.834353388	0.870952935	1.139237407	0.963079136	1.022446294	1.300015304	1.360967185	1.189632933	0.985986314	1.072951059	0.983219794	0.951958039	1.266289129	0.87715562	1.044852483	1.02327031	1.234040619	0.937227301	0.92252753	1.204602119	0.764070984	1.064706661	1.086121044	1.036185917	1.348533812	1.147496509	1.197526431	1.336939674
Q9VP06_Alg11	0.991807576	1.08960873	1.109106698	1.092082842	0.973571241	1.062213265	1.125499905	0.952485241	0.904494382	0.959023678	0.893036247	0.983907827	1.031294489	0.977781167	1.120627415	1.133058776	1.086612772	1.073728716	1.061011783	1.032365907	1.036036774	1.138549267	1.183470704	1.026494684	1.025000623	1.054060111	1.078230056	1.104688352	1.090859531	1.02916591	1.006796941	0.961219673	0.998111961	0.927518172	1.196632237	0.997193531	0.9508932	1.093587411	0.97105108	1.003626624	1.080836558	0.874352373	1.136025744	1.110008045	0.894341539	1.052487832	1.076788403	1.065986204	1.000956217
Q9VH78_Alg12	1.085882509	0.915843995	1.003408739	1.111957147	1.158705565	1.043605295	1.113366108	0.871801336	0.954788016	0.853187109	0.933736712	1.115172906	1.182914615	0.998581087	0.954302646	1.073825223	1.059260496	0.984352301	0.955422737	1.165027186	1.059394845	1.127927618	1.143446143	0.941533528	0.984825059	1.041172765	1.026671644	1.00240584	1.119835739	0.99991704	0.960218448	1.04343905	1.067087529	1.008968385	1.055878373	0.885510361	0.844994561	0.88919844	0.938868105	0.976279551	0.979543103	1.029049838	0.983650218	0.972257158	1.008021878	1.004083865	0.966235187	1.089808569	0.98095177
Q9VAP1_Alg13	1.119412382	0.853515215	0.93798531	1.165057712	1.069150052	1.276285414	0.767111494	1.316831683	0.945759793	1.06155833	1.088247955	1.137752906	1	1	1	1	1	1.275622703	1.038383013	1.023274806	1.084524296	1.199801193	1.009940358	1.382703777	1.147117296	0.892644135	1.133172444	1.206669592	1.194602896	0.867485739	1.088602654	1.00058548	0.977556596	1.173887588	1.030596556	1.027829028	1.16897294	0.951568266	1.054735547	1.246463715	0.959870849	1.019013361	0.927029805	0.86356629	1.183279743	0.822508039	0.58392283	0.803215434	1.078336557
Q9VXU7_Alg14	0.993600445	0.928213689	1.013077351	1.072621035	1.110183639	1.066777963	1.163817221	1.018650917	1.147963942	1.255517563	1.034504196	1.094497979	1.138692098	1.229155313	1.064305177	1.373569482	1.048501362	1.180276471	0.998004845	0.946415847	0.951688756	1.328411105	0.991730656	1.060838748	1.491435322	1.240401654	1.206805802	1.159801701	1.24793439	0.956484485	1	1	1	1	1.056544887	1.128511107	1.129245456	1.142463742	1.029924729	1.045162475	1.093996695	1.22041307	0.723090373	0.902633592	1.032870709	1.079376674	1.095203311	1.117847577	1
Q9VZU8_Alg2	0.996557155	1.068508426	1.003624047	0.972736016	1.036268347	1.312964331	1.021498599	1.159908964	1.024754902	1.178326331	0.998494398	0.980077031	0.977026792	1.055668075	1.270441525	1.353162433	1.238122794	1.078495685	0.946247174	1.717606598	1.483743591	1.224670407	1.08024269	1.082204279	1.128894667	1.076365129	1.25625148	1.280856721	1.099113046	1.00752181	1.205935812	1.047904788	0.985658442	1.177626173	1.096239422	1.049241319	1.062609425	1.203932011	1.003373942	0.990808287	1.114859936	0.984957212	1.06051652	1.087167581	0.97289957	1.235873388	1.132082845	1.166041422	1.33083575
Q9VK30_Alg7	1.062776149	1.091648804	1.018985957	1.202327311	1.003805941	1.17354215	1.060873958	1.0149659	1.078997222	1.339353372	1.006377873	0.883240717	1.395450482	0.784096553	1.000198669	0.977798748	0.922717791	1.100885559	0.903814714	0.890940054	1.020367847	0.77618113	1.054675452	1.11201458	1.060493481	1.086990046	1.215258856	1.396263137	1.572985598	1.165823278	1.098745152	0.952087611	1.037462925	1.138945927	1.169211368	1.144124668	0.871593929	1.229788767	0.985632572	1.007071117	1.198937081	1.041543383	0.964054378	0.987245102	1.206042399	1.29412765	1.090522616	1.114556173	1.292116117
Q9VBV8_Alg9	1.064374522	1.079979609	1.333909202	1.179500977	0.971225467	0.924580135	1.370159162	0.847348711	0.962805345	0.913098987	0.911183931	1.24959571	1.295845724	1.070559611	1.067225376	0.997296567	1.204920249	0.761042723	1.118392469	1.290007241	1.127805938	1.165466026	1.374555318	1.155327286	0.967893988	1.236881893	0.993612349	0.896999135	1.093619003	1.273537827	1.014603783	0.890711037	1.175005985	1.035671535	1.417865021	1.026638372	0.991818613	0.968363443	1.120682434	1.173177338	0.973836316	1.459239591	1.051748489	1.157787696	0.978721787	0.959343415	0.981153583	0.854700205	0.989733407
M9PFB5_alien	1.10129202	1.025044408	1.162449308	1.054898281	1.080529209	1.002966116	1.190671889	0.903795234	1.113457083	0.973604369	1.048088592	1.229906774	1.199041359	1.080815873	0.941535265	1.045751432	1.138252024	0.967735912	0.968632137	1.122138616	1.100545203	1.242794579	1.19794934	0.998194946	1.113082204	1.019204593	1.030027515	1.012980022	1.168309606	1.025553296	0.9575689	1.102273383	1.016660701	1.058272044	1.185545874	1.118474043	1.0668064	1.006763931	1.107856777	1.167286007	0.969621806	1.182797709	0.949558981	1.004988019	0.943197454	0.974296703	0.930913582	0.93240555	1.021060979
Q9VB05_ALiX	1.0872457	0.97122956	1.009666596	0.960197494	1.106646846	0.98258866	1.065262405	0.940036839	1.062528586	0.914526041	1.025569009	1.103350852	1.123985918	1.054162627	0.913655459	0.99133119	1.04286103	0.93321965	0.915531042	1.129110058	1.068732168	1.118212363	1.080962061	0.917315712	1.027013862	0.936896413	0.937160316	0.968783295	1.070382684	0.913921904	0.92883324	1.083648555	0.986794906	0.97561065	1.03810634	1.066851679	0.995306253	0.940868939	1.021832769	1.062087283	0.920934864	1.088497373	0.953864746	0.980816302	0.969451833	0.968913312	0.925506209	0.985497406	0.953973833
Q7KJ08_Alk	0.958579882	0.917929336	0.916304682	0.880784622	0.956784212	1.155864145	0.915283626	1.149368343	0.988935678	1.072558005	1.070576336	1.000743126	0.958029493	0.974585426	1.021822503	1.196996705	0.950440231	1.064829626	0.912383424	0.997253493	0.954546826	1.047872983	0.996478448	0.950698273	0.95182517	1.010584779	1.093171435	1.148127555	1.108259197	0.910104592	0.929688575	0.937737926	0.882584965	1.009081319	0.951255694	0.94903925	0.978271872	1.00143109	0.938515506	0.927660169	0.943995532	0.999907234	0.960036364	0.959943598	0.9613354	1.148223057	0.946967508	1.206219957	1.047852307
Q9VIW9_Alp12	1.053843659	0.863687966	0.857281868	0.982484593	1.096821278	1.038355498	0.905161427	1.040781648	1.025594732	1.173428207	1.232264231	0.930012744	1.000708383	1.116725699	1.065249902	1.199527745	0.967965368	1.072171037	0.841011103	1.07146232	1.141034727	1.092610717	0.953388794	0.992292635	1.144115488	0.962197211	1.085587337	1.103193557	1.154290475	0.861094141	0.789632309	0.89270645	0.761301989	0.890596745	0.924838905	1.084172372	1.13018526	0.989478453	1.13969996	1.121123641	0.919150222	1.080655325	0.819671192	0.812453457	1.118738982	0.965881987	0.733278026	1.012547962	1.043158861
Q24238_Alp4	0.844376313	0.859336853	0.890819281	0.835575995	0.855163799	0.873388974	0.990218816	0.828678028	0.963497025	0.844307754	0.947010185	1.060350913	1.083469889	1.080755838	0.930305203	1.059453093	0.994008603	1.111774878	0.858198396	1.08976576	1.128596133	0.995613372	0.936973731	1.285584632	0.970453285	0.878989563	1.045650177	1.044634654	1.195609072	0.917210697	0.915972283	0.862643628	0.772125252	0.852118235	0.995303661	1.18422457	1.347884869	0.878606753	1.106272459	1.360977692	0.836873377	1.070651641	0.855169035	0.870308672	1.02585034	1.019851577	0.8288188	0.959863946	0.923911201
Q8IMK7_alph	0.986540842	1.02497858	0.970249429	1.021075305	1.057382902	1.084598724	0.965471583	0.94128132	1.089453045	0.988821552	1.087950703	1.090904461	1.078190204	1.070157824	1.026293496	1.098035832	1.189419849	1.001790706	1.035835954	0.985696191	1.044571104	1.049690918	1.0255191	1.113330163	1.043667776	1.025492682	1.12565472	1.067461954	1.243370314	0.998092548	0.997021845	1.044290891	1.005281458	1.054589733	0.995763287	1.096674905	1.06128749	0.98909137	1.053474919	1.157482596	1.007740148	1.016641693	0.992834362	1.004654317	0.971576894	0.983966453	1.01308472	0.971475983	1.020187903
P35220_alpha-Cat	1.064466167	1.017904425	1.056177929	0.995218842	1.074763838	1.017901732	1.103723701	0.952774564	1.017585808	0.985148048	0.998958735	1.115893217	1.13459388	1.002578622	1.02699639	1.042789814	1.07993219	1.01985156	0.954622169	1.078524655	1.019891271	1.122745222	1.132966646	0.989158028	1.033195825	1.041689585	1.041799572	1.056163915	1.112682243	0.99501095	0.957774147	1.016362142	1.003031882	1.018496988	1.103903645	0.981652493	0.935485583	0.993284756	0.998167435	1.025543526	0.979829294	1.067013686	1.00590211	1.037771413	0.993150799	1.026373935	1.006317711	0.991439335	0.976246456
A0A0C4DHD7_alpha-Catr	1.040442519	0.943537024	1.058237228	1.002974482	1.005531493	1.068099984	1.084725793	1.119965724	1.232969152	1.030955441	1.133997429	1.236825193	1.213591122	1.181100561	1.089463448	1.152728521	1.06452351	1.122900451	0.921480268	1.108562065	1.141198962	1.188706425	1.089023336	0.917747047	1.268078364	0.959377701	1.119019608	1.086078431	1.172156863	1.004509804	1.07850912	1.168120539	0.833267248	1.05075337	1.078821264	1.116350934	1.079985669	1.014599848	1.116395719	1.019794886	0.947153925	1.015885783	0.899524097	0.874187278	0.964444444	1.034589372	0.90821256	1.078743961	1.103585657
Q9VIC3_alpha-Est1	1.200335061	1.030506097	1.051622706	1.186874196	1.256516149	0.929150271	1.254488804	0.826890579	1.273288973	1.14168779	1.031421631	1.284907055	1.194537924	1.128397618	0.92234015	0.990939684	1.134222107	1.036872006	1.21059374	1.352400579	1.429932049	1.250686362	1.204129771	1.066316074	1.325432118	1.061443873	1.071689977	0.986666288	1.200516327	1.099378706	1.13302321	1.268001188	1.256544762	1.075122482	1.162555462	1.166744237	1.096000496	1.103633374	1.280058333	1.298116603	1.128083403	1.473878628	1.094775726	1.119630607	1.058043743	1.047107965	1.169838139	0.862505076	1.118355482
A0A0B4K604_alpha-Est10	1.021469251	0.969694487	0.875909917	1.175031753	1.08729736	1.168585515	0.995993571	1.128517621	1.161264784	1.430367296	1.074058969	1.087565674	1.094475519	1.111409087	1.126810206	1.158646847	1.072484867	1.125169592	1.211431572	1.08508031	1.09063854	1.033300759	0.968089905	1.139968428	1.188754416	1.084417049	1.185647116	1.167369374	1.203924858	1.110593585	1.071000052	1.129271219	1.200792947	1.333142052	0.900619579	0.997038414	1.054473358	1.170755886	1.116815366	1.109541512	1.274287485	1.017299557	1.104506443	1.087720371	1.011625126	1.108692532	1.196431134	0.991101756	1.240559702
Q961N0_alpha-Est2	0.958557589	1.326255015	1.353287993	1.5867991	1.185096389	0.856712986	1.612727793	0.650510447	1.072416754	1.449527717	0.712622841	1.126371529	1.09296875	1.011300223	1.146121652	0.969726563	1.280887277	1.138071968	1.566192803	1.191381608	1.370191026	1.169283799	1.580684284	1.501595813	1.161240904	1.27741606	1.121862738	0.990338343	1.244280743	1.313800252	1.2735096	1.120262723	1.358630774	1.179854735	1.525503978	1.032459609	1.052862791	1.188656221	1.200273344	1.183286962	1.337555523	1.143237119	1.37754901	1.307211112	1.134094897	0.839213051	1.324896405	0.772912234	1.150019483
Q8SZW5_alpha-Est3	1.053738629	0.989438651	0.990237408	1.038295984	1.111826048	1.009629465	0.982439636	0.991324344	1.065537786	1.087383715	1.024563604	0.977213338	1.03300376	1.055563292	0.966439215	1.03759922	1.06600752	1.142622412	1.065231679	1.122412093	1.055208676	0.991989634	0.997055012	1.120155495	1.024737896	1.040169631	1.125077094	1.083508079	1.237325768	0.986308129	0.975472813	1.061958235	1.066390859	1.026989756	1.042472699	1.132059282	1.048829953	0.999453978	1.140015601	1.123322933	0.981669267	0.935249526	1.061381343	0.997157296	0.915463918	0.960600628	0.983460332	0.963021067	1.049742171
Q95U30_alpha-Est5	1.086998137	1.300509623	1.083751552	1.240868171	1.025364756	1.073843647	0.963098671	0.903579304	1.383895957	1.185219112	1.193350297	0.86259542	0.789113004	1.350963693	1.223636635	1.205747298	1.342736192	1.209789413	1.397950296	1.076363281	1.361995002	0.935813171	1.016060355	1.444121757	1.246593589	1.240621452	1.206318887	1.140948866	1.379326811	1.1880953	1.267445109	1.22869454	1.235444639	1.201826497	1.109840105	1.298285714	1.279790301	1.240524246	1.166710354	1.09521363	1.342018349	0.853105262	1.350925796	1.28945596	1.112730139	1.049400372	1.374764934	0.866122403	1.287726025
Q9VIB5_alpha-Est7	1.085641457	1.123410421	0.940512724	1.10292568	1.109186093	1.157585478	0.925906055	1.027289964	1.211734583	1.285027379	1.098049907	0.93642132	0.94494555	1.219526711	1.227196966	1.184637374	1.069137995	1.208009635	1.247256393	1.063549873	1.28679857	0.98057084	0.924580775	1.1923043	1.123489965	1.129626837	1.206228543	1.146918495	1.033697513	1.134537701	1.213284724	1.231414507	1.135221339	1.190008718	0.957725661	1.186347707	1.253178528	1.190780247	1.177401779	1.112989346	1.240489021	0.982309021	1.176824924	1.15874144	1.120871287	1.158434129	1.27268881	1.015309569	1.255940601
Q9VIB3_alpha-Est8	1.004843572	1.093807147	1.064795137	1.290194237	1.157045421	0.848786636	1.11661875	0.849608407	0.941376689	1.041241202	0.881167179	1.161825452	1.263976461	0.862074401	0.93852459	0.887978142	1.135981505	0.886116249	1.078711986	1.122191565	0.924441345	1.254850133	1.222592897	1.042111476	1.011984192	1.116608499	1.001701901	0.949474804	1.050126313	1.170216726	1.05927489	1.003261078	1.240024938	0.934250911	1.286385769	0.991852673	0.950513426	1.072964374	1.093959408	1.161427952	1.065202719	1.193795446	1.016777923	1.018446776	0.883243982	0.83330335	0.924837189	0.728852589	0.928877107
Q9VGQ1_alpha-KGDHC	1.014828736	0.853374866	0.834374799	0.926593404	1.020389669	1.18749787	0.855685997	1.148919307	0.976517953	1.08505725	1.164112334	0.921730899	0.94203782	1.071027167	1.064766423	1.171999309	0.934906277	1.130213559	0.937399252	1.021186775	1.047587109	0.894812169	0.87028347	0.814226672	0.991012436	0.920922025	1.027219987	1.190181186	1.012960009	0.883461505	0.958440173	0.996592208	0.863904416	1.06532987	0.88566881	0.986347495	1.046366774	1.019932447	0.994958449	0.962896863	0.966366459	0.948762469	0.870425942	0.888988345	1.104186722	1.211343283	0.943853543	1.214963862	1.161742842
P53624_alpha-Man-Ia	1.087699766	0.983610023	1.163632008	1.100890668	1.078793089	1.023845091	1.226860949	0.837012274	0.948681961	0.967744405	0.969658305	1.186311787	1.261455433	0.981368808	0.898215943	0.99515314	1.185830669	1.052002726	0.973136602	1.104286115	1.064592438	1.223191613	1.330298193	1.001432925	1.022709134	1.116266415	0.982840414	0.964128882	1.134878225	1.078144014	0.885969706	0.964084947	1.096463148	0.947923173	1.302303714	0.977661361	0.992168715	0.918973739	1.057411512	1.103767882	0.944281013	1.242417162	1.022536109	1.038232795	0.978048129	1.033607732	0.960394357	0.965833758	0.921511142
Q9VAP8_alpha-Man-Ib	0.99895532	1.005343941	1.133558341	1.055689489	1.038813886	0.995057859	1.426078972	0.978879706	0.982552801	1.075298439	0.835629017	1.475665748	1.355477223	0.905775488	0.835547722	1.015726681	1.117543384	1.03767927	0.961538462	1.206910039	1.107040417	1.313900838	1.326465927	0.810052072	1.143875934	0.964568712	1.038816059	1.072408849	1.180868497	1.047931176	0.863135251	0.978488841	1.062516806	0.906023124	1.431283477	0.942572378	0.941216354	0.978981626	1.026239067	1.104142654	0.968811445	1.309548507	0.919692089	0.933231424	0.979020979	0.97755186	0.937062937	1.044602456	1.007956052
A0A0B4KFG0_alpha-Man-IIa	1.081038487	1.082697412	1.17476775	1.032763769	1.086844725	0.965826145	1.331698345	0.924586143	1.190680564	1.143470264	0.920907419	1.348865727	1.085695945	0.986733711	1.063228843	1.071252808	1.057344603	1.11597749	0.850256912	1.18571079	1.107903107	1.019263217	0.96287964	0.891029246	0.969066367	0.954302587	1.121330159	1.129337084	1.219000216	0.988386352	0.935254639	0.967824714	1.131859455	0.904066325	1.203667622	1.111805158	1.1452149	0.962578797	1.155587393	1.159083095	0.941031519	1.158444986	0.916768169	1.017965895	1.097259427	1.073871832	1.181640223	1.193385535	1.099108368
Q9VF33_alpha-Man-IIb	1.064342666	0.942806519	1.123781857	1.101180543	1.074479263	0.940993469	1.336058966	0.883565588	1.0014204	0.939920918	0.872432723	1.382932166	1.324712185	0.905635105	0.846381988	0.955926906	1.012596868	0.989630924	0.844583052	1.120257439	1.060744508	1.493337667	1.375969172	0.996703654	1.183527555	1.091740564	0.973399664	0.940756894	1.155558584	1.105833447	0.848657349	1.023044912	1.069566583	0.938245917	1.309855159	0.870258002	0.885120333	0.843102334	1.099796687	1.129521348	0.874497628	1.320609162	0.846336288	0.891823742	0.924260504	1.014549185	0.915091377	1.004228684	0.976604341
Q9W3J5_alpha-PheRS	1.08863214	1.023762157	1.109271673	1.096081108	1.092379288	0.977879739	1.119952081	0.958304882	1.074165918	1.033830488	0.99411201	1.156094639	1.165750508	1.052962628	0.935925989	0.987860692	1.1538021	0.982544268	1.000909431	1.08688814	1.045722998	1.153206051	1.164526353	0.998017527	1.08920499	1.056203753	0.992389073	0.99447028	1.245033941	1.058398842	0.938643985	1.047692202	1.029987947	1.008380638	1.148309875	1.068056223	1.063791489	0.963805559	1.088210607	1.183577622	0.986390696	1.084337175	0.992085024	1.015670783	1.017351318	0.931342735	0.949270386	0.935419988	0.963582309
P13395_alpha-Spec	0.993583886	0.983817941	0.958732906	0.963331989	0.992207414	1.072345832	0.985062744	0.998315626	0.987272434	1.031305248	1.009214309	1.012010096	0.997054568	1.007873735	1.020553816	1.088016991	0.997155541	1.018643686	0.924597469	0.990958512	0.928545756	0.970810266	0.998703459	0.936707993	0.971631313	0.952726206	0.999196765	1.04148052	0.901147969	0.967157895	0.945888351	0.951970614	0.958377217	1.038057805	0.979836959	0.963426345	0.963874221	0.987739639	0.931712596	0.865198295	0.962646345	0.967855531	0.958413491	0.99680365	0.970791005	1.071573952	0.958616631	1.051953383	1.030089788
Q9W0B8_alphaCOP	0.993181229	1.065443471	1.192864553	1.092492658	1.052000452	0.967357747	1.225213455	0.900249939	0.983130518	0.951432443	0.916558409	1.179866587	1.202204678	0.953129071	0.949218778	0.947096321	1.085505386	0.934253067	1.006530121	1.076529524	1.025728081	1.266847851	1.282943542	1.000270889	1.036558911	1.031700672	1.057937687	1.047690792	1.126749593	1.056416953	1.006327646	1.005937967	1.07570351	0.953373971	1.281565037	0.992292935	0.971676878	0.99075778	1.014348322	1.09029254	1.000359833	1.201587473	1.06053942	1.071781071	0.883104441	0.957132952	1.025586398	0.954268065	0.944084035
Q23983_alphaSnap	0.837581205	1.023783364	0.846647522	0.835589696	0.810712338	1.084262678	0.788738287	1.190917147	0.887496973	1.066000981	0.93930988	0.778335896	0.776460268	0.929776536	1.14965674	1.172494704	1.003978839	1.099305212	0.989431984	0.841565952	0.873195638	0.738664118	0.82596606	0.994605696	0.856925736	1.052378574	1.04399822	1.119743091	0.867682697	0.886528947	1.076516234	0.852901582	0.954145304	1.051346649	0.768675376	0.836999373	0.838544163	1.106887271	0.796939087	0.685307416	1.099096725	0.717158835	1.043292893	1.041990167	0.941219042	1.13855904	1.079701158	1.213742088	1.052861866
P06606_alphaTub67C	0.78342455	0.766223612	0.762314308	0.724784988	0.741204066	1.100860047	0.880366342	0.914710933	1.317115054	0.940469376	0.845449342	0.919862622	1.274026869	0.928005512	0.74526352	0.752669652	2.397692043	1	1	1	1	1	1	1	1	1	1.001978892	0.914028144	1.102902375	0.907431838	1	1	1	1	0.845658825	1.868657031	1.140415656	0.768329993	1.200443085	3.901360903	0.768962971	0.756872546	0.793645127	0.770439129	1	1	1	1	0.643339254
P06605_alphaTub84D	0.893472777	0.904330323	1.003726483	0.823186084	0.871602156	0.968563787	1.088777658	0.950467853	1.060954425	0.997087148	1.028417154	1.087655976	1.04070093	1.004939876	0.945860729	0.933139232	0.885778228	1.005241771	0.969931975	1.044723105	0.93021166	1.019693936	1.07158483	0.931705687	1.01592353	0.907593413	0.987161109	1.008229467	0.878740133	0.967278736	0.940936163	1.02824615	0.933229416	0.896421089	1.033626605	1.025683116	0.945247502	1.047373452	0.967112741	0.875499292	0.972466182	1.034709973	1.004206266	1.015131878	0.896587562	0.92635052	0.826377921	0.956896072	1.04230553
P06604_alphaTub85E	0.766913019	1.138146674	1.014781126	0.977259807	0.743035816	0.891984082	1.015436325	1.028133947	0.888584589	0.915224698	1.014129217	1.028445164	1.004497486	0.971102769	1.011934273	1.089843473	1.037785962	0.832220367	1.033806344	0.903338898	0.95475793	1.117070821	1.027862534	1.329372089	1.087762968	0.938734543	0.980579531	1.008528566	1.084669133	0.994143033	1.042901961	1.245568627	1.031058824	0.853019608	0.804764672	1.247530506	1.001162115	0.472399768	0.744915747	1.221382917	3.056943637	1.289325843	0.94747191	0.780149813	0.909180167	0.909671085	1.753068238	0.88610702	0.55351401
C0PVB3_Alr	0.653576203	0.882408645	0.650289661	0.770638369	0.701119652	1.681678922	0.577637704	2.251596424	0.786800148	1.106249743	1.072632143	0.638322416	0.672447389	0.922934528	1.259807742	1.427253832	0.893998441	1.219026124	0.933970419	0.851181329	0.869957741	0.667398038	0.672732748	0.97308983	0.818168129	0.870654793	1.208730394	1.534092927	1.049926014	0.720242675	1.037944687	0.739993642	0.731757362	1.017281739	0.621264156	0.892402009	0.92694349	1.078051826	0.73439673	0.807651917	0.917634036	0.491068725	0.86729236	0.866762539	0.772707396	1.353448276	1.062406297	2.18472014	1.087520259
Q9VBR3_alrm	0.945245275	0.871846731	0.888394499	0.861587115	0.954806207	1.073177907	0.977089783	1.143591331	0.966934985	1.066501548	1.074241486	1.056594427	0.934960938	0.920605469	0.920507813	0.958984375	0.898535156	1.102184376	0.945082068	1.121683327	1.021288412	1.021776165	0.994074513	1.149174135	0.989852604	0.948374195	1.045779854	1.091441415	1.118057609	0.914414148	0.879550916	0.896947523	0.858746727	0.894436673	0.950446415	0.94547252	0.984707591	0.948345639	1.025950755	0.945534308	0.852420526	1.014251425	0.813861386	0.897059706	1.016596791	1.168020818	0.838831864	1.213647535	0.995814889
Q9VNZ8_Als2	1.380558428	1.001034126	1.043433299	1.107549121	1.156153051	1.361944157	0.868822453	1.270896888	1.287370348	1.234289201	1.222696766	1.291031117	1.110998787	1.027395875	1.082895269	1.315911848	1.039830166	0.9578125	0.9125	1.049804688	1.0859375	1	1	1	1	1	1.206142942	1.243354991	1.326048435	1.128174838	1	1	1	1	0.965934337	1.033078252	1.057516663	1.004196495	1.105406073	1.053320168	0.836830412	0.990831296	0.842909535	0.975550122	0.885451505	0.969063545	0.743311037	1.046822742	1.389086595
Q9VVI1_Alsin2	1.112276856	0.925970874	1.066904165	1.008573442	1.116367836	0.856267617	1.071247307	0.936317932	0.975149629	0.86832655	1.032655016	1.206990663	1.138785367	0.89866134	0.856653051	0.883068483	1.017322083	0.867149758	0.847005742	1.073375262	1.031446541	1.178423237	1.154356846	0.951694329	1.067842324	1.037448133	0.87138032	0.857597925	1.188471451	0.962094412	0.77060576	0.945352231	0.903644188	0.88889892	1.155125848	0.996595629	0.973241642	0.867978484	1.094868478	1.156237943	0.904518735	1.151504127	0.791696037	0.878964961	1.016723895	0.899137867	0.870951805	0.91961661	0.866907609
Q960Y8_alt	1.020073352	0.990160122	1.070659272	1.039386349	1.010316963	1.052237827	1.148187642	0.997265216	1.065321821	0.933832014	0.998519874	1.168914707	1.204730609	1.018493301	0.922428154	1.039490446	1.16460491	0.979249146	0.952116568	1.05002224	1.004227143	1.225961348	1.166526862	0.987767665	0.971473296	0.967381541	1.046788256	0.996279656	1.08402057	1.016996629	0.964168615	1.02441445	0.969538912	1.016629174	1.173427785	1.154048752	1.198649139	1.056629898	1.014014418	1.148032719	0.922913037	1.164898861	1.021163104	0.999183812	0.905379877	0.996539595	0.93444871	0.99842157	0.958690361
Q9VYD9_ALT	0.959618897	1.033241414	0.878374595	0.945446578	0.949844632	1.217442333	0.814410438	1.191391999	1.076144671	1.147395952	1.027806019	0.856642964	0.830706732	1.127407889	1.370863087	1.191340015	0.99785945	1.257139073	1.160857032	0.960529801	1.079717439	0.878256754	0.835413258	1.136080207	1.035709359	0.977280428	1.214720812	1.228425636	0.918578601	0.95677212	1.197069189	1.02760478	0.976688135	1.002270172	0.843868725	1.035079472	1.123370766	1.207101384	1.015613275	0.940013007	1.152494651	0.781861398	1.076017087	1.0175517	1.015818441	1.254731273	1.157129062	1.166713784	1.190877415
P15364_Ama	1.002913025	0.910459148	1.097170204	1.063878485	1.125884311	0.758218893	1.074195436	0.870567583	1.030193095	0.833996489	0.921181978	1.244704506	1.247757487	0.808776853	0.799300796	0.846819081	0.976033856	0.943634046	0.895269792	1.063447104	1.021031015	1.155185721	1.138446696	0.939893874	1.099951761	1.036324168	0.947354636	0.788239916	1.042823468	0.956521739	0.809694299	0.913338841	0.922335445	0.912512623	1.186679219	0.843727936	0.809884679	0.796375618	1.067168746	1.054036244	0.838832667	1.331136738	0.763067246	0.786955219	0.903350515	0.799532861	0.704896907	0.746295103	0.913382796
Q9VIK0_Amacr	0.896948892	1.05300481	0.982994196	1.045145554	0.950450552	1.254454708	0.922232675	1.223079335	0.965443713	1.046785826	0.968642208	0.896268423	0.902317623	1.008788303	1.268548763	1.2528387	1.087260849	1.125868297	1.496804668	1.056682412	1.167268686	0.934218411	0.921311022	1.080671184	0.97229521	0.983635274	1.211740216	1.2132806	1.19641965	0.938551207	1.205358363	1.035585729	1.141203809	1.181573791	0.967194532	1.010668445	1.016669445	1.237706284	0.954292382	0.948924821	1.2048008	0.94647597	1.100889061	1.00417472	0.957950012	1.37087845	1.155295937	1.307783115	1.179630976
Q9VBC7_amon	1.179785656	0.941728308	0.881865244	0.911492254	1.101906698	1.122663287	0.905853436	1.120962731	1.167276543	1.0419227	1.239108521	1.097999144	1.081346227	1.259134683	1.052335476	1.132720684	0.975634172	1.062374739	0.927952063	1.135813326	1.19998773	1.156100618	0.947679585	1.000701597	1.284128009	0.986959654	1.08309961	1.074368314	1.360153305	0.914666802	0.937597824	1.133461426	0.900044257	0.992389979	0.863656092	1.104539077	1.155602435	1.010598246	1.121657768	1.069453837	0.975846093	1.030870253	0.899738036	0.920048931	1.194687129	1.101623279	0.925038544	1.129091425	1.102235086
X2JFA0_AMPdeam	1.130378393	1.134728832	1.109359741	1.10290589	1.077735651	1.111045564	1.078411183	0.966558384	1.268966003	1.054407712	1.140683233	1.070413153	1.047807785	1.117343186	1.060328274	1.127609586	1.149555583	1.05861326	1.11427487	1.139716668	1.237529723	1.18276444	1.115694286	1.042710248	1.202808535	1.070233726	1.114175758	1.118711398	1.342773267	1.071486657	1.04388882	1.233296124	1.09712962	1.106055133	1.127061998	1.186672844	1.149465465	1.109743827	1.147882414	1.107581611	1.14361022	1.036997953	1.150147629	1.177080669	1.050662697	1.065175278	1.091818888	1.024253303	1.124576613
Q7KLE5_Amph	1.088294239	0.897534608	0.918396251	1.008574327	1.054595713	0.861793664	0.977293079	1.001555232	0.994288702	0.953781546	1.019863782	1.099110844	1.10382925	0.975458818	0.932178319	0.943110605	0.945298893	0.958604594	0.882285387	1.080747473	1.071022288	1.077420273	0.995248881	0.92259664	1.111561809	0.985591607	0.908391498	0.921481775	0.855324104	0.949196346	0.849436682	0.996024452	0.927425097	0.967173005	0.932731856	0.967811147	0.974844278	0.862200836	1.049225168	0.952193063	0.894378893	1.066153585	0.867629311	0.893384346	1.088515347	0.908517992	0.910007045	0.91980224	0.928330006
O18645_AMPKalpha	1.066480213	0.960282252	1.027726878	0.994229595	1.092953355	1.03176134	1.066305613	0.997443944	1.057245533	1.049501443	1.104747684	1.076858835	0.943737735	1.10282812	1.088237331	1.166755166	1.076024472	1.031746032	1.0036106	1.101301179	1.026704816	1.070105879	1.071966509	1.143600762	1.033956497	0.99563638	1.070368512	0.978491317	1.075903478	0.861027044	0.989391971	1.113069834	0.955650399	1.051431929	1.089524151	1.07343848	1.000776653	0.987050811	1.065149207	1.09782836	0.982405831	1.014674669	0.913013247	0.944741272	0.970806961	1.036764376	0.895991381	0.979365863	1.046044616
Q9VYV4_Amun	1.041200761	0.89729968	1.079803276	1.027907948	1.062961073	0.867953417	1.140614931	0.933259689	1.036592102	0.963776121	0.931924883	1.264567799	1.225854224	0.915994162	0.866951408	0.928313874	1.135946085	0.88206598	0.932008049	1.051466553	1.006463809	1.213991154	1.174465396	0.98714623	1.077172503	0.973377898	0.929285889	0.919997909	1.125326735	0.959362911	0.849092475	1.023230253	0.998782046	0.953301845	1.137586219	1.001299782	0.973189837	0.85497903	1.075681952	1.279175765	0.877647222	1.11713347	0.884337017	0.898122832	1.058709945	0.813237846	0.846723535	0.843497177	0.882217838
P08144_Amy-p	2.015851043	1.151398908	1.231122051	1.358188731	1.912906999	1.133281341	1.686049349	1.612506711	2.124516304	1.235673897	1.809882379	1.462283949	1.396928509	2.056167314	1.026380417	1.441393828	1.087119883	1.224502965	1.276963227	1.750353105	1.9802333	1.376090075	0.899809791	1.347856924	1.898004417	1.040282412	1.18916663	1.159946279	1.96151022	1.205213975	1.356156596	1.771189392	1.123053745	1.094429324	1.196923271	2.02080172	2.276895841	1.256974437	2.193927279	1.986352671	1.196850317	1.456870409	1.176060984	1.121995842	1.785049704	1.069844091	1.274561817	1.281047529	1.12179862
X2J8C3_Ance	0.87365079	0.797144662	1.013388964	0.816763359	0.963190793	0.998067895	1.064308546	1.155823399	0.85260647	0.930061527	0.844284753	1.339982696	1.314682124	0.861215094	0.895558759	1.048508353	0.892219791	0.868492232	0.894463898	0.916018423	0.811943052	1.190766202	1.127018402	1.155841212	0.844445107	0.795025202	0.933037723	0.991767042	0.965440106	0.841105228	0.857247062	0.869755143	0.80005305	0.879801396	1.086588891	0.862195393	0.902422753	0.860253719	0.8715458	0.973505372	0.792197508	1.401584838	0.804808171	0.783191522	0.91155389	1.031928616	0.784355383	1.114911655	0.838834675
Q8SXX2_Ance-3	0.859306171	0.761377844	0.715515932	0.835796829	0.868572029	1.515160721	0.759832636	1.635946072	0.979562994	0.98125523	1.21781497	0.840669456	0.817563778	1.17925795	1.03598076	1.446215817	0.847408943	1.145764618	0.953185907	1.137368816	0.942091454	0.827502962	0.792505924	0.885352488	0.825562796	0.819253555	1.120682423	1.371728914	1.133625523	0.806855049	0.968994469	1.01831103	0.826518039	1.060721552	0.740565689	0.963407429	1.246387514	0.967506093	0.871439825	0.861605494	0.878541713	0.802358603	0.844774282	0.861071863	0.992516935	1.425961408	0.869182143	1.63909298	1.033490945
A1Z7M8_Ance-4	1.064822967	1.044682724	1.165649959	1.046349286	1.143575876	0.720882334	1.180801837	0.825075151	1.073023272	0.812341676	0.922552099	1.329820651	1.3488	0.962340741	0.752414815	0.818844444	1.049451852	0.800119332	0.83424821	1.23973747	1.057120127	1.167706168	1.183264033	0.955474705	0.987283437	0.999341649	0.801407794	0.825932613	0.967665375	1.025863643	1.013789061	1.058241046	1.055927445	0.668137089	1.365693855	0.982304258	1.038531344	0.940723801	1.131620023	1.16586809	0.850611637	1.293191832	0.927049222	0.984672622	1.185431202	0.852840871	0.904709895	0.843947128	0.765016244
Q9W0Z1_Ance-5	1.030245909	0.884671408	0.823237083	0.948719047	0.976865736	1.086325079	0.853848865	1.069828324	1.128681468	1.053365554	1.096057997	0.916628908	0.927518745	1.115315005	0.99232957	1.027320521	0.998965785	1.094958968	0.892614302	1.175146542	1.073153576	1.112735974	1.023398032	1.115837986	1.151732695	1.046530178	1.114032539	1.19063529	1.247385241	0.884999032	0.940461124	1.124965608	0.87872118	1.077367523	0.893671774	1.089074746	1.14317464	1.007954147	1.067961165	1.018364721	1.002105509	0.909971835	0.953929721	1.019346835	1.259703488	1.211766094	1.038066774	1.205985292	1.078814172
Q9VVJ0_anchor	1.318428184	0.89701897	0.779810298	1.006775068	1.597560976	1.299457995	0.724014337	1.008960573	1.20609319	1.112007168	1.03046595	0.887992832	1	1	1	1	1	1	1	1	1	1.162895928	1.518665158	1.514705882	1.172511312	1.500565611	1.092075126	1.077874485	1.107650023	0.863490609	0.902676399	1.100567721	0.637469586	0.96107056	1.261503928	1.58698092	0.823232323	0.918630752	1.316498316	1.426487093	0.925364759	1.438110749	0.956840391	0.823289902	1.351443124	1.259762309	1.098471986	0.983022071	1
Q0KIE7_Ank	0.974896306	1.023689011	1.041113929	1.018501839	1.003852442	0.898749792	1.047148635	0.951719959	1.00388946	0.907405879	0.94443024	1.055748933	1.086417555	0.956228162	0.928480182	0.987343378	1.017043153	0.911735688	0.945021368	1.039172653	0.972349604	1.037347929	1.081805296	0.957221821	0.993000886	1.037974352	0.952012551	0.945557283	1.088713164	0.96170604	0.901077706	0.960370782	0.986473079	0.976003934	1.057084681	0.932507549	0.869114314	0.950567299	0.959648456	0.974242873	0.976410177	1.017785707	0.955805323	0.987767125	0.926942248	0.940882519	0.949765381	0.950714443	0.93473193
M9MRX4_Ank2	1.037526288	0.953843091	0.930235541	0.921695969	1.037402461	1.019961954	0.959858682	0.960350911	1.00471913	1.017164816	1.013931061	1.034688187	0.995260615	0.991167045	1.009836419	1.058703954	1.021467006	1.030494698	0.915859722	1.05968462	1.00714497	1.036109278	1.004268371	0.945585268	1.037910546	1.027357359	1.026038291	1.035466277	1.095512398	0.949136836	0.931415431	0.99896486	0.937356892	1.029047787	0.951307568	0.973204037	0.971666054	0.953107671	1.014179089	0.975922164	0.951776072	0.981825087	0.924621903	0.966138494	1.040224462	1.030240898	0.956053928	1.012145306	1.018535324
Q8MQX9_Ankle2	1.041599802	0.945809159	0.932107147	0.997284286	1.093198371	1.020491297	1.061546098	1.008561856	1.138726889	0.984613476	1.019977665	0.972329073	1.005142857	0.917428571	0.785142857	1.044285714	1.311142857	1.400102722	0.815100154	1.068823832	1.289676425	1.196769852	0.997577389	1.011036339	1.062987887	0.898250336	1.120656576	1.126199105	1.267320401	0.991686208	1.055073126	1.127285192	1.012340037	1.21320841	1.024274719	1.280402605	1.178093546	0.924689165	1.123149793	1.527531083	0.911663706	1.038938593	0.879320862	0.948759658	0.909310437	0.943117789	0.899382882	0.956533405	1.108922364
Q9V3Y0_Ankrd49	1.020392661	0.916208952	0.951306922	0.988508434	1.024073858	1.05360134	0.960389084	1.147284518	1.010888949	1.035017563	1.036557687	1.056336125	1.065547438	1.012021348	1.012850407	1.089590134	1.053681538	1.013412963	0.922948894	0.946495007	0.987517133	1.072950907	1.063275368	0.994115152	1.084349486	1.016196586	0.892930567	0.835973274	1.016400336	0.760209326	0.909360318	0.947307553	0.971232382	0.960245754	0.963567113	1.042534947	1.096615949	0.919217501	1.077671645	1.118750872	0.931461503	0.958299758	0.945155117	0.915793715	1.106430708	1.090229312	1.003988036	1.16331007	1.030974742
A8DZ26_anne	1.005784526	0.858098337	0.85538684	1.053506869	1.092190889	1.09725235	1.244204019	1.007727975	1.190108192	1.383307573	1.00309119	0.650695518	0.982302247	1.052631579	1.051169591	1.115420129	1.004309018	1.118654822	0.94606599	0.981916244	0.951459391	0.999441341	0.870391061	0.929329609	0.967877095	0.816480447	1.076548236	1.158092771	1.205094991	0.969096965	0.936702485	1.15883143	0.968435191	1.06212223	1.093376327	1.023713556	1.033454252	0.990863899	0.950624748	1.027677012	0.91683461	0.971838051	0.789681118	0.854962379	1.071513471	1.041204437	0.967313788	0.985736926	0.966479401
Q9VWD5_anon-18DEc	1.051372977	0.997226769	1.116225677	1.114248045	1.068603382	1.039916348	1.278038427	0.941633155	1.009327525	1.013851653	0.991621984	1.17873101	1.122559068	0.941013054	0.966069695	0.960756284	1.103705901	0.967986644	0.916730127	1.006560834	1.056440747	1.261383835	1.249523317	0.990627929	1.140063989	1.085188896	1.144472489	1.005603231	1.183038869	1.026476527	0.90428647	1.017110602	0.99996472	0.996930676	1.212491903	1.036349594	1.022024017	0.953734616	1.063755045	1.089217201	0.950919328	1.188187359	0.986999534	1.015020459	1.038283802	1.019799219	1.014421162	1.015058561	1.118137415
M9PAY6_anon-21Cb	1.017361538	0.937171948	1.02599842	0.985394541	1.034178882	1.026893707	1.1025558	0.975714121	0.956586099	0.947473112	1.038903666	1.076581473	1.223001032	1.070436692	0.975983284	1.113180099	1.055783321	1.054743141	0.994015761	1.1654937	1.081503645	1.182245575	1.10562032	0.886232131	1.013891253	0.965197413	0.994403398	0.98106446	1.100628235	1.261115781	0.942195491	1.025426781	0.979903479	1.044496867	1.143867157	1.028331764	1.053119918	0.950885903	1.055499444	1.086946846	0.883677138	1.072388345	0.972626503	1.010878833	0.902012427	1.097680722	0.856291712	1.0379216	0.939727515
Q9NK57_anon-35F/36A	0.974091623	1.120370153	0.899028876	0.978513288	1.017780488	1.102308179	0.890195889	1.154032336	0.829944816	0.894504147	0.914222093	0.896295221	0.889145911	1.06326322	1.125002241	0.886814783	1.061165205	0.914577823	1.072928591	0.950124344	0.920045001	0.860504361	0.942036405	0.938206295	0.999772469	1.12681077	1.073568374	1.121313061	1.246034102	0.973373789	0.903887977	0.952742888	0.972826328	0.986041454	0.899305247	0.930092845	0.910901401	1.149784715	0.937091182	0.959711938	0.99636747	0.823401315	1.096138084	0.926385742	1.044783617	0.945981698	1.051958708	1.215537378	1.044202272
Q9V3I6_anon-35Fc	0.70510227	1.303214205	1.501011463	1.236682401	0.799505507	0.868060238	1.5626703	0.666212534	0.580381471	0.885558583	0.564032698	0.979564033	0.852775008	0.737121967	1.109006314	0.871385842	1.255234297	0.904490829	1.123655914	0.723592663	0.809930424	0.954179868	1.186936388	0.766268584	0.892273946	0.856202778	0.989258312	0.949872123	0.944757033	1.02455243	0.853162897	0.860701409	1.118977384	0.790560472	1.940275651	0.815138919	0.505141107	1.134762634	0.7551958	0.834609495	1.079413695	1.127352151	1.037130376	0.996303763	0.728902628	0.548068006	1.110973725	0.836785162	1.068599034
Q9VJ11_anon-37B-2	1.203431074	1.140588879	1.272113396	1.190138703	1.149196983	0.951606035	1.313553878	0.778759167	1.081044912	1.025667791	0.893233767	1.247524222	1.207965152	0.898029454	0.868533499	0.897739058	1.066749637	0.951407202	1.053715793	1.118801608	1.021118845	1.244993565	1.336422136	1.006100386	1.08018018	1.141029601	1.002156733	0.990745361	1.194363522	1.165907518	0.92355524	1.082335615	1.065399405	1.020427087	1.454412551	1.152504903	1.01322874	1.035229096	1.139276163	1.249527545	1.033446247	1.319365357	1.075631479	1.138828053	1.04619951	0.906547081	1.075235514	0.835763754	1.00040689
O76206_anon-84Ea	1.058832362	1.117251787	1.116133101	1.11808517	1.073202595	0.838030813	1.172478218	0.869130974	1.002627857	0.958355887	0.899652529	1.186560388	1.078201742	0.867249882	0.840995149	0.800387694	1.1363157	0.879646582	0.941761606	1.081639006	1.028188954	1.135804612	1.14132063	0.958539863	1.118549377	1.14317216	0.871855693	0.850768884	1.146083427	1.070304397	0.907316335	0.986391736	1.084855787	0.965120183	1.106027894	0.928677857	0.893085203	0.88067364	1.065727057	0.980452675	0.985763952	1.129003269	1.05063448	1.069258301	1.027271614	0.79744587	1.016261905	0.797170245	0.954785318
Q59E43_anon-AE003501.1	1.085960083	0.975223675	0.97577426	0.863248451	1.104267034	1.003028217	0.912804039	0.886798225	0.982025394	0.777114885	1.029371271	1.137448371	1.082892416	0.980246914	0.972839506	1.065432099	1.068077601	1.509135201	0.808769793	1.171741778	1.209500609	1.162006579	1.019736842	0.870888158	1.282072368	1.181743421	1.0262611	1.017381447	1.21188362	1.063385604	1.10188487	1.028527764	1.024961793	1.018339277	1.166280391	1.076573506	1.015678255	0.981867757	1.018450352	1.177641445	0.964917064	1.11646778	1.104216388	1.009546539	1	1	1	1	1.010435225
A8DYI9_anon-EST:fe1H12	1.334725476	1.148416013	1.456453092	1.278190893	1.252623001	1.054191708	1.495756458	1.141881919	1.059594096	1.087638376	0.904243542	1.608671587	1.16906032	0.982355355	0.846327452	1.053959787	0.966557243	1	1	1	1	1.238492726	1.232768901	0.999046029	1.048414023	1.038635822	1.095209818	1.038598575	1.173198733	1.062945368	1	1	1	1	1.435312024	0.927291886	0.961597003	1.051399134	1.04156422	1.120828943	0.94625922	1.140648813	0.88700196	1.025691269	1	1	1	1	1.060093102
Q59DP4_anon-EST:fe2A9	1.139266072	0.80374732	1.301649939	1.09529876	1.255631855	0.785663238	1.513187162	0.948363521	0.95900858	0.776453765	0.879408961	2.03558945	1.550957716	0.927538851	0.762197326	0.948500181	0.936754608	0.841269841	0.818197911	1.141736	0.993745206	1.941462661	1.608695652	0.916595876	1.100007723	0.981388524	0.975879116	0.878917152	1.107487441	0.973207878	0.692830979	0.982208268	1.314495029	1.068550497	1.304642265	0.910913216	0.89377984	0.73768327	1.083804558	1.248061491	0.766024447	1.663906282	0.824176934	0.831044233	0.924557803	0.842959054	0.778950454	0.897488518	0.854256376
A0A0B4LGI9_anon-EST:fe2C9	1.122685185	1.252645503	1.21031746	1.095568783	1.146825397	0.88260582	1.180985915	1.068873239	1.219577465	1.013380282	0.925492958	1.391408451	1.274565115	1.051245886	0.975552421	1.11490362	1.154301834	0.84324914	1.076445414	1.105731308	1.110094823	1.266847932	1.112643232	1.008448242	1.058943484	1.081666343	0.987702347	0.969506839	1.279332413	1.084326766	1.090852981	0.907542279	1.084310579	0.863350204	1.10411333	1.069807134	1.058713091	0.922683052	1.14234511	1.23724185	0.911759686	1.334198443	0.932721102	0.958474745	1.063937807	0.811835634	0.920196732	0.883706172	0.9737744
A0A0B4KGY1_anon-EST:fe2G11	0.898225644	1.002745229	1.164512889	1.085637764	0.870706394	0.971677268	1.164469914	1.083094556	1.029608405	1.10582617	1.066093601	1.227698185	1.233473443	1.081008789	1.031333588	1.165074513	1.119984715	0.880782795	0.901528248	0.951593942	0.93548164	1.214963919	1.132928219	0.881124193	0.958602355	0.878465629	1.015727227	1.036612984	1.125314545	0.945646704	1	1	1	1	1.070220941	0.929682997	0.920461095	0.927857829	0.953986551	1.013928915	0.950048031	1.111259838	0.861915725	0.843229641	1.06333729	1.055112769	0.990079702	1.099372562	1.047208373
A1A714_anon-EST:fe3A8	1.160965261	0.900822063	1.031291435	1.186157518	1.255900292	1.009016176	0.984002723	0.761742682	1.164737917	0.955752212	1.184479238	0.975833901	1.070433437	1.255675955	1.125644995	1.210784314	1.223942208	1	1	1	1	1.126649596	1.003939334	1.04490841	1.003348434	0.978136695	1.016862955	1.141059957	1.253479657	0.984207709	0.944983819	1.118662352	1.083063646	1.250269687	1.240348692	1.110004151	0.967413865	0.940846824	1.060813616	1.107305936	0.927563304	0.983004759	0.840244731	0.890324043	1.159712482	1.105539972	0.892706872	1.129558205	1.079783211
Q9W4R9_anon-EST:Posey113	1.056381795	0.9754035	1.088244388	1.035789376	1.152742564	1.217147981	1.080766743	1.213441424	1.067987689	0.958551707	1.083398381	1.179274739	1.191527124	0.929161201	0.864315662	0.958227229	1.073488181	0.924713983	0.906370623	1.019699551	1.010884306	1.219276504	1.151456139	0.96965271	1.069915317	0.990941548	0.94911642	1.003501338	1.141651972	0.996054651	0.944747887	1.093715863	1.047806589	1.050537573	1.097223557	0.974129531	0.900360951	0.879815544	1.009058095	1.177758259	0.883521129	1.153027584	0.879508687	0.915091321	1.043791497	1.015836984	0.889599386	1.186569471	0.878474478
Q9VHK7_anon-EST:Posey161	0.697510355	1.367175879	0.990843094	0.722184118	0.694054247	0.61056429	0.730197329	0.673231015	0.620510265	0.522423759	0.565696631	0.546900538	0.453423068	0.394868159	0.898210208	0.50534912	1.060672461	0.542906022	1.060538536	0.732069179	0.727583778	0.907383403	0.686198778	0.928529228	1.150525118	1.038967223	0.418131896	0.61371583	0.567274209	0.98608539	1.439746462	0.444124835	1.678800529	0.512396905	0.604006201	0.623866987	0.598006018	1.193142649	0.59460166	0.469746801	1.166248214	0.445291793	1.637572658	1.380388282	0.563437847	0.501578704	0.654441256	0.925407925	0.510730688
Q9VZ01_anon-EST:Posey214	0.950014846	1.113428116	0.927760093	0.974347997	0.923182091	0.793665371	0.86736452	0.881261502	0.983830872	1.002008041	1.060107068	0.901383829	0.905955715	0.947487565	1.000205245	0.931689767	1.007080939	0.836117192	0.969464913	0.838421872	0.904876056	0.832545277	0.884264803	1.036143587	0.977634021	0.901824257	0.85921433	0.837420416	0.677835903	1.072565275	0.999830386	0.951293443	1.019587674	0.991612317	0.844145927	0.894495709	0.936845444	1.042631675	0.929896798	0.936387292	1.07666418	0.813286837	1.09605071	1.089938564	0.95991984	0.776823336	1.167461414	0.866692813	0.908168403
X2JES6_anon-EST:Posey230	1.694968932	0.866426138	0.805011024	0.807857286	0.924032872	1.035598316	0.827840458	1.113018404	0.949199776	0.996400441	1.044297796	0.945522807	0.910074193	0.957122851	0.942403385	0.990077769	0.882959387	1.012120811	0.805868327	1.035004636	1.004205855	0.986401997	0.924426483	0.873148698	1.036942827	0.978105313	1.068787003	1.056516889	1.317850299	0.916225724	0.891050958	1.016183412	0.867931798	1.107889413	0.903046328	1.096127362	1.089351622	0.943094805	1.094254393	1.033162563	0.915826585	1.057323969	0.942128785	0.977380518	1.175704308	1.218551362	0.918229616	1.192340893	1.14066206
Q9VZ66_anon-EST:Posey262	1.032149408	0.826746707	0.91955978	0.899483075	1.063598466	1.017108554	1.046712371	1.295539704	0.867578895	0.962974271	0.900635599	1.128313303	1.212010816	0.887065275	0.884023135	1.122699617	1.047359724	0.91874764	0.8519767	0.984547759	0.915349765	1.085516877	1.008495054	0.872611946	0.923015933	0.855848373	0.903558394	0.925547445	1.01975365	0.884215328	0.795376339	0.848688993	0.848834392	0.903067901	0.983242387	0.830804436	0.859003697	0.803555712	0.950008801	0.966308748	0.749339905	1.190623326	0.737650888	0.75862069	0.970457055	0.898962243	0.797262089	1.252594392	1.016705171
D5A7R5_anon-EST:Posey267	1.135144199	0.890342052	0.938631791	0.974849095	1.248826291	1.051643192	1	1	1	1	1	1	1.299807816	0.932415119	0.875400384	0.900064061	1.009609225	1	1	1	1	1.804147465	1.474654378	1.716589862	1.523041475	0.993087558	1	1	1	1	1	1	1	1	1.401065137	1.115116755	1.099959033	1.08725932	1.292912741	1.299467431	0.941417452	1.242400624	0.959915377	0.959135954	1.348758465	0.733634312	1.081264108	0.828442438	0.961864407
Q9W5T4_anon-EST:Posey268	1.112349811	1.076593388	1.197129855	1.079555031	1.152175483	1.00616407	1.127553273	0.958520205	1.062393977	1.009179002	1.069597751	1.170404108	1.177543311	1.04650254	1.005373193	1.168913638	1.097824671	0.994728636	0.896478333	1.108174326	1.003291509	1.186270332	1.130992968	1.143493856	1.062770793	1.018129839	1.054657935	1.049146073	1.192059627	0.993336405	0.943510928	1.027282951	0.99656111	1.001140864	1.109410917	1.04178398	1.041035895	0.97770705	1.101005155	1.063641681	0.943784769	1.123539164	0.956957776	1.013528726	0.975548574	1.033803366	0.968023185	1.024938506	1.036002725
Q9VY24_anon-EST:Posey66	0.895813603	1.000936289	0.821803702	0.98063926	0.934890228	1.738796814	0.807073076	1.329530039	1.159528041	1.237514854	0.954886269	0.767595932	0.720492801	1.030250794	1.691289799	1.488981275	1.146082607	1.483942703	1.392662504	0.959647951	1.084055459	0.771716671	0.801671921	1.37186072	0.883933737	1.003058104	1.459854799	1.519997422	1.253300684	0.948656815	1.605820804	1.004383816	1.107460024	1.181909535	0.772284882	1.237963091	1.261135008	1.552280521	0.942020655	0.899274515	1.26433626	0.764813177	1.192942936	1.140055997	0.932141361	1.573204877	1.248396129	1.524956458	1.420825398
Q8IMJ0_anon-EST:Posey81	1.073063399	0.917334031	0.875477949	0.93984797	1.05423605	1.097499512	0.951364988	0.920887997	1.082390959	1.124288345	1.047766953	0.967871663	1.001300356	0.968166003	1.019255161	1.151647118	0.969594359	1.112009395	0.942664897	1.091267545	1.087330224	0.894618021	0.968768393	0.882233421	1.037577101	0.965994759	1.091350696	1.152209086	0.990399437	0.95301844	0.893210655	1.019796656	0.87971599	1.084039156	1.03733075	1.090021715	0.920878396	0.963673394	1.041478611	1.011521048	0.962449261	0.985814348	0.936109284	0.964519286	1.082590424	1.148915968	0.927666708	1.101023955	1.053422597
Q9VDI6_anon-Liu	1.189969956	0.926970187	1.115784608	1.244048995	1.28218165	0.972036053	1.397073663	0.775227043	0.876892028	0.989404642	0.998990918	1.22653885	1.203853955	0.739350913	0.873225152	0.804513185	1.009127789	1.436781609	0.935960591	1.426929392	1.598522167	1.252131547	1.369062119	1.070036541	1.3136419	1.011571255	1.0041841	0.936192469	1.306485356	0.930962343	0.861434251	1.11088205	0.948461199	0.974230599	1.304600083	0.974996546	0.868904545	0.841828982	1.087719298	1.154717502	0.799005387	0.914879792	0.838206628	0.826835608	0.946395985	0.776916058	0.721943431	0.792883212	1.049081697
A0A0B4JD05_anon-WO0118547.140	1.113326915	0.928345482	0.957089809	0.984046211	1.156649704	1.109888599	0.873108834	0.980478282	1.087115666	1.026598341	1.027330405	1.090775988	1.069758065	1.014314516	1.027620968	1.078225806	0.984072581	0.952160494	0.912037037	1.239814815	0.980555556	1.229770127	1.153180085	1.017833213	1.200494794	1.088135244	1.01034749	1.004015444	1.146100386	0.92988417	0.926102503	0.989719905	0.942342074	1.067640048	1.112264514	1.066993464	1.083621684	1.004036909	1.122933487	1.003652441	0.980007689	1.081604562	0.937370957	0.940713794	1.036444886	1.103177756	0.949652433	1.039622642	1.116713046
Q0E9D9_anon-WO0118547.141	1.469598965	0.96334627	0.985554118	1.038594222	1.296463993	1.070288918	0.985552519	1.038266302	1.242092932	1.203045685	1.166731745	1.310816087	1	1	1	1	1	1.023751818	0.867668444	1.354823073	1.415899176	1.206243496	1.025390219	1.012486993	1.386056191	1.13735692	1.073872895	1.077131993	1.587724063	1.018468224	1.088589136	1.382792563	0.93292016	1.277068903	0.882175682	1.198734368	1.287931294	0.797046859	1.253879765	1.33659786	0.835618502	1.195914091	0.899249171	0.87218439	1.401459854	1.133819951	0.789132198	1.00648824	0.92157426
M9PDX3_anon-WO0118547.182	0.976711883	0.925820847	1.275290363	1.148210539	1.211602683	0.917752756	1.032857528	0.945865877	1.116213305	0.939806087	0.989361702	1.169674118	1.136770281	1.141925701	0.965276725	1.072175891	1.152084913	1.070342205	0.917141952	0.998732573	1.008713561	1.109492427	1.009712105	1.235749798	1.067175396	0.997687594	1.06592827	1.063291139	1.249868143	0.994330169	0.938321537	0.923154702	0.777553084	1.102123357	0.995490849	1.025817099	1.002652442	0.901712298	1.07300109	1.049836433	0.919984675	1.079428484	0.879628207	0.911430327	1.030936455	0.991743311	0.952550167	0.995923913	0.910095545
Q9VJ06_anon-WO0118547.200	1.241860465	0.835215947	1.11627907	1.162126246	1.139534884	1.333554817	0.905274489	1.053103696	1.315034087	0.997488339	1.128812343	1.127377108	1.074294205	1.093610698	0.838038633	0.962852897	0.924219911	1.377703827	1.394342762	1.417637271	1.634775374	1.038343281	1.040332791	1.164224995	1.181226262	1.027491409	1.218346253	1.139534884	1.485788114	1.15503876	1.16970547	1.178120617	1.190743338	1.640953717	0.983331146	1.08636304	1.067331671	0.818742617	1.218007613	1.112481953	0.949730936	1.05304878	0.841158537	0.819512195	1.571106095	1.41986456	1.188863807	1.276899925	1.151626765
B7Z098_anon-WO0118547.243	1.021775083	1.127012128	1.262421904	1.222712238	1.024329291	0.841767732	1.345000912	0.820090111	0.960127093	1.147745918	0.832434826	1.365158736	1.254454757	0.9707413	0.944360506	0.93949205	1.16782982	0.945209289	1.169169796	1.1478932	1.204144069	1.175575238	1.351031748	1.455085128	1.04587657	1.057986845	1.033507074	1.02278481	1.149069248	1.230856292	1.101669969	1.086866686	1.372799321	1.10769884	1.322449041	0.956094208	0.990017335	1.001449579	1.039048957	1.193526212	1.173262	1.101418262	1.283515833	1.147517472	0.954460127	0.878745742	1.122297156	0.814503233	0.992653042
Q9W0B2_anon-WO0118547.268	0.964390818	0.795383839	0.81728748	0.826410494	1.077650719	0.784116707	0.984684575	0.928041814	1.089461529	0.878935213	0.987966452	1.083627082	1	1	1	1	1	1.174958814	1.192421746	1.166886326	1.239209226	1.230505303	1.143792888	1.015907673	1.164379289	1.064878353	1.064154543	1.009420463	1.197471977	0.955521107	1.101163046	1.012069344	1.046741277	0.897300856	1.245615427	1.212205381	0.953733831	1.038647726	1.058011269	1.303150544	0.885802714	1.088314268	0.753485122	0.748335602	0.967291967	1.156565657	1.024170274	1.04040404	0.94288291
Q9VHN7_anon-WO0118547.344	1.025190758	1.336660877	1.473800758	1.367465683	0.985032005	0.876093983	1.256061676	0.861551285	1.136240725	0.968119994	0.781463088	0.961648469	0.969589293	1.082441621	1.152177315	1.026653919	1.342985313	1.10436304	1.499496057	0.961237075	1.211560033	1.0992869	1.138055564	1.231210025	1.090862973	1.406166687	1.149164152	0.801343662	0.946631311	1.507584266	1.3487468	1.128938521	1.416549805	0.919609635	1.144713542	1.050888677	1.150428052	1.252289061	1.141489459	1.014262214	1.264981803	1.036544174	1.430047171	1.468329093	0.896599944	0.890739574	1.434623112	0.705706804	1.010811881
Q9VNF5_anon-WO0118547.367	0.9854491	0.806643349	0.805728917	0.868710422	0.982111424	1.184852434	0.838371665	1.365500006	1.075429093	1.075213437	1.123507846	0.907622829	0.874272342	1.066301009	1.091282726	1.209741115	0.985593096	1.119147758	0.924398982	0.94527234	1.041305364	0.955956116	0.885126314	0.969595291	1.0242207	0.938457662	1.112864382	1.210363563	1.213638903	0.88050787	1.024652435	0.96224265	0.880403403	0.97682899	0.832280998	1.064681316	1.084045938	1.024945312	1.002137814	1.027194989	1.022757781	0.85528755	0.936907663	0.96303818	1.069472047	1.164113515	0.99981484	1.253015023	1.123581515
E1JIV0_anon-WO0118547.372	0.897701058	0.857290589	1.116339193	0.97613555	0.954975738	1.100071593	1.388147718	0.89520495	1.070378964	0.882347254	1.00725058	1.363302398	1.093549558	0.812537819	0.79390052	0.886481907	1.027108798	1.633802817	1.469014085	0.963380282	1.301408451	1.429048149	1.342443985	0.942475767	1.044334975	0.989988877	0.942182622	0.92260666	1.037851197	1.123439126	0.836982109	1.846751412	1.173846516	1.401600753	1.424593479	0.895441907	0.980874547	0.922150139	0.954461201	1.071488752	0.935209369	1.543287218	1.097711651	1.118593927	1.114874816	1.176730486	0.93078056	1.290132548	0.964918011
Q9V9U3_anon-WO0118547.398	1.022193671	1.048572007	1.129273855	1.06467429	1.051980484	0.916682737	1.135852947	0.946784114	0.89391192	0.954333476	0.881891607	1.093380384	1.048913361	0.819841913	0.943666915	0.909709979	1.159469757	0.960890843	1.014397467	1.003438074	1.020692114	1.088764512	1.194352465	1.075248705	1.034621843	1.158401791	0.972366678	0.933397185	0.962297564	1.072968032	0.933096418	0.9138148	1.063161318	0.997252216	1.176644794	0.914507105	0.899555443	0.938347686	1.008908884	1.075261876	0.972623373	0.993025809	1.030457352	1.045160901	1.001612802	0.875999748	0.99196743	0.900320674	0.937033392
Q9VHW5_anon-WO0118547.426	0.995777971	0.994784552	1.036259779	1.076989942	0.992301006	1.087545014	0.944804469	1.110837989	1.269050279	0.996201117	1.14726257	1.082458101	0.743776824	0.969098712	0.884120172	1.036051502	0.829184549	1.022758463	0.900388838	0.987534309	1.035795974	1.056261343	1.033877798	0.886872353	1.08892922	1.014317403	1.103492063	1.073015873	1.234603175	0.951428571	0.877591164	1.076562264	1.019821456	0.975034044	1.001526252	1.051078551	1.118945869	1.071326821	1.110805861	1.02991453	0.921347171	1.10935774	0.882120877	0.936405239	1.001322314	1.110082645	1.032396694	1.001652893	0.962814186
Q9VJZ1_anon-WO0118547.80	1.031355268	0.963939786	1.18172581	1.058734524	1.119479143	0.849430657	1.20788408	0.868137314	0.941493088	0.844471404	0.867932266	1.282504315	1.285804496	0.912414751	0.924160141	0.862402122	1.098446577	1.012088102	0.925394903	1.112402047	0.991916545	1.412877671	1.247229362	0.939235599	1.08312615	0.989254562	0.916741216	0.917126816	1.134898356	0.987969275	0.922728892	1.008015675	1.056465978	0.964161026	1.225488677	0.96998223	0.964496287	0.880275208	1.059917073	1.214380098	0.896222718	1.210773854	0.981566923	0.943728844	0.961555978	0.871149766	0.907872083	0.894698257	0.869079524
Q960E4_anon-WO0118547.91	1.103129718	0.844435346	0.986129949	0.966706758	1.087621875	0.817437367	1.118084228	0.908959538	0.978736581	0.965111478	0.945809249	1.162365813	1.031283711	1.081445523	1.214131607	1.234088457	1.040453074	1.030315969	0.791204099	1.168374609	1.209507543	1.153248435	1.032016692	0.986617742	1.031728901	0.922872149	0.900918426	0.866030997	1.126124115	0.995981887	1	1	1	1	1.159459648	0.94492027	0.919991644	0.823178516	1.066267437	1.152914142	0.920246965	1.047192502	0.853860828	0.864642946	0.970401281	0.831238779	0.762385366	0.844388374	0.786005023
Q7K4G8_anon-WO0140519.201	0.912411404	1.09422341	1.096170829	0.988791015	0.861076515	0.837843346	1.023808048	0.868745737	0.892677785	0.891871784	0.896273793	1.005952012	0.997308093	0.848471692	0.812261202	0.885637374	0.973341438	0.905176832	0.963352127	0.904493422	0.835725269	0.850664779	1.094282392	1.175521966	0.827511248	1.189221981	0.864570641	0.895331882	0.98569802	0.939795857	0.934546407	0.830737007	0.99009469	0.92276476	1.04319613	0.954250499	0.871659499	1.035574413	0.935512978	1.035747197	1.093034864	1.07355093	0.905873921	0.949681966	1.073004489	0.922916895	0.969752546	0.957516698	0.903246476
Q8IRC2_anon-WO0140519.252	1.008856183	0.755660653	0.848038858	0.827331824	0.967880359	1.111770506	0.932099327	1.316559032	1.240312898	0.839366927	1.399763507	1.045479352	1.106364356	0.933814029	0.826157629	1.120660193	0.76380611	0.82792887	0.752022315	1.118270572	0.82109484	0.979911808	0.949877511	0.757373836	0.844292014	0.742234199	0.900294083	1.005034702	1.106316904	0.75878132	0.82447836	0.975143809	0.819362782	0.988792426	0.819615528	1.160488988	1.106196342	0.914949608	0.822191116	0.879022023	0.75664427	0.994532275	0.844216709	0.820658627	0.837665507	1.028189639	0.854628104	1.194246141	0.779826329
Q9VAQ4_anon-WO0140519.6	0.908088539	1.007749911	0.775238829	0.92466206	0.967320981	1.236406684	0.798815825	1.452103705	1.007589486	1.178397775	0.890822643	0.842056159	0.819608122	1.012849638	1.142268919	1.281319513	0.995953429	1.20698577	1.029095613	1.022721392	1.093661061	0.835816716	0.776275526	1.068281366	0.820656413	1.037320746	1.121388927	1.163875051	1.137063179	0.911702535	1.068015219	1.049961071	0.93576014	1.028410677	0.753318299	0.94337951	1.00652384	1.128253866	0.96498067	0.966720361	1.14273518	0.878162838	1.164207775	1.048306593	0.951839177	1.194014839	1.06118397	1.305593291	1.231519883
Q0E938_anon-WO0153538.32	1.120174538	0.939322382	0.941170431	0.970123203	1.132802875	1.192813142	0.656497783	1.091251176	0.9801102	1.004569278	1.258567397	0.976616046	1.107105809	0.98340249	0.927385892	1.125259336	0.986514523	1.030125523	0.801171548	1.125857741	1.078995816	1.071499503	1.080436941	0.897715988	1.132075472	0.987090367	1.078150419	1.11181329	1.284695282	0.975409836	0.99567474	1.456314879	0.84083045	1.083910035	0.885513447	1.041198044	1.133435208	1.005012225	1.076650367	1.004217604	0.887469438	0.959451072	0.899248328	0.968898697	1.064882165	1.25574629	0.852487635	1.163223742	1.130095254
Q9VAC1_anon-WO0153538.36	0.83703891	0.929288489	0.769781821	0.892002999	0.851142148	1.116004849	0.797166815	1.246938692	0.941851715	1.008082379	0.994788261	0.795693701	0.7923509	1.005834962	1.162189509	1.058728207	0.88950623	1.132491417	1.019050208	0.846358054	0.929334874	0.783938563	0.778192259	0.984869415	0.870446619	0.806973562	0.995681727	1.059605688	0.84776056	0.903195265	1.043232856	0.93599037	0.871297637	1.029311466	0.776113469	0.908220695	0.989574914	1.089351135	0.912004917	0.825574977	0.96244312	0.780755356	0.970522558	0.956986054	0.983166023	1.150511057	0.955448227	1.197324675	1.082309511
Q9VSW7_anon-WO0172774.118	0.996157541	0.903191376	1.002739531	1.04059487	1.038068808	0.879638524	1.047802127	0.879533513	0.957964885	0.945149302	1.033961297	0.98923491	0.88171312	0.87536823	0.992748697	1.009064129	1.0140494	0.931147541	1.057923497	1.104918033	1.07431694	0.990814344	1.163928635	1.142465995	0.914591062	1.198021551	1.099321431	1.064908312	1.250949188	1.043379918	0.983691623	0.888806523	1.06498641	0.91895231	1.145113118	0.985409729	0.970853788	0.996944626	1.029077552	1.117752068	0.94376738	0.982546724	1.026688968	0.999563668	1.005181879	0.966599969	1.017290031	0.918013442	0.861184286
Q9VSC5_anon-WO0172774.138	1.058222964	0.932355819	0.955405711	0.972211767	1.019262388	0.971950287	0.967718008	1.060927026	0.973727763	0.941653141	0.973121603	1.047447948	1.101798975	0.918587906	0.927508295	0.999097127	1.0269598	0.947730053	0.895268942	1.030094818	1.020585729	1.096076847	1.024492365	0.943310911	1.081110035	0.986283026	0.992447284	0.995251054	1.143986689	0.947970177	0.973709128	0.986836553	1.007070593	0.981026728	0.980597245	1.049871454	1.027743963	0.909433299	1.067946999	1.129178844	0.912149245	1.054081138	0.880083019	0.915670089	1.023319271	0.947729109	0.903123598	1.020747689	0.937715239
Q9Y114_anon-WO0172774.24	0.977586902	0.92365557	0.917905582	0.950976905	0.998049746	1.137976004	0.967858533	1.197838212	1.016490121	1.070776947	1.018833499	1.030135328	0.974902636	0.983818275	1.00668673	1.08838392	1.018877338	1.007864313	0.950103065	0.988494802	0.994958774	1.008543015	0.996023839	0.949843951	0.952956112	0.979537319	1.04746776	1.124293467	1.114499129	0.924841147	0.984183528	1.023056783	0.926643987	1.043041109	0.983309902	1.019749949	1.036161879	0.983167059	0.977099983	1.016938194	0.974581432	1.030205765	0.909212355	0.954731699	1.058981715	1.140188085	0.948186772	1.171066518	1.048799874
Q9VTY5_anon-WO0172774.52	1.12234957	0.868051576	1.001575931	1.115186246	1.103724928	1.021060172	1.130357143	0.968154762	0.897916667	0.966666667	0.767559524	0.936011905	1.080152672	0.872431004	0.931591309	1.049324721	1.066940693	1.089202521	1.010961907	1.032748698	0.977939161	0.901332223	0.927560366	1.039134055	0.785595337	0.935886761	0.966588967	1.047979798	1.137917638	0.983877234	0.957847946	0.956315144	0.991263029	1.1246168	1.109671695	1.069565217	0.955279503	0.934161491	1.05039929	1.130434783	0.881100266	1.072629828	1.161522824	1.077065237	0.997113997	1.188311688	0.75036075	1.213564214	1.024153166
Q9VTZ7_anon-WO0172774.58	1.165921223	0.934641466	1.022796133	1.050353484	1.075313808	1.091040254	1.012205045	1.022511527	0.750474641	0.904529428	0.947111473	0.912937347	1.135328562	1.019518543	0.929733247	1.085881588	1.035133377	1.123255814	0.888837209	1.24	1.382325581	1.00768896	1.02002031	1.07355288	1.033802408	0.974611925	1.100670338	1.111683026	1.241800335	0.958343309	0.742160279	1.159117305	0.703832753	1.198606272	1.162383345	1.199282125	1.087006461	0.992677674	1.101507538	1.221679828	0.974730797	1.060731447	0.90950347	0.981980779	1.217559093	1.257838881	1.088277858	0.926676315	1.146886526
Q9VTY2_anon-WO0172774.89	0.997312966	0.914243647	0.863229436	0.906135219	0.954622777	1.152146078	0.864019372	1.266791014	1.035346346	0.938802446	1.064502582	0.926130445	0.873481757	1.033445439	0.977197293	1.116073934	0.98817875	0.909665784	0.942602908	0.876657637	0.98484664	0.87489764	0.878312487	0.99509689	0.952266881	0.982796642	0.914233448	1.038039648	0.97874369	0.864859686	0.969922347	0.955163274	0.929409072	0.965593245	0.858762996	1.056086479	1.109817435	0.97040726	0.993514049	0.991066476	0.927422495	0.917573821	0.898255092	0.923876789	1.030722237	1.046372059	0.930121794	1.254154787	0.948034264
Q9VDT5_anon-WO02059370.13	0.98633842	1.022849005	1.314301352	1.164751955	1.05484824	0.97694376	1.436984444	1.081084962	1.057050924	0.898784736	0.805589682	1.433176439	1.456609014	0.947019276	0.971588253	1.057174086	1.083551022	1.148587331	1.016499222	1.06136503	1.143691335	1.4948998	1.419269001	1.047034196	1.11252964	1.05108479	1.047945859	0.947326861	1.088064147	1.074311577	0.970830105	0.97287607	1.095862384	0.840355164	1.35695596	1.000680937	1.02976577	0.921093282	1.145941175	1.133690615	0.915090949	1.533040233	0.967386117	1.001009161	0.961235209	0.965721875	0.948241825	0.967707972	0.980900763
Q9VR30_anon-WO02059370.23	1.124631118	0.942688093	0.977501826	0.960423667	1.176932067	1.063637692	0.977444411	0.883786437	1.086626691	0.955198242	1.112383168	1.023707908	1.047266929	0.946656791	0.983729631	0.988387275	1.008461596	0.958928405	0.893568562	1.065191823	0.899318585	1.080837985	1.035714286	0.944844622	1.064489365	1.000791975	1.037161076	1.040938806	1.210106098	0.92747294	0.937861169	0.978611686	0.973760434	0.919540558	1.026775161	1.164147164	1.028653901	0.95102833	1.13860376	1.125987583	0.969280729	1.107292898	0.881200245	0.934732765	1.118159556	1.067681479	0.934201297	0.958308209	1.074836188
Q95T49_anon-WO0242455.53	1.032176597	0.99003835	0.979640196	0.98561095	1.103280017	1.2697752	1.050655279	0.947332253	0.955872969	1.089088499	0.999214647	0.921955529	1.042653441	0.979851209	1.034624923	1.172628642	1.053936764	1.077346423	1.053051713	1.075660667	1.05766275	1.000641997	1.012968337	0.981792969	0.995095144	0.999614802	1.073244796	1.13439798	1.207789119	0.976091172	1.016795341	1.117296492	1.050115129	1.219626168	1.027841614	1.018169794	0.917004216	1.000892783	0.979251054	0.983962966	1.042241878	0.97654363	1.017838292	1.025925462	1.010738296	1.127855687	1.057250631	1.094910717	1.045371345
Q9VPW3_anon-WO0257455.15	1.233208955	0.949626866	0.960677382	0.977037887	1.229190586	1.035304248	0.838659392	0.892439595	1.139127046	0.901792673	0.928682775	1.101714731	1.238685679	1.065096094	1.075635462	1.032858029	0.903905766	0.989186912	0.904788653	1.655525909	1.20713383	1.340394449	0.948867787	0.895544193	1.279035793	0.875821768	1.07938856	1.036982249	1.227810651	1.024654832	0.739043382	0.983537264	0.7810901	0.786429366	1.011138614	1.265558699	1.121640736	0.849186704	1.151343706	1.270862801	0.861209335	1.374747339	0.924268966	0.965638054	1.390273556	1.037082067	1.003647416	1.134650456	0.959297889
Q9VWJ0_anon-WO03002137.1	0.895187871	0.975609756	1.14370468	1.110085695	0.978246539	0.94528675	1.026932494	0.890521161	0.724379154	0.942287513	0.799580273	0.842602308	1.012443615	0.911183699	1.078394774	1.060040442	0.996422461	1	1	1	1	1.033642691	1.146171694	1.321925754	1.356728538	0.941415313	1.082907966	1.073163186	1.178190255	0.905568445	0.98436453	0.822872459	0.95599732	0.974759884	1.297604423	0.898187961	0.939496314	1.031326781	0.976197789	0.936117936	1.036547912	0.982329843	0.844895288	0.977094241	0.783086053	1.006231454	1.064094955	0.977151335	1
Q9VES8_anon2A5	0.946872482	0.911426781	1.189978812	1.032386821	1.014966129	1.06288609	1.272481363	1.117030544	0.941516821	1.052898943	0.961148757	1.299072962	1.225958727	0.917725581	0.92635377	0.97099217	1.009555185	1.002824211	0.921036786	0.99397884	1.015253606	1.299719394	1.31107918	0.955455544	1.04934322	0.990565143	1.027073388	1.057405021	1.166560781	1.037383602	0.901444327	0.910875821	0.975188974	0.931941786	1.258826217	0.850130836	0.954404801	0.886536385	1.00559686	1.109673534	0.930480562	1.233738628	0.904968398	0.898043439	0.993384411	1.030130138	0.957046214	1.047151357	1.022982184
Q9VRG6_anox	1.074469237	0.927642981	1.053319974	1.058113085	1.080453856	1.001706023	0.98705449	1.048477955	1.017982884	1.125501029	1.001570794	1.005470697	0.959962373	0.969251573	0.932682697	1.050091128	1.06896349	0.949541016	0.90171315	1.028591475	0.955855698	0.963535912	0.9029546	1.228441028	0.94071583	0.96709104	1.028	0.9044	1.1	0.832	0.93400604	0.92141121	0.918170435	1.005818664	0.961941937	0.91661923	0.971212491	0.973272614	1.012875769	1.08121222	0.992301645	0.972022015	0.899980343	0.956624296	1.068156396	0.909624771	0.968222493	0.936928005	1.104734187
Q9V895_Anp32a	1.165774025	0.96979442	1.182987581	1.113396637	1.15852375	0.801389246	1.165903945	0.804679095	0.891372417	0.814490101	0.816127945	1.153090226	1.339923162	0.912234299	0.835299342	0.803753113	1.16744213	0.815598149	0.795137791	1.127101353	0.981436248	1.242044301	1.308356718	0.941309929	1.039863076	1.112066392	0.827495144	0.797345785	1.099987561	1.037536	0.836769822	0.962277971	1.079912104	0.887474821	1.224022197	0.916577812	0.826842922	0.781890661	0.987507876	1.18663064	0.841249455	1.215075	0.887875	0.9315875	1.017792379	0.733146844	0.823523672	0.807504025	0.843016621
O62526_Ant2	1.083792638	1.180882636	1.1307381	1.03888996	1.002698015	1.025746772	1.026108727	1.090844063	1.224606581	1.123748212	1.370171674	1.043633763	0.870001619	0.637688198	0.996924073	0.823053262	1.174356484	1	1	1	1	1.457831325	1.265060241	0.953528399	1.323580034	1.351118761	1.0585045	1.149549965	1.371336257	1.02215555	1.010298445	1.171710803	0.989071038	1.07986549	1.140979921	1.169470502	1.092022637	1.000658966	1.220327157	1.086828436	0.988448717	1.178564196	0.937221547	0.99681045	0.969261949	1.032764736	1.080476271	1.160445871	0.976559418
Q9VZ19_antdh	1.164075212	1.126016995	0.835081058	1.14156572	1.174441029	0.892514916	0.796424025	1.011278529	1.118705781	1.110535508	1.004499571	1.054261271	0.936041541	1.087230472	0.993350853	1.001203179	1.241807301	1.003698225	1.198395539	1.194526627	1.352526172	1.147829314	0.89528757	1.094768089	1.210983302	1.099666048	1.054072612	0.980831402	1.304980974	0.970474637	0.991855891	1.230209124	1.00942094	1.05459314	0.797984306	1.144445684	1.242924616	1.105321879	1.370783592	1.266726171	1.261408011	1.001359351	0.961302346	0.984104363	1.0213173	0.979452906	1.33871649	0.913165544	1.017693381
P22465_AnxB10	0.972995236	0.911179115	0.762598108	0.865368114	0.970081188	1.105203546	0.7447005	1.144715455	1.048232254	1.052868353	1.067427199	0.851295257	0.792627587	1.027426742	1.029816849	1.13669803	0.943134347	1.034223662	0.948465435	0.917142664	0.997842619	0.829220419	0.791990503	0.944833338	0.977362029	0.947208913	0.895971259	1.027712638	0.932492076	0.766534401	0.959072133	0.984584164	0.872913763	1.045068793	0.742163873	0.979098289	0.999716918	0.937551756	0.933813263	0.829994782	0.94834916	0.803618445	0.920510628	0.939329099	1.10276128	1.107309423	0.969951151	1.155636971	1.055190985
Q9VXG4_AnxB11	0.971099023	0.98034616	0.984316471	0.959220152	1.088252582	1.112635528	1.031298125	1.084364612	0.983385589	0.878782847	0.963756296	1.015364179	1.046721226	1.000307866	0.940209687	1.04938376	1.045905888	0.911711567	0.967433765	0.982783878	0.931522664	1.039684899	1.021760381	0.934901788	0.957856947	0.959028858	1.007858276	1.0400234	1.049305049	0.942952422	0.952791753	0.987569554	0.982052318	0.950223317	1.010579819	0.984209177	0.975095672	0.966659434	0.943924988	0.957624834	0.945848292	0.994568793	0.968342391	0.991268593	0.894814374	1.017262815	0.90951527	1.176049068	0.938809777
P22464_AnxB9	1.02152579	0.84727611	0.890078942	0.895906898	1.14084401	1.016028546	0.926523022	1.102671408	1.004294531	0.90449173	1.011510041	1.032665668	1.021069071	0.987220364	0.7956233	0.85981245	0.721647981	0.891470999	0.848985302	1.00321794	0.969232175	0.909362884	0.908499175	0.833121127	0.931044271	0.764071628	0.606631007	0.893422631	0.633906714	0.979881996	0.810772777	1.014063456	0.833516993	0.93231904	0.932733036	1.066966888	1.093606529	0.917872209	0.986532308	0.985192255	0.904302685	1.025857914	0.862893315	0.899380535	0.958891862	0.889950053	0.75818067	1.083937196	0.852836913
Q7KSM5_Aos1	1.039328224	1.014511969	1.122700909	0.989508034	1.060669355	0.854256723	1.13517274	0.836328291	0.992677897	0.881227982	0.939025233	1.179411271	1.215602631	0.933632078	0.90949194	0.92390735	1.127119828	0.881212387	0.86955754	1.06246998	0.962803379	1.231611937	1.173729754	1.036981362	1.077828933	1.028283781	0.905159668	0.894977391	1.046637744	0.948980693	0.925563327	0.964959437	1.052031117	0.936344284	1.115930422	0.939007035	0.887094451	0.943190002	0.981297642	1.150183509	0.972637862	1.085238936	0.974705698	0.977116251	0.919597168	0.856355006	0.948283661	0.847793745	0.873315521
Q9VF53_AOX1	1.006382686	1.300870706	1.039189924	1.244985449	1.032408175	1.014151593	0.976328589	0.868216348	1.262562017	0.919329809	1.014750712	0.849141928	0.885987704	1.210666787	1.145946415	1.161606385	1.342821496	1.041538128	1.337696514	1.028679527	1.321810012	0.944740037	1.050839804	1.381942692	1.205168187	1.246702811	1.112362808	0.97177001	1.293792586	1.1919844	1.243762002	1.266015161	1.281829589	0.957493383	1.007780676	1.279904944	1.249728163	1.252220483	1.15982148	1.08813076	1.271361502	0.842000303	1.34748922	1.367431725	0.931317824	0.890584131	1.320268244	0.88211866	0.997282654
Q9VF51_AOX3	1.050790558	1.012448188	0.895175643	1.013858421	1.075165118	0.887895353	0.872087796	1.050985074	1.161035048	0.896179083	0.920375752	0.942769403	0.963036744	1.077274587	0.949564938	0.974211446	1.055775211	0.915338846	1.025325337	1.067937025	1.223895867	1.000849228	0.878224603	1.040923541	1.214003015	1.007203838	0.967435094	0.927275185	1.160667958	0.96538152	1.014071661	1.122124631	1.015833559	0.929139285	0.832258483	1.066065173	1.117608173	1.031536148	1.147544497	1.054381932	1.063822401	0.961199281	0.976813318	1.003726246	1.03058883	0.917921735	1.021384563	0.958265902	0.943710087
Q24253_AP-1-2beta	0.939208928	1.090647407	1.052081454	0.941434568	0.937707089	0.942450395	1.013255374	0.847103183	0.986951757	0.892824824	0.950069379	0.991887707	1.029643557	0.98080818	0.966097261	1.003866744	1.056624293	0.958810889	0.986131645	1.019223418	0.969800387	1.002225664	1.057743489	0.961956753	0.995282425	1.056332169	0.988863101	1.017918234	0.988501264	0.997805309	1.017127497	0.979523574	1.067796213	0.955458938	0.994745862	0.89852275	0.840473102	1.027005554	0.884874101	0.850536423	1.038326676	0.953756477	1.058609047	1.066512333	0.876661667	0.921701844	1.020045548	0.941762271	0.876537074
Q7KVR8_AP-1gamma	1.124791947	0.924680986	1.084275184	1.063192518	1.172124911	1.004224459	1.187242735	0.869409458	1.053788275	0.974891962	0.935895462	1.171937712	1.292477587	0.947483425	0.926039781	0.96692409	0.964835424	1.022071912	0.948657094	1.207052727	1.159744472	1.229787234	1.238566752	0.942284311	1.150596212	0.985410334	1.02224278	1.024897434	1.240748934	0.990688601	0.903236253	1.148881538	0.977769553	1.007182678	1.335732946	1.120034919	0.908369545	0.954806934	1.106640521	1.171703682	0.938513456	1.305834672	0.906559337	0.948862575	0.967739867	1.011873076	0.920456003	0.971523858	1.004645918
O62531_AP-1mu	1.007349998	1.001801113	1.144161846	1.040743369	1.00296547	0.982425499	1.123401297	0.996547729	1.021223355	0.987025023	0.993836886	1.131858202	1.219615241	1.023835613	0.955412718	1.025089525	1.053364662	0.998682397	0.941949749	1.057202138	1.03091066	1.187411398	1.181053848	0.984166103	1.044633705	0.984809492	0.966706744	0.976686901	1.067896347	1.00762441	0.909042512	1.075706569	0.971079621	0.943912941	1.204343444	1.066617795	1.0190942	0.926211857	1.095093008	1.13688949	0.910095757	1.151163591	0.943567543	0.974240912	1.004767623	1.055210246	0.934960211	1.004496869	0.978218497
B8A403_AP-1sigma	1.013631053	0.942619759	0.998831624	1.162534078	1.03180579	1.00298585	1.247368672	0.911987427	1.072772301	0.935466971	0.921750726	1.13454303	1.254596582	1.070156464	0.851323095	1.041098854	1.133967842	1.040348743	0.914233577	1.14098405	1.021559881	1.207932011	1.213031161	1.024200728	1.070983408	0.978713072	1.015732041	1.048008448	1.161598657	0.986732014	0.915407855	1.02534692	0.995954734	0.988939526	1.115258359	1.129118541	1.036838906	0.872583587	1.037325228	1.05993921	0.839027356	1.06931744	1.391574135	1.257103201	0.884852314	0.859224451	1.157044701	0.94862581	0.952464937
P91926_AP-2alpha	1.080148508	1.013486775	0.988596927	0.928913086	1.054469814	0.999523828	1.029232226	0.883380936	1.078293291	0.952903	1.043196944	1.059119488	1.034433758	1.014050524	0.956017067	1.032659124	1.050516081	1.017834104	0.954320895	1.126952612	1.074212941	1.039838239	1.05277688	0.933777561	1.033677026	1.037456293	1.012437948	1.024232553	0.884001566	1.007681615	0.954161377	1.063291927	0.982201904	1.001249984	1.029263658	1.060475134	0.962781131	1.000858507	0.966957186	0.853989092	0.907338402	1.046096958	1.003255276	1.038987978	0.982123676	1.020599888	0.996665982	0.976557196	0.946279831
O62530_AP-2mu	1.029960087	1.017432344	0.985369635	0.903714784	1.04145624	0.952132735	1.039377546	0.90799237	1.08470648	0.956145149	1.030607642	1.059915249	1.031365175	0.955728723	0.926191585	1.002393662	1.012992996	0.939081734	0.982632393	0.982893369	0.961089171	1.017808738	1.057674478	0.878498935	1.02942644	1.014066514	0.98666873	1.001766662	1.020009536	0.973242732	0.942532811	1.07889765	0.949105631	0.983787574	1.060971614	1.056091235	0.967636119	0.966449141	1.05051366	0.934588985	0.926461412	1.03059293	0.988302418	1.015756124	0.93613831	0.955477908	0.946226012	0.945759741	0.968230257
Q9VDC3_AP-2sigma	1.173470956	0.966332553	0.979989335	0.968447501	1.117885775	1.051355284	1.099773402	0.940345667	1.16438896	1.044263979	1.066994131	1.116317856	1.277406884	1.01003552	0.883204234	1.023466142	0.957354389	1.024710558	0.909834852	1.119578365	1.118195956	1.042759953	1.063584969	0.838182922	1.080074101	1.002411486	1.01724761	1.044060387	1.084203777	0.951328981	0.95202549	1.06283967	0.946667866	1.054584816	1.100310219	1.129023723	0.992855839	1.001916058	1.060629562	1.028020073	0.981304745	1.047384632	0.93869285	0.947274249	1.072071483	1.090278426	0.958310769	0.9534089	1.061648781
Q9VAS9_Apc	1.144805018	0.960185438	0.962367058	1.034633215	1.108262885	1.088628307	1	1	1	1	1	1	1.086410055	1.016234616	1.09505106	1.247970673	1.120712228	1.1633535	0.904926534	1.097666379	1.061365601	1.001212611	0.942198868	2.289814066	0.936540016	0.85004042	1.254526643	1.257113295	1.469736161	1.088463528	1	1	1	1	1.014250191	0.968917368	0.935252487	0.858454476	0.971499617	1.017214996	0.897188217	1.049714751	1.062754686	1.057049715	0.953398058	1.159223301	1.244660194	0.87961165	1.125962845
Q9V831_APC10	0.952463696	0.939183319	0.88060072	0.901203922	0.906913243	1.005088743	0.770784103	1.045542427	0.894522019	1.208592911	1.119011815	0.929323308	1.094590846	1.411650485	1.396116505	1.470457698	1.311234397	1.209507042	1.218309859	1.226672535	1.070422535	1.243539823	1.055575221	1.186548673	1.142300885	1.061238938	1.074065634	1.090018232	1.281563355	0.937329079	1.334801762	0.844346549	0.83113069	1.618208517	0.895000329	1.166326329	1.163032738	0.954680192	1.129240498	1.159936763	0.971806864	0.892326192	0.885002186	0.862811544	1.068554731	1.11575635	1.009665093	1.118453585	1.449591281
Q9VJG0_ApepP	1.031247815	1.104645878	1.165175138	1.074245788	1.054424771	1.000694784	1.174986059	0.907030613	1.011538956	0.973876489	0.940846762	1.127521913	1.14517363	0.975807505	0.931322424	0.965553918	1.215297345	1.000374642	1.014910742	1.050507952	1.022921831	1.149197056	1.196041039	1.104784209	1.058464369	1.095968551	1.051669797	0.989808805	1.14113377	1.048770577	1.011419834	0.993898482	1.078849812	1.018401522	1.177556697	1.015189542	0.96164892	0.987340371	1.029498896	1.149315213	1.025978141	1.095576858	1.079636374	1.098888553	0.96626638	0.953634495	1.028405407	0.987141916	0.971081719
A0A0B4KG15_aPKC	0.966352225	0.988843497	0.980375845	0.961345911	1.007071232	0.977954394	1.04702599	0.893406593	1.111791383	0.978806907	1.054822955	1.110099424	1.174014368	1.059523392	0.993516734	1.084405117	1.05650955	1.016477463	0.919816066	1.06983762	1.076807013	1.104175702	1.075516541	0.960255365	1.071162153	0.992800514	1.006825229	1.036672614	1.130770697	0.982278656	0.897596556	1.026186775	0.994882219	0.991821117	1.091272666	1.035838629	0.99607833	0.99787738	1.039643814	1.056611832	0.990862379	1.009232288	0.978412738	1.000431992	0.951137212	1.04505586	0.959205304	1.00315802	0.973352375
Q9I7R5_Apl	1.030696466	1.131414121	1.149361368	1.125220975	1.045588115	0.983773722	1.11112678	0.789698209	1.030813708	0.892081512	0.931673953	0.918981808	1.241862031	1.028671168	0.983927844	1.011748445	1.330905676	1.008606787	1.056156314	0.970394011	1.078072216	1.095421687	1.151593039	1.125479697	1.128067827	1.111735832	1.011987391	1.053194046	1.213426443	1.100959839	1.065577232	1.078160628	1.080673085	1.018072798	1.302473443	1.186388861	1.040164379	1.029264835	1.133508346	1.366552576	1.10957144	0.975812458	1.183991538	1.168319824	1.006779546	0.97584574	1.11143665	0.8889892	0.997148006
Q9W0K0_Aplip1	1.048112654	0.927439859	0.976921572	0.977117152	1.087424213	0.987482887	1	1	1	1	1	1	1	1	1	1	1	1.044690447	0.939319393	1.198441984	1.144321443	0.912568306	1.161202186	0.760473588	0.965391621	0.837887067	1.255083655	1.123552124	1.29034749	0.996653797	1.148989899	1.414141414	0.962121212	1.494949495	1.116598589	0.888971407	0.819160787	0.894541404	0.951355366	0.9506127	0.857779428	1.115803815	0.753405995	1.084468665	1	1	1	1	1.104452055
Q9V496_apolpp	0.814208682	0.902117801	0.83295778	0.795223544	0.914572513	1.13977124	0.820506637	1.028338746	1.046507476	1.093661225	1.200494068	0.915520863	0.87355481	0.950269318	0.937614401	1.268921085	0.843158314	1.059932204	0.942495736	0.886932236	0.884572389	0.832123678	0.782750369	0.986116204	0.694982931	0.746653645	0.867035455	1.153580563	0.738329967	0.707829908	1.092788655	0.933601518	0.802769723	0.918952292	0.837995376	1.031689701	1.030121038	1.165861502	0.901201588	0.782954225	0.935320263	0.971231638	0.990474538	1.001602655	1.020385486	1.30439445	0.883936218	0.970755609	1.035768893
Q7KTG2_Apoltp	0.783483087	1.007894415	0.865193105	0.911943653	0.821487009	1.40916133	0.842678053	1.422397842	0.957181691	1.197012721	0.984704007	0.724245017	0.746482824	0.916651611	1.069314157	1.573033401	1.052550814	1.064059754	0.973119649	0.804149806	0.88745091	0.739388417	0.837192935	1.057022393	0.806349387	0.979736604	1.130360981	1.424221156	1.002565221	0.955670338	1.084097621	0.910534092	0.882685535	1.190400293	0.933203471	0.962921737	0.980752476	1.168035416	0.826680625	0.787927175	1.063591922	0.7222664	1.045525963	1.039910864	1.008222671	1.412113486	1.043507051	1.430708443	1.177047533
M9PEU5_APP-BP1	1.045834371	1.019158043	1.098802056	1.044905908	1.052356258	0.97606377	1.097678737	0.948994119	1.082110802	0.956112659	1.113432374	1.196626431	1.051291379	0.934400388	0.8923649	0.958974981	1.129178287	0.956969662	1.067078377	1.040497467	1.036484717	1.191420534	1.214439756	1.06774496	1.082794187	1.111908111	1.003702825	0.984049371	1.186233088	1.034464752	0.973391109	1.000320976	1.077323062	0.985491895	1.161490215	1.131297911	1.04961106	0.98721112	1.106247528	1.257811764	0.988190534	1.016196472	1.038016052	1.017109627	1.005978855	0.982136347	1.00419249	0.943346701	0.985354596
M9NGF6_Appl	1.196052973	0.995975071	1.016554142	1.001622955	1.143274474	1.012204622	1.144649579	1.020702635	1.08630579	0.941297724	1.114357412	1.430543108	1.389261364	1.020511364	0.938920455	0.956534091	1.060340909	0.925486708	0.866488783	1.2088151	1.068880324	1.322311447	1.195244843	0.842072115	1.156668241	0.994961423	1.00056013	1.002576598	1.28913908	0.970705204	0.914651688	1.120213713	0.951161038	0.983081033	1.068578426	1.098581488	1.152413512	0.88503929	1.169149913	1.190172467	0.873813654	1.360374415	0.896307852	0.849817993	1.180999181	1.014742015	0.784329784	0.942533443	0.954421077
X2J8L3_Aprt	1.168048915	1.106124175	1.030236012	1.062043993	1.199390726	0.81006277	0.985655655	0.759666841	1.302337746	0.942783567	1.040437774	1.10682815	1.069648065	1.209041416	0.814505153	0.866750924	1.138129496	0.877209621	1.032567462	1.215936645	1.395512319	1.184306208	0.975689532	1.159767544	1.263672737	1.032586372	0.924498066	0.83669184	1.541241481	1.017793332	0.951749903	1.393167213	1.069455703	1.006755249	1.031030315	1.349985686	1.300203582	0.956102682	1.331361135	1.284791806	1.074450488	1.088379874	1.100074836	1.104755756	1.300507639	0.806961205	1.116929956	0.71734002	0.984332772
Q7JVG2_Aps	1.034790556	0.991134806	1.085209444	1.099314547	1.049230769	0.923259711	1.09332809	0.96133176	1.029449032	1.075239219	1.003757592	1.140822301	1.140613847	1.00253787	0.927987945	0.92925688	1.12483147	0.930350519	0.962752669	1.09796351	1.134188811	1.148495486	1.071013039	1.256920762	1.152006018	1.084854564	0.977662386	0.944355681	1.258956554	1.003748541	1.01592946	0.897256795	1.083257738	0.868046736	1.165882454	1.025722189	1.06784156	0.931046283	1.182251119	1.205064591	0.97131206	1.05301068	0.984086151	1.007948054	1.130287117	1.067012957	1.080512586	1.092242708	1.091669855
C0PDF4_Apt1	1.011537994	0.971917466	0.892964297	0.979771399	0.949817596	1.180662951	0.912794744	1.15756192	1.115096678	1.168082741	1.101834247	0.936348821	0.867326208	1.093344884	1.127694864	1.22604334	1.02865273	1.13799613	1.029938696	0.907640453	1.035621305	0.848492576	0.896548507	1.057808933	1.004932482	1.035762047	1.14482084	1.169881884	1.166873823	0.95378692	1.052516418	1.005070876	0.962570459	1.131195161	0.892296921	1.035700533	1.093149813	1.061274564	0.997549527	0.973738563	1.037498608	0.867076997	0.998807627	1.018942795	1.056292269	1.186247227	1.028025365	1.117571815	1.168749074
E1JH55_AQP	0.598040287	0.899683095	0.862346556	0.978836557	0.425782246	1.179798201	0.869935572	1.156176434	0.598113617	1.09430368	0.870214348	0.550489407	0.544718217	0.647704477	1.136425571	1.25235608	0.98164339	1.091868976	0.929048514	0.516817982	0.551533816	0.511653946	0.915954481	1.013779078	0.583954115	0.916937069	1.130854333	1.154456054	0.879102643	0.91462815	1.042850944	0.683445433	0.870362335	1.088630939	0.971809394	0.677681727	0.694204318	1.123025167	0.581654814	0.630456075	1.089341226	0.578780825	0.937331781	0.92525642	0.765455171	1.247971278	1.009934589	1.24152855	1.171459738
Q9VA73_aralar1	0.933545055	1.257183041	1.080750705	1.17179714	1.010434862	1.542526598	1.018947114	1.266483057	1.196334569	1.309419242	1.073554141	0.852098941	0.823213675	1.116477151	1.379974779	1.322774174	1.232398581	1.339227808	1.399163845	0.967822638	1.166092336	0.871405182	1.017949248	1.298316345	0.997098592	1.160905088	1.364146594	1.250348537	1.215983553	1.188968797	1.414762283	1.203096032	1.220008512	1.176109853	1.080162166	1.141718166	1.199221452	1.347440968	1.035543398	1.01352442	1.330793421	0.84547753	1.323386625	1.305964143	0.947649364	1.343001317	1.352560062	1.246550324	1.369078557
Q7K1U0_Arc1	0.84334769	0.581222789	0.547680352	0.564884603	0.933547119	1.485979121	0.522168041	1.970868875	1.032433496	0.691769368	1.264021023	0.741403297	0.766917504	1.040152749	0.758063308	1.250416503	0.690674079	0.728990046	0.613877645	0.852631177	0.807925355	0.853324589	0.620643324	0.71437483	0.729170332	0.63818999	0.731870334	1.162576111	1.013938673	0.497965157	0.735095458	0.956661115	0.528009575	0.697908384	0.537790827	1.145491347	1.276791672	0.738711686	0.747898038	0.786522977	0.665843676	0.729087541	0.574360605	0.607831765	0.778039642	1.242264926	0.658891306	2.167230682	0.810360983
Q7JV70_Arc2	0.833542714	0.738902848	0.672005863	0.707391122	0.992881072	1.663630653	0.558454693	1.812095469	0.905946602	0.682847896	1.111852751	0.901496764	0.600843795	0.936715374	0.872710434	1.517802017	0.664540029	0.763791009	0.564520049	0.833535844	0.767679222	0.859090909	0.661570248	0.879752066	0.877479339	0.755785124	0.979215474	1.326545323	1.036222743	0.709857632	0.914193831	1.085513814	0.716415729	0.960970618	0.672524897	1.070225542	1.074545987	0.846880492	0.872949619	0.858816637	0.801772115	0.659264244	0.634813818	0.660311051	0.866837115	1.431660807	0.787365505	2.251731118	1.006272174
Q9VDT1_Arc42	0.879777162	1.031567592	0.837334965	0.950663361	0.90882334	1.350991821	0.774749226	1.41174596	1.030496344	1.116708231	0.966021617	0.794018846	0.816831453	1.080292743	1.363858843	1.313865297	1.015930506	1.294024444	1.231561886	0.892019528	1.048488055	0.839110173	0.807056007	1.217022112	0.981596464	1.101897072	1.304857248	1.338459116	1.233205626	0.915744726	1.258495382	0.985834793	0.984592297	1.044512807	0.814828415	1.045550376	1.141642062	1.243558999	0.994219711	0.963150033	1.160196939	0.764264558	1.094167105	1.077776716	1.04885113	1.282461587	1.208328121	1.36158025	1.260154486
P40945_Arf102F	1.035490799	0.972705637	0.967214257	0.971010623	1.007221222	1.021059964	0.988531868	1.050568139	1.028324178	0.935615923	1.027135225	1.057581458	1.026805015	1.057632093	0.915824916	1.015564202	1.013297698	0.940899594	0.965822785	0.987845643	1.014919504	1.077016423	1.06520508	1.064739908	0.912749778	1.078755764	1.043054266	1.059174738	1.21359073	0.928065986	0.975947847	0.960237012	0.998663769	0.898837884	1.025593524	1.072608391	1.086712851	0.981256324	1.04541138	1.064762201	0.9396902	1.132292054	0.896294659	0.964097972	0.919051745	0.972843979	0.915444593	1.039836182	0.991922953
P40946_Arf51F	1.044667688	0.909438674	0.867790453	0.955445826	1.080992111	1.172870197	0.886822899	0.965104339	1.013642865	1.058110537	0.967726556	0.882348627	0.96804304	0.992966047	1.010303791	1.15202844	0.929736512	1.140896435	0.940276852	1.010509392	1.021097212	0.923237113	0.950515464	0.863134021	0.976185567	0.944226804	1.07080754	1.114418863	1.265389163	0.91048202	1.003368344	1.019750743	0.907125578	1.048932847	1.039755457	1.089099939	1.005517131	1.04274916	1.006721494	0.964282027	0.945792184	0.996001545	0.931083445	0.985766863	1.059473227	1.144832062	0.977187848	1.11436688	1.151344437
P61209_Arf79F	1.115403446	0.936693147	1.028352575	1.020585309	1.168829856	0.990106922	1.079009771	0.982764798	1.075016003	0.949534396	0.992535841	1.27258673	1.28162421	1.0187105	0.89501677	0.967079915	1.005096879	0.93281173	0.891596494	1.159802001	1.09234403	1.254254776	1.141347462	0.890487938	1.122457577	0.993520102	0.982320702	0.981441621	1.217643122	0.943159989	0.875106149	1.117558214	0.932826116	0.972938673	1.20500497	1.096295754	1.031091739	0.946120847	1.130412333	1.185595222	0.933574001	1.311613876	0.903961585	0.970462031	1.070019997	0.990075295	0.944185084	0.981806555	0.992773694
Q9VTX5_ArfGAP1	0.967232161	0.941364062	1.055731408	1.044990575	0.973100497	0.963284371	1.082314359	1.027102366	0.90869056	1.093394238	0.907613024	1.097071914	1.075555031	0.916488259	0.969100319	1.011833921	1.048431416	0.933866232	0.947460324	0.952077917	0.962541875	1.092389931	1.118592672	0.994265721	0.986976383	0.993449315	1.027317779	1.038675819	1.112195272	1.028056513	0.964270084	0.988270924	1.025488857	1.070269419	1.139656437	0.960923055	1.013087626	0.954467043	1.041432098	1.078525757	1.000382196	1.081602256	0.878594857	0.954207666	1.020313148	1.07655076	0.963168974	1.044867166	0.984648977
Q9VNS2_ArfGAP3	1.095900419	0.983346914	1.038288984	1.086028454	1.086946341	0.968913616	1.127860973	0.986479859	1.051056108	1.049306827	0.981804211	1.158563301	1.188854822	1.057420257	1.010542736	1.022026787	1.160211931	0.961948769	1.059166248	1.084178805	1.101577097	1.129166769	1.125144958	1.123602852	1.058982457	1.054060056	1.01652734	0.976743867	1.109853364	1.06601343	0.988078361	1.043330326	1.007952056	1.011341668	1.143367032	1.027106807	1.076159515	0.984401528	1.053364717	1.121382544	1.003472758	1.105638254	0.981780097	0.996517148	1.063735681	0.970532014	1.04262533	0.889662486	0.944008625
Q9VGQ8_Arfip	0.967213115	0.936516393	1.14807377	1.005860656	0.992377049	0.939262295	1.209785461	0.947615373	0.950856614	0.915079488	0.921129804	1.243278284	1.235789474	0.901595925	0.866179966	0.97466893	1.048387097	0.919713081	0.864216951	1.032404203	0.941546593	1.331476456	1.316811884	0.870970814	0.993524735	1.049135838	1.013415737	0.995854688	1.133328309	1.050497437	0.863627815	0.895129061	1.033076308	0.922210729	1.127391742	0.924558869	0.920946626	0.927142169	0.98756513	1.000634879	0.901462411	1.206617628	0.890144334	0.924698567	0.926594643	0.9472251	0.878318781	0.993695427	0.945859405
Q9W389_Arfrp1	0.890105263	0.794315789	0.819368421	0.931578947	0.941894737	1.011789474	0.923321374	1.132752435	0.977652486	1.05084572	0.982573039	1.01804203	0.967367367	1.001201201	0.997797798	1.11971972	1.104704705	0.927196493	0.941871546	0.831522775	1.112064037	0.887848478	0.956373697	0.847414343	0.874015748	1.044051926	1.01639131	1.01613113	1.08755041	0.90139196	0.953640324	0.904791537	0.99751089	0.938550093	0.977096115	1.060531697	1.151738241	0.972188139	1.079141104	1.007361963	1.032106339	1.046786632	1.022964867	1.002399314	1.229382127	1.165738531	1.028109255	1.108459295	1.680730946
O76895_arg	0.855971062	0.747656409	1.732066436	0.921082128	0.93713063	1.251324638	1.5095884	1.205565949	0.936038354	0.770346118	1.073666978	1.423058934	1.202921069	1.013673089	0.83691734	1.068862648	0.971037912	0.578285397	0.697863683	0.881901415	0.744659207	1.640638506	1.443669682	0.82711923	1.021033827	0.926064657	0.77003652	0.825694307	0.873764969	0.895677038	0.846095742	1.047807887	0.923268184	0.928524219	1.637370854	1.157966286	1.122960848	0.789083741	0.94834149	1.05716422	0.651373029	1.790952442	0.712935516	0.705030717	0.767249929	0.779222159	0.626700198	1.057310853	0.750827776
P48610_Argk	0.97086835	0.91002698	0.781484235	0.916121534	0.963487491	1.054135985	0.800251937	1.150564629	0.939691646	1.032827203	0.987568022	0.852176073	0.933927016	1.075924563	1.022265083	1.083777772	0.868637542	1.041449624	0.964540827	0.94994309	0.941849058	0.86961857	0.827357852	0.975268458	0.953997141	0.855405594	0.947471021	1.077750674	0.918146875	0.862942759	0.972789246	0.954104724	0.938910264	1.004534164	0.817889396	0.934325433	1.015609935	1.006544442	0.916592345	0.91936895	1.00303464	0.860821063	0.969077381	0.911920624	0.996667778	1.012643415	0.887579758	1.064733194	1.020222226
Q9VLG9_Argl	1.440838173	1.677293015	1.563056967	1.523360146	1.273215797	0.56914866	1.243291991	0.577600922	1.872849997	0.681247327	0.927276446	1.119366295	1.05036155	1.496834987	1.00028794	0.797564589	1.512968889	0.952700266	1.580942436	1.412572055	1.955355345	1.511947407	1.213843976	1.440824655	1.685223502	1.39442206	1.105226459	0.770927066	1.658525279	1.475180454	1.333124689	1.772519192	1.486985678	0.742017668	1.354618527	1.60424333	1.677217191	1.235608248	1.699747414	1.378443908	1.312863496	1.217301168	1.524757873	1.653493952	0.890475517	0.626200481	1.501316607	0.426906773	0.907861231
Q9VXN4_ArgRS	1.028014742	1.092022804	1.249406438	1.072007344	1.03060985	1.037332284	1.170207061	0.97911906	1.065522548	0.981450823	1.052989321	1.19178753	1.15901271	0.972627951	0.991524328	1.024405257	1.177964485	1.019203189	1.020656	1.068682598	1.024595355	1.263074191	1.285008477	1.052199887	1.041624284	1.009824816	1.051545239	1.049390535	1.098799699	1.021118583	1.019934375	1.014801963	1.061487311	1.009154132	1.253163153	1.090058059	1.033567719	1.075836419	1.00711082	1.120471871	0.997907961	1.166006034	1.012314276	1.031521012	0.894475011	1.040845269	1.048196081	1.003148227	1.002556266
Q8SXK2_ArgRS-m	1.038351415	0.952113268	0.924216554	1.019779873	1.048517166	1.212298721	0.899984124	1.012224163	1.108668043	1.126766153	1.081163677	0.974321321	1.032420067	1.076461927	1.039466765	1.157498948	1.054348969	1.134804061	0.9657744	1.088045143	1.037599955	1.003927603	0.979835608	1.016358262	1.071182735	0.94477062	1.128722706	1.22789946	1.276082089	0.974949073	0.992281486	1.092302779	0.960662195	1.002288939	0.977045444	1.079422299	1.056235174	1.038908786	1.030815387	1.034396949	0.97325457	0.96249286	0.96874405	0.975185632	1.075208447	1.172350945	1.070725269	1.179285206	1.129432807
Q94981_ari-1	1.134581526	1.067290763	1.196933912	1.115987461	1.092884442	0.908661485	1.156273108	0.932511708	1.020310574	0.9900912	1.05822036	1.269755977	1.120970386	1.136050705	0.936181838	1.036717299	1.102939569	0.809092329	0.848461178	1.005467896	1.064208717	1.337676843	1.175850087	1.189190866	1.123852072	1.054914371	0.923492813	0.885904312	1.16979189	1.043638704	1.022881687	1.124560718	1.072237407	1.090433424	1.736204273	1.055352009	1.055774759	0.996082521	1.132968829	1.194915732	1.020122879	1.291064681	0.985552345	1.058179595	1.179470357	0.939878325	1.076404628	0.915662651	0.893958076
P25160_Arl1	1.029246939	1.080513991	1.174953299	1.068532181	1.153329434	0.978545955	1.231817144	0.855247469	1.027372587	0.977954793	0.899109566	1.118343946	1.240781681	0.890990475	0.982586861	0.986790032	1.016512459	1.024242271	1.030132208	1.127455194	1.130893096	1.155073482	1.243105568	1.0549798	1.048158557	1.058932022	1.100384808	1.090011712	1.24738163	1.049523172	0.966076986	1.08780734	1.067930135	0.968656256	1.271790166	1.061144784	0.927223835	0.985508793	1.075251835	1.176989073	0.99741762	1.204771777	0.943989931	0.962740162	0.926381641	0.924958491	0.999762808	0.880010674	0.97404788
Q06849_Arl2	0.872998824	1.086235998	1.126694287	1.034422792	0.909774436	1.151756943	0.928349738	1.034140286	0.866985901	1.042564512	0.902633679	0.808725725	1.065929	0.960657753	0.996311664	1.157061626	1.153065929	0.944646098	0.998790079	0.961282517	0.97323049	0.976672535	1.117957746	1.025088028	0.915052817	1.071302817	1.067761912	1.088438508	0.907518297	0.992476585	0.997406807	0.862965964	0.986871961	0.887601297	1.068273886	0.824128051	0.872641043	0.97831242	0.840628396	0.799229325	0.917399466	0.910490857	1.112848893	1.084155438	0.862183703	1.151667569	1.0624468	1.120792386	1.084524549
Q9VSG8_Arl5	1.020536398	0.869885057	0.927049808	0.980536398	1.114329502	0.952490421	1.165025366	0.947080473	0.919924401	0.96866607	0.906595046	1.033024968	1.265489516	1.079615324	1.035945136	1.17121236	1.185874192	1.006508876	1.10887574	1.158579882	1.134319527	1.259489975	1.197391474	1.125170333	1.081565116	1.142690286	1.076855124	1.117491166	1.333480565	1.19655477	0.979967438	1.069087563	0.998230339	1.004955051	1.135680071	1.092347109	0.994430211	0.953659352	1.134566113	1.176116743	0.983847611	1.041466162	0.938875806	0.962424491	1.25	1.947717024	1.26832018	1.909949267	1.125041459
Q9VES1_Arl6IP1	0.895715598	0.865287715	0.788174049	0.89861084	0.956153782	1.023050583	0.782603034	0.761149814	0.640992252	0.872387525	0.548961521	0.506510841	0.881745982	0.793758989	0.987242824	0.993996623	1.078419111	0.810902205	1.117611254	0.852055999	0.773028541	0.586548933	0.918145695	1.104841795	0.720206034	1.083414275	1.114673441	1.103289706	1.264752227	0.917291057	0.977805458	0.843166119	0.939040501	1.023326917	1.173828417	0.992963018	0.748345561	0.939691571	0.973618805	1.005180416	0.913909268	0.827417713	1.078350865	1.002103834	0.7746343	0.892622999	0.828559053	1.042998051	0.88803681
Q9VHV5_Arl8	0.906488683	0.980321398	0.967871908	0.921052017	0.978663023	1.057669399	0.974063804	1.007107178	1.128159441	0.990220122	1.074375119	1.078759547	1.228106969	1.199989965	1.002037028	1.135356982	0.944669108	0.969838373	0.869549857	1.121161716	1.074704861	1.144590979	1.05311332	0.921200731	1.127166157	0.996803857	1.02399941	1.05854639	1.157116383	0.943279151	0.928254088	1.136893846	0.946403252	1.061083278	1.039196333	1.019632369	0.996599271	0.996667676	1.001866492	0.985341685	0.926796376	1.210300196	0.8128263	0.858481075	1.034609159	1.04965248	0.926338506	1.133533276	1.015003705
P18824_arm	1.081920327	1.054262234	1.098737116	0.977932027	1.07938063	1.011988114	1.094396641	0.906806801	1.019067867	0.906699828	0.971404885	1.107079581	1.129736548	0.968783654	0.991798293	1.023009653	1.072678593	1.050721646	0.965848948	1.16327343	1.116414324	1.151034071	1.131711521	0.8552035	1.074930399	1.01991913	0.979915116	1.082388231	1.14257906	0.962172512	1.010322316	1.028692821	1.063703276	0.964601279	1.119553299	1.006205715	0.978236232	1.014613606	1.023265671	0.982640585	0.96653429	1.067341089	1.063784613	1.061078599	0.951905781	1.016693811	1.097422091	1.011674121	0.963346966
P45889_Arp1	1.085644243	0.963313018	1.049119555	1.027115908	1.113358076	1.007525316	1.100643625	0.889150943	1.027336449	0.942408746	0.960051137	1.164371363	1.187179216	0.982473884	0.952988195	0.967404595	1.069821418	0.943016517	0.929551414	1.127240009	1.065392388	1.177593191	1.132286872	0.915471105	1.050035926	0.981804041	0.970328328	0.991502109	1.154412518	0.990150171	0.922984612	1.030671301	1.015379799	0.996444023	1.117974835	1.106374799	1.014794318	0.973434778	1.072030339	1.144222052	0.948298203	1.174913042	0.928398706	0.947285584	0.937222504	0.965977361	0.935408008	0.926832235	0.939153332
Q9VWE8_Arp10	1.080683133	0.962491521	1.053429632	1.016000958	1.094190176	1.043793145	1.107983203	0.892794454	1.101873042	0.946563868	0.993223276	1.186082165	1.275315548	1.002079748	0.952309237	1.001111589	1.044104991	0.971414556	0.957322512	1.205806279	1.072244024	1.237541637	1.132421135	0.944092483	1.065900333	0.978218274	1.014314572	1.013391613	1.171879354	0.963882697	0.935021271	1.138259915	1.045148895	1.025593523	1.129878949	1.100354296	1.018482433	0.9425155	1.110865072	1.144582226	0.933215235	1.137769104	0.970279116	0.977963449	0.951220071	0.999175163	0.95034941	0.983846947	0.991475372
P45888_Arp2	1.020653702	0.978502589	1.017100525	0.957608807	1.050677367	0.955269747	1.006522793	0.985693501	1.059396217	0.95163676	0.994556256	1.057335112	1.169236759	0.993625325	0.907214068	1.009462408	1.038918116	0.936112535	0.940994794	1.086531977	1.023157015	1.171008053	1.08955554	0.93308468	1.07615438	0.965386201	0.97690984	0.94443155	1.031429829	0.928880708	0.963749824	1.011429565	1.025110282	0.984655747	1.043360484	1.099648278	0.9744971	0.909971615	1.021121807	1.107632975	0.919320005	1.110420749	0.999638764	1.002555743	0.95021281	0.979394798	0.923098585	0.977214395	0.858062858
P32392_Arp3	1.00509524	1.081063423	1.133993405	0.996299155	1.040862771	0.920102957	1.133326895	0.919547151	1.00861163	0.904141649	0.965394425	1.130708187	1.157534895	0.972990886	0.932831024	0.96153942	1.092364194	0.865701546	0.980605301	0.999890714	0.913809434	1.10054057	1.134520785	0.971149792	0.969890264	1.087296611	0.965297316	0.95061824	1.077807233	0.985715668	0.954198892	0.94569689	1.071169985	0.944923482	1.048771578	0.92743523	0.890032593	0.986110491	0.918875039	0.987474277	0.996651419	1.071181161	1.060694373	1.053742995	0.926465912	0.959460848	0.961246606	0.970747817	0.960887847
A0A0B4KG83_Arp5	1.328544949	1.010812481	1.106889095	1.084182885	1.223972814	1.141952425	1.034828696	0.951921257	1.088775317	1.118303994	1.019117925	1.044103729	1	1	1	1	1	1.045962733	0.904347826	1.58757764	1.332919255	1.260094744	1.20730882	0.935935033	1.025490638	1.039476652	1.162774339	1.160523354	1.478756331	0.893781654	1.053448276	1.395689655	1.112068966	1.160344828	1.127422481	1.112241602	1.096414729	0.896156331	1.181040052	1.144864341	0.894864341	1.356741573	0.990168539	1.311797753	0.962904499	0.756906077	0.80347277	0.7308603	1
Q9VX09_Arp8	1.132917624	0.884804726	0.991795208	0.967509025	1.015425008	1.091237283	0.994397759	0.931372549	1.257703081	1.074229692	1.056022409	1.201680672	1.043348281	0.970104634	1.035874439	0.721973094	1.436472347	1	1	1	1	1.295399516	1.025020178	1.349475383	1.418886199	1.408393866	1.031940299	0.949552239	1.125671642	0.899104478	0.962909091	0.906181818	1.146181818	1.063272727	1.271118452	1.159037282	1.067956583	0.882727702	1.235960359	1.07881076	0.874469089	1.12585034	0.897581255	0.84542706	1	1	1	1	1.006837607
O97182_Arpc1	1.064259493	0.995060559	1.037411149	0.983287738	1.097853535	0.952183876	1.074978433	1.004279649	0.973687772	0.9347565	0.927998714	1.132009405	1.10907073	0.899628634	0.914064968	0.939582533	1.014444871	0.976456092	0.885818709	1.127951314	1.043349762	1.105884755	1.098476743	0.847902969	1.062090089	1.022444562	0.918267107	0.932071827	1.075189785	0.990789001	0.874045212	1.042069698	0.977484719	0.97144492	1.012103575	0.920020192	0.893330562	0.965369996	0.936987766	0.998034208	0.970952607	1.112711166	0.984022139	0.995845334	1.031248811	0.998568873	0.945320291	1.019898755	0.921097811
X2JAI2_Arpc2	1.045598554	1.009701439	1.099609795	1.014131524	1.076931338	0.969991766	1.199764423	0.911620971	1.056338028	0.952145256	0.974738108	1.197997594	1.21708672	0.972243781	0.898870553	1.006964585	1.055297986	0.921946669	0.910120112	1.171062349	1.067227707	1.197148125	1.189541273	0.960622261	1.113759972	1.056407453	0.99158223	0.98475362	1.143000526	1.015963294	0.951027636	1.040139522	1.032476523	0.988784545	1.14823244	0.975815593	0.906131558	0.975355106	1.010405228	1.029276327	0.982094152	1.167221245	0.947076063	0.968348438	1.006087683	1.021503151	0.933627845	0.955045354	0.94181659
Q9VF28_Arpc3A	1.116764729	0.966826663	1.070353023	1.046992336	1.229406983	1.012483549	1.180639674	0.955917936	1.038582804	0.950506665	1.020589227	1.199043862	1.123387511	0.926468287	0.919157594	0.968678039	1.025486821	0.881084644	0.8500612	1.094153093	0.984370587	1.156027597	1.204695901	1.001538366	1.022267458	1.057323554	1.005386693	0.982034409	1.144306668	0.972275691	0.994222325	0.938525537	1.053663046	0.980702565	1.0901342	0.951915781	0.938400986	0.92264558	0.98861912	1.056370922	0.909427162	1.203432687	0.876075907	0.886215616	0.826949096	0.936889263	0.894840494	0.980832256	0.907202836
Q9VMH2_Arpc4	0.971046054	1.156096991	1.18014002	1.059924875	1.047311419	0.918472939	1.143533658	0.862175316	0.96433532	0.882222344	0.903756767	1.10374583	1.085338441	0.90986513	0.951798265	0.931251187	1.141645033	0.91236608	0.863736369	1.059056342	0.967093935	0.99557895	1.242646551	1.067296666	0.780757381	1.147745955	0.923262663	0.95183566	1.106023744	1.051383833	0.93401953	0.989531099	1.037363797	0.986954719	1.110626935	0.975171058	0.888501548	0.994047729	0.969144616	1.068349126	1.039477832	1.074106475	1.076730962	1.082304469	1.003320222	0.950960204	0.963396576	1.009821842	0.862211201
Q9VQD8_Arpc5	0.969128286	1.036974429	1.095594871	0.977537426	0.986362008	0.879793711	1.039287991	0.892424656	0.983360648	0.900915051	0.918920149	1.100996995	1.095302927	0.926404962	0.947091748	0.958702065	1.131570986	1.036283041	0.908389427	1.2208176	1.070924315	1.209899391	1.177680945	0.914280427	1.048605269	1.001665601	0.897136771	0.914164351	1.004064095	1.004259955	0.897103838	1.01842477	0.929950553	0.94937603	1.062518446	0.938612887	0.895113953	0.941269061	0.967896376	1.032743073	0.970929661	1.132567214	0.965954248	0.995847206	0.968877771	0.902114267	0.993732516	0.942382182	0.888761248
P15372_Arr1	1.001978563	1.158678106	1.125536501	1.092062017	0.775672361	0.911657815	1.12394626	0.86382015	1.201731847	1.27585676	1.063401198	0.987309712	0.985756938	1.237732634	1.339477595	1.001658963	1.117996077	1.194208152	1.144850992	1.005754597	1.163650589	0.931691385	1.090645077	1.06016933	1.108157794	0.998427312	1.301920793	1.00133994	0.994909154	1.315015423	1.132042037	1.067953343	1.272862074	1.096266354	1.130835922	1.056504978	1.167196579	1.201636064	1.065492475	0.878531898	1.288270871	0.908347329	1.204283532	1.239441187	1.258136012	1.020054559	1.346031644	0.918979428	1.1041978
P19107_Arr2	1.038073348	1.015909215	1.070900143	1.132474812	0.798832566	1.012674083	1.105392197	1.043846899	1.095610743	1.280669407	1.021526594	1.027418776	1.0135135	1.107049704	1.226209477	1.134924486	1.002160637	1.266706282	1.037746828	0.954412449	1.012451818	1.012404103	1.048443906	0.964354052	1.085818752	0.991613265	1.242585374	1.139875915	1.047076786	1.169870792	1.004344246	1.010133002	1.120630389	1.133198897	1.085588881	1.041291839	0.997751592	1.074761551	1.051816261	0.811625533	1.054386052	0.974785844	1.150992335	1.143279125	1.156176038	1.166354788	1.040782109	1.069083009	1.257846068
Q9V9K7_Ars2	1.068986579	1.011502546	1.192177777	1.094541415	1.125835226	0.892709862	1.201633276	0.838683156	0.950171038	0.9112391	0.885270274	1.228109038	1.241194614	0.888836823	0.924503233	0.881066493	1.095320007	0.8904104	0.901380441	1.134579832	1.039780249	1.300715559	1.302967202	0.974667615	1.104122932	1.094207806	0.894577214	0.894766772	1.124322503	1.068613272	0.873565275	0.982419405	1.039522037	0.96989763	1.239987883	0.948843345	0.903326478	0.849666794	1.053918755	1.133912059	0.903892449	1.271327094	0.943105325	0.9517996	0.994534732	0.87347248	0.907578755	0.870661592	0.864086344
Q9VGW7_Art1	0.973616207	0.981241027	1.188483012	1.043244537	1.025697878	0.951619078	1.253546938	0.853846457	0.993556396	0.921987073	0.930972649	1.143434224	1.242989096	0.861615926	0.914568675	0.938110641	1.293207509	0.805028477	0.875379939	0.952164547	0.888541329	1.235473834	1.336500975	1.162561853	1.06931324	1.083633228	0.949205456	0.932363266	1.116649248	1.017565721	1.003295617	0.969153026	1.065428979	1.016016698	1.31600198	1.064627888	0.96949647	0.918192711	1.032027404	1.395868608	0.910299825	1.149052575	0.980547401	0.955238265	0.941499266	0.97627243	0.937873829	0.951811308	0.951568907
Q9VFB3_Art3	1.039713155	1.135113749	1.253461919	1.11330366	0.960385757	1.033926805	1.000986193	0.601249178	0.665023011	0.760683761	0.885930309	0.79651545	1.196807119	1.129416383	1.00902905	1.183721539	1.230437058	0.827032136	0.84168242	1.148865784	0.913043478	0.922992541	1.277972795	1.306274682	0.824703817	1.274901272	1.109266202	1.16550616	1.205141939	1.022495983	0.882457703	1.352626892	1.063223508	1.18254675	1.287522865	1.023827862	1.029171079	0.930634447	1.101569269	1.237556561	1.016607298	0.770436331	1.382902939	1.275155833	0.73499771	0.876087952	1.150251947	1.001374256	1.034397528
F0JAI1_Art4	1.099303849	1.000900901	1.548280098	1.130753481	1.186895987	0.744389844	1.565222395	0.814603832	0.976178146	0.87922205	0.911502388	1.661200299	1.61979628	0.821744907	0.855580159	0.846501329	1.385252436	0.786654135	0.824365602	1.208294173	0.917410714	1.74563608	1.782856755	0.975276778	1.173538002	1.125178292	0.894610473	0.848122605	1.098697318	1.203014049	0.695929969	0.855712633	1.123408965	0.783770187	1.83456092	0.957351264	0.776206995	0.708396693	1.152109865	1.66265919	0.779913515	1.652027359	0.861144746	0.928363386	0.929040629	0.707323007	0.791338902	0.660368178	0.749135216
Q9W1V1_Art7	1.035545745	0.827218755	0.9117065	0.897701324	1.055640128	1.132135789	1.074146906	1.074667438	1.226200116	1.14048583	1.198149219	1.108849046	1.068940257	1.125752889	1.007732378	1.114276412	1.036871236	1.005284628	0.941961802	1.001761543	1.167531986	1.337155963	1.032492355	0.869266055	1.055045872	0.906345566	1.123508712	1.150630847	1.287271479	0.962835808	1.09868749	0.994185081	1.145705267	0.986874896	1.0216095	1.139034708	1.169512257	1.013302074	1.11217573	1.159268131	0.978084705	1.042380952	1.031292517	1.08292517	1.016129032	0.893017558	0.925479788	0.866680278	1.030416035
Q8SX32_Art8	0.995702368	1.141231988	1.147214966	1.084604365	0.991994607	1.062189264	1.042861455	1.106348727	0.979273569	1.029077372	1.003119026	0.838615555	0.763315902	0.901413907	1.116405191	1.076118536	1.269998063	0.890041494	1.064315353	0.844139004	0.843620332	0.6138589	1.097916144	1.063394426	0.958448406	1.235249812	1.094415788	1.111160948	1.225536368	0.953203259	1.033237587	0.976884147	1.045684585	1.256326084	1.164907852	0.902398384	0.922797273	1.066144913	0.952032315	0.985761171	1.155920222	0.79288945	1.108025665	1.126012412	1.024498886	1.054059526	1.10427212	1.050347574	1.06097561
Q9VPU7_aru	1.047398539	0.91328778	1.055408102	1.000649424	1.044480837	0.958135683	1.104877209	1.008579819	1.032892039	0.861443312	1.021392129	1.200387158	1.201375928	0.944148831	0.918506532	0.951941786	0.972729619	0.91706918	0.878380717	1.026668135	1.009046713	1.239498598	1.165533022	0.882394357	1.021776029	0.920892163	0.962318448	1.011905971	1.159788288	0.921059462	0.82902767	0.993754849	0.930837859	0.969627618	1.112073204	1.09787854	0.959045798	0.90217609	1.000455249	1.076117636	0.905499408	1.138095172	0.885080281	0.880139885	0.977803949	0.968499008	0.880839461	1.013867227	0.896218991
A1Z7A6_Asap	1.032041999	1.002715424	1.03063903	0.957843049	1.014142831	1.005181933	1.018377886	0.942777947	1.069182868	1.014466889	0.985609052	1.087902491	1.13091884	1.080568936	0.94615105	1.029173862	1.027583386	1.031238932	0.936105405	1.198909117	0.993553871	1.106812791	1.044328126	0.912570541	1.114418909	0.973828413	1.062796384	1.051348548	1.126129964	0.942019858	0.939306358	1.021508267	1.005074607	0.98517946	1.114979757	1.059440559	1.045896209	1.006919396	1.042878174	1.094810453	0.965918292	1.032826788	0.940464443	0.903230051	0.964607223	0.943762726	0.875817169	0.963696281	1.044237827
L0MPN7_Asator	1.181805786	0.951654811	1.045496898	0.992947451	1.115355771	0.996121477	1.058733644	0.959769894	1.091567472	0.980636131	1.026567536	1.177112626	1.213743254	0.996322545	1.020838911	1.058613839	1.011300072	0.97254131	0.837390651	1.137735266	1.020146682	1.184713606	1.133505515	0.933150692	1.127048686	1.013094692	1.040555124	1.035310453	1.225644586	1.009994432	0.946958117	1.11485402	0.998586059	1.012744574	1.103229482	1.082498122	1.016587678	0.96316655	1.101565535	1.090604201	0.936355632	1.16373933	0.919798686	0.934118694	1.08858796	1.013135541	0.954967377	0.986015019	0.991881083
Q94545_ash2	1.010749928	0.940217566	1.017937939	1.032763213	0.990116484	0.918493085	1.001076694	0.899867484	0.985091933	0.886367401	0.983021368	1.077521948	0.995	0.986486486	0.918783784	1.024864865	1.235135135	0.965041933	0.874532924	1.085360791	1.128788508	1.09598429	1.023525168	1.231925297	1.08075505	1.018154857	1.026369493	1.036213037	1.213596895	1.068504662	1.243570795	1.170854271	1.150162578	1.301803133	1.044113801	0.924849612	0.878905001	0.872918543	0.96451716	1.044230043	0.9228735	0.962837838	0.90503003	0.916103604	1.004715518	0.997518149	0.968976857	1.054538686	0.89260498
Q9VDS9_Ask1	1.058941787	0.951022668	0.98196492	1.009061244	1.047549677	1.050026222	1.129519219	1.035392617	0.98528479	0.949384752	1.106050996	0.998224026	1.32147855	1.111711625	0.9969599	1.130096994	1.032186459	1.06581515	1.029270889	1.114333866	1.170791201	1.146727536	1.025215462	1.022954177	1.01689564	0.976235174	1.068859318	1.03800337	1.227671567	0.952931606	0.911067194	1.07249844	1.041085916	1.115352611	0.993323987	1.051516568	0.987337829	0.968066404	1.038631862	1.075194161	0.951532145	0.94986817	0.913944632	0.981763586	1.025324351	1.007110778	0.931137725	1.035637059	1.087874993
A0A0B4LGL2_aSMase	1.013863115	0.830913656	1.007531929	0.897391115	1.001637376	0.960484663	0.95220393	1.040892193	1.089219331	0.984067977	1.203133298	1.339883165	1.123113582	1.212867355	1.181096108	1.179507546	0.930897538	1	1	1	1	1.221153846	1.211538462	1.098717949	1.214102564	0.921153846	1.017454236	0.964921243	1.0951043	0.87654321	1.037725533	0.966921815	1.044833242	1.091853472	0.948582412	0.992888035	1.069774147	0.742335416	0.958769822	1.077847189	0.698318116	1.270071716	0.870386566	0.887003673	0.936807095	1.050997783	0.94345898	1.492239468	0.952402135
Q9V434_AsnRS	0.987269082	1.141699986	1.07736304	0.987380252	1.092834881	1.044379957	1.047060888	0.933125005	1.039342048	0.872133574	0.968743084	1.081583908	1.173357345	1.104889823	0.928831195	1.012721042	1.119046547	0.930458483	1.020174489	1.067823793	1.028189072	1.153182794	1.117207297	1.109654828	1.041741119	1.072207544	0.976389262	0.98458477	1.072608364	0.968363694	1.033312696	1.08473836	1.014801376	1.080342102	1.084539611	1.100217361	1.044233203	0.994193893	1.038338806	1.180788134	0.99141907	1.01884515	1.040961997	1.039736812	0.920144233	0.964977494	0.980722133	1.029112821	0.972306887
Q7JZR5_AsnRS-m	1.045278842	0.911025968	0.905917412	0.903175819	1.018918689	1.23562367	0.903759287	1.071515602	1.064710253	0.974130758	1.124011887	0.995037147	0.990076853	1.064500454	1.051572231	1.14267081	0.982084628	1.041168802	0.851313932	1.074860203	1.060982836	1.028910401	0.928393624	0.949268506	1.055957493	0.928990465	0.998560607	1.077610899	1.061821195	0.883278326	0.977236134	1.082508307	0.885546915	1.032852592	0.898190686	1.01564429	1.057082431	1.033130275	1.060745583	0.957256481	0.949029568	0.956126021	0.932636599	0.955720156	1.011843304	1.106665654	0.94383107	1.164645785	1.061053012
Q7KTW9_AsnS	1.074599529	1.038743854	0.944899196	1.224996126	1.147268911	0.988390933	1.024390244	0.789700158	1.145383066	1.441195454	1.037788253	1.0135936	1.043494953	1.110340778	0.936699713	0.973352002	1.100788148	1.019843979	1.037347635	1.153144807	1.113798147	1.069533124	1.020594206	1.150138402	1.116109983	0.99686289	1.014163124	1.052302253	1.275356561	1.191708712	1.164936212	1.068325062	1.126693664	1.268580824	1.067100821	1.008589864	1.300265686	1.111728161	1.07946623	1.131444895	1.207934637	0.952740705	1.106008576	1.044586342	1.170917684	1.046724646	1.120611952	0.965577724	1.026221692
A0A0B4KFS5_Asph	1.064538261	0.939290655	1.161788303	1.194212361	1.122591711	0.894516682	1.294434532	0.81687482	0.94312518	0.891982734	0.967171223	1.25745036	1.441250931	0.841293479	0.857461972	0.899606425	0.966301457	0.904494194	0.871632701	1.220091691	1.133503999	1.230256333	1.362630702	1.030121114	0.991070908	1.050077518	0.938697267	0.964538118	1.116402605	1.019426829	0.86194185	1.062932436	1.050871489	1.124390336	1.290922087	0.973606484	0.888073691	0.865631786	1.051020271	1.251999407	0.992919471	1.382189054	0.963045588	0.998859555	0.973495956	0.972696915	1.012633896	0.839679177	0.888891682
Q9W2J2_ASPP	1.224815725	0.713759214	0.842342342	0.911138411	1.361588862	1.004504505	1	1	1	1	1	1	2.034774609	1.737626495	0.730634775	1.036614535	0.796320147	0.979329427	0.512858073	1.729817708	1.60172526	1.77300114	1.137925419	0.832112034	1.63654128	0.655919231	1.176941316	0.995406046	1.611736811	0.989626556	0.634632418	1.444198406	0.581488043	1.403011515	1	1	1	1	1	1	1	1	1	1	1.415823496	0.952220349	0.65851602	0.42945475	1.198175367
Q9W5X1_aspr	0.641048138	1.157143556	0.818124744	0.840579337	0.622046515	0.833035294	0.675068361	1.041351854	0.732555687	0.758947202	0.808227433	0.590650918	0.767675131	1.004319037	1.100468441	1.041036017	0.952969725	0.865063704	1.096321808	0.79159701	0.821698622	0.5819875	0.702559	1.153033177	0.69961444	1.122639221	0.835074733	1.115807996	0.659010102	0.905441281	1.097445662	0.891923649	1.028306706	0.914494706	0.619194369	0.595703693	0.661397007	1.110860302	0.593024838	0.597296598	1.239845566	0.49883392	1.396736689	1.08982879	0.745301108	0.844662285	1.218413434	1.019899579	0.797760442
Q7K0E6_AspRS	1.028540821	1.024836736	1.175373396	1.06696195	1.044856925	1.225388847	1.215714941	1.119848132	0.950503378	0.953436378	0.974817587	1.161472438	1.177230279	0.934869787	0.88909589	1.041274264	1.075475422	0.905911556	0.92261973	1.020054724	0.965838153	1.159947916	1.176579447	0.986597476	0.922313056	0.965267907	1.004815535	1.065626918	1.081853913	1.034905843	0.942116138	1.002608794	1.04812802	0.99719826	1.223331073	1.022636021	1.046918218	1.006981745	0.957806171	1.093675833	0.955691572	1.161871772	0.971983457	0.96609903	0.903791621	1.018877021	0.954974777	1.231533873	0.969002018
Q9VJH2_AspRS-m	1.050991374	1.059572157	1.188946637	1.045310717	1.126035848	1.012955885	1.139284676	0.939876503	1.005020269	0.897858475	0.983185947	1.211338795	1.210760448	1.004591044	0.942011808	0.993023413	1.096156876	0.97461763	0.950531232	1.135516637	1.044401635	1.232150276	1.19362589	0.960471654	1.058271249	1.037838923	0.975741591	0.969986665	1.1617247	1.001677286	0.914157392	0.964561261	1.028344095	0.896494056	1.16297647	0.976519183	0.975929992	0.969554323	1.067310436	1.096354457	0.96152892	1.140888607	1.01419109	1.019792517	1.017131871	0.964404161	0.98347238	1.002300271	0.926784616
A0A0B4KF31_asrij	0.93304987	1.024052321	0.954651917	0.975749496	0.935914529	1.236361343	0.912390684	1.057469213	0.927315724	0.898603427	0.951566125	0.820787971	0.959793982	0.972600515	1.085075285	1.11922604	1.027353084	1.035685833	0.989409063	0.95372323	0.896668073	1.015644637	0.94184182	1.055102925	1.00836403	1.066002167	1.017603226	1.111072149	1.136828263	0.933339178	0.995604787	0.9080569	0.881032281	0.966590443	0.962444177	0.957749699	0.935344236	1.091709979	0.914325778	0.954198357	1.077321709	0.859212175	1.012676813	1.028003581	0.9560666	1.062071509	1.04841069	1.16301403	0.943901249
O97069_Ass	1.068685217	1.485439289	1.077847359	1.274586624	1.058906096	0.97590696	0.928004335	0.768947297	1.262782821	1.131283024	1.122801788	0.740089419	0.742456914	1.233239839	1.200376141	1.051476191	1.470889606	1.069296293	1.281156473	1.046792265	1.298058476	0.929169894	1.011652468	1.559160037	1.295817785	1.434415264	1.226086078	1.02911553	1.471125883	1.224671285	1.268977501	1.226413024	1.190707884	1.231241997	1.00148511	1.246701898	1.285507638	1.219063416	1.224116649	1.121258293	1.294379725	0.761911525	1.768728254	1.64167791	1.210545209	0.937209206	1.41578882	0.814982535	1.17779636
Q9VC44_AstA	1.354247301	0.712466898	0.611631697	0.699633327	1.183133021	1.22397637	0.720381563	1.396453797	1.451722129	1.262724823	1.33000801	1.076130489	0.928425481	1.481129808	1.194411058	1.254927885	0.830588942	1.064089625	0.783124748	1.243540573	1.379895034	1.108025837	0.713564481	0.896428837	1.388893014	0.788328755	1.22420566	1.262793619	1.667726678	0.840036343	0.959795481	1.156448018	0.787527859	0.94882664	0.781729159	1.336490143	1.402654297	0.982154362	1.327599536	1.124468496	0.856719495	1.154510801	0.774925879	0.81956798	1.541046426	1.365659543	0.899115696	1.308474576	1.150453495
Q95NV8_AstC	1.015463198	0.747301423	0.644964983	0.739280512	0.881242643	1.203675253	0.462277464	1.408678897	1.235494464	1.26736865	1.42269594	0.642531481	0.559383469	1.57245935	1.265870596	1.427337398	0.758960027	1.223716691	0.932402272	0.928226025	1.205439267	0.690681306	0.532122184	0.965989075	1.075943691	0.775280594	1.255970674	1.422279409	0.976894879	0.7126856	1.001271091	1.001793456	0.774163779	0.973185214	0.485880028	1.188478783	1.581883088	1.092666964	1.071694184	0.812477423	0.957735705	0.663964086	0.780529809	0.813560634	1.349906791	1.365885486	0.990545939	1.35563249	1.218210858
Q9VVQ1_AstC-R1	0.256081282	1.955873628	1.851416494	1.065299614	0.238875705	0.437555621	1.343007186	0.330569375	0.323106689	0.203150912	0.15395246	0.155610835	1	1	1	1	1	0.504091529	1.677905743	0.209349902	0.206394908	0.2930213	1.356992713	1.648332399	0.169002242	1.67110426	0.532328634	0.614811214	0.27580619	1.283584508	1.610349843	0.259894358	2.18426089	0.487407181	1.07087724	0.428418015	0.400832271	1.019799987	0.41237667	0.489630177	1.397207866	0.264670314	2.181860063	1.480161244	0.191256026	0.357965628	1.837596143	0.409634564	0.430769231
Q9VEX5_Asun	1.238636364	0.953369906	1.118534483	1.098942006	1.186128527	0.997257053	0.730410448	1.132462687	1.065298507	0.845149254	1.013059701	0.791977612	1.280615586	0.947282253	0.906352325	1.027504912	1.044531762	1.286132813	0.673828125	0.875	0.813476563	1.173042362	1.226957638	0.985109114	1.000256739	1.001026958	0.934739618	0.999780268	1.143045485	0.990771259	1	1	1	1	1.030102547	1.113959643	1.032252729	0.876612636	1.122064175	1.150347337	0.787793583	1.196613358	0.889934149	0.944496707	0.955752212	0.771681416	0.924336283	0.934070796	1.117355853
O96539_Ate1	0.935093877	1.179397181	1.187364199	1.067747507	0.984010251	1.043345033	1.096061929	1.083333333	1.181733167	1.051745636	1.077202826	1.189318371	1.112474156	1.081369171	1.027337468	1.094004135	1.127636113	1.004854148	0.998974476	1.026367366	1.147538742	1.052897258	1.035758547	1.03844875	1.102137049	1.017924614	0.985816876	1.040544584	1.344673848	1.036864153	1.000781174	1.062347427	1.040767503	1.052631579	1.090970962	1.165078645	1.158272837	0.99100121	1.148933757	1.105111918	1.029756503	1.082540438	1.002412668	1.027592769	0.994516792	1.078249943	0.99754398	1.043979895	1.021637957
Q9VQY4_Atet	1.208106473	1.024727768	1.128478524	1.144131881	1.146551724	1.10722928	1.103681813	1.000369413	1.071912326	0.997783524	1.024996922	1.2407339	1.152542373	1.275208273	0.857224935	1.196782534	1.059465671	0.952987822	0.908524497	1.163126593	1.099877277	1.145470715	1.072798882	1.012577817	1.091856181	0.973827976	1.059627912	1.064088268	1.163037737	0.970303422	0.943054007	1.067281386	0.888134563	1.109230925	1.116698004	1.028325347	0.91914842	1.050888579	1.008430885	1.03845454	0.957239037	1.004612409	1.033402767	0.9764172	0.884251712	1.019834801	1.108249103	1.227746984	0.973917149
Q9W0Z5_Atf-2	1.201063476	0.858291791	0.805284148	0.89817215	1.141575274	1.144848787	0.80334024	1.134435322	1.250533597	1.061351987	1.294249614	1.062489289	0.982336564	1.146191179	1.018880555	1.312921237	0.910678696	1.096677981	0.872527962	1.14022592	1.154938512	1.053864421	0.85607369	0.903839234	1.229112694	0.889752447	1.103920034	1.116164568	1.395431085	0.888689657	0.83463029	1.177305844	0.770547202	0.975011626	0.824562132	1.213441797	1.259691209	0.93898896	1.219916438	1.115699621	0.913270247	1.030068908	0.83779793	0.887554813	1.262908274	1.174959672	0.913319822	1.156981153	1.01579619
Q8MQJ7_Atg1	1.44332211	0.996632997	1.105499439	1.180695847	1.249158249	1.058361392	0.821276596	0.797163121	1.056737589	0.822695035	1.337588652	1.314893617	0.777634547	0.941347083	0.853689977	0.920399613	1.030615533	1.074503311	1.216887417	0.826986755	1.214403974	1.371513944	1.445219124	1.22310757	1.422310757	1.14940239	1	1	1	1	1.129240711	1.47819063	1.256865913	1.384491115	1.026157407	1.004166667	1.084027778	0.939814815	1.046064815	1.090046296	0.826157407	1	1	1	0.898440249	0.97959423	0.931159845	0.87908995	0.90875
Q9VTU1_Atg12	0.862229246	1.139722971	1.088965325	0.897648043	0.806079762	0.948219764	0.798039216	0.714901961	0.73372549	0.640392157	0.759215686	0.636862745	1.076610169	1.123389831	1.143502825	1.194576271	1.220112994	0.886624726	0.966356674	0.871033917	0.883068928	1.100194081	1.144832606	1.045851528	1.019165454	1.093643862	1.104713768	1.160421932	1.154818152	1.01230634	1.228639781	0.771701982	1.467874231	0.963431306	0.999076052	0.759253912	0.691112779	1.027949414	0.751342611	0.704452272	1.019691632	0.92255296	1.016415775	0.963558341	0.837291324	1.00693628	1.02280743	0.996943334	0.80563732
Q9VAP6_Atg14	1.095255745	0.892142328	0.9051149	1.07153447	1.029651594	1.096738325	1	1	1	1	1	1	0.984126984	1.113095238	1.240079365	1.454365079	1.359126984	0.815284653	0.684096535	0.989789604	0.938428218	0.704545455	1.03219697	0.981060606	1.123106061	0.901515152	1.189090909	1.038181818	1.313636364	0.890909091	0.728285078	0.771714922	0.763919822	0.723830735	1.068303095	1.226254002	1.25506937	0.940234792	1.072572038	1.312700107	0.917822839	1.039647577	1.160792952	1.044052863	1	1	1	1	1.004636785
B7Z0R7_Atg16	1.021874853	0.960709759	1.009435291	1.008543398	1.073463831	1.028446698	0.950087324	1.068664399	1.08180899	0.977847229	1.004687931	0.978950271	1.040500174	1.005071205	1.023063564	1.038832928	0.985411601	1.153051418	1.011052379	1.279673234	1.40100913	1.069238839	0.950460427	1.045576408	1.080545518	1.042895442	1.017301038	1.039819005	1.197657706	0.868937982	0.885795763	0.871537208	0.883215644	0.914584465	0.909378508	0.985814879	1.054393305	0.881620574	1.002143076	1.052862537	0.868558016	1.081624487	0.945883765	0.947484245	1.094728171	0.94398682	1.118066996	0.915980231	1.054357729
Q7KTS2_Atg17	1.136622492	0.890574272	0.958539571	1.0101123	1.112352972	1.026238757	1.038325991	0.988986784	1.018502203	1.000881057	1.291629956	1.214977974	1.189660542	1.033011523	1.003892868	1.106197446	1.102616007	1	1	1	1	1.191965169	0.969127251	0.882643974	0.972887394	0.962002771	1.058374666	1.039425156	1.219254737	1.007757853	0.904916909	1.159157101	1.059448347	0.927188624	1.068930415	1.208027339	1.195520977	0.863375264	1.152112266	1.222715044	0.905184323	1.178707224	0.876901141	0.863117871	0.945083854	0.874054587	0.773100954	0.84445906	1.010928962
M9PEY7_Atg18a	1.077010839	0.974990242	1.040321854	1.047377428	1.134776473	1.035427988	1.087597083	0.941068358	1.035187052	1.075769254	0.982006284	1.035720638	1.10559692	0.968915438	0.947569572	1.054666931	1.016221725	1.00699654	0.948170039	1.134121391	1.085878104	1.182952394	1.128009197	1.046017041	1.15377333	1.094671355	1.073994045	1.079931944	1.267562739	1.005784772	0.998206951	1.119633884	1.010237058	1.110877134	1.07489898	1.114946123	1.066649028	0.934505484	1.108355782	1.093323071	0.958870502	1.103862861	0.92640785	0.978067794	1.068947892	1.100837711	0.992559989	1.053755502	1.173725633
Q9VZX7_Atg2	1.089043562	1.081123245	1.006960278	1.103084123	0.944917797	1.063602544	1.171939477	0.854195323	1.051581843	1.064649243	0.890646492	1.156808803	1.433467742	1.915322581	1.141129032	1.58266129	0.885080645	1	1	1	1	1.154228856	1.532338308	1.537313433	1.651741294	1.584577114	1.117378049	1.048780488	1.249237805	0.93445122	1.311228335	1.192916353	1.069329314	1.122079879	1.294887938	1.050365147	1.220599345	1.098212037	1.246537396	1.119113573	1.136237723	1.12477396	1.077757685	1.076853526	1.052120141	0.924028269	0.953180212	1.106890459	1.350912779
Q9VVS6_Atg3	1.097387018	1.056552039	1.024073379	1.038044099	1.073656379	1.068890666	1.039956629	1.118693335	1.324959051	1.176113687	1.256765174	1.146630678	1.056773468	1.114631013	1.045169839	1.163655344	1.130731551	1.106005548	1.071269488	1.159809323	1.175946548	1.127166701	1.039229546	1.050763868	1.231843082	1.118507928	1.17953606	1.244067132	1.255754704	1.036096066	1.113330984	1.161681131	1.100863474	1.138794661	1.025532426	1.137792138	1.162320296	1.095001583	1.07035335	1.031066817	1.037005098	1.072276039	1.1312917	1.146059574	1.077428498	1.019861719	1.079747488	0.995877351	1.052668347
Q9VPW2_Atg4a	1.06712531	1.332507033	1.262819263	1.200345375	1.150795198	0.929950143	1.141388775	0.763592828	1.013490627	0.858377621	0.895520645	1.036383811	1.161988135	1.091376067	0.968456085	0.962017074	1.192880914	1.043400158	0.951354459	1.116691816	1.111015305	1.273764794	1.229522825	1.087732482	1.228677438	1.228865302	0.997096202	0.938115171	1.266282008	1.202926425	1.08657931	1.13462574	1.251540717	0.994674804	1.199075263	1.114564603	1.054585153	0.971679938	1.211950938	1.172778063	1.120504752	1.127342221	1.168204841	1.167086169	1.127336021	0.91397948	1.203417003	0.907658483	0.866934003
Q9VF80_Atg4b	1.113488975	0.965196714	1.030479896	0.979031561	1.095979248	1.081603978	0.877600979	0.905752754	0.888616891	0.776009792	0.956548348	1.007955936	1.244639719	1.218629174	1.176449912	1.006678383	1.20456942	1	1	1	1	1.049317943	0.960825463	0.951031829	1.061210213	0.923050017	1.115316901	1.272007042	1.161091549	1.115316901	1.245337159	1.416068867	1.18794835	1.263988522	0.973014782	0.895840495	1.007906497	0.889824682	0.993984187	0.992437264	0.897215538	1.190821256	0.993357488	1.048611111	1	1	1	1	1.067936181
Q9W3R7_Atg5	1.064667034	0.928361768	1.069436801	1.036140158	1.20216474	1.122729774	1.11703754	1.078817734	1.104693958	1.000113244	1.097389729	1.17524489	1.092970374	1.041320166	0.933796778	1.175805613	0.995127339	1.095257698	0.816400461	1.235797794	1.169356167	1.095095983	1.11816422	1.011937409	1.100177448	0.960638813	1.157172914	1.185926907	1.249746747	0.992908907	0.97937081	1.060598247	0.879061372	1.019855596	1.093844227	1.075706267	1.065593543	1.02189544	1.071670455	1.095189498	0.938859767	1.16205856	0.889541364	0.955631678	1.038123167	1.18230694	1.012498254	1.164362519	1.028560307
Q9VCE1_Atg6	1.014719482	0.906288533	0.924321825	0.968711467	1.028745376	1.06149815	0.957888665	0.973752524	1.146957023	1.026824344	1.120997981	1.078309778	0.769972261	1.105755895	0.940152566	1.081345354	1.187725381	1.053532609	0.80625	1.048097826	1.06888587	1.113718622	0.956567426	0.927378867	1.090718039	1.000700525	1.219867467	1.313953488	1.304138535	0.956426607	1	1	1	1	0.978360011	0.980595547	1.047214522	0.899847984	1.011714209	1.040955021	0.950371099	1.015509236	0.862590141	0.938160624	0.958841178	0.890680668	0.946652916	0.941965123	1.034422982
Q7JY94_Atg7	1.119454696	0.949339083	0.995612714	0.948162235	1.081494313	1.040323492	1.026758232	0.951648634	1.140215465	0.982161179	1.097798713	1.135318534	1.085541989	1.055929869	0.992052561	1.014592019	1.074467689	1.062884088	0.974022437	1.085133548	1.062305296	1.145963241	1.116023261	1.000023354	1.10796609	1.027779724	1.06968031	1.049698078	1.242632196	0.991090396	0.927558388	1.094935896	0.94397626	0.986845148	1.086145413	1.118199046	1.061376696	0.966183723	1.081703142	1.11582508	0.944991238	1.083183269	0.935878284	0.968445609	1.026331451	0.987951537	0.909058244	0.971310509	0.925709357
Q9W2S2_Atg8a	1.171906901	0.940179665	0.890281748	0.925153124	1.072968559	1.025888118	0.943272293	1.057291667	1.051453025	0.95441879	0.956110669	0.99376327	0.912164399	0.912448105	0.884843441	1.019623048	0.957046802	0.897462846	0.86365564	1.061787808	1.019388207	0.961430408	0.908480549	0.943669349	0.993905052	1.008475787	0.894121165	0.952162051	1.094610756	0.861905296	0.923099963	1.039790341	0.955252714	1.042770498	0.888836536	1.066523568	1.043906951	0.928188751	0.991588573	0.99233897	0.902116818	0.976154605	0.916541119	0.90204686	0.979035509	0.957652349	0.876383935	0.9676539	0.928756027
Q7JQL5_Atg9	1.073626106	1.034256027	1.118171118	1.150965987	1.128155694	1.058020132	1.125574429	0.985669061	1.062974436	0.942437962	1.019981618	1.063212717	1.157397335	1.031105521	0.933981507	1.076862932	1.161238782	1.015085054	0.948111694	1.253503798	1.08906601	1.089864983	1.176705243	0.984438015	1.044625636	1.066324741	1.051456522	0.981064	1.165435746	1.063200717	0.948645074	1.080817176	1.031825984	1.034358556	1.250858888	1.12541884	1.003329516	0.984412775	1.062285278	1.20023752	0.992916826	1.124964659	0.951064933	1.003180662	1.006317511	0.94916262	0.925602022	1.018035874	0.991731803
Q9VK99_atilla	0.745889762	1.072174291	0.929924989	0.851248048	1.090581398	0.669665395	0.765396487	0.605952365	0.762633274	0.566809096	0.673145615	0.771340765	1.064810654	0.885383899	0.868964761	0.72841563	1.087444511	0.767357638	0.970690726	1.105603925	0.99310432	0.9244211	0.814723938	0.954219768	0.901540313	0.996478085	0.723240631	0.784140926	0.767990707	0.636921508	0.970968051	0.874545628	1.165359352	0.752694343	0.721084598	0.848172926	0.779962503	0.919375813	0.885429886	0.937952068	1.033945927	0.692075842	1.282206568	1.166529983	0.647223425	0.479256201	0.996462625	0.695321162	0.572121842
Q9VC57_atl	1.037995215	0.955153277	1.022073462	1.038689588	1.072665036	1.042655108	1.116155523	0.983018322	1.040962036	1.002130647	1.028777841	1.153336014	1.144963482	1.050664398	0.996813197	1.062683403	1.056980324	0.880392642	0.932943284	0.980715523	0.977192114	1.111602244	1.096642178	1.005075601	1.026787892	0.961163273	0.999992799	1.006185864	1.068815036	0.965333237	0.921859796	1.006005541	0.919095636	0.963353187	1.076443668	1.074455324	1.05819654	0.980951015	1.024968382	1.113322555	0.976061645	1.084673109	0.976996167	0.971397722	0.970172761	1.052868938	0.951939222	1.026420593	0.959235348
Q9VN55_atms	1.075936241	0.940892392	1.001511022	1.066544205	1.064055463	0.990489452	0.989797449	0.985196299	1.015953988	0.917129282	0.966691673	1.088822206	1.04730559	0.980624047	0.935772993	1.004016512	1.038640336	1.095213907	0.933513941	1.036798736	1.113161756	1.174805496	1.07112509	0.956022734	1.146829995	1.049771009	0.939944447	0.946037364	1.159535863	0.964741723	0.889292353	1.012968487	0.972247439	1.013530454	1.08758944	1.029293677	1.016687975	0.869053227	1.111051298	1.166408721	0.893344997	1.11536669	0.837066484	0.914928033	1.103802342	0.986001925	0.896678967	0.913645115	0.926320051
Q95RR1_Atox1	1.024583363	1.115359914	0.886730891	1.126498371	0.973677425	0.72075569	1.071617696	0.806638411	1.035349302	0.938411353	0.840782894	1.092747274	1.055045341	0.926625506	0.920001286	0.85268506	1.121892083	0.875818362	0.995470667	1.06753881	1.132036746	1.060530161	1.068490348	1.072533877	1.10215232	1.216030056	0.955976286	0.858317624	1.201486217	1.040570445	0.924261126	0.988525674	1.057547305	0.933761425	1.07657664	1.037728856	1.016776928	0.973621271	1.106486985	1.095087906	1.049757332	1.049510393	1.091557891	1.095051756	1.036285792	0.79840975	1.03366709	0.742524465	0.908314328
Q9VHG4_ATP6AP2	0.906377361	0.829267359	0.878709603	0.8525917	1.022884258	1.197902914	0.89463426	1.127052697	0.971025876	0.867303748	0.966429579	1.025032363	1.012513013	0.897085155	0.818717468	1.083656048	0.877680616	0.921197395	0.801807756	0.989172903	0.965827583	1.023294093	0.954182727	0.870903219	0.950515679	0.869257214	0.989484293	1.149729976	1.132482696	0.93095383	0.876476631	0.970163888	0.881752813	0.923448662	0.911682149	0.936727261	0.978847825	0.841742966	0.923110339	1.089169953	0.79105126	0.980237509	0.780708216	0.840965847	0.920316248	1.107066714	0.767455805	1.323532025	0.981844333
Q9VYT4_ATP7	1.082685823	0.948101451	1.101402531	1.089576308	1.12197625	1.005180081	1.17157298	1.003824875	1.077385424	0.974762653	1.016050816	1.316576737	1.247050625	1.071133456	0.999701329	1.042311713	1.112250485	0.882876044	0.851209196	1.154647001	1.024292376	1.205598838	1.072098244	1.021259739	1.049319952	0.998085303	0.992344805	0.980733355	1.105757478	0.947893213	0.873329734	0.968551761	0.883250101	0.965244972	1.120748758	0.997920117	0.955244001	0.896545083	1.030273851	1.088780187	0.932018642	1.160230435	1.078797051	1.135527022	0.976416134	1.03052678	1.05708618	1.022040996	1.036793018
Q8T0I4_ATP8A	0.993570296	0.862824481	0.855884887	0.905604193	1.036135855	1.13675741	0.918111323	1.051858769	1.008383744	0.970761777	1.051391877	0.979057556	1.052114413	1.048175996	1.002737001	1.160663564	0.953725584	1.026983791	0.8939253	0.998435518	0.986976744	0.985926741	0.980231139	0.913471052	1.003289788	0.921014962	1.053977128	1.11314632	1.144455087	0.907324797	0.928446771	0.976730657	0.89381716	0.991888658	0.944258286	0.988449004	0.971193756	0.964207081	0.918623625	0.959036023	0.907169156	0.98234351	0.883670115	0.920978751	0.96960367	1.083986553	0.883174414	1.102774156	1.049899658
P13607_Atpalpha	0.936903788	0.915609678	0.891596926	0.874261039	0.921236013	1.081643472	0.89153163	0.978010192	0.942807733	1.042676007	0.958178023	0.882542263	0.871912285	1.016721961	0.968532403	1.049499025	0.900206191	1.0406294	0.902417199	0.98145526	0.878138069	0.865076631	0.896481325	0.911166107	0.910584424	0.871742752	1.005847049	1.011951072	0.85636003	0.925132804	0.959761485	0.950973113	0.915480317	1.023274905	0.90532256	0.976064336	0.950324116	1.019721169	0.927370088	0.837170192	0.957764171	0.903797377	0.949263608	0.969273007	0.974029177	1.064134868	0.881406764	1.090455392	1.074119498
Q7KN85_ATPCL	1.170820747	1.131737458	1.224641859	1.092263028	1.168470664	1.040548245	1.133017242	0.960847016	1.274574192	0.913873755	1.066181062	1.129582363	1.100670008	1.21734443	1.009800151	1.054513184	1.113247376	1.004861578	1.150232839	1.154579817	1.26274053	1.267772175	1.15473929	1.06470308	1.234220101	1.043447546	1.034514228	1.016748488	1.132449715	1.077930562	1.091058303	1.315658078	1.158078409	0.919563897	1.163545635	1.239236506	1.341006756	1.078709321	1.243551311	1.198370228	1.042564455	1.164833316	1.052926162	1.153870772	0.948800378	0.963181092	1.085828856	0.964771479	1.047406569
Q94516_ATPsynB	0.798114497	0.918364603	0.948654907	0.858412495	0.798215891	1.186190952	0.922237281	0.96579207	0.853420824	0.960218837	1.013816293	0.844013566	0.856243476	0.947957189	0.94656703	0.860630848	0.820781102	1.027255341	1.064304271	0.864016516	0.886064476	0.799516806	0.904487017	1.013167648	0.862685064	0.839328293	0.956736039	0.974397731	0.78193623	0.968505857	1.084280202	0.883744098	1.015148781	1.029045564	0.927795741	0.951364646	0.95306604	1.099651602	0.914784661	0.872368045	1.076563642	0.885648362	1.033470216	1.057342742	0.920076812	1.0762082	1.032721594	1.10362707	0.976008294
Q05825_ATPsynbeta	0.958946526	0.856258416	0.811604543	0.94079055	0.946298701	1.110724885	0.843068325	1.218251636	0.935875346	1.106071507	1.0974203	0.85121456	0.866173622	1.000735786	0.945902324	1.008293503	0.832716382	1.056045591	0.93017223	0.917537266	0.937814703	0.880752774	0.84179065	0.902240984	0.94780954	0.823776966	1.107156452	1.066637847	0.958421279	0.906970774	0.909498006	0.92236473	0.860540062	1.058032935	0.830573033	0.948067163	0.980809625	0.968774467	0.95517967	0.924948091	0.917030811	0.849094508	0.904034254	0.876583268	1.090008805	1.128281435	0.952687909	1.162439524	1.101135997
Q8T4C4_ATPsynbetaL	0.986808542	0.90678522	0.877887909	0.939472342	1.007652503	1.182275344	0.864668509	1.239579475	0.989088008	1.150374655	1.163850822	0.916863728	0.924604669	0.982163027	1.116834526	1.146719691	0.968985316	1.27619698	1.037142424	1.07284316	1.210182867	1.093622651	1.003281291	1.097433183	1.135750198	1.067954485	1.187798553	1.164323734	1.266002457	0.946226286	0.962291169	0.908432776	0.842641209	1.007637232	0.97766288	1.080459477	1.150807396	1.015664001	1.147572717	1.149432021	0.961464011	0.87418382	0.87219278	0.862852458	1.123672937	1.105121997	0.979549264	1.120804619	1.005641749
Q6NN09_ATPsynC	1.59085689	0.497546079	0.557655565	1.266305831	1.929693736	0.895838376	1.047854058	0.650680062	1.422308393	1.444399401	0.747428101	0.749848712	1.562351122	0.650445686	0.803408063	0.899422093	0.664938239	0.941640995	0.742520874	1.622441096	1.807364212	0.711277099	0.937819165	0.796921364	2.055868971	0.866908689	0.810444282	0.612770372	2.596527739	0.699308173	0.617873881	1.391992391	0.656181604	1.486959561	1.830372671	1.613298809	0.476287846	0.708503037	1.564646526	1.966616844	0.728817421	1.917215927	0.575492834	0.584049288	1.541809546	0.859917787	0.797970224	0.753083001	0.969459497
D1Z3A2_ATPsynCF6	0.889228806	0.792126804	0.723961278	0.841008862	0.844312988	0.865115612	0.833768062	1.22962583	0.970373119	1.112060122	1.10941674	0.897790413	0.725366946	0.961543276	0.760757068	0.816447787	0.639166659	1.049506107	0.881660867	0.927393371	1.007079872	0.858514624	0.823966295	0.9609937	0.992589396	0.758091034	0.938868915	1.087237783	0.816164214	0.96577083	0.923190295	0.921167468	0.86999158	1.007277441	0.804686107	0.966986813	1.026811711	0.956672275	0.969254939	0.957015755	0.957741845	0.875358791	0.90773819	0.91950203	1.098153959	1.117573827	0.989127898	1.150598161	1.079628351
A0A0B4LHL7_ATPsynD	0.97164254	0.920290495	0.858005917	0.960552061	0.938988338	1.032692649	0.851704076	1.139926522	0.935036739	1.057752391	1.085642677	0.869205838	0.854715861	0.962818569	1.081374663	1.116139459	0.964752151	1.056118397	0.975036261	0.891195271	0.945901229	0.874239168	0.882546556	0.945960719	0.938862303	0.975833445	1.077057262	1.066238157	0.960520971	0.903298736	1.008991195	0.908585372	0.942655383	1.04742196	0.832639162	0.951384118	1.011060941	0.965889143	0.958831624	0.903826911	0.987948123	0.808087565	0.914164671	0.889276533	1.066830688	1.099174837	0.988760904	1.15116959	1.087265483
Q9W2X6_ATPsyndelta	0.911996192	0.848442719	0.72108628	0.898520275	0.882797279	0.932141128	0.81252138	1.251949959	0.931313224	1.121928988	1.09904154	0.773256617	0.866369353	0.997427047	1.05326756	1.049810876	0.845747253	0.993229137	0.897702222	0.919912863	0.860386385	0.852307915	0.824568537	0.933526687	0.984964124	0.893185775	1.05345658	1.121929516	0.978278217	0.874452562	0.952713077	0.911116263	0.86167693	0.91905285	0.831844794	1.002920366	1.058068805	0.971287452	1.011209645	0.992122904	0.93378925	0.910413455	0.85713231	0.88212342	1.11372815	1.145151972	0.970470869	1.205008893	1.135668646
O77134_ATPsynE	1.124980805	0.907409398	0.856065725	0.93490863	1.071671529	1.177656634	0.885712811	1.235203325	1.06813789	1.176574903	1.203273659	0.981206253	0.984423192	1.142428627	1.054762325	1.144927127	0.931587677	1.121142331	0.907000258	1.07205851	1.070845176	0.88392955	0.855639826	0.970593688	1.032309443	0.98031433	1.03033093	0.944741741	0.992453452	0.990881422	1.247695502	1.039447701	0.821248215	1.383124283	0.727060013	0.785067431	0.826770061	0.785138233	0.775286581	0.814184086	0.732454484	1.029889815	0.904560914	0.985127553	1.174987835	1.226475061	0.985307178	1.196815693	1.129027839
Q9VH24_ATPsynepsilonL	0.99255121	0.867783985	0.813780261	1.059590317	0.782122905	1.126629423	0.85828466	1.081463265	0.941899785	0.871810636	0.972025822	0.984322164	0.980817104	0.869527017	1.073070728	1.101625421	1.008200322	1.14742653	1.010066569	0.995940899	1.142068518	1.043886412	1.057732927	0.96878667	1.049284206	1.073339592	1.104443887	1.078835049	1.17273412	1.027366307	1.21399653	0.975130133	0.963562753	1.137073453	1.049555273	0.941550191	0.991105464	1.034307497	0.780177891	1.137229987	0.940279543	1	1	1	1	1	1	1	1
Q9W141_ATPsynF	0.999650341	0.956844034	0.91079089	1.01497941	0.996988933	1.155080951	0.93401649	1.030704745	0.978491403	1.114178499	1.156258757	0.914580214	0.932695571	0.979779799	1.087301941	1.18378483	0.987182303	1.076262023	0.943167564	0.919219244	0.806882927	0.837779538	0.795068613	0.821038639	0.76606713	0.717418925	1.095695398	1.041182931	0.665425623	0.934088115	0.977368132	0.947695285	0.924468631	1.206091678	0.929311801	0.989699753	0.974454128	1.024104782	0.978098195	0.953079935	0.913851587	0.906825308	0.983473516	0.999924384	1.03431228	1.178035726	1.002541955	1.060336434	1.135104215
Q9VKM3_ATPsynG	0.989311783	0.938011212	0.90341382	0.993961122	0.965584372	1.157374367	0.9130936	1.047633771	0.957185038	1.099876548	1.157512329	0.922934394	0.915938006	1.020994557	1.105079396	1.195532279	0.995457652	1.109909832	0.966515374	0.961362157	1.016634701	0.899224806	0.933588181	1.002438245	0.962716336	0.874474283	1.328471071	0.882872163	0.807062917	0.874978182	0.959077931	0.990020836	0.926981887	1.101566548	0.946577806	0.973316651	1.014433931	1.025697039	0.985215437	0.967789782	1.023643697	0.902298699	0.961400198	0.998002277	1.046286021	1.16167277	1.004670218	1.11538675	0.863948482
O01666_ATPsyngamma	0.898591171	1.012854321	0.894219025	0.934475147	0.904749469	1.154911485	0.873867871	1.058051576	0.87011963	1.077006059	0.990357983	0.80149043	0.820501948	0.962901628	1.186423818	0.968091737	0.872430883	1.038213462	1.021338401	0.856497061	0.889954945	0.804546255	0.873447608	0.998860008	0.91877886	0.909023472	0.994458924	1.093932503	0.871008469	0.962399312	1.080214607	0.881379756	0.994813467	0.974958754	0.853322455	0.898042798	0.941745076	1.057956511	0.909538146	0.796309073	1.083761518	0.821998685	1.024614865	0.955972307	1.018665953	1.008938248	0.944895201	1.057035812	1.114963594
Q9VLY0_ATPsynGL	1.072873343	1.013046106	1.006078703	1.043084142	1.065443816	1.106537272	0.99570096	0.962417196	0.953738002	1.015573881	1.037799108	1.056887928	1	1	1	1	1	1.001675884	0.925925926	1.04725993	0.960616725	0.945954907	1.143899204	1.105769231	0.942639257	0.897214854	1.00819211	1.01691161	1.196083257	0.991104704	1	1	1	1	0.975990565	1.071298194	1.029035972	1.09508298	1.020330797	1.066131252	1.082895734	1.078300921	0.830603889	0.837427499	1.049402688	1.037705326	0.911274266	1.083001493	1
Q24439_ATPsynO	0.946053082	0.866670773	0.81602009	0.905817688	1.011369304	1.206331655	0.879315944	1.207657371	0.99321636	1.140786858	1.126279751	0.917170679	0.889989651	1.020723693	0.900390672	0.94117132	0.770956309	1.097971506	0.939853147	0.937917566	0.99748248	0.857349036	0.861537244	0.894214856	0.948599714	0.795363437	1.095423233	1.072899631	0.9131088	0.894760961	0.968852258	0.953947335	0.885522559	1.049220117	0.868838803	0.969073644	1.042224542	1.007103075	0.981466378	0.942214001	0.952049882	0.894213734	0.905694578	0.937895672	1.077121545	1.004065729	0.85652589	1.043027278	1.114848457
A1ZAA9_ATPW	0.933986542	0.925918113	0.842554897	0.865167591	0.951874196	1.098856709	0.801501581	1.010142255	0.920804795	0.906875659	0.902298472	0.873979189	0.893448958	0.990083891	1.097313602	1.146385145	1.107437082	0.901621865	0.853416429	0.892070882	0.846373329	0.973068754	0.940645696	1.092669624	0.932565066	0.967690046	1.052278242	1.12518199	1.114478296	0.892127258	0.971462741	0.875367371	0.935113678	0.87540554	0.852214673	1.037204403	1.007731606	0.995238848	0.987812714	0.984979196	0.968578501	0.892531528	0.914568438	0.902191946	0.912662866	1.04439468	0.882478284	1.178854506	0.996231549
Q9V751_AttB	1.115788832	0.620403936	1.088341914	0.737350352	0.89450757	17.6603558	0.887793285	1.777619337	0.537853964	0.678398058	1.098139159	2.421177184	1.799007658	0.958943987	0.973958184	1.457811111	0.435053202	0.629400212	0.470630005	1.160628494	0.417374226	2.208181252	0.370194949	0.505499335	1.571503558	0.352531159	2.39275361	2.55429946	0.713853962	0.334370126	0.800056316	0.452328659	0.344112181	0.682964465	0.712858471	0.605221418	1.733988441	0.47849629	0.468614975	0.366429053	0.464002479	1.525887102	0.286741271	0.303509455	0.597154291	1.196326572	0.513059935	4.96258166	1.015116945
Q95NH6_AttC	0.709634082	0.478615551	1.257472092	0.77810864	0.992784133	3.83053101	0.883473443	1.721941475	0.650800823	0.702215194	0.838372909	1.872783915	1.750978708	0.724143157	0.956469578	1.369686561	0.532505746	0.677427106	0.583904569	1.588229474	0.499922265	1.603111084	0.338894703	0.430257136	1.314668883	0.346651891	2.250189919	2.64965124	0.418581478	0.23078365	0.759296694	0.55897246	0.435243375	0.723771115	0.737309624	0.625775	1.874691227	0.419588084	0.375746372	0.290075087	0.396358521	1.542813678	0.203424319	0.241688711	0.24786097	1.32065212	0.294421253	6.45740198	1.265969918
Q94546_Atu	1.013723366	0.969423378	1.116528229	1.077524979	0.992054893	0.94919947	1.066141732	0.989291339	0.865511811	0.903937008	1.088188976	1.026141732	1.189716312	1.418439716	1.508865248	1.446808511	1.182624113	0.986427657	0.929769526	1.022279129	1.034635083	1.057764245	1.105959113	0.879425837	0.934406264	1.045150065	0.944977757	0.956138297	1.152189183	0.924685866	0.755003228	0.840542285	0.901872176	1.009683667	1.105549376	0.909982285	0.889465661	0.810365427	0.988752935	1.070407449	0.882503193	1.139405839	0.866569916	0.948096295	0.986027014	0.856427573	0.95330694	1.067652538	0.843998926
Q8SWR8_Atx2	0.944059359	1.019348173	1.187902696	1.075457875	1.010087349	0.883817038	1.216966061	0.893761071	0.937317293	0.92475467	0.888772971	1.220606614	1.251198252	0.914706735	0.953385202	0.924270459	1.094076733	0.92157388	0.925290917	1.041239012	0.996735036	1.297850373	1.294885371	1.015923651	1.031291364	1.015632446	0.941372666	0.942625571	1.105062602	1.018577563	0.898966078	0.922089127	1.066938928	0.95264664	1.238371355	0.919396124	0.874694965	0.897776882	0.97120917	1.154954068	0.926948306	1.17244381	0.898380307	0.932657867	0.941920423	0.825337985	0.915445987	0.893781586	0.944565425
A0A0B4KF57_aux	1.078292438	0.953199493	1.065870621	1.05611687	1.10969689	1.104404496	1.031389026	0.992585269	1.011492832	0.997281265	0.974789916	0.97973307	1.166060205	0.960469732	0.947237843	1.099569964	1.099900761	0.986383972	0.992608442	1.142190235	0.923166699	1.201770268	1.100683967	1.016596258	0.982699658	1.093844297	0.933953226	0.906001691	1.05905889	0.970752325	0.961263081	1.009730127	0.962639985	1.042225078	1.097691536	0.989795918	0.981543437	0.901973904	0.972789116	1.021244563	0.862384298	1.101209253	0.919065457	0.958760515	1.087217771	1.056445739	0.982520029	1.12199563	0.950456827
Q9VYK8_Aven	1.149981529	0.822558798	1.190863194	0.963181874	1.157000369	0.880310307	1.128584644	0.832562442	0.857539315	1.068455134	1.143385754	0.884366327	1.099266126	1.23986095	1.060641174	1.09578988	1.081691773	0.852026144	0.784575163	1.066405229	0.847058824	1.48694517	1.329634465	1.084856397	1.535248042	1.103785901	1	1	1	1	1	1	1	1	0.969326517	1.214269838	1.112024894	0.785285619	1.170482329	1.255612358	0.858857524	1.346138535	0.830214968	0.848128981	1.392575928	0.899887514	1.177165354	1.165354331	1.391742195
A0A0B4LJ12_awd	0.961480413	1.174599013	1.225256444	1.16127274	0.88073279	0.908989456	1.122247658	0.883772773	1.006518081	1.090823339	0.922713865	0.93489158	0.909650557	0.943685743	1.048105288	0.931504067	1.044091476	0.964607625	1.223648223	0.844175845	1.039359669	0.939001071	1.146026976	1.183744402	1.079113022	1.18547446	1.004655109	0.913452797	0.903854562	1.295480571	1.027217293	1.030524921	1.138419771	1.168778082	1.118542362	0.993414625	0.998696002	1.013417352	1.027710886	1.020004596	1.180728856	0.84234384	1.172360698	1.138727113	1.039628848	0.91132289	1.222150895	0.929486352	0.97375826
Q9VRX8_axed	0.948283569	0.998614339	0.976957804	0.941020025	0.986433935	1.065796531	1.017452655	0.92563211	1.018094049	0.951557911	0.93680586	1.015798535	0.909185673	0.858900054	1.113330276	1.152232832	1.078513947	0.979596569	1.03118479	0.967539995	0.936760955	1.023288272	1.086453723	1.003150297	1.000159509	1.054791243	1.091637761	1.122714915	1.173853942	0.935080154	1.003131132	0.905565065	1.029307394	1.002671899	1.027207918	0.979267043	0.92347773	1.035274368	0.986352438	0.965401469	0.978111579	0.923389692	1.038261277	1.049318434	0.834643042	0.956038253	1.013603677	1.231633183	1.125741818
M9PBP8_axo	0.996561989	0.901287016	0.871772948	0.932421604	0.938227723	1.136643015	0.918564206	1.037831248	1.207396517	1.116505899	1.09249232	0.983373376	0.975256027	1.040137396	1.003593919	1.168140279	0.97811844	1.028633651	0.901647509	0.978319677	0.966922859	0.979643648	0.905229974	1.175126007	1.029227965	0.965331895	1.105712405	1.166739426	1.167671186	0.909019828	0.967132975	0.953404763	0.884811163	1.009741454	0.948305085	1.197493435	0.98016233	1.010432084	1.009966579	1.149552399	0.955412986	0.971401251	0.894291698	0.93366464	0.995986977	1.144140733	0.933292951	1.084837165	1.075960852
O97132_Axs	0.994907916	0.8226613	0.833546774	0.932491767	1.035797048	0.974295646	0.952342307	0.969580791	1.042116752	0.994151229	1.045866682	1.032462081	1.042391014	1.020504591	0.96852991	1.021396095	0.926540073	1.001098844	0.866228873	1.10899482	1.061666056	1.081577095	0.951232105	0.941140577	1.055761558	0.963248064	1.027357673	1.076750795	1.215273095	0.879948945	1.024260712	1.166686783	0.855401328	1.192757996	0.919422243	0.934440788	0.973880792	0.912134984	1.013738703	1.031395288	0.862874158	0.992976274	0.84238855	0.88617219	0.974068603	1.033699874	0.872586028	1.000054708	0.982604767
X2J8B3_b	0.996275098	0.810279822	0.783296993	0.923162533	0.913055328	1.091827928	0.714740376	1.2105332	1.034442168	1.00789118	1.230348345	0.830906396	0.97269605	1.044018317	1.035260446	1.079107041	0.919633658	1.024647887	0.916279592	0.844958046	0.926880432	0.905673009	0.806589147	0.999506695	0.999647639	0.944009866	1.082488668	1.106593257	1.223127955	0.914593101	0.907959548	0.942177275	0.811088638	0.972587745	0.836634797	1.05404477	1.108232667	0.95119368	1.013368065	0.990639492	0.984112899	0.857531653	0.933901313	0.920269791	0.985812728	1.063288745	0.936224834	1.164896636	0.96402386
Q9VJX3_B4	0.990166738	0.865204911	0.922127893	0.979967019	0.986929701	1.043791608	1.115384615	1.133766968	1.046662896	1.10831448	1.170531674	1.182409502	1.045549271	1.199464126	1.05328967	1.160166716	0.884191724	1	1	1	1	1.2103265	1.074411541	0.939002784	1.17868894	0.943052392	0.990971766	1.01083388	1.205597505	0.932698621	0.864888889	1.012444444	0.946666667	0.96	1.017050569	1.083717236	1.117818374	0.967699232	1.143870797	1.11924808	0.931744771	1.128442211	0.867336683	0.966030151	1.142870869	1.083301307	0.954073789	1.111356649	0.93710815
P26686_B52	1.094696057	0.959913069	1.126098026	1.076133167	1.110409194	0.848231918	1.227629908	0.878848744	0.925559932	0.874358255	0.857312479	1.266766557	1.285493172	0.885477328	0.83988032	0.846073535	1.044752018	0.884293154	0.857164618	1.107521635	1.036206289	1.279461435	1.230044412	0.885228242	1.10553437	1.08159607	0.857518766	0.85270855	1.149694656	1.030559126	0.814805683	0.962427401	1.023852114	0.957634739	1.181824664	0.910963435	0.896731767	0.801010181	1.053307848	1.065586499	0.887873866	1.262243555	0.89087667	0.930674479	1.094795863	0.828620577	0.892378879	0.835375068	0.848206288
Q9V3N9_b6	0.714953757	0.659461706	0.795178219	0.767224358	0.896497974	0.694585888	1.061045131	0.936104513	1.071258907	0.894299287	0.862945368	1.124465558	0.894450119	0.713539893	0.691975939	0.715696289	0.782771536	0.682074144	0.660957297	0.965978414	0.835992492	1.32245748	1.019090594	1.130163138	1.308573412	1.040610899	1	1	1	1	0.963570128	1.178506375	0.74863388	1.010928962	0.762426422	0.677894048	0.64323087	0.625981033	0.71263898	0.885791367	0.581589274	0.964458805	0.746688207	0.809693053	0.634914308	0.833001196	0.629334396	1.046632124	0.692766592
Q9W258_babos	1.013109978	1.071628663	1.250070032	1.18359572	1.150750742	0.942853941	1.294742493	0.941017236	0.978949412	1.097600256	0.935923062	1.174675332	1.179565173	0.929151781	0.89558028	0.945544554	1.119628458	0.966216216	0.964491087	1.11951313	0.984198294	1.172085156	1.290315483	0.967915395	1.005624777	1.026721127	0.902331309	0.931393971	1.074809273	1.093891193	0.933433848	1.001234452	1.128759894	1.018441387	1.354496289	0.862917187	0.850530751	0.913885422	0.972784734	1.119006401	1.06285814	1.14426096	1.037316201	1.0407456	1.036000149	0.874559645	1.041191042	0.950655397	0.910710914
Q9VQF7_Bacc	1.088202703	0.792289189	1.082045946	0.985621622	0.928143243	0.724716216	0.988862867	0.983756779	1.028039117	1.057516758	0.999857492	0.824271529	1.028795075	0.875460055	0.935814988	0.926070552	1.083581249	0.934645552	0.920364526	1.012695114	1.05102264	1.077442207	1.006814012	0.848773478	1.166074832	1.220278142	1.086369374	0.742821532	0.87841604	1.166032412	0.921093645	0.913413556	1.047403006	0.987502061	1.17179869	0.955360811	1.008010407	0.897519284	1.008851956	1.009633598	0.803924757	1.416756627	0.809066704	0.878925926	1.116287958	0.869839909	0.937984187	0.915132058	0.930776514
Q9VLU0_baf	0.922947335	0.865065431	0.875372291	0.944456686	0.964835837	0.765223943	0.875201258	1.06984362	0.869427223	0.940325715	0.919681688	0.938798927	1.031367607	0.919401257	0.914939632	0.964170768	0.986189398	0.940267977	0.873574883	0.944691984	0.947102196	1.042675109	1.045908931	0.872144875	0.971304081	0.992397681	0.874380073	0.983751693	0.867866328	0.957103827	0.839116748	0.99616644	0.900002706	1.017057088	0.883988922	0.875166239	0.85679422	0.866665753	0.898953892	0.955831745	0.888437967	0.934759088	0.856036017	0.855633295	0.943934378	0.95460899	0.905429265	1.056499669	0.870630495
Q8SXY6_bai	1.069712438	1.051412285	1.169806023	1.115007657	1.10271397	1.046077931	1.318811614	1.025514292	1.010686473	1.102291245	0.977762773	1.212325006	1.230549682	1.060618666	1.046278642	1.085993922	1.167319536	1.07200704	1.174021984	1.089859655	0.993914898	1.231802843	1.312935883	1.047284998	1.003323448	1.102219041	1.093472998	1.106079458	1.070401343	1.132256913	1.139535703	0.999412877	1.190826787	1.108476885	0.863849951	1.035708635	1.119094706	0.992041895	0.989834826	0.768661203	0.724891624	1.259367194	1.038178969	1.113843039	0.998997527	1.122690849	1.061559769	1.12619291	1.072721607
Q961J5_Balat	0.963401481	1.051968427	0.996788743	0.929009168	0.857135853	1.064715399	0.973999841	0.995796143	1.01785145	1.02851052	1.068178196	0.972027415	0.944870644	1.019342202	0.987023586	1.010691259	1.080306864	1.019696649	0.887831739	1.020739317	1.015640019	0.976076266	1.024810545	0.958541599	1.047565302	0.983835859	1.025381405	1.028579736	1.197424232	0.984555654	0.9331651	1.051467957	1.033351538	1.085779929	0.966065244	0.942995196	0.973299073	1.098005809	0.953217518	0.917383533	1.0437102	0.752124788	1.116738326	1.117888211	1.039689255	1.058841628	0.947850165	1.034228136	0.927414394
Q9VV87_Baldspot	1.147474951	1.107295705	0.94798852	1.132621721	1.122803484	0.914103016	0.995133684	0.842655778	1.21339076	1.031547153	1.079874706	0.991441996	1.005025561	1.1953037	0.986742917	1.032579499	1.042110736	1.127033915	1.018689146	1.125204208	1.09246553	1.017449469	0.993311037	1.03242693	1.092773011	0.999854588	1.1497836	1.046642882	1.339513393	1.037957656	1.153395052	1.253945244	1.009751919	1.001087207	1.023914918	1.183156079	1.425869503	1.093302673	1.06964645	1.092929003	1.013135959	0.918155263	0.954050107	1.06049882	1.028536361	0.930653575	0.994016569	0.857164774	1.203461632
A4V3G8_ball	0.973001245	0.938032379	1.028194271	1.010759651	0.966625156	0.988891656	1.026298101	0.98512855	1.079734498	0.941354394	1.021004873	1.130230213	1.155605719	0.99006772	1.034161023	1.062302483	1.15214447	1	1	1	1	1.308235867	1.051413255	0.95297271	0.916423002	0.998781676	1.074406573	1.069993914	1.179549604	1.003347535	1	1	1	1	1.069924653	1.017322724	0.938173368	0.929230336	0.976621365	1.152101965	0.918104359	1.194478378	0.866031436	0.958384233	1.082790563	1.025618758	0.900419742	1.041105804	0.96833825
Q9W384_Bap111	1.059066959	0.871223072	1.045696167	0.987701669	1.063181945	0.885701296	1.044707911	0.883099806	1.031084285	0.945419271	0.976956241	1.137637422	1.115380718	0.928010538	0.893282334	0.934571154	1.002406404	1.074383302	0.910273787	1.058986175	1.024396856	1.121602252	1.081676266	0.957389695	1.142868312	0.96695421	0.943780554	0.965633226	1.079054026	0.983683617	0.951059422	0.96024358	1.017245252	1.034540418	1.071183781	0.967056299	0.922158245	0.8703599	0.991565028	1.124170638	0.927246922	1.122102439	0.872990742	0.952321675	1.067221036	0.924867963	0.880750646	1.015664681	0.976195304
A1Z6M0_Bap170	1.109675503	0.988490384	1.087101804	1.112348704	1.212816514	1.07388431	1.003008611	1.013590621	1.016391742	1.053013798	1.058616039	1.085797282	1.242335437	1.202209197	1.129283138	1.026262399	1.079576195	1.22270519	0.989772437	1.043722833	1.15034518	1.211267606	1.154929577	0.865191147	1.036217304	1.038229376	0.929950726	0.869623119	1.092022906	0.840258357	0.903833866	1.039936102	0.92971246	0.918530351	1.254179238	1.102585012	1.014025932	0.977737911	1.16537552	1.167006442	0.98719726	1.238436263	0.874715646	0.9074901	1.307703595	1.088481291	0.926632428	0.934262656	1.038126689
Q7K012_Bap55	1.076012488	0.993380164	1.107145954	1.052973145	1.085927789	0.925721967	1.195456041	0.920255598	0.997125392	0.978856044	0.966422498	1.205482536	1.197523948	0.962747185	0.932860904	0.963839561	1.104223853	0.91038707	0.901585341	1.098852172	1.024269096	1.213514625	1.215185318	0.913303861	1.098159667	1.094972498	0.978993471	0.99284237	1.180887303	1.040654528	0.957887456	0.983439801	1.092769663	1.007262888	1.177317894	1.004247135	0.947531854	0.901414376	1.124849748	1.142399231	0.913454604	1.171761388	0.93811242	0.952581549	0.977496256	0.931234063	0.912878941	0.839215607	0.980909684
Q9VYG2_Bap60	1.038610717	1.05632813	1.094019866	1.004108386	1.038151226	0.906277451	1.107068082	0.866038553	1.037506317	0.956032055	0.962890766	1.173760017	1.103391036	1.015562011	0.990988855	0.991344558	1.076061181	0.961873805	0.907342256	1.046386233	1.004512428	1.149262318	1.179474807	1.053447156	1.017964183	1.001373295	1.041967651	1.023824999	1.191992721	0.975097955	0.913385827	0.990844168	0.991095953	0.983931514	1.173177518	1.026043406	0.999485253	0.955787423	1.078631052	1.123789649	0.957943795	1.123220526	0.997209128	0.969534933	1.213607284	0.966331143	0.946636389	0.893294613	1.037228633
Q7K204_barc	1.027979527	0.927565196	0.896368511	0.918888618	1.075846941	0.928735072	0.902324542	0.853375056	1.004246759	1.136119803	1.174787662	1.101698704	1.074085711	0.979954757	0.92534875	0.938419002	1.042603996	1.058284631	0.904754383	1.172326647	1.042331385	1.008283243	0.928382935	0.902800176	1.028954699	0.869373992	0.999116788	0.946056118	1.207215164	0.849785991	0.93476544	1.027009951	0.913599747	1.054651714	0.911056068	1.030473617	1.006755235	0.882308789	1.064925317	1.11566464	0.869736546	0.99954392	0.852777524	0.852686308	1.155556654	0.987300489	0.891732964	0.998863468	1.019479337
M9NDE3_bark	1.034526657	0.949511059	1.013940767	0.999678236	1.077552077	1.001720737	1.059103319	1.032461561	1.029918092	1.000086219	1.06503808	1.205589884	1.217648087	1.003758366	0.951141245	1.001311058	1.016893917	0.993621657	0.860771497	1.168083449	1.119370971	1.170518366	1.12964517	0.907591505	1.053461149	0.944795903	1.011856876	1.010377861	1.148854537	0.93824647	0.931068943	0.976810268	0.941255087	1.013810292	1.076378156	0.996579015	0.968705141	0.92447434	1.03775183	1.066071203	0.90657742	1.118471243	0.91106738	0.937600248	1.009528308	0.950900871	0.860577637	0.979897429	1.046713375
X2JCB3_baz	1.030718954	0.929803922	1.018431373	1.108104575	1.080784314	0.933071895	0.98589859	0.900990099	0.914491449	0.867386739	0.936393639	1.115211521	1	1	1	1	1	0.899135447	0.761167147	1.159942363	1.159582133	1.210227273	0.984090909	0.886363636	0.969318182	0.619318182	1.131124372	1.170854271	1.235552764	0.936086683	0.700331126	0.951434879	0.870309051	0.809050773	1.048231132	1.039091981	1.036379717	0.945106132	1.085731132	1.109787736	0.898997642	0.996150144	0.758229066	0.874302214	1.224552745	0.998766194	0.991980259	0.941394201	0.929913092
A1Z9D9_bbc	0.853842737	1.003553976	1.025766326	1.042647712	0.870279876	0.880497557	1.146086957	1.056521739	1.233043478	0.973043478	1.122608696	1.066086957	1.013468013	1.142638506	1.016835017	1.13973064	1.066574839	0.937662338	1.035714286	1.148701299	1.153246753	1.05062167	1.030491415	0.941385435	1.059502664	0.830965068	1.121905039	1.030002913	1.187736673	0.931401107	0.997806483	0.99463807	0.915184012	1.004874482	1.048600884	1.009491082	0.852397316	0.914580265	0.944689903	0.902961872	0.880379643	0.848014888	0.866418528	0.854425145	0.760480148	0.913080948	0.96540474	0.982271468	1.084257975
A1ZBU8_Bbd	0.917044268	0.676921882	0.593655385	0.663990896	1.335097377	1.746597019	0.837789947	2.734207155	1.469976269	0.786061554	1.308884525	0.887995758	1.092782175	1.424251024	0.988467373	1.802361221	0.629033839	1.048382332	0.662526687	0.840020954	0.978421955	0.696859265	0.45263557	0.819673894	1.089990775	0.591367171	0.895011376	1.41438782	1.077693169	0.579997002	0.966159217	1.03612171	0.54794165	0.810163915	0.621568971	1.156719953	1.274121759	0.881168598	1.06584248	0.909096922	0.812870201	0.918606161	0.55109335	0.658412654	1.097870708	1.489825889	0.705128279	2.072524176	0.953292132
Q9VUE8_bbg	0.923919147	0.949887704	0.931148231	0.943500842	1.011370017	0.897880404	0.939953811	0.949191686	0.799076212	1.189376443	1.445727483	0.866050808	0.864990073	0.837855725	0.880344143	0.931303772	0.914228987	0.78209361	0.920372888	0.7694698	0.744804816	1.064134188	1.094967933	0.99827331	0.922792304	0.955846078	0.993069528	0.988486474	1.107869439	1.017773307	0.802348337	1.011741683	0.878669276	1.052837573	0.968473746	1.014059005	0.96629034	0.839493024	0.968207477	1.006922995	0.852646714	0.865580448	0.716904277	0.739307536	1.542199488	1.810741688	1.001278772	1.066496164	0.962198488
Q9VAY6_BCAS2	1.017766087	1.009429381	1.144759207	1.072885471	1.011371914	0.9	1.103387593	0.807156475	0.962897786	0.913037102	0.897785599	0.993400792	1.203271707	0.990610783	0.958474494	0.985480592	0.900300068	1.084290115	0.963875665	1.102212265	1.111173341	1	1	1	1	1	1.121900161	1.038888889	1.240982287	1.127938808	0.90182977	0.955797697	1.06692023	0.966694079	1.178185201	0.971161673	0.86542114	0.95189736	0.990464747	1.044420326	0.955695957	1.191885965	0.964108187	0.996929825	0.968462457	0.797007797	0.85467444	0.897028868	0.904967386
Q9VDT4_BcDNA:AT09463	0.993935777	0.823153718	0.785139429	0.871635243	0.971436866	1.085302324	0.884166063	1.03577118	1.135819455	1.069587256	1.167728699	1.05957036	0.873718881	1.217233702	1.035788544	1.092976613	0.963493845	1.090823542	0.931008523	1.032291023	1.082139112	1.013547014	0.894528609	0.956128709	1.062626768	0.965518968	1.091314068	1.077933522	1.224613678	0.876980566	0.957979181	1.049660968	0.852234744	1.062482093	0.922501351	1.109643436	1.125877904	1.001755808	1.03919503	1.07371691	0.942058347	0.883705984	0.893041978	0.966512194	0.926052571	1.004765109	0.905701585	1.064549576	1.045419295
Q9VPP7_BcDNA:AT13539	1.105118058	0.929921295	1.040152964	1.030903998	1.07514785	1.0828405	1.266238401	0.990149893	1.397430407	0.946181299	1.117630264	1.213990007	1.189145753	1.058103597	0.928915812	1.039003585	1.104153789	0.808058853	0.931115198	1.173883966	1.159337903	1.177192982	1.234736842	1.146666667	1.125964912	0.998947368	1.029308697	0.999362854	1.310927047	0.986619943	0.869175627	1.043309438	0.785244922	0.974014337	1.213010826	1.195357456	1.001170389	0.916317175	1.074124646	1.177509022	1.03491661	1.142400982	0.972735646	0.975437519	0.989349261	0.919889734	0.836897502	0.954264472	0.983137778
A1Z8I8_BcDNA:AT13707	0.915000417	1.445701075	1.608056319	1.732629343	0.933225027	0.948387903	1.668445606	0.846874417	0.925956335	1.512968837	0.842694533	0.907482739	0.886188865	0.929364391	0.917703644	1.127233578	1.380442381	1.078901157	1.290707464	1.010127252	0.976906978	0.902964446	1.558192737	1.362310552	0.817033648	1.294824135	1.237448476	1.236772755	0.935738901	1.857118724	1.231526294	0.957036636	1.420224415	1.386589158	1.745639191	0.899260701	1.060248888	1.187534531	0.826777868	0.992343919	1.269594044	0.885703415	1.545365024	1.322120765	1.088003206	1.060754577	1.351519635	0.824579249	1.337316689
Q9VZ39_BcDNA:GH01560	0.583790524	1.22078138	0.942394015	0.853366584	0.593433084	0.801911887	1	1	1	1	1	1	0.592393392	0.674913561	0.921321552	0.755282367	1.141452171	0.838130915	1.122634069	0.849369085	0.827287066	0.77374359	0.942974359	1.172717949	0.873230769	1.225230769	0.920116497	0.967339297	0.920740587	0.943623882	1	1	1	1	0.75	0.49538835	0.453398058	1.17038835	0.525728155	0.527427184	1.245631068	0.295212766	1.440425532	1.310106383	0.469963492	0.727735369	1.307556146	0.879079544	0.757205353
Q9VZZ7_BcDNA:GH02340	0.915928	0.159497526	0.196911197	0.404861602	0.651204524	0.532057208	0.26945841	0.4643289	1.922739133	0.676828104	1.177432699	0.520460765	0.936271907	1.245884227	0.433351036	0.643653744	0.533191715	0.372955289	0.283533261	0.396219557	0.431237126	0.279769884	0.118465147	5.729948615	0.54317471	0.270442359	2.950800442	0.429892354	0.774220259	0.29961358	0.154958211	0.40699119	0.156878247	0.509430766	0.237629221	3.275120606	1.075120606	0.153824948	0.567057202	2.093039283	0.261199173	0.237161531	0.248832866	0.199112979	0.388271981	0.407210222	0.151353818	0.295710374	0.368184092
E1JJ55_BcDNA:GH02439	1.091031474	1.024968801	0.971766879	0.986252911	1.124413611	1.141289416	1.001391145	1.064342939	1.143240283	1.108747772	1.178107713	1.076933955	0.98326596	1.095422781	1.056559995	1.084020736	0.914273218	1.134211643	1.012783648	1.131578117	1.058188302	1.018796849	1.03931489	0.941766034	1.098789155	1.066531349	1.044961675	1.142325558	0.969647115	1.0446828	1.021751847	1.063766859	1.03151208	1.020299314	1.036059469	1.110958678	1.107781905	1.047721383	1.102814529	0.909134452	0.936834075	1.039593295	0.997987803	1.043755235	1.064726406	1.141019514	1.035960043	1.104752006	1.104324396
A1ZB93_BcDNA:GH04922	1.069011657	0.947317095	0.972732496	0.983867798	1.036535583	1.136413117	1.054644907	1.057030129	1.081097561	1.170068149	1.057926829	1.082478479	1.024474506	1.01714142	1.084343728	1.178535501	1.046989993	1.076699044	0.895467641	1.111789802	1.057036256	1.055287412	1.113265439	1.019577762	1.096165874	1.077012946	1.134864875	1.155172082	1.234678164	1.014330536	0.996158405	1.065327557	0.962810086	1.086640239	1.13310915	1.01434561	0.921654218	1.018915511	1.022838728	1.003578319	0.993091258	1.047777628	0.936357939	0.970200425	1.001919026	1.131628832	1.001369062	1.058799438	1.076236491
A0A0B4LEW1_BcDNA:GH05582	1.032824167	0.856320328	0.911859817	0.968122305	1.03353402	0.927673783	0.942440261	1.037126341	1.078054963	0.897616619	1.081424464	1.060156419	1.125062548	1.041698636	0.986623078	1.021449778	1.013476999	0.947775453	0.892366482	1.111181876	1.021654081	1.080131232	0.968567215	0.87059038	1.027621746	0.925833872	1.055560765	0.944037398	1.214018779	0.872751383	0.882457117	1.048879219	0.927642564	1.00389617	0.967447257	1.031699251	1.034859841	0.884671805	1.08412237	1.125823487	0.894353613	1.007221388	0.846200657	0.846728062	1.050115459	1.027772577	0.822068277	1.074268239	0.945813723
Q9W308_BcDNA:GH05731	0.645912574	0.663827793	0.503390111	0.596328758	0.840912849	1.404746155	0.489203201	1.890823979	0.727286455	0.842150299	1.007952887	0.547490814	0.527243185	0.819028706	0.865715833	1.453439249	0.720563279	0.931289338	0.558792676	0.7118539	0.676711806	0.666831744	0.588584871	0.703726631	0.68738393	0.702179027	0.990506484	1.193931979	0.934377294	0.611304135	0.84674287	0.640938853	0.645599822	0.772167351	0.474940226	0.718996707	0.769747823	0.901520278	0.567104254	0.682726576	0.764514819	0.555654233	0.721580817	0.724874186	0.695476541	1.245992005	0.663665054	1.707847675	1.017693861
Q9VT61_BcDNA:GH07921	1.088352294	1.00862919	1.145918758	1.034328625	1.095834552	0.828452073	1.179051947	0.803278379	0.945588441	0.89332416	0.887124274	1.235232741	1.23389277	0.905950902	0.867393458	0.862515532	1.069949122	0.891764865	0.862772323	1.077718934	0.981587064	1.246994036	1.22233101	0.919830652	1.105227106	1.068536356	0.904651885	0.865962794	1.158627957	0.993820969	0.833973727	1.002695689	0.999463544	0.922985107	1.151930199	0.940898361	0.915159453	0.826979781	1.099111907	1.120583667	0.889986573	1.143588348	0.892676664	0.91484611	1.065667017	0.832229517	0.889398634	0.766512605	0.854436292
Q9VIH9_BcDNA:GH07967	0.777255743	1.203106836	1.009147523	0.872370606	0.774723222	0.756061445	0.778017984	0.846844942	0.836505624	0.671186202	0.820628505	0.754135727	0.8517024	0.940237509	0.927417839	0.826744208	1.029092054	0.773897574	0.897878887	0.927784411	0.939527858	0.741144948	0.79163508	1.004149784	0.768533525	1.093543328	0.759658752	0.830295559	0.899406142	0.903231487	0.957563651	0.874909702	1.029986289	0.785253055	0.710322559	0.779763055	0.79187748	0.99179107	0.742203222	0.620797471	1.073476743	0.671846125	1.217858897	1.227625208	0.819499596	0.771922568	1.039754761	1.009807706	0.70346932
Q9VET1_BcDNA:GH08773	0.968214982	0.934768475	0.982807195	1.05569602	0.956078885	0.82915553	0.681637294	0.836270608	0.583854463	0.833996589	0.809550881	0.926094372	1.091664103	1.079975392	0.993232851	1.306982467	1.000615195	1	1	1	1	1.203892944	1.027250608	0.972749392	1.289051095	1.119221411	0.964131107	0.980210266	1.040816327	0.926406926	1.500211954	1.11657482	1.164052565	1.111911827	1.050275009	1.026383637	1.111636301	0.981179099	1.120831901	1.014781712	1.003437607	1.291677852	0.99557047	0.973020134	1.056027938	0.987093835	1.066049195	0.840419071	1.308973173
Q9VJG4_BcDNA:GH16758	1.053283022	0.960656604	1.048211882	1.034416458	1.105580658	1.160546049	1.095153717	1.205723399	1.080180739	1.110038097	1.052626916	1.093027377	1.024776292	0.980034639	1.116256134	1.051525065	0.960839026	1.099088921	0.966217201	0.925072886	1.08021137	1.109951547	1.059349718	0.975948784	1.0790818	1.021288724	1.161064286	1.210064336	1.305944841	0.952820308	0.970745094	1.051726816	0.942577538	0.993683011	1.038871112	0.982374233	1.066516288	0.992393642	1.110816765	1.075958663	1.013927504	1.109042971	1.090021658	1.044916664	1.108914989	1.150437212	1.0342526	1.229031924	1.123629513
Q9W310_BcDNA:GH18955	0.863660477	0.732979664	0.734571176	0.822988506	0.744827586	1.881343943	1	1	1	1	1	1	0.750259067	0.972020725	1.065284974	1.766839378	0.850777202	0.912576687	0.871165644	1.088957055	0.834355828	0.629769392	0.822641509	1.105660377	0.782809224	0.747169811	1.384553822	1.145658263	1.056822729	0.760704282	0.617123288	0.760958904	0.57283105	0.765525114	0.645351823	1.072675912	0.847457627	0.768361582	0.735233693	0.811504879	0.648176682	0.879341051	0.74220837	0.768032057	0.862348909	1.152985748	0.84484936	2.133862529	0.905165114
A1Z7T9_BcDNA:GH21254	1.268181818	0.924025974	1.012337662	1.038961039	1.050649351	0.985714286	1.047159404	1.190292333	1.215388858	0.967733039	1.056811914	1.289851076	1.576724542	1.152041295	1.01877053	1.206475833	1.160957297	0.653474903	0.872586873	1.192084942	1.019305019	0.851923077	0.946153846	0.828846154	1.607692308	1.161538462	1.196850394	1.031496063	1.155905512	0.696062992	1.018640351	0.859649123	0.776315789	0.817982456	1.08302583	1.052275523	1.223247232	1.09901599	1.102091021	1.141451415	1.064575646	0.960461285	0.957166392	0.637561779	1.235984355	1.164928292	0.678617992	1.134289439	1.075383589
A0A0B4KF65_BcDNA:GH22993	1.074267363	0.887274187	1.072501004	1.020152549	0.914090727	0.928301887	1.265909691	0.996303142	1.00211249	0.932664378	0.86400845	1.323475046	1.292313819	1.035444046	0.954599761	1.152927121	1.079251294	0.921556122	0.766794218	0.919217687	0.881377551	1.314001172	1.008787346	0.958406561	1.124780316	1.018160516	0.898970134	0.920597322	0.995365602	0.925643666	0.945007236	0.980028944	0.791895803	0.879305355	1.014929875	0.950233751	0.989895943	0.860805308	1.006183079	1.000150807	0.870607751	1.101345114	0.833377291	0.866279836	0.934180379	0.936054989	0.865965424	0.86273693	1.088989442
Q9VVJ1_BcDNA:GH27361	1.054981203	0.737781955	0.851973684	0.829417293	1.075657895	0.996240602	1.185827365	1.115718055	1.072370901	1.013569544	1.392385978	1.056916698	1	1	1	1	1	0.96742671	0.856677524	1.289087948	1.084690554	1	1	1	1	1	0.984589754	1.032486464	1.147438567	0.887130362	0.92086039	0.992288961	0.785308442	0.862824675	0.902592593	0.957407407	1.034814815	0.964074074	1.067407407	1.082222222	0.955185185	1.00983258	0.908583577	0.951368589	1.532110092	1.4508519	0.817824377	1.081258191	1.649667406
Q9VY55_BcDNA:GM24986	0.83849353	1.262939002	1.176987061	1.116913124	0.806492606	0.856746765	0.993666591	0.8443791	0.753675639	0.8807962	0.767699615	0.824700294	0.878865042	0.818843216	1.438704984	1.030556566	1.39687159	1.201771654	1.19242126	1.013779528	1.064468504	0.8990645	0.963318562	1.321024126	0.815361891	1.011570655	1.100725222	1.195004029	1.07735697	1.095084609	1.16504126	0.735933983	1.114403601	0.889722431	1.135174243	0.890510069	0.803207524	1.18762812	0.901724346	0.90883878	1.094055227	1.03044641	0.963793458	0.953507509	0.849986748	0.797243573	1.223297111	1.008613835	0.805555556
Q9W0P4_BcDNA:LD06317	0.965537214	0.952215465	1.102229945	0.954821894	1.070952795	0.968143643	1.226572723	0.857473578	0.975842979	0.863512833	0.873880221	1.153095118	1.37751004	0.895046854	0.969210174	0.817402945	0.890227577	0.899738611	0.866131441	1.007841673	1.054331591	1.161239079	1.095313741	1.073338629	1.092401377	1.097961345	1.02654727	1.08162295	1.164355337	1.075204057	0.928457176	0.938199796	1.000872473	0.787698124	1.106534871	0.934415941	0.898015219	0.876441516	1.004079391	1.151172825	0.888993489	1.02035945	1.062061219	0.942712721	1.063820795	0.93660186	0.934488588	1.04649197	0.990276035
Q95RS6_BcDNA:LD13269	0.896494013	1.056730781	1.126456726	0.904874417	0.917475788	0.817280122	1.028694674	1.040197549	0.930315912	0.929399016	0.948237059	1.093127449	1.122626785	0.908332751	0.898478813	0.947468959	0.952547348	0.8083762	0.951456114	0.823322127	0.76785208	0.996560871	1.017568883	1.005318653	0.837187912	0.995481145	0.879228134	0.865547406	0.909297479	0.908638167	0.9773492	0.991563398	0.957784161	1.003446861	1.067040468	0.844295466	0.855265724	1.03920039	0.870014627	0.925975134	0.944197952	0.987386354	1.060288284	0.939058775	0.840035652	0.835037313	0.933544802	0.899666195	0.751163111
M9PCH3_BcDNA:LD21794	1.117805479	0.813019391	1.001923669	1.015235457	1.096337335	1.021314251	1.321153846	1.015705128	1.217307692	1.219230769	1.012179487	1.281410256	1.334446131	1.127162367	1.032473445	1.205159332	0.946889226	1	1	1	1	1.096008085	1.073370389	1.062051541	1.022233451	1.039717029	1.043967532	1.007502152	1.124769401	0.952465871	0.900420521	1.007401177	0.926324643	0.983683768	1.165504346	1.16990095	0.995805539	0.900343643	1.136597938	1.27385284	0.936476653	1.200937051	0.827741253	0.890916648	1.18787696	1.02774427	0.775482509	0.983790712	0.938953093
A0A0B4KHY8_BcDNA:LD22087	1.228669675	1.081452826	1.323017408	1.144852783	1.128949065	0.93058242	1.210121012	0.486248625	0.799779978	0.815181518	0.870187019	0.713971397	1.046237183	0.791255562	0.803637067	0.778680596	1.00561037	0.758791802	0.71995685	0.914563107	0.883063646	1.401481481	1.10962963	1.228888889	0.908888889	0.954074074	0.997163866	0.993697479	1.241701681	0.948634454	1.046678636	0.987432675	0.965888689	0.956912029	1.170198105	1.241171404	0.972265289	0.884582257	1.079931094	2.014814815	0.798277347	1.080355902	0.815515084	0.887668567	0.887102537	0.915326902	1.010718114	0.744551626	1.018366976
Q9VMB3_BcDNA:LD22339	0.849192335	0.917586129	1.022659667	1.077614098	0.85475059	1.01368824	0.986010937	0.859449394	0.732864281	1.000141423	0.727136661	0.740300759	0.814123614	0.755221034	1.000812823	1.027213317	1.027657661	0.922779029	0.90031054	0.705181757	0.696912866	0.817836382	1.133021409	1.091053452	0.799617184	1.153225578	0.87567847	0.934430731	0.740194495	1.137503231	0.901629695	0.755840047	0.980318581	0.991538829	0.977814216	0.670140532	0.684193729	1.011654139	0.705653193	0.736510801	1.103896818	0.85127192	0.971214447	0.94700062	0.935083489	0.969404665	0.973610524	0.906728231	0.933883218
Q8I937_BcDNA:LD24586	0.979426096	0.992014077	1.065917704	1.113190309	1.044802382	1.068523281	1.326789409	1.007852709	1.110362392	1.064731788	1.166710882	1.175306415	1.00332134	1.079020205	1.013250761	1.094312206	1.210732079	0.931895613	1.053738892	0.914860735	0.983878332	1.022888867	1.309827603	1.080744132	1.125645271	1.144053764	1.09631231	1.073252499	1.249396873	1.151361343	0.988547066	1.003176726	0.98403277	1.005893663	1.259930226	0.925181791	1.055062839	0.980643941	1.051721239	1.133748056	1.027993779	0.989199355	0.971735626	0.948414831	1.196856151	1.025680863	1.004660939	0.992825809	1.06853956
Q9VNX9_BcDNA:LD29166	1.296968802	1.052307844	1.220106289	1.137978545	1.18216711	0.933667946	1.143072888	0.739686829	1.058024004	0.943724664	0.96168826	1.115412129	1.153048606	0.964710359	0.926091506	0.998858556	1.009512033	0.927971921	0.841370365	1.162978788	1.064932092	1.191294387	1.234593356	0.92233677	1.068957617	1.071134021	0.99806027	0.96972636	1.211291999	1.066989955	0.775855489	1.093626765	0.963999491	1.021752958	1.236201757	1.062082024	0.966118766	0.885665942	1.14060108	1.079647087	0.920352913	1.167919161	0.924595593	0.962297796	1.137338001	0.931330999	0.992690867	0.876481789	0.969268593
Q9VYV6_BcDNA:LP01642	0.923950425	1.447926806	1.668386218	1.020569723	1.101940173	0.460255662	1.296669741	0.707242597	0.972422787	0.659562963	0.757530456	1.532046185	0.956078252	0.850726954	0.849128416	0.815559108	1.249067519	0.584678104	0.891625616	0.928826227	0.764226261	1.259225173	1.386273994	1.066438776	0.907835919	1.390744149	0.68378904	0.563207871	1.107825192	0.978492163	1	1	1	1	1.319712055	0.787622663	0.749623952	0.868777308	1.020807965	1.175703746	0.924969558	1.147877013	1.475353831	1.154576512	0.982058173	0.454157445	0.809516282	0.560306671	0.585780819
Q9W5E7_BcDNA:LP07417	1.012256669	0.916222062	1.180245133	1.008219178	1.13482336	0.966979092	1.257272239	1.095018804	1.038145675	0.995778648	1.0330033	1.359889477	1.663200462	0.894473329	0.773156172	0.880608511	1.062006547	1.002435985	0.85140494	1.151144346	1.044867437	1.72085084	1.523634454	0.810530462	1.134978992	0.904805672	1.02606788	1.051103368	1.192411924	1.050200026	0.906532943	1.028276919	1.066165204	1.055300181	1.181665547	0.977249832	0.946272666	0.870382807	1.049613835	1.080842848	0.887256548	1.843139315	0.829165791	0.953561673	0.966853207	0.809298321	0.796383986	0.993327594	0.819732727
A0A0B4LHA6_BcDNA:LP11469	0.906841437	0.967765666	1.405671103	1.031164315	0.964555608	1.050424664	0.964727231	1.137008053	0.806169899	0.988431439	1.091074061	1.039582624	0.908289013	0.747178622	0.854844986	0.916201842	1.001037748	1.048989511	0.992069583	1.033128677	0.968022512	1.152633465	1.002508062	1.202078108	0.931207453	1.054102472	1.065045863	1.132310879	1.122793175	1.045714568	1.023492667	1.003938077	1.134030418	1.163905486	1.257209406	0.831965395	0.917147294	0.940161934	0.943045697	1.082076309	1.002495563	1.161326142	1.073604061	0.996827411	1.055122784	1.100378366	0.987758736	1.127976853	1.002708266
Q8IQC6_BcDNA:RE03722	1.010687464	0.928254011	0.977114163	0.963827045	1.091498911	1.047749189	0.92023856	0.92564517	1.157850733	0.946825706	1.107630567	1.041079093	1.032769796	1.002946109	0.933010017	1.058650229	0.979467887	0.958152402	0.917950693	1.129149741	0.975346687	1.068822493	1.064124211	0.941179709	1.032943033	0.936261195	0.923437706	1.010899723	1.253732329	0.910225922	0.898244173	1.010370675	0.929766917	1.027466886	0.958719377	1.270928814	0.973655577	0.828579907	0.97428204	1.094859705	0.838537373	1.041320623	0.875134296	0.884121489	1.032346995	1.172027201	1.037125528	1.13692336	0.904250008
Q9V9U9_BcDNA:RE07994	0.885450871	0.955923213	1.04584491	1.041298308	0.967542309	0.969184137	1.221560998	0.890592813	1.135500114	1.030670634	1.128404669	0.967498283	0.920846175	1.19851499	1.048052676	1.170636033	1.158027459	1.055547326	0.948452081	1.110502148	1.03510591	1.062833939	1.115622996	1.108356486	1.128446249	1.151528104	1.056106634	1.090735984	1.186874502	1.11876716	0.997895721	1.007014262	0.904138415	1.0614917	1.160056801	1.033573385	0.996247084	0.894816919	1.071203976	1.07982554	0.96926666	0.967009194	0.908869659	0.965657112	1.12668953	1.114081097	1.009380674	0.935949163	0.86623826
Q8SXK0_BcDNA:RE18748	1.025608732	0.973971453	1.305625525	1.019731318	1.074307305	1.050377834	0.888007055	1.115226337	1.033215755	0.951205173	0.915343915	1.166666667	1	1	1	1	1	1	1	1	1	1.294311624	1.139049189	1.134377576	0.999725199	0.938169827	1	1	1	1	0.85890375	1.050616313	0.9312877	0.956726987	0.965106136	0.953329456	0.896045362	0.935010177	0.853300378	1.024861878	0.920325676	0.87281399	1.322734499	1.283518813	0.898956975	0.933507171	0.983702738	0.778357236	1.085864486
A0A0B4KI23_BcDNA:RE21592	1.001957455	1.039039039	1.004473059	1.163435687	1.100152509	1.094932629	1.054990116	1.414503681	0.908912867	1.196220156	0.910657127	0.971822538	0.948911466	0.875523533	1.186201534	1.228322621	1.128384823	1.172051958	0.977543568	1.009300606	0.907733555	0.962493336	1.099237174	1.137283274	1.003071612	1.20242175	1.158255149	1.310934973	1.215388763	1.065652971	1.045363891	0.908808005	1.051570586	1.157084401	1.05596151	0.953082243	1.002864231	1.052556007	1.051465945	1.059742896	1.055916404	0.904733382	1.04621315	1.073258976	1.032247139	1.244513753	1.091766748	1.350654116	1.081281631
Q8SWS3_BcDNA:RE26528	0.993907746	0.846533217	1.109007833	0.999782419	1.110966057	0.959022338	1.320256702	0.975468378	1.022461443	0.974950833	0.892971742	1.002380706	1.012917202	0.768533376	0.96309371	0.980744544	0.956755456	1.077280724	0.934656949	0.823825082	0.844684594	0.868632708	1.239824519	0.485010968	0.955276627	0.955398489	1	1	1	1	0.994281229	0.821260372	0.967705764	0.929917022	0.954916676	0.865522569	0.903321929	0.996192473	0.824577861	0.9407902	0.953813045	0.9711162	0.754081407	0.953534757	1.097286074	0.999036037	0.921844876	1.186637995	1.110591549
Q9VZZ6_BcDNA:RE30174	0.848599645	0.81072501	0.722653597	0.75609357	0.822760782	0.936261956	0.737546322	1.041917259	0.886975275	0.782394751	0.850236924	0.756545775	0.827648042	0.923034601	1.034213637	1.03769817	0.864001304	0.947828344	1.009387437	0.724909154	0.861048624	0.885588994	0.818116801	1.040577419	0.92853782	0.877703122	1.063782654	0.946854754	1.170449321	0.838808777	1.0147711	0.784195272	0.980375039	0.854454028	0.76618705	0.895785499	0.905326802	0.927623858	0.880197969	0.880159702	0.901665901	0.803128148	0.906114258	0.865005698	0.934398412	1.034097458	0.91826215	1.078760325	0.901529303
Q9VCD9_BcDNA:RE30346	1.055893562	0.981747627	0.993098191	1.043212529	1.110193334	0.943967847	0.920709829	0.995316118	0.992382063	1.038107358	0.986938155	0.996093819	1.07535213	0.994715068	1.032235694	1.004615348	1.037209747	1.049003085	0.965497504	1.05820375	1.12878812	1.000525462	0.995659226	0.938737977	1.1150305	1.041385849	0.982748614	0.964716713	1.205335521	0.957812156	0.9309862	0.986936313	0.978448525	0.990905941	0.987091169	1.038105877	1.074122344	1.006330292	1.082831668	1.130515733	1.010219492	1.055126599	0.98845459	0.972808193	1.052678212	0.925547053	1.047630554	0.830294894	1.019416959
Q0E8X8_BcDNA:RE33866	1.081076006	0.962237906	0.894896258	1.038132447	1.041022244	0.909699945	1.018520092	0.997780884	0.905714609	0.855686677	0.767346818	0.974320557	1.200498495	0.891402628	0.959543891	0.908986313	1.030493377	0.879101564	0.927143508	1.052504429	1.083167963	1.135339363	0.832925108	0.729851357	1.293081136	0.818219871	0.885674996	0.885565609	0.749521711	1.127828713	0.843293624	0.963131538	1.007458465	0.873270828	0.908077296	0.935359516	0.898244493	0.856186042	1.014567389	0.957914522	0.850741391	1.173047626	0.862833458	0.909859445	0.97400678	0.846194842	0.918995114	0.9314655	0.858675095
Q9VK90_BcDNA:RE36920	1.146797246	0.818109528	0.90846883	0.879255865	1.058718898	0.963232678	0.946241881	1.021976492	0.960516548	0.927080111	0.955613981	1.070615527	1.010320091	0.958006461	0.96459286	0.987414524	1.037588623	0.859225564	0.891807179	0.99776574	0.961310337	1.050962026	0.975303575	0.904087101	1.069478309	0.940781691	0.929349384	0.924238082	1.147666476	0.878821534	0.858860549	1.006856149	0.894062268	0.994090409	0.911433679	1.039568436	1.004016014	0.83490281	1.077865344	1.070764931	0.846182899	1.050253363	0.789799861	0.812365572	1.133745877	0.954873172	0.89953005	1.06631834	0.943140771
Q8SYQ8_BcDNA:RE40412	1.021772354	1.222331204	1.355360401	1.150182482	1.07243385	0.80620438	1.239495032	0.814803437	1.027840445	0.968233092	0.946767148	1.268602698	1.272840137	0.957581733	0.869349303	0.861668979	1.19614645	0.896643643	0.899615464	1.179507038	1.086750178	1.180588469	1.185864282	0.994940409	1.059288025	1.201890644	0.899910364	0.843795313	1.098310089	1.098296908	0.898608922	0.993668197	1.101349962	0.970396766	1.255368164	0.909945425	0.88161088	0.946090449	1.01967403	1.125916253	1.012491838	1.165841469	1.153595431	1.083347561	0.955226532	0.784261179	1.016893693	0.792552561	0.856761464
Q9VWT7_BcDNA:RE41194	0.860349643	0.638977966	0.85807386	0.916002896	1.035791869	1.064652943	0.973291438	1.262896046	0.919350615	0.701492537	1.147420791	0.853626604	1.053656698	0.840914803	0.712239256	1.144131691	0.845312893	0.829526917	0.54812398	0.76182708	0.569331158	0.86877916	0.825427683	0.810069984	0.855171073	0.822317263	1.065519156	0.982232093	1.233481399	0.86285397	0.897663329	0.962708631	0.856747735	1.032331903	0.824121753	0.947133539	0.767479117	0.623870008	0.631536789	0.695731777	0.430827326	0.617188932	0.651090343	0.604727872	0.648388987	0.806678383	0.544815466	1.311540715	0.757540149
Q8MYY7_BcDNA:RE44624	1.204763652	0.909160399	0.940836544	0.97223751	1.251421757	0.952577509	0.99403863	1.092440982	1.201547307	1.048432822	1.111861802	1.30607	0.960307993	0.939214836	0.91719987	1.049289665	1.088981672	0.960500166	0.859721762	2.07630838	1.986460749	2.28779363	0.910001441	0.886871307	2.119253495	0.887087477	0.975447389	0.952869112	1.475510669	0.88384337	0.879151682	1.361328538	0.935001058	1.039454199	0.951136172	1.332469281	1.315384615	0.897643494	1.390607642	1.430735566	0.911530045	1.160563961	0.860022123	0.875977277	1.333109078	1.02009329	0.901955508	0.985423394	1.036861337
Q9VRT7_BcDNA:RE60135	1.066410522	1.068804492	1.105452933	1.090409339	1.110093099	0.86844983	1.199553903	0.912565056	1.02929368	1.084907063	1.066171004	1.358066914	1.167978	0.802994424	0.845084409	0.847299672	1.093346574	1.021434821	0.941819773	1.065835521	0.985345582	1.26415326	1.144786934	1.070244382	1.162962053	1.089770355	1.08215533	0.989190088	1.381673042	1.153999667	0.928159605	0.944083463	0.962295232	0.910863	1.099199137	1.020135181	0.966034306	0.91440418	1.059809156	1.147478132	0.965097126	1.053573018	0.97988787	1.001601851	1.116227958	0.881472016	0.953181702	0.868949655	0.951565352
Q9VV29_BcDNA:RE63063	1.26289495	0.938563327	1.1289495	1.157304888	1.469889279	0.872400756	1.222290489	0.856107152	1.122020152	0.874170558	0.974686655	1.698820349	1.806451613	1.022451613	0.868774194	0.747096774	0.915741935	0.778382685	0.772672952	1.390651972	1.169698579	1.784819639	1.315255511	0.609844689	1.315255511	1.067259519	0.880581408	0.871170135	1.184042664	0.990170449	0.769663712	0.920219502	1.066131983	0.878851836	1.387869362	1.010108865	1.044167963	0.872472784	1.297978227	1.340279938	0.834836703	1.633817479	0.733703465	0.815049819	1.185135876	0.663246926	0.767170491	0.679066489	0.741135774
Q8SYG3_BcDNA:RE63412	1.095112689	1.034082897	1.049569716	1.059398707	1.086634441	0.928835388	1.058717572	0.91436776	1.049665525	1.032357644	1.009260891	1.135754609	1.138255305	0.998053217	0.93484675	0.938147524	1.075325025	0.94170623	0.953101944	1.078214217	1.084822288	1.126815516	1.118301372	1.037416999	1.152156001	1.083816663	1.00264029	0.950854784	1.230943573	0.99862923	0.918651842	1.028948522	1.021000326	1.030893413	1.093653859	1.112782539	1.050495443	0.995855938	1.09145081	1.22211978	1.030580654	1.08084767	1.005851452	1.010334585	1.155713889	0.929369853	1.006976959	0.876959378	0.994967649
M9NFF0_BcDNA:RE63764	0.701592454	1.141637083	0.895141495	0.824018663	0.644649559	1.05763262	0.869203135	1.074257022	0.772370999	0.872346506	0.836218158	0.658556499	0.500209019	0.652636254	1.439201547	0.97128599	1.220280086	1.000397362	1.264616281	0.68160746	0.704336539	0.611403404	0.805975479	1.091584335	0.768956077	1.115962385	0.952422253	1.163610457	0.887312601	0.92268616	1.328830828	0.732724544	1.068784746	0.89925381	0.77108545	0.811362587	0.779676674	1.301893764	0.665804465	0.71926097	1.151562741	0.632799301	1.14892708	1.128381396	0.763887003	1.16096247	1.176581104	1.451220064	0.764707336
A0A0B4K890_BcDNA:RE67445	1.060160994	1.038200819	0.893023584	1.018782658	1.004801582	1.090947606	0.865061999	1.134208607	0.991684902	1.006807683	0.914320447	0.90362266	0.922105638	1.022674729	1.155032901	1.099724346	1.042148319	1.12962719	0.987814517	1.104399947	1.0516401	0.922218087	0.915829302	0.927676467	1.02623744	0.994727701	1.119154746	1.154404692	1.254848419	0.978279083	0.99553239	1.020143434	0.990085041	1.055296469	0.99453767	1.108262389	1.08907042	1.035136066	1.037399734	1.096353526	0.996899759	0.893013899	0.965069495	0.993306511	1.08528655	1.20102924	1.043883041	1.155368421	1.19673457
Q8SYC3_BcDNA:RE68569	1.096392569	1.11538782	1.093726568	1.292260268	1.109639257	0.768724486	0.962998456	0.850077197	0.88580099	0.852739179	0.84682958	0.902305276	1.108333333	1.007291667	0.848958333	1.080208333	1.032291667	1.23145072	1.204872647	1.289036545	1.159468439	0.947085684	0.909213	0.822992211	1.053988719	0.908407198	0.976835664	0.896853147	1.204545455	1.073863636	0.692579505	1.028268551	1.088339223	1.081272085	1.165488348	1.046347211	0.956925897	0.920921707	1.281356376	1.217989002	0.984681854	1.043888705	0.891851606	0.962073534	0.724637681	0.757971014	0.717391304	0.855072464	0.851410506
A1ZBU6_BcDNA:RE70748	1.011726044	0.697512884	0.760026888	0.864291583	1.046754799	1.117111061	0.748646372	1.282757791	0.83106726	0.678137408	0.974491638	0.917819757	1.164794007	1.180310326	1.098448368	1.27340824	0.862493312	0.948003714	0.682451253	0.755803157	1.00185701	0.942321386	0.73273202	0.77142179	0.924044624	0.839188227	0.972838027	1.005791891	1.134311963	0.83143599	0.886807182	1.007806401	0.948477752	1.214285714	0.943136576	1.071490393	1.102648433	0.86117362	0.942876926	1.194564653	0.783884369	0.979844413	0.751768034	0.737270156	1.285045045	1.303783784	0.875675676	1.34954955	0.721571112
Q9VGW5_BcDNA:RE74890	0.910116875	0.864873916	0.848431064	1.014534008	0.947824922	0.82646261	1.125118483	0.982464455	1.040555179	0.961814489	1.031211916	1.061611374	0.999147038	0.916868972	0.835575093	0.828685782	0.935962207	0.981003304	0.893453312	1.047796035	0.994566162	1.016830359	1.05390326	0.912389911	1.023147508	1.001152764	0.875762328	0.915525353	0.493326363	1.00724865	1.003244905	0.982124559	1.038483434	1.032221337	0.994570942	0.905680253	0.94583097	0.868163034	0.992261567	1.021473138	0.875455798	0.97189811	0.935702547	0.90398521	1.067583047	0.861970218	0.789996182	0.868652157	0.854671767
Q8MMD0_BcDNA:RH04491	1.041591932	0.834512166	0.831703273	1.133743951	1.216860131	1.076855393	0.986100079	0.943606037	1.076499206	1.081264893	0.987291501	0.984412232	1.406779661	0.899011299	0.940324859	1.285663842	1.10240113	1.20256917	0.734189723	1.122529644	1.062252964	0.926406032	0.960749884	0.945359707	1.032897795	0.901100036	1.036398798	1.077217944	1.327623718	0.915875263	0.786509146	1.039939024	0.926219512	1.01554878	1.057205501	1.063434323	0.788220052	0.887681882	0.969852501	1.054315328	0.918078533	1.09760332	1.029090447	1.031631098	1.08173539	1.089149238	0.975195643	1.041233811	1.159979477
Q7K3Q2_BcDNA:RH05973	0.828268877	1.26611418	1.195211786	0.982965009	0.624309392	1.196593002	0.907937999	1.018318459	1.029356505	1.138093001	1.027712541	0.831845937	1.042260442	0.939066339	1.256511057	1.131695332	0.996068796	1.205679625	1.012131238	1.40970499	1.248138958	1.014782261	0.981622054	1.20854974	1.184578506	1.036755893	0.996205734	1.17643339	1.043001686	1.074831366	1.089876378	0.912462412	0.808553291	1.137320414	1.000899604	0.996581504	0.992623246	1.110471393	0.951601295	0.992263404	1.183699172	0.834234863	1.032455069	0.960390857	0.646396396	1.192567568	1.471846847	1.093468468	1.686127168
Q8MYV9_BcDNA:RH08259	0.300964806	1.901878833	1.829733214	0.950431624	0.296941526	0.333463537	1.038419654	0.480637714	0.412945942	0.373916452	0.450233044	0.377357669	0.609259874	0.604945237	1.06465317	0.604580153	1.502422834	0.480130751	1.461278246	0.418594044	0.359641954	0.454348434	1.172748881	1.452775447	0.448615772	1.792645414	0.441615712	0.508838243	0.381878822	1.218677043	1.459850543	0.425237772	2.015285326	0.468716033	0.791052307	0.281605651	0.272915849	1.374109996	0.264226047	0.322139373	1.62824466	0.625150566	1.59503734	1.508552156	0.354364395	0.341853609	1.485080529	0.715379638	0.351070514
Q9W4U2_BcDNA:RH09070	1.014526408	0.955331109	0.860454805	0.962395166	1.007620164	1.183214597	0.849414082	1.348750011	1.13395253	0.971964474	0.939438567	0.942383968	0.940402158	1.11535153	1.204851341	1.242907579	1.038728293	1.190791187	1.013807525	1.041739895	1.134413851	0.991823894	0.894894687	1.082884627	1.043698089	1.023482537	1.125982139	1.12247135	1.194779809	0.933808593	1.176148491	1.10059151	0.997056403	0.973458797	0.839536648	1.125300566	1.088921803	1.113579637	1.065388519	1.024319555	1.008703841	0.918570115	0.968220445	1.009473127	0.978716181	1.151119541	1.053416186	1.260283981	1.137235758
Q7JRC0_BcDNA:RH17411	0.564577817	1.616651956	1.27956752	1.243601059	0.575022065	0.854148279	0.96353167	0.984325016	0.644273832	0.999040307	0.763915547	0.75671785	0.86118175	0.918698579	1.177711294	1.086910995	1.110172027	0.993812214	1.293247242	0.478880818	0.551520043	0.853748412	1.020838628	1.2158831	0.85133418	1.257306226	1.05966712	1.166230504	0.831466555	1.252800167	1.399469584	0.677274988	1.325874358	0.910492292	1.086095134	0.526659363	0.526568064	1.341048115	0.530128732	0.543686661	1.329316169	0.605208022	1.331038611	1.401277063	0.601752988	0.636334661	1.543585657	1.181035857	0.863379519
M9PC24_BcDNA:RH19933	1.107846641	0.888649695	0.970698205	0.964771608	1.108430585	0.907022146	0.966576881	1.028003153	1.037271841	0.941502699	0.992778854	1.104134503	1.130067845	1.036552177	0.918967564	0.902638512	0.926596474	0.917113037	0.923398511	0.980403257	0.957119424	1.02349127	0.913068415	0.99102852	0.988148712	0.863495858	0.889524022	0.952174604	1.115758416	0.86264371	0.877457795	1.04510427	0.843743793	0.947423039	0.95770576	1.064791353	1.030381072	0.859808426	1.023194956	1.133412533	0.977461349	1.160877487	0.824611002	0.844039218	1.106595439	0.937584096	1.033220537	0.982147254	0.947762131
Q8INF8_BcDNA:RH31685	1.00038564	1.070221568	1.089678867	1.134448184	1.015951479	0.991480858	1.070960388	1.016433932	1.092808967	1.017003895	1.062790919	1.262372946	1.287355507	0.973406141	1.113821715	1.164669172	1.044110347	0.9270222	1.113804542	0.951092966	1.033171727	1.205693398	1.106889677	0.983938857	1.123726185	1.059481613	1.094233771	1.091281056	1.315602986	0.994558569	0.952987872	1.086571114	0.979184123	0.983814774	1.052542299	0.994476099	0.961419686	1.166282458	1.022878518	0.991561916	1.080335784	0.975075954	1.085180601	1.135141218	1.037857237	1.077027441	1.005777058	1.023195763	1.046220715
Q9VDL5_BcDNA:RH34302	1.118154663	0.982575506	0.999170262	0.982409559	1.124128775	1.117822768	1.036493998	0.916861355	1.024571014	1.076532667	1.014500926	1.233384355	1.219783819	0.973577902	1.105797576	1.145758271	1.146740911	1.041998408	0.883957006	1.134255573	1.105095541	1.066899176	1.052737265	0.975375185	1.023673642	0.952758402	1.034511366	1.088767214	1.251479454	1.095625242	0.977222222	0.934722222	0.926388889	0.939166667	0.974120622	1.123298877	1.045288912	0.909199078	1.046850599	0.992042835	1.014129546	1.158965517	1.004482759	0.99	0.911616621	0.954382772	0.979071884	0.844343342	1.160597869
Q7KVI9_BcDNA:RH38235	0.703778766	0.730685133	0.70591392	0.835633096	0.700501818	1.427573175	0.743221533	1.4399688	0.770841822	0.992287274	0.855641058	0.667601895	0.622197245	0.876263566	1.215944561	1.426920764	0.871366799	1.187078976	0.833117087	0.651214909	0.745812692	0.612780797	0.746887761	0.831531728	0.677295804	0.870910373	1.099437061	1.417992665	0.877241181	0.743070179	0.94759116	0.725584577	0.763638695	1.005155388	0.708670375	0.667679928	0.806073971	0.952752822	0.59890717	0.6299717	0.877942459	0.60594979	0.798788036	0.816902776	0.75	1.373707845	0.852758303	1.589945499	1.186211694
Q8IQB7_BcDNA:RH42907	0.972724809	0.820057148	0.742082853	0.78663798	0.91256127	1.045035125	0.778608158	1.120444836	1.043435098	0.890977234	1.136088833	0.904557674	0.946017836	1.018198476	0.90523197	1.068419769	0.85281622	0.972363094	0.853068407	1.055395178	1.027298813	0.905269312	0.773874584	0.80289774	0.999705142	0.838824636	0.932916532	1.04515872	1.202554883	0.812923363	0.875940416	1.045764226	0.807530863	1.064378814	0.77361372	1.011344767	0.97843767	0.839743046	0.971953215	0.90101812	0.856432943	0.95208988	0.799718513	0.834225255	1.053943494	1.032152934	0.864907158	1.18073165	0.930863709
Q9W257_BcDNA:RH44966	0.990335052	0.935654873	0.780166354	0.80684747	0.88303948	1.171333177	0.756909193	1.088302312	1.030141004	1.151810491	1.085662719	0.834765933	0.810335037	1.11284381	1.093230827	1.298067823	0.973237817	1.165419524	0.942761627	0.929654914	0.946354647	0.86238918	0.855962855	0.953030634	0.921942028	0.985280016	1.095908711	1.202226552	0.873643195	0.85271361	0.983059728	0.982481226	0.835858365	1.10346446	0.775461118	0.895351816	0.931985085	1.117328931	0.831350336	0.800964932	1.075999089	0.798393021	0.95644322	1.03275176	1.132660746	1.23624961	0.995559364	1.180611821	1.162612289
M9NEX3_BcDNA:RH45308	0.984203303	0.973328321	0.847094614	0.944296317	1.017990926	1.381052705	0.869068855	1.31897908	1.123509355	1.186182252	1.109543054	0.89483165	0.87766968	1.169338499	1.165877457	1.273565791	0.975457024	1.159490005	1.057505476	0.938491991	1.086665745	0.905206341	0.861984149	1.04302405	1.014696638	0.979242963	1.232151031	1.250917304	1.296711212	0.969955954	1.133920308	1.200094988	0.937137708	1.125858542	0.887673244	1.15012611	1.220402035	1.163538512	1.058331295	0.997840519	1.090234253	0.857246632	0.947963492	1.008659565	1.014985105	1.283988608	1.05846728	1.27997021	1.193569892
Q9VW17_BcDNA:RH51268	0.998729296	0.937868251	0.862232899	0.887014793	1.002535087	1.208363889	0.868741296	1.187608189	0.935418375	1.085776945	1.017258209	0.939407546	0.852521171	0.968894516	1.065359563	1.167131303	0.955860648	1.179021773	0.989926304	1.010185782	0.953729649	0.941183927	0.933178109	0.989872641	1.046180224	1.036232996	1.05301483	1.121089009	1.020594678	0.845884025	0.942801917	0.941243762	0.901770511	1.052609087	0.866737293	0.956435241	1.004102097	1.026220158	0.966136145	0.922799281	0.962249624	0.898409068	0.933372181	0.960364144	1.045229183	1.155742757	0.967741935	1.132721702	1.163213439
Q8SWZ6_BcDNA:RH51312	1.133759076	0.96710699	1.03166827	1.106552358	1.037179599	1.09369259	1.149851	1.01532567	1.032354193	0.947211579	0.974031503	1.111536824	0.991620112	1.132216015	1.005586592	1.270949721	0.968342644	1.027135466	0.895048041	1.05036427	1.060500475	1.013569419	1.011087208	1.085057091	0.98163164	1.025649512	0.936034115	0.985074627	1.10376688	0.950248756	0.969785575	1.046458739	1.007797271	1.029239766	1.023453094	1.012225549	0.97754491	0.928143713	1.10242016	1.115643713	0.919660679	1.333333333	0.808988764	0.916978777	1.274927826	1.187652676	0.893404397	1.13679769	1.056825499
A0A0B4K8A8_BcDNA:RH52355	0.417145844	1.304756926	1.474647151	1.034500784	0.395713539	1.02456874	1	1	1	1	1	1	1.337899543	1.023483366	0.829093281	0.908023483	0.757990868	1	1	1	1	0.87838934	1.13424102	1.100173812	0.952723059	1.110196987	0.910450738	1.14918229	1.267451137	0.961507778	1	1	1	1	1.074441687	0.593052109	0.649503722	1.117866005	0.736352357	0.717121588	1.163771712	0.808461978	1.080617496	1.111492281	0.73337766	1.009973404	0.890957447	1.301196809	0.677631579
Q9VGQ2_BcDNA:RH54117	1.022753919	0.876525251	0.891571497	0.929284815	1.008467584	1.154609406	0.956791604	1.196881559	1.088995502	1.047166417	1.248785607	1.140209895	1.018445587	1.033531362	1.066728968	1.175978462	0.936497341	1.071088884	0.817322738	1.055564078	0.883809407	1.106731607	0.973357417	1.003548044	1.001161178	0.933941877	1.132595918	1.207340214	1.124126441	0.907761374	0.925803203	1.000552253	0.886918104	0.97508365	0.981517892	1.04749085	1.027980278	1.008802444	1.070056566	1.082851871	0.96288454	1.07171843	0.865763992	0.891417895	1.004953099	1.261199264	0.962347681	1.159244324	1.02921431
Q9VMR9_BcDNA:RH62365	1.088081027	0.916729969	0.933405679	0.965599566	1.101284138	0.81045397	0.843408747	0.847040075	0.920763885	0.697633105	1.566748524	0.90663044	0.942696971	0.85360966	0.81276952	0.807823043	1.001369794	0.86992678	0.895404698	1.024550244	0.914786469	0.989583832	0.94272305	0.938125569	1.019419568	0.954288588	0.878531303	0.818773915	1.144529024	0.88168607	0.833858067	0.912312798	0.950136147	0.899208645	0.932517949	0.915633247	0.854961832	0.788586509	1.018842759	1.159822923	0.821930248	0.844454297	0.860710855	0.877964975	0.848588604	0.858494511	0.820230005	0.857736539	0.810997093
Q8SY67_BcDNA:RH62928	0.844025335	0.730795089	0.654647748	0.672092283	0.899331234	0.959909416	0.786765631	1.029406215	0.963328721	0.897974588	1.026009561	0.966851176	0.862441524	1.075462241	0.981788817	0.997438182	0.808253509	0.966286777	0.876448429	0.912259787	0.862142959	0.952981566	0.77229644	0.881632958	0.96260915	0.791029181	0.877424824	0.903705181	0.920111704	0.685583205	0.929745042	0.925835694	0.859943343	0.905042493	0.742041199	1.074496723	1.090941011	0.988764045	0.897354869	0.937734082	0.889805712	0.781370558	0.861573604	0.793451777	1.055170967	1.143643801	0.79940214	1.128435074	0.848176237
Q9W3Q8_BcDNA:RH67809	0.766389156	0.856628875	0.765134084	0.833577375	0.786763168	1.048403966	0.624025974	1.053733766	0.799188312	0.912175325	0.832305195	0.799675325	0.638906548	0.736808646	0.99682136	0.909408773	0.840750159	1	1	1	1	0.772636816	0.756965174	0.90920398	0.756716418	0.848507463	1.074747268	1.219442459	1.037067293	0.758603084	1	1	1	1	0.779028252	0.871623719	0.952499224	0.986650109	0.902747594	0.795482769	0.958941323	0.972222222	0.852564103	0.771367521	0.920484665	1.397576676	0.914426354	1.286255206	1.040954095
Q9VK39_BcDNA:RH70154	0.84439343	0.758386407	0.67511669	0.801000044	0.89195821	1.002388327	0.702348751	1.572299612	1.04682851	0.969017672	1.034352177	0.746190605	0.716812542	0.944521383	0.902614669	1.125033237	0.804237758	0.892618998	0.771426891	0.793059614	0.912835778	0.752480343	0.669533594	0.881613967	0.870216239	0.80300147	0.681428951	1.025241951	0.790525517	0.747755515	0.852798618	0.924201325	0.701341024	0.962710508	0.668781937	0.893011134	0.935959234	0.860837138	0.836559208	0.772250061	0.855850893	0.68048469	0.797746053	0.856889255	0.993713641	0.995015816	0.836200445	1.476680603	0.900264106
Q8MLP9_BcDNA:RH70879	1.201029083	0.889127517	0.914407159	0.944966443	1.110425056	0.933288591	0.970708757	0.994131634	1.024889968	1.007487226	1.033793697	1.078818232	1.05463598	1.081574782	0.974907676	1.003066473	1.009364284	0.923205076	0.877424803	1.06390068	1.034346616	1.0959811	0.968767849	0.836803572	1.114154421	0.97318137	0.997563677	0.972065338	1.294462901	0.943632337	0.778825996	1.08861474	0.845831318	0.990566038	0.922592998	0.972328592	1.037837345	0.879558716	1.110275346	1.03277717	0.912472648	0.968101333	0.877312819	0.935008953	1.187289591	1.025283408	0.821092408	0.953761594	0.984897931
Q9VIJ3_BcDNA:SD01241	1.18698672	1.007710117	1.041957889	1.118491176	1.085291805	0.90431155	1.092015979	0.928860676	1.160911678	1.101948123	1.037402867	1.247975265	1.149964119	1.131208906	0.989856281	0.976434764	1.129676681	1.113924683	0.910198781	1.109179902	1.120667266	1.134172428	1.083547757	0.933750814	1.206993831	1.081625694	1.032437992	0.976779145	1.344752561	1.050239329	0.943180957	1.099044803	1.088696839	1.113448563	1.091737389	1.078490501	1.080730625	0.927023651	1.185047172	1.14338948	0.987011588	1.131007771	0.966097432	1.020447172	1.143812992	0.953756246	1.008723639	0.888258378	1.036086657
M9PEZ6_BcDNA:SD10385	1.009793814	1.003178694	0.967998282	0.995274914	0.96911512	1.01350945	0.908961593	0.94444658	1.081849987	1.084964054	1.084079812	0.98665949	0.943299477	1.045261809	1.064638596	1.165368307	1.040035499	1.08846644	1.051720476	1.103263948	1.206103087	0.998498498	1.011869012	1.048334048	1.04043329	1.06027456	1.092870172	1.0884289	1.150289476	0.970338647	0.89438328	1.016234372	0.822168315	0.895005287	1.047791208	1.079345385	1.033094449	1.031554177	1.046999679	1.011402289	1.046721574	0.938235142	0.947950671	0.973392404	1.005276803	1.044279258	0.954894808	0.933351687	1.021738206
M9MRG1_BcDNA:SD17344	1.03929502	0.890142258	0.870931719	0.925520724	0.997297254	1.050348768	0.921136852	1.171387628	1.060425125	1.090470504	1.148316217	1.011893957	0.965196039	1.023273814	1.03285558	1.139375984	1.017588811	1.079428167	0.907170801	0.99161395	1.006450807	1.009234869	0.96994019	0.998047662	1.099228362	1.028758251	1.115186786	1.176040183	1.238656396	0.915626283	0.934801478	1.012052675	0.851771942	1.021451777	0.899751738	1.073535253	1.080610725	0.929841112	1.072715988	1.014870904	0.886097319	0.928374483	0.886034173	0.929481556	1.164259837	1.079048002	0.957557613	1.181040555	0.935435654
A0A0B4KFH5_BcDNA:SD18306	1.014262629	1.005409963	0.992552519	0.975971334	0.986580482	1.037658962	0.865568311	1.168433967	1.002366138	1.014897906	1.044430812	0.905792656	0.984435798	1.006637675	1.060883497	1.154497597	1.064774548	0.93937619	0.956216137	1.147459364	1.21232977	0.898184818	0.963613861	1.239768977	0.957590759	1.17640264	1.111015859	1.05843692	1.223317617	0.973496214	0.964357069	0.900343643	0.953967873	1.00359626	0.910289062	0.964217496	0.950210111	1.044759964	0.907869604	0.937858143	1.094549854	0.99169506	1.108177172	1.103918228	1.01031184	1.107094049	0.917132563	1.1314449	1.20047056
Q8MRT7_BcDNA:SD26038	1.162780429	1.305418305	1.301507538	1.224827064	1.159710687	0.983074368	1.133688372	0.97335383	1.250484975	0.965155009	1.030214853	1.02509059	1.098598778	1.047417614	0.959549618	0.977045458	1.340165783	0.953459095	1.087751047	1.141570116	1.222102012	1.203631844	1.250227369	1.184714727	1.386770145	1.329564057	0.976810793	0.95083651	1.390246311	1.138838959	1.04269879	1.116672322	1.089384685	1.054858048	1.194952564	1.254650586	1.181868915	1.011750481	1.297606498	1.234405035	1.151965648	1.053867403	1.194563643	1.196078957	1.165630559	0.97398573	1.187436638	0.956005279	1.028256705
Q9Y168_BcDNA.GH02384	1.097909315	0.874758639	1.088338105	0.918186963	1.022637992	0.953891737	1.252677279	1.042422989	1.386396527	0.790738061	1.055116808	1.381558817	1.34421637	1.001273366	0.829776397	1.009117303	1.008098609	0.850862777	0.859901397	1.246589975	1.059654889	1.356911371	1.237649711	0.879385656	0.983288714	0.826743695	1.002827325	0.98374288	1.156916552	0.928069519	0.89943999	1.095201644	1.017243463	0.98110471	1.100230788	1.340837315	1.159567576	0.950421087	0.919730343	1.022673901	0.833144384	1.212170619	0.858728751	0.84827487	0.945392674	0.82677313	0.764877683	0.99876745	0.822374304
Q9Y164_BcDNA.GH02439	1.010705048	1.02374062	0.926114682	0.978410633	1.06635593	1.155223193	0.978536841	1.082730383	1.0096659	1.063155533	1.007871071	0.93847103	0.931890696	1.014280568	1.114115891	1.242949774	1.13318238	1.035602164	0.874824661	0.899004743	0.955781177	0.907372709	1.156863544	1.192464358	0.994826884	1.169898167	1.102970948	1.106690961	1.526217228	1.00146776	0.951335446	1.067309869	0.97597895	1.092915346	1.013827077	1.020893494	1.056871072	1.04793613	1.038661457	1.005028028	1.023577374	1.145368917	0.95010989	0.979874411	0.835955842	1.118337579	0.912258355	0.853888806	1.218671794
Q9Y124_BcDNA.GH08385	1.0062099	0.919606277	0.85397717	0.938493648	0.980829189	1.248808266	0.896022919	1.128581058	1.042804179	1.144927536	1.031176272	0.841927873	0.810432938	1.090926622	1.069135088	1.224472086	1.036833478	1.154004538	0.890957223	1.008320027	1.030758887	0.915490766	0.98791243	0.980286366	0.988898112	0.910251089	1.099232782	1.18538123	1.13658261	0.858689188	0.932715526	1.185733864	0.861776415	1.11035698	0.97371157	1.10173771	1.063834843	1.086053765	0.982504084	1.042625873	1.007396406	0.872855257	0.968719754	1.027804663	0.898141264	1.211462206	0.953469641	1.16976456	1.11296655
Q9V3Y5_BcDNA.LD23634	1.060538508	0.971636379	1.111708084	1.068089128	1.107557811	0.902499409	1.06715114	0.881793874	0.976107272	0.894157202	0.900616843	1.092870569	1.168314239	0.936022913	0.894991817	0.940229133	1.08289689	0.927749392	0.915783803	1.066275976	0.999363359	1.205757985	1.149923527	0.970454341	1.120269906	1.05871345	0.938605995	0.930583501	1.181989372	1.001689625	0.925132614	1.07141028	1.035595391	1.086427657	1.157140522	0.95146116	0.890426633	0.854011152	1.04356236	1.129869776	0.924045115	1.088825844	0.967005752	0.973871064	1.046103855	0.899942657	0.922574068	0.948327493	0.905157387
Q9VML2_bchs	0.976874897	0.969791037	0.949288868	0.960811042	0.990377192	1.068147828	0.973976465	0.931277322	0.982285734	1.010926841	0.978328939	0.947317559	0.938739919	0.968441503	0.992866018	1.075446721	1.029950076	1.045099839	0.949855596	0.975518323	0.97550876	0.989779398	1.027635885	0.958909802	0.97836834	1.006865682	1.07760548	1.094894342	1.137319449	0.974585113	0.964100281	1.016271671	0.940440581	1.062235517	1.005779912	0.970584999	0.909351526	0.990012568	0.946318636	0.930997237	0.952147776	0.9548063	0.953925296	1.006061429	0.961532613	1.067838084	0.988670611	1.082447397	1.059820823
O76857_BCL7-like	1.03828559	0.868151617	0.936335911	0.963293759	1.066986167	0.951475874	1.118854046	0.947735192	1.037424184	1.065685895	1.102593883	1.157826816	1.086500655	0.92870249	0.853735256	0.815727392	0.758846658	1.147248034	0.792709078	1.24803431	1.063616869	1.182642969	1.131702238	0.91983342	1.027292333	1.058377333	0.844765724	0.848459266	1.108379063	0.905656395	0.797191575	1.005817452	0.987061184	0.866599799	1.045236622	0.938756573	0.913547788	0.892514692	1.023352923	1.066115063	0.907284256	1.078445484	0.9697733	1.022670025	0.998607074	0.828125	0.89183624	0.880511143	0.960542403
O46098_bcn92	1.077433257	0.861905561	0.813016548	0.911578142	1.065717058	1.244463723	0.849730295	1.293872899	1.055994005	1.011646878	1.052442175	0.931859519	0.891291469	1.064055095	1.070307211	1.196005416	0.920468009	1.052190153	0.909032258	0.955868704	1.014250141	0.883645283	0.823133797	0.89991824	1.005477068	0.921378146	0.942070294	1.075011794	0.855853908	0.879098522	0.942580998	0.970296661	0.827096999	0.999341582	0.813636101	1.019171434	1.097821691	0.995897614	1.05461374	1.017611371	0.940209164	0.950477356	0.81998677	0.907026568	1.148656442	1.239738815	0.950157864	1.380262553	1.102874993
Q9VDE4_Bdbt	0.948375732	0.942254867	1.007703332	0.877791711	0.989400454	1.115460408	0.945301861	1.020237555	0.941065214	0.991753669	0.984869118	0.964139809	0.977555761	0.985447625	0.933674754	0.971426972	0.968488512	1.066669476	0.907876438	1.125374015	1.171520081	1.013009404	0.975705329	0.804310345	0.967163009	0.903761755	1.068861625	1.142201835	1.206259161	0.824222355	1.058688699	0.982569296	0.976279318	0.973454158	1.013545222	1.022013652	1.088993174	0.990230375	0.970200512	0.977175768	0.885430887	1.055443953	0.93283782	0.987310834	0.895035231	1.13719932	0.919197646	1.151804757	1.044478189
Q9U4G1_bdl	1.053734393	0.971413812	0.831712494	0.907656312	0.937507144	1.089931602	0.831913804	0.973251315	1.105432149	1.009999829	1.08958164	0.926103283	0.878550864	1.127262498	1.02172267	1.057671244	0.965757278	0.967431406	0.978929555	0.965502702	0.997908909	0.865653155	0.83346127	0.920349012	1.005286813	0.883434698	1.055346725	1.068934601	1.032365002	0.938039006	0.997252708	1.043435232	0.955044801	1.043169193	0.837926373	1.03061657	1.056108216	1.033181802	1.000937722	0.918423684	0.998923766	0.829824988	1.007965714	1.036150241	1.080457728	1.042942787	1.011496187	1.043510038	1.050860596
Q9VXZ3_be	0.734377245	1.254561126	1.195517885	1.011492602	0.747019106	0.818273237	1.101459854	0.662043796	1.168613139	1.08540146	0.802189781	1.212408759	1.324342324	0.711954712	0.707292707	0.839160839	0.796203796	0.895043732	1.249271137	0.562682216	0.912536443	1.26830849	1.303953338	0.875567077	1.139987038	1.036292936	1.096056091	1.132515337	1.218404908	1.107800175	1	1	1	1	0.993921516	0.810583713	0.785375883	1.038973809	0.854295164	0.914186109	1.068919281	1.102541475	1.14101659	1.019414049	1.149425287	0.849529781	0.981452456	0.803291536	1.012060302
Q94513_BEAF-32	0.970766407	0.986018051	0.973917699	0.999464586	0.95354138	1.020728163	0.906591177	1.065450723	0.949063145	1.030853497	0.987219681	0.994651815	0.95895058	0.973061945	1.017102252	1.069031274	1.016198964	1.078324285	0.946497482	0.985970305	0.91428478	1.004012078	1.01629648	1.060305249	0.980332547	1.045187575	1.05646138	1.083696164	1.117306749	0.941456726	0.947139377	0.89961086	0.934054183	1.001782319	0.942321754	0.877194864	0.910801509	0.945929082	0.933108444	0.916914467	0.969357213	0.889451639	0.926009049	0.951344799	1.005424355	1.011440195	0.924549533	1.038143601	1.008256677
Q9VHH8_beag	1.056424483	0.946240552	1.046026476	1.044235222	1.094193718	0.871226353	1.112246885	0.927083333	0.990070093	0.934968847	1.091997664	1.076323988	1.169092315	0.870069606	0.865218308	0.890459116	1.038740069	0.939446632	0.837262824	1.034726129	0.981486217	1.130910725	1.095406247	0.97126898	1.094603705	0.978620269	0.96501117	0.913833992	1.169822994	0.996631724	0.879717089	0.964271047	0.949988592	0.985489391	1.072401051	0.930227044	0.892425949	0.820973383	1.049696682	1.078744047	0.856857747	1.200654482	0.905040306	0.944847953	1.126687013	0.886356957	0.90896349	0.865875438	0.907572757
Q94534_beat-Ia	1.185100098	1.089596324	1.075812274	1.020676075	1.116508041	1.060387266	1	1	1	1	1	1	1.313461538	1.150961538	1.143269231	1.464423077	1.266346154	1.034965035	0.99020979	0.913286713	1.093706294	1.725773196	1.573195876	1.053608247	1.437113402	1.210309278	0.997690531	1.074672825	1.234026174	1.010007698	1	1	1	1	1.063439065	1.016694491	1.467445743	1.191986644	1.078464107	1.196994992	1.01836394	1.359384079	1.00929692	1.134805346	1.541953232	1.365887208	1.598349381	1.116918845	1.089020772
Q9BMG9_beat-IIa	1.229803922	0.920784314	1.165333333	1.053019608	1.237647059	0.968	1.154334324	0.838644342	0.987712665	0.90615717	0.863759114	1.299891979	1.422535211	1.152480098	1.10609308	1.064911206	1.249081445	1	1	1	1	1.294892259	1.223064645	0.91141261	1.070830008	1.096368715	0.869452478	0.867058941	1.102622918	0.980452778	0.964963504	1.1837794	1.02595296	1.114517437	1.271220671	1.086842887	0.976358776	0.885654886	1.212533413	1.212711613	0.948856549	1.308375635	0.866059068	0.979464698	1.139396709	1.048750762	0.940889701	0.946678854	0.846280603
E1JIN2_beat-IIb	1.267260579	1.045100223	1.187360802	1.055957684	1.266146993	0.939309577	1.100608519	0.79959432	0.752129817	0.989452333	0.862474645	1.053144016	1	1	1	1	1	1	1	1	1	1.345085151	1.20107559	0.975799223	1.224081267	1.066925605	1.079255192	1.070899976	1.313678682	1.139890189	1	1	1	1	1.199283621	1.140345164	1.070661022	0.948550961	1.158905894	1.251058287	0.893194399	1.3270745	0.912416717	0.903452453	1.173044072	1.096515203	0.913392552	0.910317731	1
Q8SY13_beat-IIIc	1.100376086	1.022565167	1.197120996	1.064194009	1.159706912	0.82596291	1.081566281	0.762586184	1.042279173	0.870170418	0.962924418	1.203850657	1.195564516	0.77016129	1.451612903	1.074596774	1.175403226	1	1	1	1	1.166871921	1.176231527	0.998399015	1.102463054	1.094458128	0.878017642	0.849001857	1.150766017	1.046425255	1	1	1	1	1.244405382	1.008924346	0.940369143	0.900006761	1.128929755	1.225812994	0.958082618	1.370503101	0.873328739	0.9356306	0.977699531	0.841158059	0.761345853	0.792644757	0.805585106
A0A0B4KGP4_beat-IV	1.089380531	0.919469027	0.931415929	0.963716814	1.04380531	1.061061947	1.088966885	1.103006257	1.05249504	1.105905692	1.145276972	1.116740424	1.167868368	1.132002219	1.001663894	1.180070253	1.062303568	1.186131387	0.922141119	1.346309813	1.193430657	1.068200161	1.075464084	1.039278988	1.105999462	1.02488566	1.149246919	1.113190324	1.074851666	0.923322684	1	1	1	1	0.935355392	1.017156863	0.962928922	0.831801471	1.042279412	1.013786765	0.802849265	0.952845017	0.838572776	0.912291732	1.089466089	0.745069745	0.706108706	0.826358826	1.038477891
Q9VG28_beat-Vc	0.966436328	0.777887463	1.042448174	1.176702863	1.047384008	0.927936821	0.701598579	1.095914742	0.674955595	0.884547069	1.008880995	1.520426288	1.186633432	0.940956535	1.047982552	0.929116685	1.276367035	0.970622797	0.742655699	0.964747356	0.843713278	0.943290286	1.037244993	1.236384054	0.938611267	1.157215048	0.95010846	1.004555315	1.167895879	1.229067245	1	1	1	1	1.193778684	0.968383478	0.919938807	0.765425803	1.114227435	1.058133605	0.832228455	1	1	1	1.336923077	1.169230769	1.118461538	0.612307692	1.455686275
Q9VBC9_beat-VII	0.949901405	0.863723194	0.7930737	0.813717032	0.935112152	1.158090954	0.87764063	1.05160273	1.001101112	1.009039993	1.0263995	0.94217123	0.870827496	1.064296411	1.013525917	1.145017149	0.977102555	1.105457833	0.894312017	0.983725136	0.920812099	0.953553061	0.898890578	0.90785005	0.959763237	0.997735873	1.074463578	1.124353116	1.144190903	0.875934389	0.958365748	0.940645979	0.852306451	0.997089924	0.863115992	0.993383665	0.992642416	0.994262183	0.941633493	0.911708991	0.899135209	0.868157286	0.895763206	0.937755044	0.990161125	1.144128458	0.893734627	1.130116353	1.036661993
Q8T3L6_beg	0.96121485	1.012178021	1.097239649	1.024614363	0.995547027	1.00381332	1.018952062	1.074760312	1.000557414	0.991705686	0.974292085	1.138439242	1.165574186	0.964074892	0.991887879	1.047803571	1.109513635	0.934797405	0.920232315	1.057443623	0.993466128	1.112947769	1.122059387	1.024835205	1.019896386	1.048299635	1.017672484	1.032586408	1.221171577	1.005782649	0.972643225	1.042816005	1.058123674	1.019475599	1.089523604	0.976490934	0.987988759	0.98673224	1.024346745	1.11953144	0.973829276	1.042131845	0.988968634	0.968434343	0.963763102	0.953717229	1.013556803	1.002280823	0.994966173
A0A0B4KGU4_bel	1.249065665	1.034800389	1.180316683	1.105037263	1.131143608	0.978775526	1.18333253	0.893697517	0.980188523	0.972461135	0.930994754	1.151946048	1.120584344	0.92663045	0.958530132	0.949303347	1.192022968	0.956829294	1.01914949	1.13362319	0.999446529	1.189783068	1.237783581	1.054740238	0.995415171	1.063936597	1.0061357	1.010739809	0.992652569	1.034547165	1.00942081	1.088511892	1.153108785	1.05726318	1.2393701	1.100444949	1.010637304	0.977021236	1.010653252	1.214853495	1.001145976	1.148356007	1.061811404	1.044372464	0.954546344	0.928838768	1.044511852	0.900362044	1.007424859
P35128_ben	0.988941086	1.063801427	1.073213154	1.058718987	0.944450766	0.946639792	1.059871494	0.913283324	0.918261687	0.94413471	0.891497895	1.023616707	1.055459758	0.965100871	0.971560841	0.948604799	1.059838607	1.023019631	1.102764812	0.950705719	0.956568104	0.94363698	1.154527945	1.117166601	0.94135874	1.184381353	1.002848919	0.976378533	1.05352038	1.051422986	0.991983431	0.919700457	1.070148693	0.96155691	1.080800019	0.945614921	0.930268316	1.038915233	0.975140262	1.002846311	1.041937604	0.919216187	1.113122032	1.130541251	0.901309342	0.936540503	1.048049891	0.94241745	0.962512036
Q8T0T9_BEST:CK00246	1.201875781	0.900145271	1.007977164	1.107143767	1.242296812	1.033922063	1.250591156	0.918952471	1.168065737	1.025537952	1.041380941	1.081816032	1.134816668	0.915081298	1.047067343	1.072542953	0.98255546	1.085597399	0.912304626	1.069547886	1.227105843	1.064692403	1.200716846	0.937011575	1.202362066	1.044127152	1.029163799	1.075619408	1.484772884	0.957243634	0.894641338	1.25727247	0.934165013	1.01298554	1.214148087	1.342760804	0.903592073	0.999724745	1.299958712	1.223781998	0.91164327	1.417649475	0.903068709	0.892184475	1.161199529	1.116063661	0.987615782	0.949132593	1.117055563
Q9VRP2_BEST:CK00496	1.091275728	1.235225959	1.44497643	1.250603103	1.102184367	0.871107545	1.453250959	0.714594731	0.923470414	0.978513488	0.879783689	1.230965855	1.303281695	0.955828137	0.965579827	0.910174048	1.425115421	0.91139705	1.12980556	1.039835641	1.003931547	1.205316542	1.400110177	1.110597633	1.03675111	1.200603422	0.989308083	0.865828813	0.940366452	1.324811637	1.12032805	0.978476811	1.278232879	1.01879782	1.445931534	0.978471974	1.003808805	0.975186466	1.020471497	1.294483526	1.072748168	1.191089837	1.187935236	1.13599677	0.913011929	0.826691435	1.135111601	0.758092806	0.960223073
Q9VSH0_BEST:CK01174	0.941359223	0.958834951	0.865631068	0.863300971	0.907961165	1.544854369	0.961290323	1.641474654	1.50875576	1.208294931	1.390322581	1.158525346	1.249516441	2.125725338	1.760154739	1.725338491	1.063829787	1.465076661	1.243611584	1.193356048	0.982964225	1.244635193	0.963519313	1.190987124	0.905579399	1.055793991	1.313563693	1.123775142	1.162970603	0.866425993	1.03022339	1.104467806	0.783180026	1.013140604	1.041084286	1.728081321	1.63193562	1.313426514	0.934349852	0.942397289	0.991952562	1.052405162	1.047516621	1.127884239	0.975211268	1.196338028	0.936901408	1.083098592	1.367346939
Q7JVX3_BEST:GH09055	0.806039289	0.737281088	0.883680245	0.634149947	0.806729211	0.633460025	0.81868084	0.729371787	0.804149362	0.585615676	0.886846156	1.020059443	0.914713788	0.681245696	0.6275517	0.673571159	0.756752704	0.635514621	0.675579533	1.026437683	0.749218154	0.927970123	0.798964955	0.710453549	0.704950603	0.706794022	0.69414353	0.729154455	0.747341256	0.6935269	0.804212746	0.808156662	0.722638077	0.627557509	0.827894727	0.740743704	0.800333516	0.807034601	0.728486072	0.77968876	0.651943561	0.975467713	0.7701207	0.734453832	0.892524021	0.613108951	0.705652638	0.640494184	0.574836735
Q6NMY2_BEST:GH10831	0.380239693	0.694276132	0.488817758	0.722985014	0.406236254	1.022818276	0.502132051	1.212536461	0.406594592	0.987979214	0.613466599	0.322478953	0.284646198	0.637002401	1.18929412	0.826482248	0.685414661	0.971658557	0.778533098	0.374247629	0.465926793	0.307139552	0.51348999	0.854659922	0.589265562	0.523701643	0.513853251	1.198939623	0.504094063	0.808031736	0.831853478	0.469548677	0.636812205	0.74396458	0.516177118	0.36466554	0.523230596	0.791876339	0.428196591	0.431476421	0.811371061	0.401500642	0.833465833	0.685016245	0.476243777	1.363451964	0.911654066	1.443405864	0.520736049
Q9VC18_BEST:GH11240	1.356710975	1.421580082	2.085806569	1.155983969	1.470488252	0.648866579	1.311265895	0.680697049	1.448618627	0.640907504	1.018570836	1.284877857	1.343319145	1.282383478	0.740569874	0.745195187	1.338237647	0.788209663	0.956578624	1.733016691	1.606288726	1.769110546	1.17002126	0.95170762	1.662094743	1.273514584	0.852644451	0.736666957	1.334576934	1.155233992	0.965925405	1.525103235	1.242233991	0.779554448	1.406110317	1.356335031	1.565228114	0.875565448	1.53924773	1.2336684	0.891094585	1.531287014	1.094849463	1.15223096	1.202787353	0.627785663	0.985125106	0.605638239	0.746775874
Q9VSX2_BEST:GH12586	0.709741256	0.678882402	0.508255825	0.765726265	0.729190373	1.415666898	0.44366044	1.529749431	0.825811312	1.362107475	1.210869484	0.476447151	0.591171475	1.024649009	1.191180764	1.286479206	0.872508559	1.293759913	0.978110185	0.716606641	0.819334543	0.560495217	0.572194414	1.103432752	0.67888517	0.821034861	1.023245465	1.355467046	0.828240861	0.77003908	1.054088292	0.832922374	0.71315221	1.306918822	0.53102065	0.846347875	1.033150486	1.121448795	0.659388248	0.742712718	1.172190059	0.42529459	0.8345088	0.820310974	1.172409083	1.443681185	1.017171532	1.375059761	1.282819318
Q7K5N8_BEST:GH19547	0.966476776	1.195972711	1.01907262	1.185708425	1.134078375	1.027492457	0.944281491	1.062557409	0.988552947	1.211535047	0.857293926	0.873183176	0.883416339	1.055074017	1.351289829	1.218737555	1.172906455	1.264501728	1.260099383	0.967110524	1.027842696	0.867939988	0.991516684	1.281429237	0.985336083	1.185958382	1.261970063	1.279262874	0.987582479	1.127082573	1.437917428	0.845201672	1.255937278	1.182334614	0.938567646	1.016593312	1.126999545	1.406286572	1.070555303	1.029797137	1.292160335	0.881004274	1.247978253	1.279657693	1.000655697	1.256309539	1.367911048	1.056244587	1.242973905
Q9W2H8_BEST:GH22856	1.1801052	1.449740035	1.373533512	1.31316765	1.157603428	0.943200296	1.194850807	0.753246268	1.179701404	1.074170469	1.190209571	0.991616978	1.035169218	1.122700026	1.236110744	0.951444165	1.299351583	1.087580469	1.364804647	1.110203354	1.305562796	1.121005201	1.23296201	1.30305982	1.353322148	1.472217758	1.147777261	1.002171492	1.226692171	1.311373599	1.301014026	1.317794948	1.333494777	1.298532623	1.222551043	1.168705556	1.075541525	1.15434745	1.257801631	1.110554789	1.33794549	1.07029668	1.408932001	1.407256758	1.260244559	0.899939821	1.383312159	0.786930394	1.162045311
Q8SYQ4_BEST:GH25016	0.75681119	1.009486337	0.863455128	0.743016597	0.742462011	0.673418993	0.718407394	0.831759971	0.696160934	0.657774978	0.708680445	0.78517028	0.824835553	0.746810234	0.917024758	0.80990315	0.958409083	0.687438076	0.858700398	0.769832407	0.728165041	0.900607399	0.814822119	0.891443822	0.85025374	0.988272725	0.782635942	0.742864766	0.852902489	0.764742015	0.79068729	0.733039235	0.911878567	0.714543458	0.686287676	0.666901325	0.674715432	0.897820931	0.688459164	0.739925054	0.897171109	0.796719075	1.030122744	0.942335253	0.785422568	0.719910162	0.924364067	0.845867623	0.6268287
Q8T972_BEST:GH28095	1.21390169	1.038210445	1.61328725	1.243663594	1.134792627	0.807987711	1.461690363	0.802922591	1.019747235	0.857424961	0.779620853	1.61492891	1.709964413	0.884045077	0.867141163	0.920225386	1.258303677	0.858687815	0.802451334	1.2703677	1.021629416	1.513847465	1.567959097	0.83809118	1.089049851	0.881550916	1	1	1	1	0.545560295	0.94067468	0.973245444	0.886002326	1.162582188	1.016736402	0.979378362	0.837417812	1.156007173	1.173042439	0.870292887	1.568128426	0.841131558	0.881949883	0.802895102	0.760460044	0.69740234	0.744001586	0.758041458
Q95R34_BEST:GM01072	1.007248509	1.09848343	0.910824618	1.115708669	1.058282291	1.017733437	0.995336232	1.07638495	1.184155795	1.164177223	1.089935085	0.905590219	0.943846735	1.10815402	1.315873915	1.287561344	1.173461684	1.005733646	1.077317349	1.069933107	1.101120667	1.248447205	0.934930494	1.075717243	1.157054126	1.082815735	1.090838796	1.150680787	1.281828879	0.982249117	1.058124065	0.976051888	0.951688009	0.990271079	0.943919088	1.111191132	1.088708667	1.123997996	1.122463677	1.022795591	1.083573397	0.835177948	1.049222875	1.082962919	1.083029902	1.235076685	1.071444334	1.233752621	1.074315358
Q7JY89_BEST:HL05962	0.892450814	0.977622729	0.783267333	0.984159909	0.806273179	1.124269282	0.804234049	1.074448692	1.16736254	1.304557483	0.960011761	0.830990885	0.912707546	1.101265823	1.445503863	1.224012275	1.070305222	1.442949093	1.132826214	0.85059489	1.007216696	0.752677391	0.776284009	1.335642346	0.942122773	1.000820307	1.406756757	1.163513514	1.309459459	0.877027027	1.241545894	1.008844296	0.947454478	1.045559272	0.942332558	1.063098009	1.112748901	1.060253426	0.986552883	1.11611068	1.123092837	1.043519395	1.126773888	0.926206244	0.908198331	1.122565865	0.9009982	1.116511209	1.385324948
Q8IMV0_BEST:LD10347	0.856728997	0.991308928	0.976033711	1.004477219	1.065314722	0.990255465	1	1	1	1	1	1	1.025028441	0.899886234	0.858930603	1.022753129	0.997724687	1	1	1	1	1.170752325	1.256128487	1.29501268	0.830092984	1.238377008	1.104545455	1.172727273	1.315909091	1.188636364	1.521575985	1.234521576	1.401500938	1.508442777	1.000132275	0.955952381	0.982142857	1.073809524	0.969179894	1.09047619	1.231084656	1.134531693	1.144181646	1.238410596	1.570564516	1.554435484	1.544354839	1.614919355	1.162627327
Q9VID9_BEST:LD19244	1.045062868	0.93708784	1.071573024	0.972302822	1.016750198	0.910577684	1.140082113	0.825050555	1.061891047	0.932164961	0.986151112	1.157975366	1.28297573	1.008353852	1.010024622	1.005188181	1.095497714	0.947075606	0.97703281	1.186162625	1.137589158	1.227156507	1.142376531	0.999394429	1.109742969	1.11034854	1.000229958	0.956020581	1.166604386	0.977722843	0.943552459	0.973947289	1.094516813	0.963445421	1.230076122	0.964618611	0.98357154	0.892263477	1.098298897	1.071267671	0.916420693	1.070912807	0.81246594	0.824318801	1.115103127	1.01996008	0.927644711	0.986360612	0.980105711
Q9VNA3_BEST:LD29996	0.82288064	1.121511563	0.861737564	0.878998454	0.845751717	0.908340373	0.860368212	1.15783611	0.98525089	1.038615853	0.930875148	0.896776855	0.865135577	0.98000922	1.038025788	1.062067809	1.010183982	0.84603783	1.17026864	0.719862309	0.803310976	0.786938453	0.824604477	1.238152269	0.849192187	1.106686468	0.978233457	0.995140357	1.045443964	0.907016897	1.153251478	0.948453843	1.057719418	0.954570259	0.692219177	0.741117604	0.849180285	1.098469177	0.749211316	0.809927079	1.160607158	0.935963954	0.952758056	0.92446447	0.923641232	0.969093876	1.104419743	1.087739362	0.841175578
Q8IQ06_BEST:RH19272	0.520661157	1.146399055	0.811097993	0.576151122	0.495867769	0.412042503	1	1	1	1	1	1	1	1	1	1	1	0.724727838	1.256609642	0.637636081	0.550544323	0.428748451	0.381660471	0.874845105	0.671623296	1.049566295	1	1	1	1	0.775917065	0.531897927	0.79984051	0.449760766	0.863086233	0.951588502	0.89183056	1.167549168	0.967473525	0.895234493	1.223146747	0.894909688	1.175697865	1.041050903	1	1	1	1	0.646857143
B7Z0U6_Best1	1.023934287	0.814615494	0.959779068	0.921115989	1.069820139	1.165415664	0.805600555	1.062254108	0.937051608	1.049062717	1.073362648	0.897940292	1.041189342	1.145578582	1.061269147	1.305573433	1.06075428	1.017125211	0.924199888	1.094516189	1.174995321	1.029861016	0.892803082	0.910141737	1.031512316	0.834319527	1.08762046	1.18391401	1.233061527	0.943661972	0.912277868	0.959369952	0.841518578	0.98174475	1.097755518	1.150899648	1.04526062	0.97736969	1.073177518	1.133555927	0.936560935	1.108977598	0.845039582	0.820616473	0.989144138	0.970233926	1.098473176	1.305504973	0.97420258
Q9VRW4_Best2	1.002914602	0.872631886	0.87773244	1.003643253	1.000728651	1.132031478	0.831147541	1.066393443	0.851639344	0.855737705	0.840163934	0.908196721	1.082023818	1.02261997	0.973081531	1.147558312	0.947713339	0.927038627	1.081545064	1.278969957	1.057939914	0.740837872	0.800820389	1.143500773	0.853540448	1.032681057	1.095192075	1.140613675	1.200773134	0.931384392	1.020892688	1.034715627	0.886039886	1.072807851	0.916773917	1.032747033	1.06006006	0.925139425	0.986986987	0.999213499	0.856999857	0.946307323	0.921654654	0.929384728	0.944565692	1.112032591	0.902371599	1.056016296	1.013750277
Q9VVX6_Bet1	1.04128865	0.986854286	1.044065914	1.033327162	1.106461766	1.113682651	1.052412238	1.056971955	0.904049814	0.92630908	0.962345558	1.127377917	1.279918864	1.14198783	0.938742394	1.107505071	0.940770791	1.036470588	0.928235294	1.011764706	1.036470588	1.156836965	1.140683696	0.942336589	1.002441773	0.972952667	1.112605804	1.098246675	1.259220073	1.053506651	1	1	1	1	1.174852321	1.065991561	1.077974684	1.004725738	1.061434599	1.074767932	0.9907173	0.95597723	0.794497154	0.872485769	0.876927166	1.048245614	0.847288676	1.116427432	0.971819425
Q9VSY8_Bet3	1.140820193	0.98965927	1.02951283	1.05950737	1.137030733	1.037701917	1.083553347	0.935844075	1.133514521	1.051436558	1.08024538	1.175959	1.152981046	1.126850175	0.981543931	1.056996196	1.126169078	1.005986254	0.981996896	1.178523391	1.163594708	1.151104483	1.090995547	0.923572386	1.128669001	1.013919509	1.053293307	1.05026918	1.275993088	1.039402264	0.951342756	1.129416961	1.023268551	1.021378092	1.19044586	1.170933366	1.097660461	1.000759432	1.164049486	1.177327291	1.018508084	1.152596261	0.946217802	0.989294205	1.040112171	1.024620744	1.01772743	0.956589415	1.031316574
Q9VA95_Bet5	1.079216402	0.958213069	1.038081228	1.033258226	1.117465224	1.058658126	1.139455521	0.938650307	1.183320552	0.996817485	1.07607362	1.101533742	1.18185622	1.084390282	0.94536991	1.009100656	1.010382071	1.035021906	0.948959474	1.16262322	1.077847755	1.196880617	1.080421604	0.960246139	1.102933561	1.022024553	1.046498774	1.091408436	1.263239714	1.00521643	0.943910753	1.076138829	0.938394794	1.059095135	1.099391658	1.032911725	0.988270821	0.951507725	1.068865158	1.088231432	0.925992385	1.122293892	0.951723443	0.967909696	1.066102832	1.074536394	1.012147204	0.988883032	1.021784473
Q9VMY5_beta-Man	0.969167065	0.98720819	0.979415728	0.936671304	0.978589749	1.06418728	0.883066899	1.050404805	1.003683798	1.030501299	1.013910462	0.97146431	1.038867191	0.993912177	0.964722253	1.159564207	1.022517038	0.995465445	0.994988933	1.003320216	0.995988072	0.934019324	0.936082421	0.921832953	0.983123606	0.953112586	1.027031636	1.091285069	1.093992496	0.944316534	1.013861098	1.026266963	0.884090661	1.013260814	1.015680938	1.032941843	1.019178783	1.037599547	1.018393366	0.966884635	0.92037152	1.027256904	0.992099448	0.97294061	1.010011772	1.055595054	0.89684029	1.056853809	0.999503329
Q9VCA5_beta-PheRS	1.044148282	1.076504966	1.151502656	1.071855159	1.069981728	0.969466979	1.114937758	0.878278052	1.069947638	1.002222482	0.992307792	1.143734893	1.163907652	1.073110979	0.981270197	1.019558091	1.16291604	0.966962702	1.003278173	1.087886488	1.086136818	1.132877106	1.193791281	1.037828603	1.102636613	1.133461181	0.970739019	0.985613198	1.217512449	1.061487602	0.990939181	1.06242557	1.069392823	1.03318345	1.135820719	1.046523853	1.042848109	1.003082882	1.065337338	1.144077309	1.031259634	1.124371182	1.058137066	1.051338484	1.034311701	0.92970468	1.041058383	0.940066641	1.002107505
Q00963_beta-Spec	1.005531187	0.945254629	0.94902968	0.918168913	1.013730484	1.087815056	0.98955508	0.968069464	0.99578995	1.009789071	1.023880993	1.028908808	1.010815297	1.023290111	1.008125858	1.108010683	1.010105231	1.028293902	0.932415506	1.019305928	0.975122729	1.005062512	1.023691619	0.936095578	1.002123355	0.991301893	0.966646081	1.042080517	0.890957458	0.987375715	0.952391721	0.985618033	0.939394661	1.031679492	0.986817245	1.003684129	0.999762164	0.984200204	0.978463364	0.927469775	0.938229523	0.973928128	0.938214336	0.975968625	0.954722113	1.075476324	0.915693289	1.057835617	0.9805177
O62621_beta'COP	1.011364041	1.074050707	1.168020922	1.106733455	1.077551249	0.962791479	1.244715758	0.925364053	0.984764246	0.987852994	0.919034448	1.227561565	1.271151806	1.004135473	0.9668415	0.973513546	1.08643774	0.962352116	1.013090399	1.092715002	1.051712271	1.209145772	1.234070335	1.042244564	0.999695547	1.032583251	1.010517115	0.977935049	1.098761255	1.048428229	1.012738234	0.999739652	1.099757218	0.991207764	1.21270809	0.952520898	0.966391198	1.023010789	1.002288695	1.076874896	1.07299769	1.191957379	1.050993107	1.044092449	0.939835483	0.955301866	1.035474149	0.967561999	0.930095174
P45437_betaCOP	1.063007414	1.029955788	1.174907565	1.135473522	1.140129507	0.995926013	1.323643662	0.906779208	1.098715591	1.076019018	0.939473262	1.280410278	1.327454047	0.976833218	0.972603208	0.993830167	1.096051136	0.983647515	1.043164734	1.244420488	1.173343628	1.268021546	1.267925358	1.026602908	1.096572952	1.05150191	1.049293845	1.032590231	1.209679428	1.102164545	1.02156256	1.150343089	1.079459272	1.049002599	1.267959507	1.060018406	1.023875787	0.961026289	1.073730351	1.155780269	0.961052161	1.275798345	1.020378524	1.048426884	1.043555884	1.001421081	1.036337612	0.990473112	0.947590732
Q1WWB7_betaG	1.119147179	1.01522895	1.029038253	1.094884105	1.086443653	1.195524237	1.030471615	1.074598559	1.029333671	1.054494879	1.120242761	1.11821975	1.086431971	1.036005467	1.028276545	1.108817569	1.18690796	0.906211937	0.957064555	1.067295981	1.038063337	1.057847465	1.061348759	1.061247273	1.060942812	1.02917745	1.119535519	1.115915301	1.285040984	1.054713115	1.023218575	1.068454764	1.04753803	1.127001601	1.112853445	1.21485464	1.105212067	1.039725209	1.087490044	1.166019514	1.069892473	1.047592212	0.977683226	0.94801206	1.077849117	1.012212995	0.9098681	1.047072371	1.20098723
Q24173_betaggt-I	1.106598985	0.939250041	0.906937394	1.048632717	1.190491785	1.11827957	0.92353418	1.281455462	1.186526164	1.076916149	1.238133838	1.052508331	1.005925174	1.087015405	1.058235991	1.110095367	1.180350996	0.969051198	0.922672208	1.03435317	1.02524538	1.097759819	1.073373033	1.046221466	1.114419396	0.923720403	1.088289672	1.095173081	1.270330233	0.971925932	0.89739825	1.067128678	0.971809479	1.081106478	0.983505821	1.209451811	1.058133894	0.995431759	1.082794308	1.116874191	0.96090718	1.050105514	0.923597208	0.942265029	1.069206009	1.122049356	0.986587983	1.121378755	1.082664893
Q9XZ68_betaggt-II	0.977100244	1.049099188	0.95581733	1.012835742	1.0418399	1.0959216	1.049193548	0.979032258	1.091695728	0.983347864	0.998844813	1.009524847	0.939066267	0.933148243	1.050217968	0.973819439	1.044908794	1.059595202	0.950074963	1.101349325	0.994790105	0.924579935	0.961523726	1.062010837	1.065568387	1.00194297	1.096250699	1.168339972	1.210013496	1.005003456	1.005414318	1.039401472	0.970098196	0.988974479	1.106007343	1.134286384	0.96317996	1.115303492	1.034137958	1.010832487	1.089732573	0.96444006	1.087819429	1.073069335	0.949973743	1.007545397	1.03291783	1.096597662	1.030620594
Q9V9T9_betaGlu	1.022734177	0.962987342	1.085468354	1.051189873	1.046886076	0.946734177	1.174274464	1.041271693	0.984395508	0.839288319	0.939769579	1.243255068	1.254057428	1.041822722	1.057740325	0.942259675	1.151685393	1.125	1.152616279	1.392926357	1.263081395	1.059780971	1.040590777	0.926454335	1.107806691	0.949964835	1.011093034	1.002810235	1.157077355	0.930335749	1	1	1	1	1.02150422	0.957529165	0.996666846	0.868931778	1.021988065	1.054459438	0.840599968	1.275610867	0.956442556	0.980118379	1.071428571	1.077194106	1.0256246	1.117873158	1.011766772
Q24560_betaTub56D	0.960735852	1.08753033	1.06108094	0.981670737	0.966939907	1.013758069	1.029475984	0.921185538	0.980848494	0.937757958	0.958807021	0.98908883	1.043170324	0.98662076	1.0239092	1.034048174	1.049522168	0.999566175	0.994129823	1.02025378	0.944157863	0.923611388	1.020097397	0.946010632	0.950946043	1.014752321	0.988206991	1.025124874	0.937906456	0.968284051	1.002807099	0.973383639	1.016111062	0.971671965	1.004983344	0.951629241	0.888331149	1.075810626	0.912860484	0.866490507	1.014775406	0.946194606	1.030498151	0.997401206	0.978671837	1.035248541	0.980071814	1.041047959	0.895659775
P08841_betaTub60D	0.991014884	0.745124488	0.802327442	0.797000389	0.998765404	1.158874231	0.909749684	1.471127767	1.402575623	0.815731175	1.478187954	1.092486387	1.17969203	1.046259906	0.81418723	1.013594485	0.838251401	0.91186692	0.808967765	0.950542916	1.012078526	1.211332962	0.907087742	0.804072866	0.94561557	0.775939331	1.019680125	1.041019842	1.213867144	0.850254814	0.906263942	1.143080218	0.820558579	0.954581958	0.791958562	1.26366068	1.267672908	0.917653802	0.94815947	0.921878317	0.823058634	1.081826882	0.761378137	0.802716929	1.023986012	0.995247125	0.804393331	1.29652523	0.951578259
P61857_betaTub85D	1.077807589	1.078957455	1.011498658	1.109237256	0.987351476	1.011498658	0.862470862	0.976107226	0.971445221	1.111888112	1.032634033	0.864801865	1.183310534	0.928864569	0.924076607	1.378248974	0.55745554	0.923654568	0.616395494	1.356070088	1.146433041	1.643231114	0.706806283	0.391174271	1.222887061	0.679880329	1	1	1	1	1.005718954	1.433006536	1.04003268	1.123366013	1.086484463	1.359790341	1.110071134	1.06027705	1.265818046	1.222388618	0.979408461	1	1	1	1.046791444	1.201203209	0.784090909	1.14973262	1
Q8MST5_betaTub97EF	0.959781102	1.170152727	1.039576184	1.042538768	0.956382223	1.092475787	0.995471878	0.936023726	0.918526904	0.982399463	0.898452671	0.874421848	0.949685993	0.976500852	1.151184061	1.05969139	1.175030201	1.045674981	1.188542955	0.925705935	0.967197986	0.956814442	1.041526181	1.047423094	1.006943768	1.117169816	1.007322259	1.087416055	1.049812987	1.092071598	1.222659079	0.969962909	1.20891155	1.0481714	1.014957811	0.986590694	0.968944796	1.194268871	0.946095007	0.892437027	1.1663771	0.942723971	1.156864279	1.131353	0.959113978	1.052394134	1.175829873	1.02752767	1.088306034
Q9V3D1_BG:DS00797.2	1.260606061	1.187558275	1.034382284	1.131963869	1.229865967	1.049679487	1.19320077	0.940218089	1.36690186	1.087748557	1.137395767	0.943040411	1.007379596	0.999007423	1.017348524	1.039142068	1.028094252	1.14606912	1.134781685	1.023454805	1.20326486	1.105200111	1.174371103	1.243019934	1.246275763	1.307767915	1.162085707	1.060973279	1.345770098	1.092664093	1.14548199	1.342910681	0.970278992	1.038049136	1.18764852	1.293799957	1.206308058	1.201339382	1.290640527	1.260774465	1.128888529	1.088329887	1.13436136	1.234349874	1.104317517	0.977737801	1.221812458	0.948999325	1.187749667
Q961T9_BG:DS00941.11	0.797786644	0.783016111	0.716450244	0.800855103	0.724944094	1.6530926	0.66296692	1.651521053	0.655612692	1.106050265	0.937331823	0.525827351	0.538176961	0.725924532	0.919409548	2.025451307	0.787439126	0.999689072	0.724570013	0.642562872	0.852983091	0.471284156	0.685686386	0.82007936	0.757138745	0.755383339	0.798331349	1.593750865	0.818566511	0.775479691	0.852548382	0.809484414	0.749446004	1.191896883	0.683348399	0.745868024	0.763142871	0.832056711	0.723207574	0.661986774	0.831933013	0.541771048	0.83750676	0.790692285	1.113216394	1.641348116	0.829361796	1.561216835	1.18921958
M9PCX0_BG:DS01368.1	1.010175465	0.978568992	1.074279001	1.04011445	1.018456058	0.948611058	1.037076492	0.938236724	1.061439059	0.958778166	1.021722517	1.093513351	1.194638763	1.089118805	0.982540709	1.034095585	1.065663394	0.973803286	0.942215679	1.003442378	0.933598909	1.153812365	1.156813939	1.010395695	1.111021633	1.049635785	1.018872069	1.016272812	1.192656184	0.912906591	0.984689637	0.983456227	1.018233007	0.978629843	1.135388141	1.046791285	1.030092868	0.940483986	1.040376831	1.086572806	0.960754256	1.137811933	0.974570417	1.02093947	0.973050542	0.960159556	0.901809603	0.955538259	0.915288595
Q9V3Y7_BG:DS01759.2	0.81241335	0.749923631	0.702179072	0.765318911	0.862593895	1.115360816	0.816526535	2.23643709	1.054224806	0.670775194	0.854695886	0.9603548	0.890559358	0.938826952	0.808845849	1.169946166	0.731419766	0.812515506	0.713047959	0.925786479	0.828570883	0.906717473	0.694486944	0.823626449	0.862427398	0.718908846	0.483492893	1.090961266	0.822698188	0.642534069	0.872824641	0.956206813	0.707972894	0.730660846	0.675282136	0.864810664	1.081907908	0.855102041	0.923664032	0.830533601	0.822614132	0.971208874	0.669467165	0.771542713	0.783978418	1.135718021	0.748795052	1.805515108	0.802635631
Q9V416_BG:DS04929.1	1.080981413	0.927364479	0.888397954	0.913184454	1.098426725	1.209971686	0.93052706	1.032496168	1.083056243	1.131918406	1.095767009	0.982997288	0.997166082	1.088820941	1.106868521	1.266636836	1.009172944	1.174631852	0.962315926	1.179267794	1.196584401	0.961240144	0.926529825	1.026075591	1.061942921	0.95142698	1.131066468	1.138508317	1.212843993	0.933413786	1.007204847	1.058925355	0.905214157	1.066247164	0.952777503	1.119155876	1.08385638	1.025897005	1.015036572	1.000803104	0.962995453	0.935363369	0.92004377	0.921458758	1.040954112	1.180126374	0.958860407	1.10420299	1.104364443
M9NF32_BG:DS09217.4	1.094489763	0.964322744	1.061860564	1.000499681	1.070167768	0.932068306	1.083348757	0.893531371	1.083379604	0.924347585	1.048136838	1.18625455	1.152703662	0.98232728	0.881302628	0.972669169	1.076179365	0.857199739	0.91241946	1.086530804	0.952689495	1.177872798	1.138832084	0.913779926	1.071182169	1.008717027	0.979112402	0.960128231	1.113470914	1.015711614	0.903765391	1.09791162	1.019264122	1.020711798	1.092453113	0.987646586	0.948434372	0.940480244	1.013565601	1.068413669	0.952792798	1.119656704	0.93534233	0.963048818	0.937068386	0.91199785	0.930296923	0.956496037	0.806828535
Q9VJK9_BG:DS09218.3	1.05628034	0.92961165	0.930066748	1.023665049	1.087226942	0.986650485	1.031416143	1.11358144	0.897776704	1.016191397	1.18221363	1.467617206	1.08567153	0.995884774	0.928170595	0.89936401	0.888514777	1.028643639	0.934288121	1.053074979	1.352148273	1.413986957	0.892736676	0.836743872	1.291882168	0.940409265	1.024532225	1.218711019	1.343866944	1.01954262	1	1	1	1	0.944860449	1.07601543	1.118221012	0.948037214	1.18221012	1.14023145	0.849103699	1.143217347	1.03681291	0.930912758	1.201376554	1.117007105	1.030861456	1.069937833	1.3152
B5RIV0_bgm	1.214899403	1.293047595	1.607583325	1.212086083	1.249551277	1.140637132	1.395482306	1.011834838	1.293147483	1.0950995	1.256129277	1.313146898	1.321871675	1.219354159	1.083335006	1.128550922	1.222340447	1.036061615	1.170781866	1.181170477	1.422781972	1.626169079	1.59664383	1.187384535	1.427257332	1.116263182	1.103607648	1.082286447	1.426816852	1.219814006	1.157482624	1.451225354	1.240710871	1.097910985	1.575382634	1.282882759	1.388667211	1.096565973	1.295163844	1.322650629	1.17973161	1.541541358	1.176532616	1.192150639	1.136947582	0.97581218	1.087851561	0.935625882	1.130279881
Q7KM15_bic	1.263467724	1.029226574	1.095770482	1.123179226	1.190184656	0.902317499	1.225476063	0.911279404	1.01468368	1.053737885	0.908230653	1.157911654	1.15326481	0.98290328	0.969779021	0.910432606	1.183521417	0.931577562	1.028565458	1.009960375	1.07394824	1.150564072	1.229938324	1.107761046	1.133730658	1.164700817	0.898358114	0.731564247	0.989275197	1.350314272	1.004775656	1.014781792	1.161291015	1.035682258	1.167969015	1.045933274	1.08592529	0.941657607	1.093794591	1.180178535	1.006994462	1.110455836	1.024805828	1.010536183	1.07429113	0.893389201	1.139568602	0.832686596	0.97524114
M9PDL9_BicD	1.106416695	0.883280591	1.020097952	0.98508213	1.080291272	0.998736098	1.093248667	1.015384042	1.063487132	0.996023511	0.969020665	1.422539237	1.132385496	0.948784171	0.929461329	1.007567827	1.04501227	0.931695246	0.883625693	1.033856733	0.990079495	1.160678135	1.07257872	1.001391153	1.101118113	0.988715052	0.99532107	0.985642327	1.176082982	0.953934555	0.891313458	0.96368598	0.954221645	1.012407886	1.120751466	1.02754839	1.093035142	0.926583868	1.101753079	1.150110617	0.928723195	1.181416628	0.911500231	0.924252286	1.133165887	1.029896097	0.91264782	1.100193149	1.009601024
M9PHA0_bif	1.102120867	0.906993539	0.937932345	0.96950209	0.966963132	1.0581832	0.956641841	1.113866675	1.035406874	1.053415542	1.045616873	1.122809963	1.10120583	1.09201091	0.986843242	1.033558372	0.999419918	0.99713912	0.871270201	1.118657934	1.050192766	1.09764876	1.017360007	0.972427017	1.078699384	0.98363463	1.053252594	1.098209473	1.248989355	0.943858644	0.924965531	1.030365335	0.969521782	1.050748651	0.993185825	1.008782539	1.072268203	0.898704358	1.05625252	1.027406898	0.89007992	1.063737624	0.86150013	0.918194698	1.107809199	1.040655172	0.874893551	1.11159159	0.986746148
Q9VEX9_Bin1	0.806905903	1.291042213	1.291982283	1.02100696	0.81869294	0.710729459	1.209832707	0.860361898	0.966814612	1.008398771	0.932400137	1.366063503	1.29406084	0.931346297	0.822176375	0.842807603	1.00570651	1.032631728	0.821302444	1.22044074	1.069077553	1.285228817	1.173085637	0.907159039	1.172677843	1.026687812	0.820570375	0.806681764	1.037136501	1.054091428	0.886336042	1.091155319	0.990426824	1.02811245	1.072002886	0.802752294	0.765539635	0.93784146	0.926760128	0.951396763	1.011854448	1.156095078	1.032704379	1.010725528	0.954308178	0.729151898	0.938341819	0.791196752	0.761137798
A1Z9S1_Blos1	1.068792811	0.927450836	0.957133387	0.990940561	1.085585917	1.030861015	1.39445629	1.454157783	1.771855011	1.560767591	1.198294243	1.47761194	1.10841098	0.933014354	0.855200201	0.911105515	0.95127172	0.981343739	0.866967443	1.113278868	1.092061944	1.127721335	1.092888244	0.995283019	1.158744557	1.027213353	1.08008658	1.03982684	1.335642136	0.988023088	0.948838496	1.188329646	1.098727876	1.102876106	1.03151074	0.994940529	1.302236819	0.908751997	1.066927037	1.073584236	0.872891887	1.054913295	0.882714898	0.893809435	1.110593714	0.980836393	0.992656936	1.006895317	0.9473945
Q9VTE0_Blos2	1.161262626	0.96040404	1.01469697	1.088434343	1.114292929	0.978888889	1.053910654	0.934956654	1.008574542	0.999621015	0.988109337	1.114500924	1.130110063	1.149371069	0.986766247	1.112945493	0.927541929	0.963423241	0.89521004	1.090153119	1.018687287	1.128752788	1.10027449	0.984731515	1.163664436	1.091010465	1.069817579	1.033001658	1.32172471	1.002155887	0.923511094	1.017224601	1.064032698	1.161444142	1.032159577	1.205984124	1.129316779	0.950267996	1.146075039	1.22260669	0.941108623	1.123404975	0.840683703	0.867050262	1.092548927	1.04138175	1.002122141	1.080759255	0.944761452
Q9VTC2_Blos4	1.081215681	0.819307879	0.957859788	0.910611672	1.019026944	0.952241093	0.959387625	0.984265363	0.986816925	0.950669785	1.061875399	1.138847544	1.317719569	1.232357473	0.907858243	0.949152542	1.017257319	1	1	1	1	1.179459749	1.007756085	0.85397165	1.121155389	1.013640011	1	1	1	1	0.927315358	1.087338804	1.012309496	1.279601407	1.02543593	0.992481203	1.119980803	0.832666773	0.996640538	1.072148456	0.925291953	1.218832194	0.95107838	1.025512888	1.551813472	1.466321244	1.297927461	1.718911917	1.114668219
Q8IQQ7_blot	0.863865076	0.818114051	0.737979873	0.761740589	0.836563548	1.028233321	0.818076477	1.105446118	1.216685979	1.019698725	1.118192352	0.758980301	1.048882035	0.990439476	0.937856592	0.981187355	0.965150347	1.179423683	0.948446646	1.2476362	1.263619991	0.95709571	0.776756247	0.975011787	0.844884488	0.819189062	1.190084227	1.184532925	1.147779479	0.859686064	1	1	1	1	0.886548957	0.978683788	1.040577849	0.998651685	0.912873194	0.990882825	0.936950241	1.023041475	0.948650428	0.969716919	1.02112	1.0864	0.984	1.2208	1.027662319
Q9VF08_blp	1.030891191	0.938713082	0.93770061	1.004222227	1.098985373	0.965737489	1.031323302	0.959780925	1.067946448	1.039167958	1.03043815	1.127461828	1.086325547	0.989864612	0.911877044	0.870844532	1.082564303	0.907187013	0.952583181	1.080483586	1.058701646	1.144663554	1.106780381	1.01059957	1.188502553	1.080603044	0.935117635	0.924496511	0.922247021	1.006669078	0.893473761	1.030378668	0.976305857	1.022208694	0.954487186	0.974928203	0.974322028	0.850721945	1.085937733	1.083642218	0.919815961	1.010255334	0.962204766	0.954178852	1.179866678	0.905478528	0.999123814	0.943651799	0.919363753
P35381_blw	0.91538128	0.879439264	0.83018997	0.910378959	0.935805336	1.079579374	0.856743749	1.183109456	0.949094237	1.082628641	1.092477229	0.864184398	0.837232572	1.003205184	0.993978362	1.004842262	0.845462338	1.086135956	0.925257806	0.906092886	0.923566415	0.872390514	0.839644242	0.966611697	0.938154284	0.802195572	1.080105974	1.04397038	0.884941985	0.93312561	0.923062474	0.931281893	0.878227588	1.040131635	0.844214386	0.947777698	0.99023444	0.975831695	0.945070484	0.892138972	0.931652213	0.81612188	0.894773475	0.858609567	1.005243981	1.046735947	0.871281155	1.101183129	1.067733106
C6TP33_bma	1.002375065	0.954548412	0.946479698	0.98949115	1.026125716	1.188183238	1.049060064	0.871618524	1.137398747	1.043252331	1.081613939	1.208925569	1.055057365	1.092113939	1.15508374	1.151918766	1.072530661	1.14905706	0.951523211	1.146397485	1.164530948	1.027797623	1.018315256	1.02987595	0.911865948	1.089822693	1.196833707	1.178259786	1.204437796	0.957242583	0.953956327	1.054213526	0.938171365	1.14660346	1.005320936	1.036406408	0.990646354	1.012602218	1.048504537	1.084854934	0.926571077	1.0490009	0.916867687	0.957983798	1.036679338	1.127093394	0.981249358	1.234871057	1.173009274
Q7K566_Bmcp	0.925286067	0.967976829	0.849021967	0.974891386	0.895343382	1.159075611	0.903619399	0.980928945	1.035988926	1.077565877	0.920742336	0.902081411	0.935614069	1.058192923	1.284259081	1.237854229	1.079484058	1.252650797	1.184467383	1.004774946	1.041359455	0.951540086	0.950447826	1.01376247	1.024648657	1.086579771	1.174789487	1.163919367	1.153406481	0.933197244	1.129915639	0.966601774	1.105710578	1.037724421	0.945203813	1.106773474	1.056438856	1.188825796	1.000932874	0.975157169	1.092537011	0.869516653	1.050145546	1.072535879	0.871571007	1.123839418	1.169154885	1.092688331	1.080299604
E1JI03_bmm	0.886359874	0.965072008	1.065883132	1.188048336	0.87361364	1.373199801	0.986526649	0.975827224	1.003368338	1.87358827	0.897166634	0.818506043	0.821561338	1.055042571	1.450773474	1.506055882	1.098812807	1.373477673	1.322056834	0.531258457	0.772665765	0.831516937	0.954786451	1.587334315	0.886450663	0.956848306	1.438518091	1.50554995	1.149920715	1.189995675	1.366930446	0.913091767	1.136887408	1.802165764	1.017860465	0.984465116	1.035906977	1.305116279	0.89944186	0.84344186	1.276930233	0.691055546	1.160429602	1.061000168	1.188344988	1.496969697	1.449417249	1.047785548	1.558165087
P29746_bnb	1.012279435	0.831734329	0.911761438	0.933942795	1.144197061	1.037062232	0.96910524	1.238988158	0.956911788	1.071351222	1.02367083	1.059604439	1.010776717	1.020711215	0.882638429	0.933560299	0.740023955	1.053116867	0.820837593	0.981740315	0.923822084	0.999575933	0.962686156	0.851357257	0.948690329	0.89029696	1.069796866	1.073640102	0.880878352	0.964519014	0.883238387	0.887296724	0.889827535	1.039037766	0.906890737	0.885957764	0.96886851	0.86818793	0.91143055	0.884487065	0.805443858	1.007476322	0.83364642	0.871584596	1.114060943	1.106103535	0.870636202	1.161184865	1.083140043
Q9VPD6_BNIP3	0.956184044	0.985310257	0.940818911	1.052511608	0.969945125	1.408104686	0.944444444	1.538720539	1.183501684	1.343434343	1.567340067	1.089225589	0.840253212	1.09551294	1.076335878	1.115434742	0.86296779	1.416309013	1.5527897	1.27639485	1.391416309	0.917937728	0.973654355	0.967225514	1.031387873	1.021429472	1.181895816	1.298346402	1.162953187	1.029888984	0.904483948	1.100026532	0.887503317	0.981162112	0.99244882	0.968788455	0.98310773	1.092068464	0.909441772	0.912518179	0.982100906	0.842846479	1.013087833	0.996068674	0.92588081	1.132871064	0.920680285	1.216220015	1.09798995
Q8T9B6_boca	1.020667841	0.935915268	0.929656189	0.993308194	0.999320001	1.012337856	1.016862426	1.162251425	0.949963174	1.096406559	0.916912819	1.034298562	1.020606394	0.998028123	1.007932451	1.036330848	1.005477436	0.995929655	0.931662176	0.969564601	1.007892498	1.042338449	1.004294416	1.03023786	1.000156532	0.974880049	1.028959942	1.050117069	1.146081641	0.963369672	0.981596814	0.937250142	0.955243694	1.000242746	0.957302862	0.952868038	1.053253127	0.954252347	1.006871209	1.025451159	0.949258765	1.019358366	0.92109145	0.954551409	1.047935388	1.089171538	0.995949298	1.102314509	1.014203499
Q709R6_bocks	1.033493834	0.884298297	0.897921315	0.943159131	0.996852613	1.122395772	0.984755412	1.185945909	1.093076777	1.113495181	1.101451783	1.087245419	0.990568126	1.046893681	1.029136961	1.165744144	1.045166718	0.999205689	0.939934942	1.017966563	1.055450488	1.049671232	0.966974179	0.947330937	1.017191977	0.961558209	1.073362125	1.082269695	1.149558478	0.89540354	0.948456748	1.04494382	0.949844321	1.071713822	1.019372264	1.066436931	1.067709789	0.973921952	1.040840086	1.067399336	0.954068486	0.992165413	0.923379175	0.984642292	0.99290207	1.053572989	0.884402027	1.105311435	1.050282642
Q8IMM6_BOD1	1.087125077	0.902060804	1.018975719	0.796368088	0.987145481	0.966333401	1	1	1	1	1	1	0.820181934	1.245821874	0.811296806	0.97778718	0.797969114	0.701086957	1.12173913	1.067391304	1.157608696	0.871829105	0.624833111	0.838451268	0.636849132	0.47129506	1	1	1	1	0.949712974	0.889322618	0.78576349	0.574971297	0.735549525	1.369810041	1.325644505	0.981818182	0.947964722	0.872116689	0.796472185	0.895546909	0.772070904	0.85715521	0.764933	1.144901204	0.935801348	1.132409721	0.813295165
M9PF25_bol	1.107001272	0.936644476	1.339329793	1.11676266	1.184905378	0.75839629	1.436080276	0.839545198	0.920679262	0.802960131	0.905265995	1.347251832	1.261356626	0.792730772	0.837959879	0.716189207	1.027783947	0.89767163	0.920415709	1.043769361	0.953132807	1.425356472	1.304079769	0.842923834	1.089359111	1.029913229	0.91067737	0.896448036	1.136682149	0.992965876	0.798345333	1.033661741	0.999905267	0.888909941	1.361188651	0.926681036	0.902406275	0.769902124	1.11458959	1.186530511	0.786155966	1.468299456	0.861055306	0.936126211	1.094766001	0.866744423	0.876476163	0.902099431	0.878891024
A1ZB62_Bom836	0.175738492	0.976758135	0.733843155	0.28520018	0.134053081	0.257909732	0.916996047	1.156126482	0.901750423	0.991812535	1.023997741	0.871541502	0.65792235	0.732423924	0.772298006	0.672612802	0.985659321	0.728564547	0.912090559	0.738198459	0.712668593	0.441866739	0.410439709	0.983949285	0.381440518	0.868626922	1	1	1	1	1	1	1	1	0.323642201	0.254169268	0.236243646	0.977436904	0.259787746	0.310532418	0.855346473	0.340574088	0.913110939	0.853633307	0.196155628	0.163270032	0.864289023	1.043538675	0.362658355
Q9V8F5_BomBc1	0.417431041	1.02006689	0.932613663	0.784098811	0.430510944	0.992748104	0.904966013	1.301554314	0.431960861	0.736589167	0.364809283	0.446205135	0.36230258	0.302062656	1.581815828	1.971174592	0.920816432	0.997860848	0.933178245	0.711294722	0.661292048	0.270085969	0.785050945	1.058400552	0.284679474	0.905964763	1.233613694	1.070102634	0.628218904	0.742265367	1.363844886	0.513977493	0.952619884	0.983191169	0.764350806	0.424176338	0.318755355	1.09475037	0.35427214	0.413311006	0.891074071	0.306107187	1.081055256	1.108890735	0.307284874	1.266695057	1.210854116	1.343030529	1.248091002
A1ZB61_BomBc2	0.921397425	0.838858005	0.696666598	0.456219389	0.808034884	0.490576371	0.618211755	0.723349295	1.568649073	0.430202873	1.352595961	1.507092252	1.49164565	1.418394254	0.626573025	0.673615323	0.562649641	0.520604761	0.740518583	1.079761588	1.039168976	1.634439104	0.535611413	0.637021862	1.264010366	0.582740175	0.540488032	0.496779263	0.33860049	0.503851069	0.726931368	1.336912792	0.513544657	0.540316092	0.28716211	0.634121679	0.646039489	1.064004199	0.618529725	0.428315606	0.951881069	1.407695808	0.680151393	0.685446009	1.016736735	0.47407458	0.649143795	0.506408723	0.335720383
Q9VD48_BomBc3	0.920153497	0.586650003	0.461969054	0.561741978	0.993469345	0.993715784	0.705392438	1.371777545	1.130925432	0.686725006	1.092103929	0.90554786	1.100806136	1.292478673	1.114659153	1.508674441	0.586679189	1.000324417	0.553779456	0.837644144	0.76007904	1.284375162	0.501959363	0.886840334	0.948417836	0.682893987	1.26932045	1.219142308	1.422447723	0.531962917	0.945600983	0.993822947	0.537744864	0.696232339	0.451150875	1.141106755	1.130406656	0.755760846	1.366675724	0.897837985	0.795637154	1.119386281	0.534778705	0.617206512	1.059216573	1.007054323	0.668595842	1.057080404	0.859433603
Q9VD49_BomT3	6.099612812	0.480816614	0.47624076	0.372404083	6.705033439	0.483280535	0.55133246	0.770642202	4.351245085	0.571428571	3.921799913	2.622105723	1.280233528	1.321100917	0.997497915	0.959132611	1.17764804	0.838668374	0.728553137	2.696542894	2.805377721	6.845486111	0.052951389	0.460069444	6.923611111	0.230902778	1.015277778	1.083333333	3.29375	0.888888889	0.945429741	1.85675307	0.927694407	1.744884038	0.446556474	5.735812672	5.1184573	0.406336088	5.944077135	4.422038567	0.487603306	1.894849785	1.311158798	1.21888412	2.425615412	0.893685337	0.798430253	0.899750268	0.306322351
A0A0B4KGE5_bon	1.105117748	0.915493575	1.045476472	0.995044512	1.062798755	0.988817261	1.043568349	0.849806798	0.985775886	0.941535532	0.96001568	1.135689086	1.201532684	1.057501015	0.982592367	1.01502233	1.098964677	0.904257446	0.885168899	1.044673196	0.894363382	1.260003201	1.159170935	1.091549296	1.131001921	1.050496159	1.013389457	1.001964322	1.245339747	0.980076168	0.886916836	1.05440452	0.977397856	0.973630832	1.026821862	1.021038172	0.96641845	0.885989011	1.049920474	1.087080682	0.85204598	1.154899491	0.857205455	0.941337569	1.034153332	0.968951517	0.903272032	0.916885598	1.04357022
Q9VCY7_bond	1.011784288	0.903462051	0.980359521	0.990412783	0.991344874	0.870905459	1.02970101	0.73618903	1.214903307	1.045211537	1.166325655	1.259454821	1.170887864	1.140099802	0.962527069	1.059881367	1.065624706	1	1	1	1	1	1	1	1	1	1.133834233	1.075839399	1.212960789	0.93026532	1	1	1	1	1.099938208	1.021709578	1.095283213	0.961441813	1.077775489	1.143069001	0.964284243	1.145476666	0.815503607	0.947075693	0.940164447	0.957994459	1.02252212	0.899499508	0.963107881
Q8WTC1_bonsai	0.975522743	1.137383147	1.52964688	1.155584184	1.093218379	0.722326826	1.378163772	0.718064516	0.957717122	0.841538462	0.833300248	1.458511166	1.255319877	0.845535409	0.875401984	0.744474855	1.221621622	0.763675869	1.06475801	1.043669052	1.0032379	1.387232707	1.576321334	1.090420048	1.052046443	1.233155512	0.980630772	0.865158867	1.212513695	1.161058069	0.900175555	0.966341788	1.154367698	0.854107391	1.437741851	0.943831161	0.943570021	0.927426821	1.105548038	1.159556537	1.00026114	1.281263026	1.108447964	1.111817424	0.903154088	0.814756625	1.025108199	0.729560681	0.849297087
Q9VEX6_bor	1.013311328	0.926217653	0.933437585	0.912226508	1.02234539	1.226188573	0.947106609	1.200150153	1.002358648	1.003783995	1.053144176	1.000899969	0.980551018	1.008606839	1.001688599	1.060587265	0.986854006	1.018822866	0.920140117	0.989937552	0.998233107	0.984563724	0.972386889	0.917383045	0.989408408	0.958068861	1.020113199	1.057377608	0.993946632	0.899990033	0.961605335	0.978104379	0.938200641	1.006083158	0.95521698	1.003599065	1.020173998	0.958092902	0.991640404	1.031688786	0.933252697	0.98850172	0.895882421	0.93139265	1.008801124	1.114357855	0.92323741	1.219945546	1.038301651
Q9VYT1_BORCS5	1.296232067	0.912659625	0.939776131	0.938514898	1.292290714	1.049345735	0.945356228	1.020206811	1.024570724	0.990418366	1.073048098	1.164690257	1.152226929	1.083301245	1.027339238	1.074701579	0.94352458	0.980244793	0.819196908	1.240140291	1.208646482	1.338401177	1.189063266	0.752247834	1.215792055	0.969592938	1.020888559	1.080903404	1.341215142	0.967447779	0.913960861	1.176997923	0.907838636	1.068875041	1.048493648	1.169945554	1.152885662	1.004500907	1.132268603	1.316805808	1.016479129	1.193363346	0.864289863	0.950624455	1.117404737	1.004119464	0.977136972	0.839546859	1.080853305
Q9W0Q3_BORCS6	0.933127816	0.974863647	0.95873844	0.953640028	0.992174532	1.005928385	1.036944128	1.063397948	1.060661345	0.957126568	1.076624857	1.006385405	1.207682119	0.931390728	1.015099338	1.117615894	0.932980132	1.093822573	0.910822109	1.306084533	1.204598235	1.28049922	1.064274571	0.968174727	1.219344774	1.068330733	1.024986057	1.034132738	1.23781372	0.98951478	0.826510721	1.194931774	0.904483431	0.994152047	1.039207842	1.082616523	1.083016603	0.843568714	1.147429486	1.091218244	0.811362272	1.061710037	1.018587361	0.90260223	1	1	1	1	0.93611206
P22815_boss	1.10715981	1.055595654	1.067933987	1.162670932	0.97695869	0.858120542	1.22651306	0.778143648	1.016428654	0.944903508	0.932510273	1.156736399	1.246007591	0.974669636	0.941362556	0.926851483	1.103026355	0.917140327	0.965385576	1.084925867	0.997328328	1.141469639	1.226611007	0.96377126	1.127374811	1.117483639	0.9642407	0.905132638	1.150398751	1.066599743	0.900690703	1.003694542	1.069102015	0.984338659	1.209282579	1.005529943	0.862128476	0.91534038	1.042452425	1.020921208	0.948753004	1.165969818	0.954344903	1.008185701	0.960708317	0.880344517	0.953130222	0.812048464	0.941579812
Q9W3T7_bou	0.45033986	1.490717257	1.127320686	0.731256975	0.43400629	0.519833621	1.004622222	0.920977778	0.936444444	0.9248	0.970844444	0.955911111	0.836889332	0.670987039	0.93998006	0.745363908	1.211565304	1.003688737	0.811466597	1.062430489	0.978238304	1.003849306	0.970869446	1.026547793	0.876375196	1.01373333	0.989662623	1.091640352	1.093634702	0.945753698	0.947650121	1.036952856	0.927047437	1.01048464	0.86322105	0.770165876	0.785694679	1.048743187	0.713462217	0.8245559	1.11258382	0.709029536	1.188804501	1.092995781	0.502629137	0.53232292	1.120630993	0.84472626	1.047352995
Q2PDQ6_BP1011	0.422502489	0.78705609	0.69996681	0.557583804	0.421639562	0.661267839	0.574205351	0.850445918	0.593642808	0.572833295	0.650354448	0.51017608	0.653472304	0.556622555	0.78182457	0.614474763	0.826092048	1.391871166	1.037576687	1.374233129	1.336656442	0.725207756	0.663850416	1.134487535	0.631578947	0.932271468	0.707978846	0.752586802	0.560128765	0.67325822	0.996999454	0.853791598	0.909983633	1.000545554	0.483558793	0.461238293	0.484547347	1.166961498	0.472736733	0.514099896	0.913059313	0.409278724	0.859659297	0.749546937	0.599203338	0.55538695	0.976100152	1.000569044	0.57406953
Q7JVP4_Br140	1.248366013	0.830065359	0.983660131	1	1.464052288	1.241830065	1.119944694	1.525406153	1.425509851	1.472174214	1.386795714	1.543380574	0.862446744	1.039967539	1.088861838	1.018259282	1.045242443	1	1	1	1	0.956603774	0.816981132	0.930188679	0.860377358	0.866981132	1.16474769	1.140298507	1.281734186	1.034115139	0.907292048	1.021619641	0.905459875	1.203371198	1.202590194	1.272895467	1.072155412	1.047178538	1.073080481	1.123034228	0.949121184	1.113207547	0.99245283	1.071698113	1.147657841	1.025458248	1.082484725	0.82586558	1.127155172
Q9VAM5_Brd8	0.979871595	1.015616866	1.06125282	1.04008329	0.993926774	0.930418185	0.885061392	1.055252387	1.005457026	0.896657572	0.971691678	1.024215553	1	1	1	1	1	1.089197225	0.922695738	1.120911794	1.221506442	0.949342289	1.018471872	1.242933109	1.183319339	0.946263644	1.050832603	1.198948291	1.133216477	1.101665206	0.964050855	1.059622972	0.760192898	1.010083297	1.268352365	0.915171289	0.998368679	0.94045677	1.16721044	1.163947798	0.836867863	1.071566731	0.983558994	0.867988395	1	1	1	1	1
X2JGB3_Bre1	1.174633599	0.864355672	1.121362287	0.992216171	1.119258549	0.88083495	1.090926402	1.022422165	0.966628582	0.935161382	0.939921927	1.130914977	1.275075904	1.042285399	0.901462876	0.997957494	1.007673199	0.989858352	0.889531473	1.055988601	1.00142486	1.238735853	1.096376966	0.945832444	1.074524877	1.046124279	1.030966674	1.008031463	1.165348789	0.983730077	0.935806623	1.019567912	0.907561537	0.926244023	1.11554636	1.03532957	0.926080014	0.842017676	1.167045225	1.263183934	0.889131266	1.135281792	0.859882878	0.929350454	1.094665373	0.984933721	1.066666667	1.139152926	0.918241824
P25439_brm	1.092868064	1.007652389	1.135039053	1.063373227	1.130904051	0.986924659	1.215649347	0.852477053	1.001893226	0.932210614	0.955980017	1.243621513	1.197680615	0.984658963	0.970579987	1.01283094	1.092256563	0.961705747	0.889296562	1.118600413	1.02527032	1.228461814	1.171550113	0.944579175	1.096052161	1.009144038	0.992726764	1.010804951	1.158542555	1.026586941	0.907635592	1.046939703	1.020528229	1.001843248	1.228587362	1.084040291	1.023895995	0.968073612	1.127956502	1.148611063	0.953281517	1.231638472	0.933553297	0.987870234	0.999782467	0.957827569	0.959770865	0.900717859	1.005674456
Q9VYI2_Brms1	1.183522088	0.882376316	0.915292403	0.96456719	1.161865024	0.938737665	1.045524691	1.16404321	1.064506173	1.01882716	1.07191358	1.113888889	0.895610913	0.871490708	0.877224199	0.957888493	0.772835113	1.05829435	1.008996042	1.139618568	1.156890968	1.00829646	0.926438053	0.952986726	0.816924779	0.919247788	1.082619987	0.872847937	1.032701741	0.870058671	1.015861306	0.82958318	0.988196238	1.045001844	0.962356322	0.909578544	0.944827586	0.802873563	1.045498084	1.033045977	0.832183908	1.133524162	0.910843576	0.943845765	1.037553118	0.975886945	0.936357348	1.069967388	0.959923233
A0A0B4K7K9_brp	0.931398034	0.883996818	0.814217729	0.842379318	0.897663273	1.043638409	0.830984387	1.175341325	0.895798453	1.054253983	0.955800793	0.857850001	0.830837471	0.925682696	1.024117144	1.097360936	0.924005331	1.056236476	0.880447952	0.900170663	0.913405148	0.834974666	0.867445065	0.936889436	0.928647552	0.978302676	1.004612545	1.094371715	0.909246272	0.88862311	0.918857742	0.880101684	0.86809472	1.048554868	0.826910674	0.871406346	0.90929383	0.952511481	0.888399061	0.845530661	0.931965321	0.863706755	0.869720823	0.902772018	1.00838875	1.082281048	0.921188527	1.149537587	1.036951592
Q8IP90_bru1	1.200488349	0.945803917	1.045437656	1.100695366	1.146079941	1.043473645	0.706431535	1.380705394	0.979771784	0.820539419	1.934128631	0.94346473	1.166717464	0.989637306	0.982627248	1.067052728	0.900030479	0.733691481	1.019953952	1.39524175	0.89409056	0.970969734	0.785052502	1.015132798	1.06732551	0.789993823	1.043286867	1.443690389	1.476338958	0.972120323	0.935692034	1.049287939	0.948486871	1.067757009	1.088322813	1.047069432	1.104824166	0.957078449	1.040577096	1.349458972	0.972813345	1.019973232	1.059919695	1.052198085	0.936226749	0.784765279	1.020372011	1.251550044	1.193548387
Q9VH01_Bruce	1.086654262	0.985441757	1.068599587	1.067311428	1.086695156	0.990430818	1.075172757	1.043360518	1.031999004	1.062908548	1.032465915	1.068262467	1.185053381	1.119572954	0.994823682	1.152183759	1.021934649	0.99651036	1.043838604	1.044601963	1.028026172	1.153557604	1.132287801	0.946167046	1.055987869	1.058581747	1.031146343	1.060606061	1.144824872	1.026142688	1.007203862	1.084663944	0.998960267	1.0507241	1.156599815	1.033934715	1.032273223	0.927095746	1.098330117	1.134245196	0.912041621	1.180637544	0.94551705	0.936141399	0.975042569	1.05332036	0.938506446	0.957966432	0.925355084
Q9VIL0_brun	1.111565393	1.057615489	1.047276658	1.000986888	1.087175149	1.149631092	1.112502847	1.116602141	1.227814469	1.126470812	1.271995749	1.224929781	1.037502201	1.061095135	1.010094489	1.144961559	1.023006045	1.068612207	0.880556552	1.08292469	1.095881673	1.057863501	0.996062543	0.990356083	1.095640265	0.947557635	1.04441469	1.073259373	1.225325172	0.936381025	0.961600928	1.008294664	0.95812065	1.044721578	1.081663135	1.147903713	1.141512383	1.029177811	1.133557956	1.138038834	0.971551634	0.987096223	0.939981769	0.986697431	1.065332523	1.172035076	0.981637437	1.146032297	1.034708031
Q9VC96_BRWD3	1.147482014	1.040596095	1.172147996	1.032374101	1.005652621	1.008221994	0.768757688	0.626076261	0.980319803	0.741697417	1	1.137761378	1	1	1	1	1	1.023593466	0.908802178	1.470054446	1.323956443	1.299714169	1.247447938	0.937117191	1.158840343	0.921600653	1.092330603	1.117647059	1.159344751	0.988830975	0.86443662	0.858714789	0.823943662	0.893045775	1.057999562	1.148172467	1.119719851	1.02757715	1.066316481	1.128255636	0.969577588	1.266666667	0.757608696	1.00326087	1.027736686	1.162352071	0.996671598	1.103550296	1.03903016
Q9VMP1_bs11h10.y1	0.815661104	0.656739409	0.743003851	0.660333761	0.78279846	0.92605905	0.785237534	1.07008245	0.916372203	0.83765214	1.012171182	0.830781311	0.683515221	0.946582424	1.404365307	1.004020678	1.126938541	1.148837209	1.133192389	0.894926004	0.983298097	1.051361868	1.13385214	1.289105058	1.091439689	1.282879377	1	1	1	1	1	1	1	1	0.707049656	0.729702791	0.749003262	0.755255527	0.621330192	0.599311345	0.725625227	0.558855886	0.735836084	0.644526953	1	1	1	1	0.964603844
Q9VX02_bs13c01.y1	0.959286602	0.850595717	0.792741759	0.945215993	1.000201009	1.176302902	0.810992156	1.016379693	0.953525088	0.983916325	0.937244067	0.852681435	0.901738874	1.095608606	1.044916004	1.149896846	0.879988211	1.106278342	0.963083605	0.922015712	1.005492751	0.96469919	0.897175935	0.938733855	1.008465502	0.890818443	1.107524212	1.165925458	1.196085514	0.907262343	0.977160909	1.062716868	0.888808328	1.026956342	0.849136469	1.025041601	1.052215778	0.984296493	1.002148731	0.951597008	0.927815565	0.83487953	0.928541236	0.956172551	0.982653551	1.14056692	0.937289807	1.095203176	1.03298483
Q9VJ86_bsf	1.002288871	1.06634367	1.515849554	1.156672388	1.075838133	0.821891014	1.547000198	0.761341039	0.934786631	0.861787263	0.853407854	1.484897228	1.545688479	0.918546323	0.937682026	0.892372927	1.181652181	0.929571028	0.984846165	1.069823359	1.019014899	1.537748049	1.606949767	1.059282977	1.060589034	1.095026904	0.998177811	0.917982063	1.070516783	1.102379203	0.929921185	0.953663149	1.098954388	0.884787888	1.568555313	0.914220118	0.917816955	0.908916981	1.059106885	1.202514101	0.930211729	1.517772764	0.990971797	1.025737309	0.901718771	0.836613082	0.961173867	0.774820565	0.87959124
Q7KTJ7_Bsg	0.984798205	1.001287363	0.943376245	0.956255937	0.978128979	1.057345244	0.95936102	0.963959828	0.927602367	0.966001669	0.969105491	0.918193848	0.97842136	0.979028603	1.042985149	1.063411462	1.012369586	0.958317603	1.002528663	0.855367074	0.825144739	0.872782702	0.941819665	0.995562978	0.870002039	0.880161558	0.894903233	0.958762189	0.818247736	0.996585269	0.969617057	0.942383325	0.957497051	1.035186579	0.95105397	0.948697741	0.930790804	1.074749952	0.917737055	0.843190157	1.040978679	0.863255331	1.059150054	1.066066072	0.902196725	0.98641417	1.055221121	1.086340648	0.976232218
M9PC27_Bsg25D	1.090633507	0.99115318	0.988245484	0.944444444	1.058834447	1.101398169	0.970386619	1.138469975	1.061968741	0.88648204	1.062791335	1.033177954	1.280167015	1.053444676	1.015866388	1.09039666	1.134655532	1.113842663	0.852496218	1.113086233	1.08698941	1.63164557	1.074683544	0.826582278	1.070886076	0.821518987	1.109467456	1.09754068	1.259615385	0.987518491	1.085985581	1.078248637	0.973272376	1.105327941	0.896565602	1.126375101	1.090555406	0.915347464	1.159645828	1.135900188	0.899919506	1.027804974	0.966614451	1.027804974	1.053278407	1.043254377	1.024785445	1.156608308	1.130738523
E1JHD6_bsk	1.103239381	0.975259544	1.037418977	0.997425759	1.085358428	1.018643976	1.096309297	0.933286777	1.05413072	0.950516649	0.980681284	1.15221368	1.112328716	0.996939449	0.969189838	1.047629236	1.071704327	1.025676964	0.930940122	1.170194508	1.005406178	1.119063254	1.11163088	0.896516257	1.057465787	0.987901328	1.042752575	1.046300956	1.200416632	0.984825416	0.923330185	0.944496915	0.967543759	0.993026807	1.096486076	1.009624953	0.972593354	0.98371099	1.039633599	1.022276057	0.968262125	1.11530526	0.963436496	1.007906308	1.017255361	1.013137012	0.945146604	0.961382514	1.037859062
D1YSG0_bt	1.001248116	0.92741623	0.897640735	0.969535356	1.024570609	0.906077024	0.925843916	0.930474619	0.98944987	0.953164618	1.115263333	1.020331355	1.022256198	1.007931505	0.962959911	0.945899765	0.969714911	0.926548048	0.941238546	1.018747474	0.964391325	0.967604044	0.942792107	0.984162357	0.979578863	0.983005229	0.945553828	0.948134377	0.973109678	0.93068934	0.924246068	0.995377426	0.929965779	0.994900793	0.906984843	0.994001614	0.988023338	0.932819573	0.964744905	1.009652727	1.005990467	0.948314579	0.934177306	0.930725596	1.048250877	0.943092088	0.973256004	0.944727868	0.93329108
A0A0B4K657_btsz	1.022065664	0.944344407	0.92186609	0.931469644	0.968488341	1.160829507	0.89009716	1.05959143	1.053973592	1.085563029	1.103961136	0.988527653	0.918895187	1.093206635	1.036792322	1.150038253	0.919764571	1.122876789	0.952908381	0.984828099	0.986679056	0.901063442	0.916832751	0.8764829	0.947637101	0.622091019	1.065637781	1.136449727	1.022624962	0.928824353	0.96604963	0.949744149	0.898068687	0.996599349	0.976472171	1.02464271	1.024037214	1.012667352	1.000586274	0.9740598	0.975732121	0.937231331	0.924635109	0.988778366	0.994862689	1.04473598	0.919044253	1.077645801	1.109423366
Q9VB04_btz	1.114686812	0.914044376	0.984281125	1.009532449	1.078966153	0.927116174	1.006146924	0.959402182	1.061408971	0.943994697	1.048090637	1.172254475	1.16636461	1.021500947	1.022324738	1.012768762	1.089216575	0.917530067	0.860936117	1.062164836	0.968813453	1.086951126	1.04187455	0.983890585	1.055476953	0.969692457	0.962144197	1.011541218	1.226448751	0.938223232	0.919432105	1.068678687	0.935981186	0.994861075	1.029106111	0.997296442	0.970221296	0.867275077	1.039208187	1.144383193	0.887545169	1.089078512	0.865338072	0.914213008	1.098953056	1.028769841	0.927473826	1.050151976	0.938252463
Q9VMS5_Bub1	0.82210109	1.063676908	0.960852329	1.060455897	0.780227948	1.078543112	0.913669065	1.33982226	1.108760051	1.272534913	1.198899704	0.976301312	1	1	1	1	1	1	1	1	1	0.737055838	0.965279188	1.197563452	0.729949239	1.252994924	1.168544194	1.270363951	1.043760832	1.094887348	1	1	1	1	1.106732348	1.033661741	0.976464149	1.131089217	1.119047619	1.008210181	1.238916256	0.656677524	1.049511401	1.120521173	0.909844055	1.235501949	1.200657895	1.427753411	1.396920176
Q9VAJ2_Bub3	1.084288604	0.964477411	1.114470668	1.077437626	1.085259609	0.87163857	0.996722618	0.848133221	0.959254174	0.905088799	0.873156473	1.128127906	1.162912266	0.895559388	0.924364087	0.980006467	1.173879069	0.789098148	0.736121633	1.448723595	1.045083772	1.233020335	1.161875684	0.981047295	1.055331528	1.036810876	0.955329187	0.916663092	1.150847094	0.974973193	0.879943101	1.083804105	0.947002642	1.016053648	1.137984075	0.997783207	0.891105682	0.827429425	1.073448245	1.293408433	0.859391965	1.022090358	0.937333629	0.942879326	1.035915854	0.862942535	0.915726013	0.897361895	0.924213587
Q7JXE1_bug	1.303972366	1.455958549	1.238341969	1.310880829	1.336787565	1.003454231	1.101370572	0.747866563	1.079648306	1.051202483	0.995345229	1.090768037	1.162365591	0.934946237	0.930107527	1.105376344	1.016666667	1.231649832	0.975757576	1.157575758	1.42020202	1.117511521	1.201382488	0.992626728	0.931336406	1.079262673	1.099105299	0.969717825	1.254645561	1.000688231	0.944363636	1.012727273	0.922909091	1.162181818	1	1	1	1	1	1	1	1.292606516	0.885964912	0.999373434	1.054597701	0.642241379	0.908045977	0.706896552	1
X2JED0_BuGZ	1.212073946	1.090236857	1.249335644	1.13084922	1.29202773	0.870017331	1.293614699	0.978715663	1.164453338	1.046752774	1.067309442	1.280516645	1.122612933	0.951797708	0.878308969	1.024496247	1.02120374	1	1	1	1	1.257918552	1.042232278	0.803921569	1.460030166	0.900452489	0.958440722	0.978522337	1.250107388	0.993771478	0.785873757	0.896488736	0.88309316	0.916582099	1.233985131	0.998981566	0.948416336	0.884509624	1.152510439	1.187850087	0.973520725	1.23317871	0.894553106	0.937879585	0.980006777	0.96701683	1.107082345	0.959222862	0.945121951
Q9VRX1_Bulli	1.095598164	0.962887234	0.994637553	1.027583812	1.07426411	1.202808534	0.951754386	1.089831059	1.022620208	1.103923002	1.020102339	1.01084308	1.084434466	1.051786963	1.091795797	1.20486584	1.078987081	0.848780488	0.832439024	0.980487805	0.921463415	1.09208083	1.030092845	0.927525942	1.062971054	0.951064992	1.07310557	1.174384715	1.271939767	0.963649611	0.993927945	1.013898259	0.867224396	0.914991229	1.166646851	1.169777672	1.154519875	1.051638727	1.155986209	1.122894622	0.995918044	1.13142418	0.946200628	1.01607298	1.004333694	1.121455524	0.972615534	1.100384802	1.085759714
Q24523_bun	1.059420953	0.906315647	0.949896659	0.96894694	1.03486481	0.960942265	1.000582931	0.974396439	1.014868538	0.96358571	0.992792847	1.106108668	1.169757182	1.002678048	0.975706275	1.035089607	1.004327917	0.997753702	0.853334025	1.170269383	1.05501702	1.228790747	1.138673158	0.927604549	1.124698943	1.021444303	0.948321786	0.983088528	1.206321353	0.937667349	0.845833415	1.009641523	0.922574463	1.024289598	0.993624415	1.003484917	0.969512011	0.837467895	1.062919877	1.020949791	0.859414816	1.087670616	0.860067711	0.919443314	1.109988894	0.985751105	0.962680469	1.013976489	0.956039314
Q9VIE7_bur	1.078025931	1.124182758	1.241371713	1.125994841	1.102088264	0.892551466	1.296089118	0.732119596	0.951616065	0.844758407	0.877345462	1.15025769	1.218951228	0.901591581	0.898863409	0.862420097	1.201931793	0.900966837	0.990961259	1.056970691	0.998322403	1.213845905	1.345956136	1.007616601	1.0546005	1.156627302	0.979834327	0.914811906	1.15370389	1.109358589	0.964174928	0.97567164	1.181949264	0.922402543	1.312264301	1.026572754	0.992405598	0.938911132	1.089234989	1.140629592	0.988371168	1.196870825	1.058367964	1.079901334	0.965829467	0.850843065	0.983036314	0.768670613	0.906934381
Q9VH72_BVR	0.935157706	0.921547801	0.8175523	0.979548697	0.86167255	1.179500797	0.843878502	1.218397378	1.083425316	1.303498407	0.965730822	0.879308669	0.814865478	0.961115073	1.073737439	1.127345219	0.994379254	1.142570896	1.090797277	0.851562274	1.077562263	0.84782506	0.851459627	1.114948553	1.092922046	1.009485962	1.156019848	1.118274872	1.184262264	0.961911746	1.070152797	0.881628679	1.014542186	1.138219907	0.813582928	1.021498705	0.99522673	1.071409127	0.948563904	0.928305996	1.150788476	0.797008514	1.100360272	1.038836969	1.059538608	1.152986621	1.242251093	1.096675889	1.27452145
Q9VQB3_BVRA	1.159764808	1.565807384	1.510279115	1.573240155	1.195810705	0.721610231	1.445740926	0.609629669	1.266654375	0.950476742	0.837501975	1.066575357	1.078992902	1.209941552	0.96305808	0.906109075	1.345719969	0.946922738	1.525924954	1.136452407	1.308490355	1.204846358	1.464666963	1.333234687	1.189084068	1.363448679	1.080100588	0.908250435	1.287933139	1.640021942	1.30467093	1.34026085	1.456440533	1.053238469	1.530066352	1.268308734	1.376590155	1.176380361	1.199754581	1.210748975	1.317120478	1.160988284	1.441267504	1.435628035	0.979984286	0.760692155	1.404229975	0.601041653	1.048690847
P12428_bw	1.495941398	0.939237955	0.904645345	1.041485934	1.9234715	1.191825201	0.960433647	1.069768669	1.491915275	1.155838675	1.467357759	1.345018596	1.46798473	1.504453894	1.090319377	1.203109966	1.039045284	1.180182492	0.990932421	1.614342743	1.498802395	1.425476569	1.073125752	0.929378421	1.512520868	1.002310052	1.108306518	1.168879259	1.626667529	0.957472956	1.014906391	1.241696489	1.022684925	1.066783	1.096593359	1.483775334	1.473210436	1.070410198	1.492763583	1.584573092	1.068065438	1.424476312	0.984424445	0.997684506	1.541618616	1.209412174	1.090978026	1.165842562	1.100823227
P39736_Bx42	1.104938629	0.938339509	1.126215841	1.084240389	1.140863826	0.960977304	1.06588976	0.949298575	1.003341434	0.865735115	1.008560698	1.166022313	1.227182228	0.963559677	0.94275909	0.919312585	1.11851619	0.866514743	0.862716663	1.098197638	0.987086527	1.140094471	1.123645457	0.967713254	0.952486802	1.012670186	0.990924236	0.943779994	1.258994952	0.986945819	0.83898551	1.070683843	1.005001005	0.93793396	1.084098856	0.949208795	0.914597286	0.824305103	1.060599775	1.133526937	0.862028092	1.22152112	0.89907189	0.914846693	1.090562898	0.819898237	0.878268105	0.909117092	0.901863636
Q9VHC3_by	1.035408236	0.873342145	0.821165226	0.971924759	1.033578038	0.99316726	0.829781958	1.084737045	1.041831224	1.029905031	1.034731534	0.941719172	0.920752509	0.999937308	0.962296187	1.012616698	0.969103457	0.964163217	0.937140359	0.984696475	1.012295272	0.907377534	0.876591032	0.966452422	1.010948222	0.946866988	0.991797102	1.02484485	1.225756823	0.889983226	0.963726101	0.934490153	0.963851886	1.001856821	0.840265171	1.016131707	1.029426134	0.916078368	1.020622947	1.038529635	0.965984016	0.890709273	0.881601713	0.894052941	1.156023182	1.02090603	0.946835906	1.024740833	1.027955823
P51406_bys	1.080082388	1.005687233	1.123489809	0.991699714	1.019920686	1.09240985	1.087615725	1.092714343	1.028981618	1.073661613	1.180732591	0.942841809	1.150616157	1.364217252	1.066636239	1.136010954	1.128708352	0.789346247	1.043583535	0.934624697	0.969733656	0.950161449	1.051242454	1.054611821	0.993822827	0.977397164	1.115112048	1.173625742	1.194694503	1.006320628	1.217991311	1.266802964	1.085612062	1.057500639	1.249293093	1.088926078	1.194529402	1.020716718	1.123203878	1.087714236	1.037682498	1.038569945	0.945186174	0.987464768	1.160538659	1.354667877	1.041609926	1.086851263	1.120477612
Q9W1X6_c-SP48	0.905815032	0.898391587	0.925610888	0.87673987	0.937983297	1.040828951	1	1	1	1	1	1	0.839679792	1.225659887	1.094764171	1.287105149	1.143444396	1.258259468	1.073327961	1.158340048	1.262288477	1	1	1	1	1	1.077276412	1.009997298	1.207511483	0.92839773	1	1	1	1	0.938121402	0.993720565	1.037022501	1.111721612	1.061486133	0.98992674	1.122579801	0.961148649	1.842905405	1.398648649	1.059025395	0.967055594	1.142759094	1.048043926	1.070721358
Q9VB66_c-SP8	0.860242291	0.792015419	0.927973568	0.920209251	1.252780837	1.018281938	0.876138121	1.064336025	0.832932486	0.835595259	0.791444769	1.037965985	1.304044821	0.966725881	0.931470347	0.952719322	0.85528833	0.987244806	0.870641373	1.096224029	0.9366215	1.047556966	0.872633488	0.835619544	0.852397687	0.883516608	0.947332023	1.002183883	1.122879814	0.860049501	0.738269667	0.901971045	0.805424734	0.921594279	0.924925951	0.849236728	0.936272499	0.912827523	0.906561859	1.00758715	0.942241969	1.174213264	0.782887198	0.786853936	0.95255754	0.927687533	0.831673989	1.085614092	0.934029194
Q9VJZ8_c-SPH166	0.876286302	1.048250629	0.891607592	1.023553625	0.912760119	1.520466499	0.731513083	1.011376564	0.992036405	0.995449374	0.814562002	1.018202503	0.92256453	1.018734388	1.18817652	1.160283097	0.87427144	1.579136691	0.821043165	0.70323741	1.01618705	0.791000372	0.70435106	1.061732986	0.666418743	0.942543697	1.535226078	2.10339993	0.82299334	0.865054329	1.185104053	1.293537788	1.093099671	1.077765608	0.685882097	0.703284751	0.797259082	1.337176419	0.686534697	0.738960191	1.050250163	0.612324078	1.11312286	1.105135032	0.64516129	1.62829912	0.973188102	1.545873481	1.699355185
Q9VL01_c-SPH35	0.796031233	1.106477015	1.112952371	0.781422722	0.814887021	0.707272757	0.913526438	0.980390764	0.826246755	0.673725919	0.718032518	1.036526848	1.122991996	0.84631334	0.850460187	0.873017831	0.924380056	0.715415652	0.961167136	0.894230817	0.802565859	1.018869535	0.926575968	0.94132846	0.821798845	0.959309255	0.641108923	0.768326471	0.706345959	0.831202101	0.962227835	0.956186095	0.970371503	0.780270367	0.72700415	0.620719069	0.634700097	1.030032283	0.648270194	0.642034612	1.007627148	1.005626631	1.151838431	1.027748094	0.733303952	0.711429446	0.972641728	0.934009777	0.674312611
Q8SXE1_c-SPH64	0.848513212	0.940264478	0.82372141	0.99623203	0.877624979	0.906352749	0.845820326	1.143195745	0.811076425	0.884321887	0.936408833	0.953289398	0.904569675	0.838042952	0.986436299	0.996447602	0.961730987	0.933872724	0.9757274	1.022794461	0.874046989	0.99551512	0.883905689	1.027934393	1.077908765	0.968221425	1.0257886	1.067625899	1.13702269	0.984726065	0.848544974	0.810405644	0.946502058	0.857069371	0.882601727	0.744724423	0.799839729	0.922268721	0.864571276	0.903125278	0.927032321	0.883232932	0.868323293	0.852710843	0.903287863	1.048268625	1.174711438	0.936516264	0.946223668
Q9W350_c11.1	0.929359781	0.944281355	0.960461841	0.931979979	1.028371188	1.09476154	0.966808204	1.070848664	1.000369227	0.942550844	1.107170304	0.980164778	0.994351649	0.978802562	0.921851576	1.071787581	0.963998207	0.987025172	0.866455827	1.070327557	1.032669672	0.99119638	1.004390561	0.904410488	0.960446384	0.934392296	1.038843018	1.087321466	1.138852453	0.929058156	0.927294438	1.025277423	0.922455713	1.01086675	1.015073152	0.952302372	0.939100786	0.967582517	0.940610113	0.968864727	0.913235222	0.975660862	0.893078874	0.929015317	0.964636264	1.068684759	0.905380296	1.179732716	0.96936539
Q9V3B6_c12.1	1.058008734	1.011116503	1.140279677	1.116326261	1.129471966	0.970532445	1	1	1	1	1	1	1.214787707	0.90281532	0.981619329	1.008067534	1.118476317	0.951812913	0.889540369	1.078986386	1.010917913	1.129666282	1.068310517	0.971988565	1.077546869	1.019132443	0.978490456	0.927235733	1.178083519	0.973161515	1	1	1	1	1.142285298	0.985262009	1.038755459	0.88209607	1.063045852	1.16084425	0.916120815	1	1	1	1.067560747	0.975845411	0.932078737	1.076862066	1.003289196
Q9W347_c12.2	0.948326314	0.971689526	0.929920648	0.986289605	0.975495112	1.394814118	0.900446468	1.379239239	1.096892381	1.132685492	1.096621221	0.937639521	0.977833311	1.154994236	1.189863106	1.352195614	1.05976929	1.157764843	1.043303994	1.008820382	1.052916107	1.031978435	0.979670067	1.061726719	1.045682556	1.001596659	1.218469338	1.282835871	1.197367758	0.955190619	1.111718532	1.015258602	0.969650337	1.066854891	0.950472963	1.064177088	1.144175372	1.114399091	1.015001823	0.991977864	1.026859141	0.976155259	0.970608537	1.015463028	1.039501886	1.351103395	1.047307448	1.403492138	1.172521722
E2QCQ7_C1GalTA	1.191262849	0.952276065	1.168502203	1.219530103	1.19236417	0.940528634	1.134355275	0.996393147	1.163210099	0.990081154	1.134355275	1.468890893	0.91571554	0.864793679	0.768217735	0.770851624	0.769973661	1.153523098	1.038730751	0.948203453	0.996733551	1.277726856	1.493125573	1.0659945	1.329055912	1.214482126	1.123070619	1.105450075	1.234940582	1.019669444	0.894063627	1.065595277	0.98819285	1.087569695	1.17868443	1.097918401	0.984013322	0.908409659	1.064446295	1.072772689	0.875270608	1.196078431	0.916666667	0.912698413	1.131701271	1.114347691	0.90083669	1.063526495	1.544740973
M9PJ95_C3G	1.016800606	0.926129746	0.945696483	0.948608199	0.97440601	1.126659679	0.961370507	0.973463218	1.0136043	0.958851192	0.957339604	1.043668122	1.209111851	1.151778858	1.167477178	1.209111851	1.206637659	1.116244411	1.050670641	0.963859911	1.019374069	1.091665481	1.04181482	0.923623951	1.097994595	0.971625658	1.262289273	1.131169949	1.090872273	0.831063636	0.905347728	1.014059754	0.78408235	0.887270901	0.933614659	1.009629273	0.965221332	0.977172959	0.939165652	1.001699283	0.917103288	0.979348512	0.954462727	0.901794005	1.021027154	0.935330157	0.889796536	0.968534907	1.107607282
Q9VAG5_ca	1.170976624	1.002699347	1.122766291	1.072288506	1.109701452	1.003293203	1.118979745	1.169842461	1.073818455	1.083420855	1.114928732	1.156489122	1.276909466	1.14066647	1.000737246	1.117222058	1.183279269	1.394270123	0.894952251	0.619372442	1.02728513	0.907306434	1.014540167	0.956379498	1.008542348	1.070519811	1.066033926	1.067649435	1.297590199	1.045840065	0.869875586	1.055068326	1.012441362	0.98613094	1.080417218	1.069193477	1.011635082	0.903393565	1.132451888	1.153841634	0.969619509	1.099600734	0.952339844	0.98467681	1.02252377	1.046986061	0.978491646	1.115942029	1.012937874
Q9W433_Ca-alpha1T	1.0527866	0.974541543	0.977947956	0.95971212	1.040928184	1.048996005	0.99528135	1.070071959	1.083284181	1.09626047	1.218709449	1.146514097	1.411600707	0.921052632	0.87753298	0.864205086	0.903984768	1.036540541	0.838486486	0.947243243	1.074162162	1.182861515	0.958301454	0.845065034	1.066182096	0.871078806	1.041139241	1.034915612	1.251793249	0.956962025	0.973073804	0.843146796	0.903487429	0.965287916	0.941529885	1.255094456	1.194177764	0.958563023	1.311427687	1.393775163	0.921430784	0.925264524	1.063918499	1.057782323	1.065492375	1.107518619	0.975351696	1.084052488	1.035129035
M9PD84_Ca-beta	1.072429699	1.016484816	1.050223247	1.007244448	1.017445814	1.070611195	1.118160528	1.086565893	1.151543538	1.041132638	1.142729402	1.220353417	1.097587476	1.062374991	1.003802751	1.111292194	1.065560412	1.065838663	0.899094757	1.144313653	1.010226465	1.122338704	1.104459772	0.979606066	1.120869544	1.032645235	1.068039307	1.066237716	1.262611137	0.953065044	0.981422841	1.057420308	1.083132784	1.076546337	1.031446897	1.068006037	1.022788153	0.944576495	1.069458593	1.04710432	0.998585173	1.014528302	0.951132075	0.984528302	1.056097332	1.0528623	1.00933002	0.968423273	1.070801483
Q8IP22_Ca-Ma2d	1.013879865	0.892386746	0.927765637	0.948998878	1.026548934	1.118569488	0.924057478	1.052611248	1.06736712	0.967088999	1.213071693	1.045194685	1.094587851	1.117679082	1.036428798	1.142857143	1.080070771	1.053356616	0.843810633	1.25766395	1.025999224	0.948396794	0.879091516	1.421104113	0.959800553	1.000882718	1.072535416	1.076066636	1.126043787	0.947447136	0.961577834	1.055347028	0.859004982	1.050842831	0.960310433	1.067269129	1.050471379	0.975936247	1.027709777	1.057867597	0.955362258	1.074006942	0.870998843	0.95028924	1.063661252	1.156634422	0.969264464	1.119328345	1.039280814
Q9V438_CaBP1	1.094985101	0.928900853	1.084924827	1.061743194	1.150968441	0.873469457	1.211419083	0.980268233	1.038441691	0.882758973	1.057943543	1.36413846	1.261086504	1.146043704	0.849715143	0.847735666	0.946709528	0.87299505	0.906669531	1.102838128	1.116747649	1.350161026	1.159118503	0.913139477	1.123266094	0.90373572	0.979141036	0.910677404	1.220560713	0.988118406	0.924553087	1.071183799	0.961840033	0.889734259	1.032960066	0.985042381	1.338533233	0.890281182	1.099982636	1.003311352	0.830228604	1.540625573	0.886012913	0.921344953	1.082220723	0.886914686	0.88778441	0.908734149	0.936817758
Q59E50_cac	1.079898984	0.974316265	0.998602977	0.96835205	1.082961689	1.085809468	0.897518878	0.799083064	0.979503776	0.76995685	0.857605178	0.803128371	1.05029716	1.074069998	1.053709003	1.219898745	1.123376623	1.270261543	1.02534711	1.070713594	1.043913465	1.014809384	0.97829912	0.973900293	0.965249267	1.031378299	1.139189661	1.158662242	1.190971009	0.905606008	0.949394232	1.044172832	1.037525464	0.967620886	0.977159881	1.0422755	1.033905519	1.026741382	1.061356221	1.136118598	0.93658675	1.009496834	1.094051983	1.035738087	0.843646865	1.03630363	0.992367987	1.002062706	1.084658559
Q03017_cact	1.06598087	0.970907778	1.042880347	1.102364194	1.120158816	0.991770439	1.076799572	0.99896785	0.965900837	1.050269506	1.018731603	1.03585764	1.169526902	1.069399351	0.981650046	1.115114796	0.946602505	0.988599408	0.937004421	1.112471224	1.069097819	1.147062125	1.067624446	0.862422134	1.055081654	0.953673046	0.953381444	0.972686581	1.1893974	0.968880363	0.956339057	1.029046401	0.995372062	1.044757033	0.988899143	0.973078444	0.976717205	0.872564272	1.040052736	1.024152933	0.891970995	1.158655429	1.034108119	1.002633832	1.04186071	0.96540111	0.944904886	0.965927329	0.999582162
Q9VVG0_Cad74A	0.966354167	0.837291667	0.91125	0.942708333	1	0.900208333	1.070198779	0.877210831	0.937001096	0.883862889	0.882375959	0.95860072	0.902491874	0.90429758	0.766943542	0.862645961	0.902973396	0.871786734	0.723421136	0.847508727	0.80910822	0.919963342	0.865816404	0.972048266	0.925385673	0.810523904	0.956357759	0.839439655	1.089439655	0.815193966	0.851942117	1.012871287	0.841051028	0.948819497	0.922784422	0.868138608	0.885372585	0.738853113	0.916835327	0.930205458	0.705734437	0.915820995	0.730327732	0.78189985	0.842690997	0.942751153	0.767194706	0.851914979	0.887365198
Q9VGG5_Cad87A	1.091715405	0.886348069	0.988706816	0.978432302	1.094613345	0.930168432	1.014048103	0.883283475	1.026229508	0.917530214	0.950604284	1.166255833	1.237610977	0.937072908	0.865886468	0.957035243	0.978611784	0.925808877	0.795560192	1.116518111	0.976542964	1.212873379	1.098040524	0.914748337	1.090433932	0.973287961	1.001225583	0.941942739	1.154019154	0.927033584	0.846570105	1.03224134	0.915394835	0.992417614	1.05471722	1.015137586	0.990616282	0.870339843	1.053163835	1.099416688	0.862113239	1.106776923	0.834615875	0.889417967	0.972611812	0.920211937	0.832320399	0.892044569	0.954817465
Q9VAF5_Cad99C	0.967556874	0.777645895	0.872007913	0.826310584	1.00553907	0.864688427	1.168172888	1.258939096	1.32259332	1.039292731	1.095874263	1.317878193	1	1	1	1	1	1.37892995	1.036403751	1.188637617	1.115278544	1.147833475	0.980458794	0.704616256	0.938261116	0.789861229	0.806733828	0.772534464	0.803950159	0.87009544	0.884585442	0.760023355	0.952510705	0.843324251	0.97525583	0.968797182	0.923167254	0.760778393	0.984734105	1.05124979	0.79953028	1.061555159	0.755562447	0.76323746	0.803743961	0.569444444	0.665458937	0.801932367	0.769449986
O15943_CadN	1.042575235	0.934984831	1.018176644	0.97540052	1.043365767	0.939919608	1.037055597	0.965244936	0.971025404	0.957965741	0.949975643	1.136626491	1.134905601	0.919562754	0.924284911	0.965330209	1.009566234	0.96676036	0.843057467	1.06564427	0.967991313	1.166508127	1.107906443	0.917600649	1.067059284	0.998645889	0.977015244	0.968299535	1.136235244	0.98391566	0.877816391	0.961455355	0.978853823	1.004212565	1.069468096	0.947794883	0.912447181	0.882165835	1.053158509	1.067310755	0.884308313	1.085169261	0.877526186	0.914730352	1.048615507	0.949599368	0.880370326	0.954610554	0.954518386
Q9NHE5_Cadps	1.009970788	1.015745439	1.025748918	0.96403044	0.993688281	1.008464662	1.056215264	0.889395075	0.969455056	0.982853131	0.963238007	1.031580325	1.00983517	0.94759574	0.989202353	1.054167191	1.079885663	1.031366147	0.938250988	1.053901463	0.975792036	1.032154816	1.10485847	0.931946742	0.989908982	1.049264066	1.041119804	1.041826872	1.09701813	0.995973307	0.953032301	0.987476598	0.981574927	1.054176773	1.079622243	0.939261288	0.894942004	1.000714827	0.95689657	0.938863922	0.97799369	0.98753192	0.992992223	1.041426278	0.913376271	1.014816223	0.987837538	0.973347857	1.004858046
Q24572_Caf1-55	0.968057455	1.016430577	1.085524599	1.00787081	0.969456246	0.890393227	1.127460649	0.92749651	0.97734346	0.966226514	0.869247813	1.084555386	1.090803011	0.900303104	0.93296145	0.982624906	1.135941258	0.91006695	0.924291581	0.978292669	0.964377473	1.096260459	1.155900279	1.044574911	1.010554044	1.048965256	0.93960936	0.939191191	1.10386284	0.998919729	0.95687685	1.008567182	0.989984139	1.070935272	1.078251875	0.953900526	0.880432721	0.876484786	0.973510904	1.182854926	0.918550125	1.040043425	0.975092943	0.94180543	1.172374674	0.868664725	0.936210333	0.884309367	0.95417463
Q9V396_CAH1	1.170893984	0.865929225	0.782978291	0.823036505	1.103841674	0.874159167	0.752467811	0.935538105	1.184628299	0.895436904	1.111715969	0.919025572	0.91313891	1.293076293	0.958394569	0.956618524	0.922138819	0.972367213	0.884736418	1.084920009	1.254407382	0.949935705	0.8223028	0.918399926	1.193792936	0.929956789	0.91337935	0.937541569	1.193046282	0.839980823	0.994671696	1.097266435	0.996213576	0.861191002	0.760166746	1.196406745	1.247620776	0.936402795	1.16864068	1.0534398	0.929167712	0.852945683	0.964900957	0.975951818	1.212236891	0.882896564	0.936505697	0.938914725	0.892035489
Q9VTU8_CAH2	1.001205772	1.022332735	1.034944298	1.238448535	1.054034719	0.974303797	1.125518609	0.978355022	0.967112586	1.167634737	0.875543907	1.067697476	1.052471961	0.956795017	0.949686242	0.994665862	1.08146451	1.01489788	1.016615172	1.059760313	0.996161778	1.019808689	1.098995045	0.977480775	1.06066033	1.120134801	0.973779474	1.00001151	1.101319659	1.08450307	0.929082979	0.951956451	1.080953813	1.098320067	1.102679907	0.939228369	0.9170739	0.967081736	1.078416846	1.029498924	1.032063429	1.001210855	1.000352612	1.040290871	1.026708926	0.976289885	1.057032274	0.922457563	1.023447586
Q9W3C8_CAH3	1.100822912	0.988595866	0.955679388	1.077949848	1.010237802	0.994038748	1.023484179	1.099963631	0.930742453	0.956097054	0.841014184	0.953966852	1.147638411	1.105254926	1.087894901	1.103847357	1.156553018	0.967599115	0.922117126	0.862044677	0.84312739	1.055734284	1.080427789	1.099817407	1.012694548	0.942961482	1.003340142	0.981311765	1.025396124	0.995334842	0.990215726	0.843215843	1.036072144	0.812802075	0.945516007	0.843242527	0.817392457	1.027838536	0.910320143	0.887320209	0.999867436	1.450472172	0.80008037	0.863974282	1.154569349	1.05923979	0.983117671	1.072078447	1.056850988
Q9VH26_CAH7	0.938316322	1.140759259	1.138682467	1.040915757	0.967903227	0.848778039	1.136646576	0.846000273	0.903434193	1.003317291	0.869988006	1.21246603	1.21292567	0.908023397	0.991363133	0.956135249	1.116877558	1.005546448	0.941226041	1.049979316	1.04846247	1.238240386	1.167980969	0.951637543	1.133069503	1.078588992	0.984391399	0.940250765	0.993261952	1.084624746	0.92984657	0.951730745	1.019347679	0.938352104	1.050334076	0.787388641	0.804612101	0.993912398	0.958537491	0.973849295	1.021148849	1.099096259	1.137709589	1.154897016	0.927737945	0.914825509	1.02431085	0.796310115	0.992653304
Q9VB76_CAH9	1.018241146	0.921868981	0.964265482	1.066687816	1.125920555	0.95386463	0.858165804	0.977207019	0.884656761	1.049317555	0.880757077	0.914139716	0.942879138	0.796458814	0.785835258	0.817205543	0.870939184	0.883839623	0.944692546	0.944545321	0.883986848	0.901353907	0.832367686	0.887334514	0.85707424	0.988051995	0.906802535	0.936068905	0.983622964	0.925181209	0.896439123	0.98973721	0.949619033	1.235266677	0.83102007	0.931390718	0.836027759	0.909092701	0.867749694	0.971925397	0.921966799	0.976860025	0.830832282	0.853278689	1.054427879	0.889826956	0.887372014	0.892820789	1.024696605
Q9VHJ5_CAHbeta	0.903212164	1.090386575	0.787681898	0.973914381	0.937871244	1.902058784	0.735616259	1.42446739	1.153287152	1.147222585	1.122023265	0.732061168	0.854911335	1.168491856	1.609539163	1.6040358	1.14453277	1.281327014	1.165402844	1.065023697	1.058862559	0.83416144	0.808300073	1.167386169	1.013236133	1.010996172	1.391452243	1.433146976	1.27408056	0.892294221	1.272455426	1.128621089	1.044555751	1.131424513	0.832000368	1.157596372	1.164628915	1.390375069	1.006833364	0.903275725	1.186416008	0.669754297	1.147530121	1.15733391	1.007101053	1.55762778	1.199804916	1.443815841	1.24517334
A8DYJ3_CalpA	1.005037741	0.905585501	0.857701449	0.894326527	1.062251211	1.124451389	0.918905624	1.077280411	1.125698014	1.031990883	1.138435478	1.06127631	1.039075033	1.075062707	1.04217421	1.172723701	1.008038951	1.016853589	0.927113473	1.070762345	1.002688008	1.060223354	0.93086854	0.957857495	0.986825123	0.944462766	1.027727132	1.099047349	1.127872471	0.850615597	0.961846824	1.046614279	0.887798663	1.002354889	0.89858116	1.077153335	1.051007188	0.98631833	1.039691993	1.011456244	0.951991391	0.978514075	0.912353442	0.948757468	1.004742677	1.112447342	0.913768516	1.156863495	1.039561474
M9NE73_CalpB	1.036367338	0.895823234	0.886602936	0.933741832	1.038199763	1.203573714	0.936069819	1.085144337	1.132885777	1.06843771	1.142898245	1.029634602	1.019132225	1.147754481	1.103873436	1.271341941	1.010024838	1.033006546	0.919797478	1.023315812	1.015253636	1.088568953	0.978689881	0.959526529	1.050774018	0.966065309	1.104525619	1.153223659	1.244063838	0.889860892	0.988124959	1.014199855	0.911194769	1.0456773	0.936301392	1.128007418	1.123640917	0.999873205	1.063658985	1.040621929	0.938694646	0.988140922	0.932481568	0.936061667	1.038471076	1.194125073	0.942806258	1.212453222	1.120999988
Q53YH3_Calr	0.973196794	1.013753589	0.978994836	1.011444563	0.924770271	0.756521121	1.136484056	0.882389207	0.846016353	0.914730989	0.821303352	1.148161897	1.173086533	0.950207779	0.935723856	0.864559381	1.038512559	0.863788101	1.032171777	1.027384884	1.016742315	1.126727297	1.12879048	1.029138745	0.98818869	1.035027894	0.939638113	0.807205478	0.706198781	1.004385832	0.995302963	0.982469293	1.093063553	0.955792976	0.945897234	0.8491434	0.936207252	0.897673438	0.860518263	0.846338925	0.915088624	1.164044934	0.977249336	0.86958488	0.950852778	0.854571975	0.978934679	0.880396808	0.867830717
L0MQ08_Cals	0.969705334	0.915188738	1.018632255	0.936684839	1.016354979	0.910461666	1.031875374	1.114679449	1.059197124	1.087717196	1.104853206	1.172558418	1.018942251	0.980387227	0.95214148	0.942586539	1.065543542	0.81819586	0.921223355	0.988260735	1.09669447	1.068006065	1.021531463	1.008112206	0.93009856	0.973085671	0.964973003	1.001430615	1.121509991	0.949651576	0.835554295	1.004441924	0.91758813	0.936348171	0.941276838	0.841366889	0.861036068	0.830276316	0.9298071	0.934357079	0.806625906	0.99845628	0.81789613	0.834821921	0.895892129	0.994982753	0.850109752	1.103167137	0.834606852
Q9VDG5_Calx	1.045728941	0.959689343	0.92436376	0.998568518	0.929543464	1.090440777	0.96043322	1.007891985	1.042436593	1.024588037	1.064460116	1.004930583	1.029472968	1.084240358	1.024111711	1.15237463	1.029249815	1.058799543	0.929583742	1.030682352	1.039444674	1.04935043	1.044675126	0.991701669	1.045647483	1.018372657	1.066176023	1.078874629	1.126654907	0.928278896	1.001669727	1.036743246	0.946725994	1.083231963	0.986853171	1.055593059	1.02818309	1.012498161	1.028258517	0.981954224	0.969852051	1.000017352	0.94231178	0.987141835	1.035580175	1.152750472	0.97637327	1.126907046	1.071072038
P62152_Cam	1.088688608	0.867699088	0.826450422	0.928951242	0.908006998	0.988516181	0.931700266	1.161179943	0.990921977	1.161179142	0.996158713	0.940495276	0.980107209	1.060732451	0.955578864	0.917534006	0.79140685	1.066252092	0.829353049	0.98882044	1.026028951	0.903280967	0.803870569	0.792623457	0.959616604	0.751196701	1.039503054	0.994897623	0.956538865	0.97297117	0.925286643	0.926614053	0.911180714	1.170998203	0.87932122	0.987063318	1.035793673	0.959179175	1.033864295	0.926808875	0.936140184	0.95397077	0.85329539	0.864544885	1.068203131	1.040060506	0.870561114	1.097778576	1.08411609
A4V110_CaMKI	1.179674904	1.160209257	1.098995924	1.163011812	1.154258153	1.041145657	1.061323913	0.917665441	1.160243782	1.098531681	1.10088992	1.062701979	1.072741328	1.124098947	1.087805585	1.094289303	1.229123587	1.04675745	1.119131647	1.067123453	1.066297106	1.052830536	1.084706628	1.082387438	1.112455174	1.128444304	1.101731633	1.05398493	1.267758296	1.109411679	1.062978313	1.073603461	1.083028849	1.144761957	1.111454444	1.181067466	1.129450012	1.0612018	1.142921769	1.094225623	1.121468168	1.037842358	1.117694613	1.119276605	1.179394432	1.016401981	1.081531898	0.952834496	1.137787797
Q00168_CaMKII	1.02959328	0.958933046	0.945345661	0.879908083	1.020119348	1.067638753	0.990284364	1.026792573	0.992383935	1.01806015	1.043530249	1.059115722	1.026372234	1.03475543	1.015858173	1.041671683	0.879022257	1.042160375	0.893219127	1.022342105	0.862840438	1.020353719	1.012128979	0.860868406	0.938378018	0.706542267	0.976250016	1.017026806	0.953984405	0.97870234	0.908716516	0.995859541	0.901378095	1.043520252	0.929706332	0.976214917	0.993513159	0.99701894	0.970697932	0.945108026	0.987043854	0.994947298	0.933612893	0.974665103	1.008434404	1.066145631	0.938051155	1.051528975	1.073456974
Q9VXF1_CanA-14F	1.06097593	0.9577743	0.966593813	0.931827543	1.055660035	1.00901932	0.987768104	0.946427322	1.023909858	0.978409854	1.050162115	1.094057038	1.050011027	0.986754624	0.94907616	1.014269414	1.011887663	1.003003721	0.934185726	1.063038006	1.020268428	1.051455865	1.025703711	0.914301585	1.032193422	1.008183591	1.065423872	0.911635149	0.79528909	0.863245972	0.925185154	1.003898717	0.957759009	0.984695718	0.989935654	1.017875088	0.971366861	0.975707204	1.022517286	1.036091404	0.956178473	1.036946159	0.936394842	0.971662532	1.04914328	1.010548313	0.931675657	1.023556137	1.019318744
A0A0B4K6N5_CanA1	1.130739796	0.999362245	0.997995627	1.084092566	1.148050292	1.059402332	0.762802071	0.918872267	1.049913694	0.88981588	1.325517837	0.996547756	0.93449551	1.039091389	0.952192287	1.025884839	0.85076598	1.047333456	0.862059421	1.196530725	1.144583872	1.022297625	0.903296171	0.740426563	1.028599127	0.791565681	0.98792875	1.050787575	1.164213161	0.931473576	0.956638116	0.926927195	0.855728051	0.923715203	1.106048704	1.098291438	1.1685978	1.002847604	1.162117046	1.167124902	0.968774548	1.105572863	0.851159571	0.924195223	1.039581438	1.164998483	0.846678799	1.220351835	1.297407219
P48451_CanB	0.6789749	1.358108914	1.019610963	0.83258085	0.658190461	0.765732527	0.799406528	0.79589845	0.667840422	0.747220574	0.682914606	0.633972964	0.608116739	0.635352956	1.153977722	0.777022419	1.263907683	0.921941179	1.093377667	0.850004618	0.869202655	0.668462453	0.868224607	1.108248678	0.72922786	1.206940524	0.655376267	0.789639186	0.571857256	1.033206354	0.916483072	1.046018614	0.905354975	1.154399532	0.702905098	0.650558863	0.631125525	1.248449665	0.675401354	0.660065108	1.29227989	0.667556761	1.289663955	1.177265631	0.678561541	0.757421478	1.212046636	0.874796198	0.752169452
Q24214_CanB2	0.996000062	0.946277641	0.935665721	0.929599538	1.003056483	1.000744628	0.917326232	0.951608847	1.002288138	0.986315556	1.027354094	1.042744779	0.977380634	0.974388807	0.983118582	1.019931058	1.090752076	0.976438159	0.868504752	1.041154511	0.994846851	0.935841255	0.942650397	0.981707454	0.97310801	1.021551046	0.990327505	0.967656136	1.135334938	0.94796451	0.975608781	0.92232376	1.042927746	0.970639953	0.946870908	1.008814883	0.967608424	0.943115711	1.016723338	1.02389802	0.959786294	0.949234534	0.949614509	0.97149371	0.969039034	0.984848067	0.950226119	0.953130608	0.992414701
M9PB90_Cand1	1.023835223	1.023085892	1.135988725	1.03532136	1.048947284	1.001198389	1.170727474	0.932160328	1.094962127	0.968672085	0.9983549	1.17873205	1.158525646	1.002531327	0.958275572	0.979012069	1.119427682	0.96846522	0.987335107	1.074993208	1.062583222	1.147254145	1.185672626	0.977734626	1.049685921	1.016384606	1.035077624	1.024319501	1.178864001	0.977869448	0.974133333	1.04013516	1.056818265	0.996796347	1.200285392	1.050191852	0.981704814	1.008695403	1.040735244	1.101882254	1.005116066	1.111980908	1.035128437	1.043803679	0.932098706	0.978701718	0.994576871	0.972076655	0.969114492
A0A0B4K7L3_CAP	0.998996685	0.831782896	0.839157493	0.91597814	0.98038912	0.992334118	0.880141925	1.136960641	0.976450021	1.004412522	1.035190243	0.977644226	0.957668819	0.9782219	0.940033181	0.997313692	0.930607989	0.946018692	0.874557507	0.977658339	0.963848053	0.956750414	0.899614615	0.954858075	0.945680476	0.929390548	0.959642128	1.010275212	1.143747933	0.852935914	0.900106784	0.949489974	0.88836644	0.992371726	0.861015296	0.970839429	1.003983966	0.897452588	0.967718917	1.002064683	0.92334501	0.912576653	0.831654005	0.857547376	1.090316049	1.023680817	0.913941394	1.066984704	0.945237068
Q9NIP6_Capa	1.062149043	0.792328924	0.823546207	0.899495574	1.046350052	1.149709717	0.583149171	1.622375691	1.252762431	1.076519337	1.387016575	0.747928177	0.807252422	1.696784177	1.176803014	1.296959096	0.818285791	0.984228972	0.816004673	1.155373832	1.273656542	1.046084587	0.828574813	0.778817676	1.134344272	0.863167871	1.353787307	1.462019179	1.652515893	0.761124879	1.017176931	1.195265219	0.761658953	1.033819865	0.808377839	1.089955601	1.429122965	1.069815327	1.066211955	1.078115951	0.878900972	0.802869833	0.891014691	0.937250883	1.257158342	1.317586487	0.967392286	1.379369524	1.154196043
Q9VM49_Caper	0.99251965	1.12162826	1.199245266	1.053590568	1.001518399	0.977648267	1.117835968	0.866883117	0.925395257	0.945793337	0.906514681	1.109083851	1.021613215	0.919821946	0.998176553	1.006972005	1.111981122	0.907012278	0.849331514	1.148867667	0.988867667	1.170985125	1.182891807	0.987383434	1.139556645	0.982543319	1.007971459	1.034450081	1.142454986	0.994453425	0.948425752	0.907601034	1.150669643	0.874177632	1.144592813	1.059716889	0.982482282	0.930903395	1.04282958	1.128698875	0.974554416	1.024076039	1.02253881	1.036330569	1.021721332	0.918154838	0.968786778	0.909379317	0.886639078
Q9I7D3_Capr	1.014392017	0.920797524	1.074902099	1.01744005	1.024039704	0.867397311	1.030354132	0.947849916	0.955548061	0.958195616	1.037647555	1.123220911	1.325907717	0.88434622	0.84108632	0.883252373	1.273179567	0.91534525	0.879006295	1.072774014	1.026920859	1.222880784	1.152967278	1.091788941	1.016109152	0.925734987	0.952136552	0.921771737	1.134489493	0.995625342	0.849493045	0.917320528	0.96483161	0.915944872	1.11958443	1.083886991	0.967172679	0.842694841	1.00252343	1.491301556	0.872799814	1.234548312	0.882786873	0.943739225	0.946647702	0.858814889	0.884147702	0.884975086	0.921768381
Q9VU53_caps	1.062364816	0.902811824	0.995602019	0.953857246	1.095818313	1.060994953	1.072237474	1.116849691	1.165579959	0.971002059	1.092312972	1.018188058	1.254084115	1.052832812	1.038581856	1.228362878	1.070559611	1.211365902	0.913260219	1.236291127	1	1.219493177	1.139961014	0.923976608	1.112280702	1.17037037	1.002991325	1.087645827	1.202512713	0.965749327	0.881929446	1.016558675	0.840892729	0.917206623	1.14816607	1.141875544	1.014032711	0.942804607	1.09551921	1.171876512	0.898287042	1.075874039	0.842548971	0.783287875	1.071314952	1.077677625	0.981707317	1.022401909	0.872237569
Q9VPX6_capt	1.044511607	0.906982748	1.005356273	0.926542543	1.103566965	0.840308667	1.07032605	0.93178904	1.004258802	0.865684585	0.951812281	1.196527416	1.131687984	0.879007068	0.833769774	0.828821945	0.992071693	0.803507287	0.819187309	1.058513559	0.991652435	1.133021843	1.05296329	0.917499917	1.016353266	1.001951746	0.824099478	0.823321834	0.871959077	0.910831304	0.828981865	0.965726159	0.953193086	0.889983787	1.009381012	0.96103125	0.937523607	0.874243295	1.01572712	1.092180237	0.907278919	1.125290827	0.873403674	0.894352495	1.003055569	0.816284451	0.859783028	0.898390724	0.822921389
B7Z011_capu	1.013637231	0.832443258	0.897768453	0.956418081	1.091741369	0.977684532	0.996817902	0.983370971	0.99507288	0.880106754	0.971258468	1.058098953	1.083628419	1.112107285	0.980938748	1.074060122	0.991185113	0.986448334	0.86391869	1.162055336	1.094014681	0.997581377	0.986193691	1.008565958	1.008465182	1.030837448	1.133170599	1.110659072	1.289937619	1.015459723	0.871954611	1.085660251	0.92190455	1.03315163	1.088874719	1.051557661	1.038440517	0.937359568	1.061911702	1.087052894	0.935173377	1.19883856	0.967131243	0.966782811	1.055827221	1.023634882	0.862265689	1.158720456	1.111177082
A4V4S5_car	1.110431612	0.967356059	1.035399271	1.007291544	1.101325583	1.057828329	1.20321886	0.841255809	0.995602403	0.892508217	0.959832257	1.21183271	1.104566379	1.010180122	0.937142769	1.033166497	1.030617604	0.999680909	0.9912569	1.060531606	0.985608986	1.118748544	1.106886399	0.997098011	1.061005317	1.044673685	1.039083409	1.051002952	1.192423365	0.979761609	0.968534831	1.142516444	0.977266608	1.036735008	1.091929713	1.100771249	1.04023217	0.96466566	1.114844558	1.083263099	0.965349447	1.101840971	0.889698394	0.979913827	1.023489933	1.041836179	0.924334689	0.991487653	1.048979843
Q9VIK2_CarT	0.881896363	0.858574448	0.879090445	0.885831936	1.170942351	1.079586036	0.83223604	0.903844591	0.832642445	0.871576038	0.858164675	0.778834431	0.796986663	0.962583641	0.984113979	1.017615731	0.957986253	0.930960395	0.916636826	1.590918857	1.343908902	0.894682429	0.945565694	0.910235088	0.893873331	0.968265384	1.058879939	1.135916123	1.159570387	0.906981204	0.747523935	1.07246616	0.776493892	0.964262133	0.976575448	0.926816692	0.899488048	0.885750064	0.85245479	1.001952046	0.817759935	0.822480902	0.86815985	0.913838799	0.927045679	1.146237266	0.916036806	1.146565889	0.890179878
Q24210_CASK	0.97902163	1.045186948	0.972988524	0.888552541	0.980051827	1.038225184	0.927270732	0.933750499	1.033642456	0.913019746	1.022258549	0.986145734	0.983282003	1.019403682	1.040170867	1.101963888	1.070409464	1.040583458	0.96582333	1.005480616	0.97730114	1.021839386	1.005867414	0.972520559	1.037297218	1.046872134	1.054008658	1.100874759	1.09988117	0.941765859	0.976130082	0.997439999	0.971070315	0.997918535	0.949380219	0.954218577	0.914512606	1.052559615	0.935731782	0.91387722	1.015446824	0.93925964	1.04372543	1.057177371	0.971399746	1.058100252	0.982834512	1.053315355	0.982117517
A0A0B4LFH2_casp	1.060412314	1.035832054	1.152402648	1.075729353	1.139955194	0.995469076	1.129197966	0.98640114	1.050226061	1.033390215	1.003641609	1.16888623	1.144573835	0.939709283	0.952841097	1.024074992	1.169185662	0.978602372	0.954754299	1.125869689	1.072944471	1.227729817	1.178232616	1.0175268	1.048169054	1.029100655	1.045032962	1.012252785	1.236917481	1.001273017	1.018909044	1.153387603	1.043202359	1.099608999	1.21673996	1.126435671	1.085761691	0.993508272	1.108925724	1.254901013	0.972083958	1.173628704	1.037206151	1.02380251	1.054836375	0.980622337	0.972139584	1.038996543	1.012796224
Q9V431_cass	1.037401676	1.072580452	1.210300812	1.053877898	1.057791987	0.906988072	1.257348859	0.825171889	0.974284331	0.932048855	0.936454611	1.224864411	1.22857868	0.915672091	0.908046548	0.929477523	1.129523873	0.951510918	0.940587809	1.074790438	0.982831419	1.176646277	1.256994342	0.959369346	1.034151805	1.116515896	0.956203914	0.937696627	1.136336068	1.066626942	0.879918901	1.007639364	1.063899034	0.982320329	1.226743826	0.938655231	0.884351211	0.937511626	0.986907099	1.022954772	0.960204609	1.150683819	0.996325619	1.024285098	0.930735175	0.889006916	0.965417728	0.867052689	0.868874724
P17336_Cat	0.894441299	0.970720466	0.801556556	0.98336959	0.916378103	0.838456954	0.89160361	0.970475188	0.979386301	0.888238253	0.796402964	0.914095711	0.910068499	0.947656912	0.990337197	0.909171047	1.053317237	0.9386543	1.066509085	0.962199984	0.985794484	0.922261767	0.880028773	1.050129635	0.942458867	1.048734482	0.917904885	0.872198396	0.854226529	1.043574587	1.008099463	0.956537403	1.021074211	0.863153642	0.859765136	0.965819191	0.975011785	1.044971479	0.949839644	0.915789166	1.078997597	0.870187172	1.072286444	0.982776577	0.861954777	0.795221228	0.959725406	0.961358248	0.905334028
Q7K485_cathD	0.759327133	0.770592302	0.993223943	0.85867018	0.971074039	0.971065343	1.095901266	1.316201144	0.928987081	0.895034459	0.878293987	1.087562025	1.095686272	0.868377033	0.814425926	1.056959748	0.883402959	0.810252326	0.828041433	0.792677571	0.818820098	1.034946804	1.06812759	0.813183379	0.843543621	0.834167215	0.615910919	0.849474754	0.571773586	0.967786907	0.822896535	0.784974246	0.925926272	0.811129266	0.985143711	0.869290671	0.958194245	0.820449643	0.808307033	0.919133392	0.799531155	1.106521979	0.786523452	0.778064944	0.957751629	0.982144103	0.775158122	1.126925548	0.861620984
Q9V3A4_Catsup	1.021407111	0.962819229	1.030295443	1.079744617	1.065723585	1.127190786	1.07054148	0.909687034	1.063586687	1.188971684	1.071038251	1.082066567	1	1	1	1	1	1.051994092	0.980797637	1.097784343	0.814180207	1.123754905	1.022638092	1.000603682	1.11017205	0.896921219	1.234343866	1.173996584	1.202391119	0.994733846	1.165477589	1.083683062	1.0894326	1.099924459	1.111497157	1.07654243	1.137713203	1.154032428	0.98694462	1.036639292	1.073910297	1.034795416	1.015694758	1.014221936	1.152840623	0.93916541	0.962795375	1.074912016	1.163108078
Q27294_caz	1.290451523	0.99564981	1.122892877	1.056189958	1.289583393	0.89053929	1.140384212	0.811065316	0.91742927	0.853705903	0.851526371	1.19948306	1.218715757	0.921968978	0.844668469	0.85634451	1.045815375	0.84271979	0.831620371	1.09711271	0.969714442	1.25290099	1.161538655	0.937622444	1.077786708	1.049492641	0.911060576	0.896718658	1.200089288	1.034236446	0.792306996	0.990444129	1.010220102	0.928157362	1.12915053	1.120221774	1.038081349	0.859506236	1.20566405	1.259718104	0.904067468	1.23268065	0.900644936	0.930441772	1.085777174	0.811808118	0.874134136	0.75799508	0.847534072
Q7K284_cbc	1.018220585	1.032758286	0.981585579	1.010273309	1.045745299	1.063190541	1.08	1.238095238	1.52952381	1.32	1.308571429	1.281904762	1.068928379	1.061209837	0.944713696	0.996589481	1.008795548	1.049606299	0.898818898	1.06003937	1.053149606	1.064497385	1.091807089	0.928529924	0.955839628	0.982858803	1.069776795	1.053086668	1.2887593	1.126281922	0.811281128	0.98649865	1.01890189	0.908490849	1.283277169	1.156486942	1.133319292	1.031171019	1.150379107	1.25884583	0.98525695	1.060603691	0.919533938	0.967078511	1.120030251	1.028305964	0.917566984	1.042891098	1.09922376
Q9VSK2_Cbl	1.055520008	0.911305803	0.934045381	0.904661121	1.038145395	1.111827534	0.841904762	1.00984127	1.143809524	1.036190476	1.247301587	0.99015873	1.097137184	1.335429422	1.09630978	1.14446467	1.17656793	0.952165156	0.732628399	1.046827795	0.977844914	1.010515604	0.988297151	1.012042062	1.10651289	0.986431479	1.125193967	1.114952517	1.198311712	0.927006393	0.972171066	1.16410886	1.042561899	0.986290158	0.998103618	1.132746719	1.131229614	1.071683228	1.142076917	1.093757111	0.981187893	1.003892334	0.895896556	0.952236443	0.971126656	1.063327876	0.905938384	1.073150766	1.259259259
Q9V3L6_Cbp20	1.013930449	0.913381366	0.99678975	1.018970977	1.037288283	1.004735481	1.072959802	0.994366038	0.953717006	1.009296037	0.978478267	1.108960816	1.165914885	0.963097339	0.9827744	1.037883245	1.073347715	0.993213384	0.976957071	1.050347222	1.050347222	1.076197134	1.129929141	1.041371421	1.063995424	1.044453624	0.97084634	0.991371694	1.197184758	1.022557277	0.902884087	0.975536009	0.985896731	1.04173891	1.004770757	0.96323227	0.933966144	0.856219257	1.048826229	1.122657805	0.89749453	0.992576244	0.932928227	0.997133685	0.993760516	0.935081324	0.885656197	1.044727987	0.989775172
A0A0B4LFM0_Cbp53E	1.103596275	0.933186671	0.882537673	0.939278492	1.093826446	1.017615673	0.929034197	1.124275155	1.028049892	1.131315569	1.050026768	1.035821961	0.978908046	0.990470563	1.130279874	0.993116238	0.874181051	1.085902001	0.900835677	1.074368637	1.085879395	1.00948958	0.953635271	0.954355705	1.113136388	1.042797824	0.977854177	1.075200076	1.009381132	0.982202723	0.954256691	0.964883944	0.924649536	1.072153456	0.909601656	1.013977288	1.023280624	0.981929987	1.042295826	0.962756944	0.966958301	1.021213453	0.892491499	0.959982688	1.125273709	1.081912766	0.976183914	1.061708615	1.007049651
Q7K4N3_Cbp80	0.996586288	1.114588464	1.143387365	1.108700384	1.037894496	0.990079615	1.172148813	0.803566389	0.963335471	0.897139192	0.886157793	1.026632457	1.15007744	0.957711687	0.961064168	1.037602682	1.13268767	1.03251728	0.966665532	1.122850625	1.029589022	1.043425814	1.184302636	1.11639542	0.990428919	1.143091617	1.005041419	1.000711238	1.139758179	1.039243578	1.016666667	1.100436443	1.098199673	1.043262411	1.24181104	0.985492507	0.863458886	1.030417806	0.991244067	1.085630451	1.047660798	1.038688329	1.08693056	1.09219267	0.97953139	0.986994076	1.015967833	0.983486117	0.925801239
[truncated: 5,455 more rows]
[truncated: 26 more columns]
